# Supplementary material for: Quantitative analysis of steric effects on the regioselectivity of the Larock heteroannulation reaction
Source: Royal Society of Chemistry journal article supplement (doi:10.1039/d2ob02089k), 2023-01-01
Supplement: d2ob02089k1.pdf [file d2ob02089k1.pdf]

## SUPPORTING INFORMATION

### Quantitative Analysis of Steric Effects on the Regioselectivity of the Larock Heteroannulation Reaction

Poomsith Thangsan,<sup>†</sup> Thanya Rukkijakan,<sup>†</sup> Bongkotrat Thanaussavadate,<sup>†</sup> Kanyapat Yiamsawat,<sup>†</sup>

Jakkapan Sirijaraensre,<sup>‡</sup> Kevin P. Gable,<sup>§</sup> and Pitak Chuawong<sup>\*,†</sup>

<sup>†</sup>Department of Chemistry and Center of Excellence for Innovation in Chemistry, Faculty of Science, Special Research Unit for Advanced Magnetic Resonance (AMR), Kasetsart University, Bangkok 10900, Thailand

<sup>‡</sup>Department of Chemistry, Faculty of Science, Kasetsart University, Bangkok 10900 Thailand

<sup>§</sup>Department of Chemistry, Oregon State University, 153 Gilbert Hall, Corvallis, Oregon 97331-4003

\*Correspondence should be directed to Pitak Chuawong, Phone and Fax: +66 2 5625555 Ext. 647589. E-mail: Pitak.C@ku.ac.th

#### Table of Contents

|                                                                                                                                                                       |            |
|-----------------------------------------------------------------------------------------------------------------------------------------------------------------------|------------|
| Proposed Auto-Oxidation of <b>9b</b> to <b>17</b> .....                                                                                                               | <b>S2</b>  |
| <b>Figure S1.</b> Correlation between substituent and average regioisomeric ratio determined by <sup>1</sup> H NMR of crude reaction mixture and isolated yields..... | <b>S3</b>  |
| <b>Figure S2.</b> Correlation between predicted and experimental $\Delta\Delta G^\ddagger$ (kcal/mol) without the <i>t</i> -Bu and 1-Ad groups.....                   | <b>S4</b>  |
| Linear regression with wSterimol steric parameter.....                                                                                                                | <b>S5</b>  |
| <sup>1</sup> H, <sup>13</sup> C { <sup>1</sup> H}, and NOESY NMR spectra of the synthesized compounds.....                                                            | <b>S8</b>  |
| <sup>1</sup> H NMR spectra of crude reaction mixture from the Larock heteroannulation.....                                                                            | <b>S50</b> |
| Energy and coordinates for all calculated structures.....                                                                                                             | <b>S54</b> |

### Proposed Auto-Oxidation of 9b to 17

It is worth noting that the regioisomeric product ratios obtained from the  $^1\text{H}$  NMR analysis are not in accordance with those calculated from the isolated yields (See **Figure S1**) due to separation difficulties and compound stability issues. Indeed, aerobic oxidation of 3-alkyl-2-arylindoles was first reported in 1951 by Witkop and Patrick,<sup>1</sup> followed by several reports on similar observations,<sup>2</sup> including the oxidation/photorearrangement to afford *N*-(2-acylphenyl)benzamide.<sup>3</sup> We demonstrated the auto-oxidation of 3-alkyl-2-phenylindole using **10a** as a representative. After the  $^1\text{H}$  NMR acquisition, the crude reaction mixtures containing **10a** were kept in  $\text{CDCl}_3$  at room temperature for four weeks. Then, the mixtures were purified to afford **17**.<sup>3b</sup> The proposed auto-oxidation of **10a** to **17** was illustrated below.

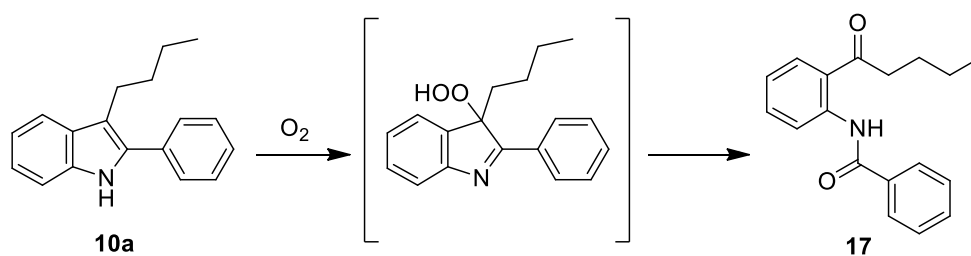

### References:

1. B. Witkop and J. B. Patrick, *J. Am. Chem. Soc.*, 1952, **74**, 3855.
2. (a) M. S. Masako Nakagawa, Yasuji Watanabe, Tohru Hino, Yasumaru Hatanaka, and Yuichi Kanaoka, *Heterocycles*, 1982, **19**, 503; (b) F. McCarpa and P. V. Long, *Tetrahedron Lett.*, 1981, **22**, 3009; (c) B. Robinson and M. U. Zubair, *Tetrahedron*, 1973, **29**, 1429; (d) B. Robinson and M. U. Zubair, *J. Chem. Soc. C*, 1971, 976.
3. (a) W. Ding, Q.-Q. Zhou, J. Xuan, T.-R. Li, L.-Q. Lu and W.-J. Xiao, *Tetrahedron Lett.*, 2014, **55**, 4648; (b) A. Alberti, P. Astolfi, P. Carloni, D. Döpp, L. Greci, C. Rizzoli and P. Stipa, *Tetrahedron*, 2011, **67**, 6889.

**Regioisomeric ratios from  $^1\text{H}$ -NMR of the crude reaction mixtures and the isolated yields.**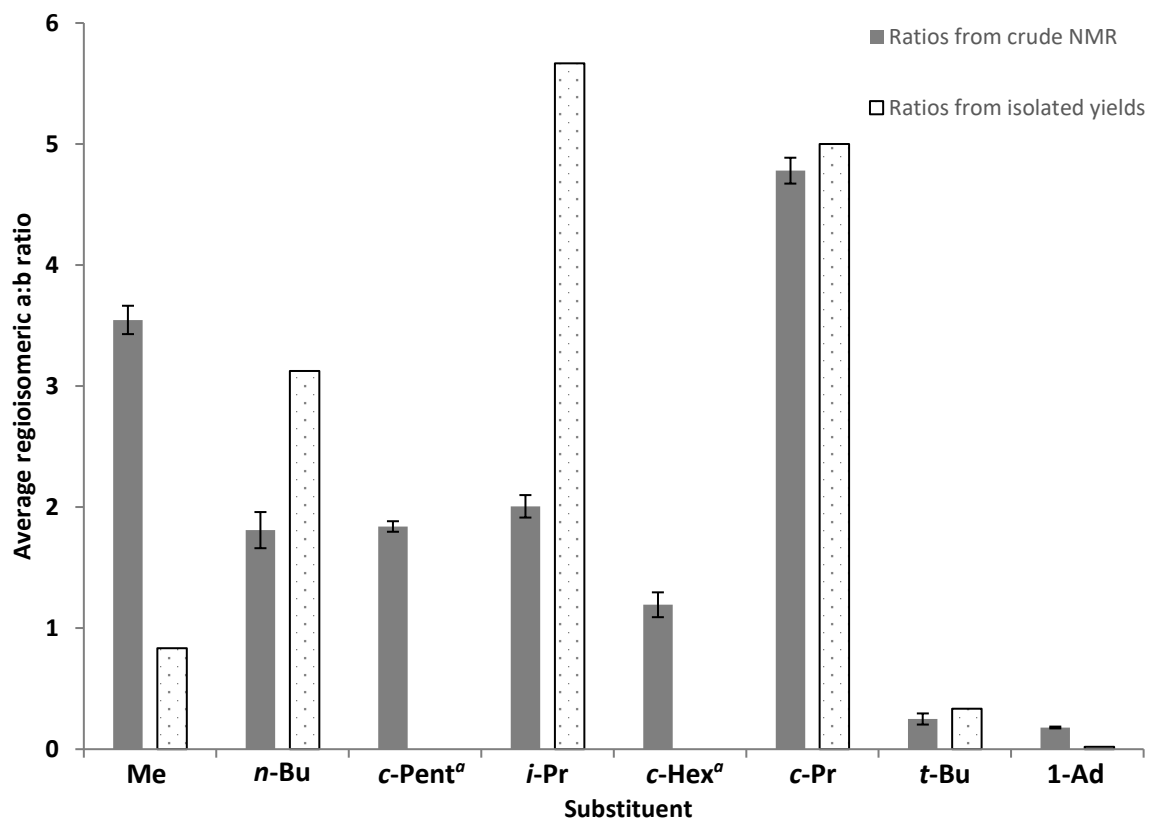

**Figure S1.** Correlation between substituent and average regioisomeric ratio determined by  $^1\text{H}$  NMR of crude reaction mixture and isolated yields.

<sup>a</sup>Only one regioisomer was purified to homogeneity.

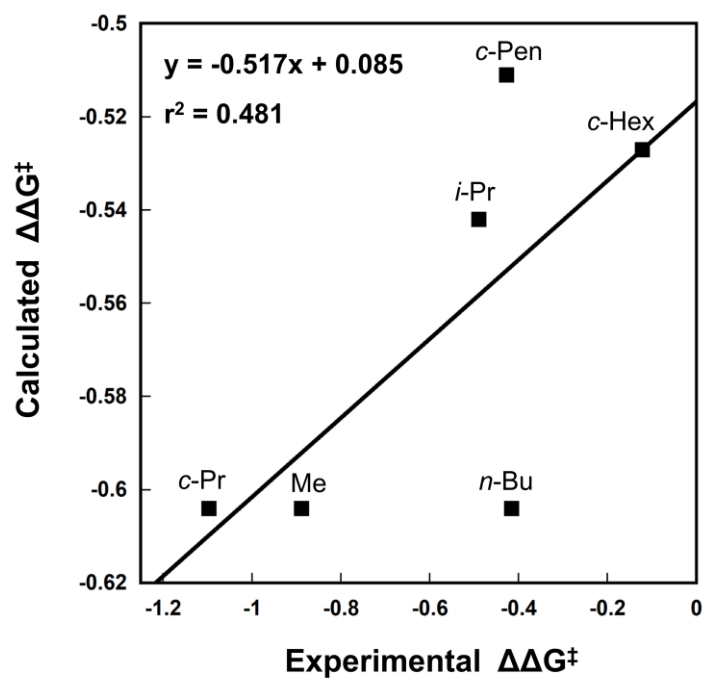

**Figure S2.** Correlation between predicted and experimental  $\Delta\Delta G^\ddagger$  (kcal/mol) without the *t*-Bu and 1-Ad groups

### Linear regression with wSterimol steric parameter

The Boltzmann-weighted Sterimol parameters (wSterimol) were obtained according to the protocol previously reported. (Brethomé, A. V.; Fletcher, S. P.; Paton, R. S. Conformational effects on physical-organic descriptors: The case of sterimol steric parameters. *ACS Catal.* **2019**, 2313-2323.) The calculated wB<sub>1</sub>, wB<sub>5</sub>, and wL are listed in **Table S1**.

**Table S1.** List of calculated wSterimol steric parameters utilized in the linear free energy relationship analysis.

| entry | R             | wSterimol       |                 |      |
|-------|---------------|-----------------|-----------------|------|
|       |               | wB <sub>1</sub> | wB <sub>5</sub> | wL   |
| 1     | Me            | 1.88            | 2.02            | 3.42 |
| 2     | <i>n</i> -Bu  | 1.88            | 4.66            | 6.08 |
| 3     | <i>c</i> -Pen | 1.94            | 3.60            | 5.71 |
| 4     | <i>i</i> -Pr  | 1.92            | 3.18            | 4.57 |
| 5     | <i>c</i> -Hex | 1.93            | 3.50            | 6.66 |
| 6     | <i>c</i> -Pr  | 1.88            | 3.26            | 4.57 |
| 7     | <i>t</i> -Bu  | 2.76            | 3.19            | 4.55 |
| 8     | 1-Ad          | 3.17            | 3.51            | 6.63 |

Subsequently, the model was constructed from the  $\Delta\Delta G^\ddagger$  (Estimated at 353.15 K (80 °C),  $\Delta\Delta G^\ddagger = -RT \ln(\mathbf{a/b})$ ,  $R = 0.001986 \text{ kcal K}^{-1} \text{ mol}^{-1}$ ) and the wSterimol parameters using Matlab™ software with statistics toolbox to perform the stepwise linear regression. Matrices **X** and **Y** (**Table S2**) were submitted to the Matlab™ software using **X** = [Matrix **X**] and **Y** = [Matrix **Y**] notations. (**Note:** X1 = wB<sub>1</sub>, X2 = wB<sub>5</sub>, and X3 = wL)

**Table S2.** Matrix formatting for the stepwise linear regression.

| Y Group        | Matrix X |      |      | Matrix Y |
|----------------|----------|------|------|----------|
|                | X1       | X2   | X3   |          |
| Me             | 1.88     | 2.02 | 3.42 | -0.889   |
| <i>n</i> -Bu   | 1.88     | 4.66 | 6.08 | -0.416   |
| <i>c</i> -Pent | 1.94     | 3.60 | 5.71 | -0.428   |
| <i>i</i> -Pr   | 1.92     | 3.18 | 4.57 | -0.490   |
| <i>c</i> -Hex  | 1.93     | 3.50 | 6.66 | -0.122   |
| <i>c</i> -Pr   | 1.88     | 3.26 | 4.57 | -1.097   |
| <i>t</i> -Bu   | 2.76     | 3.19 | 4.55 | 0.972    |
| 1-Ad           | 3.17     | 3.51 | 6.63 | 1.203    |

Next, the stepwise solver was initiated using the command “stepwise(X,Y)”, this command produced the prompt window shown in **Figure S3a**.

**Figure S3a.** The stepwise regression prompt.

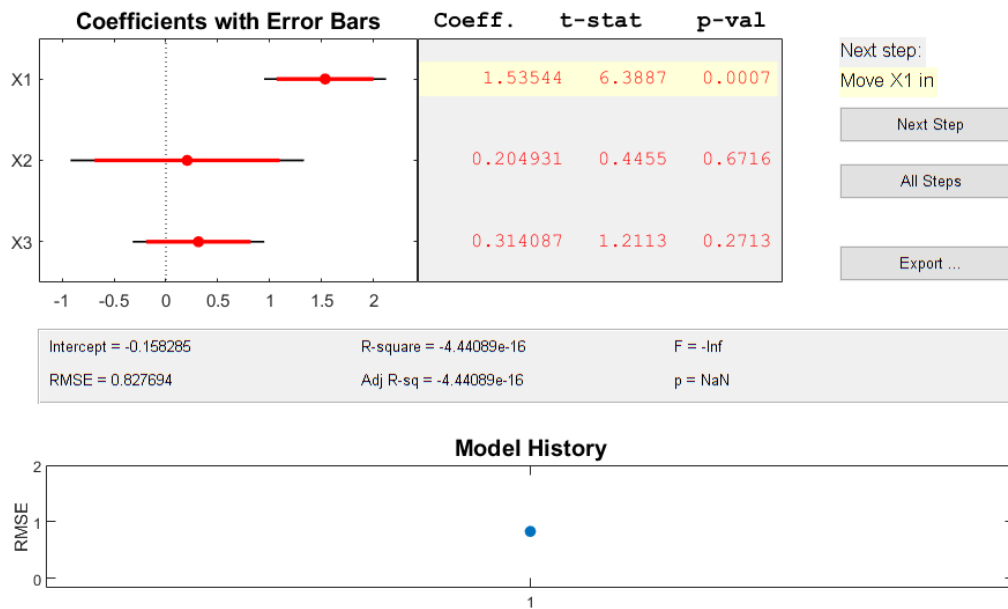

By clicking *All-Steps* button in the upper right box, the final iteration for regression is completed, as shown in **Figure S3b**.

**Figure S3b.** Final iteration in the stepwise regression.

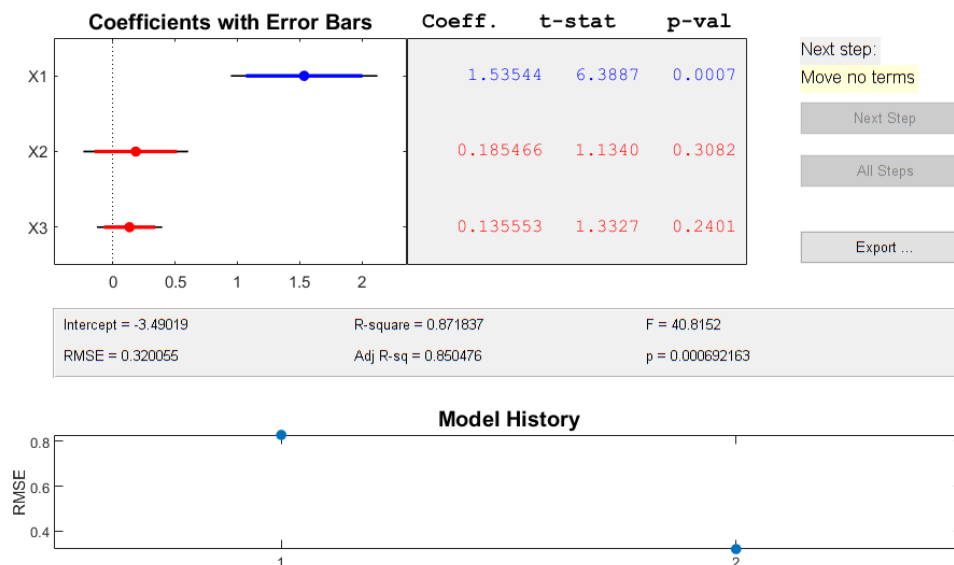

Finally, the model was obtained together with its statistic parameters, as shown in equation 1.

$$\Delta\Delta G^\ddagger = -3.49019 + 1.53544wB_1 \quad (1)$$

$$R^2 = 0.872, RMSE = 0.320, F = 40.82, p = 0.00069, q^2 = 0.748,$$

$$(R^2 - R_0^2)/R^2 = -0.147, k = 1.000$$

The regioselectivity of the Larock heteroannulation reaction was then predicted, as demonstrated in **Table S3**.

**Table S3.** Experimental values compared to predicted values from equation 1 for the regioselectivity of the Larock reaction.

| Entry | R              | estimated $\Delta\Delta G^\ddagger$ | predicted $\Delta\Delta G^\ddagger$ |
|-------|----------------|-------------------------------------|-------------------------------------|
| 1     | Me             | -0.889                              | -0.604                              |
| 2     | <i>n</i> -Bu   | -0.416                              | -0.604                              |
| 3     | <i>c</i> -Pent | -0.428                              | -0.511                              |
| 4     | <i>i</i> -Pr   | -0.490                              | -0.542                              |
| 5     | <i>c</i> -Hex  | -0.122                              | -0.527                              |
| 6     | <i>c</i> -Pr   | -1.097                              | -0.604                              |
| 7     | <i>t</i> -Bu   | 0.972                               | 0.748                               |
| 8     | 1-Ad           | 1.203                               | 1.377                               |

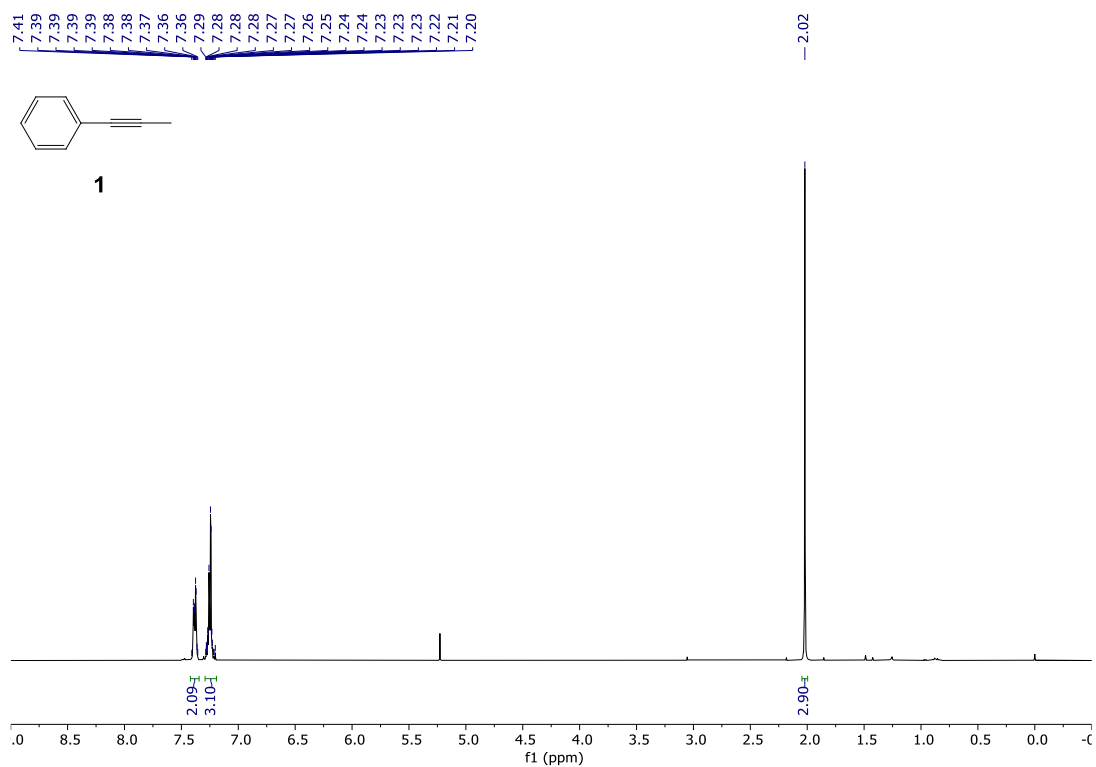

**Figure S4.**  $^1\text{H}$  NMR spectrum (400 MHz) of prop-1-yn-1-ylbenzene (**1**) in  $\text{CDCl}_3$

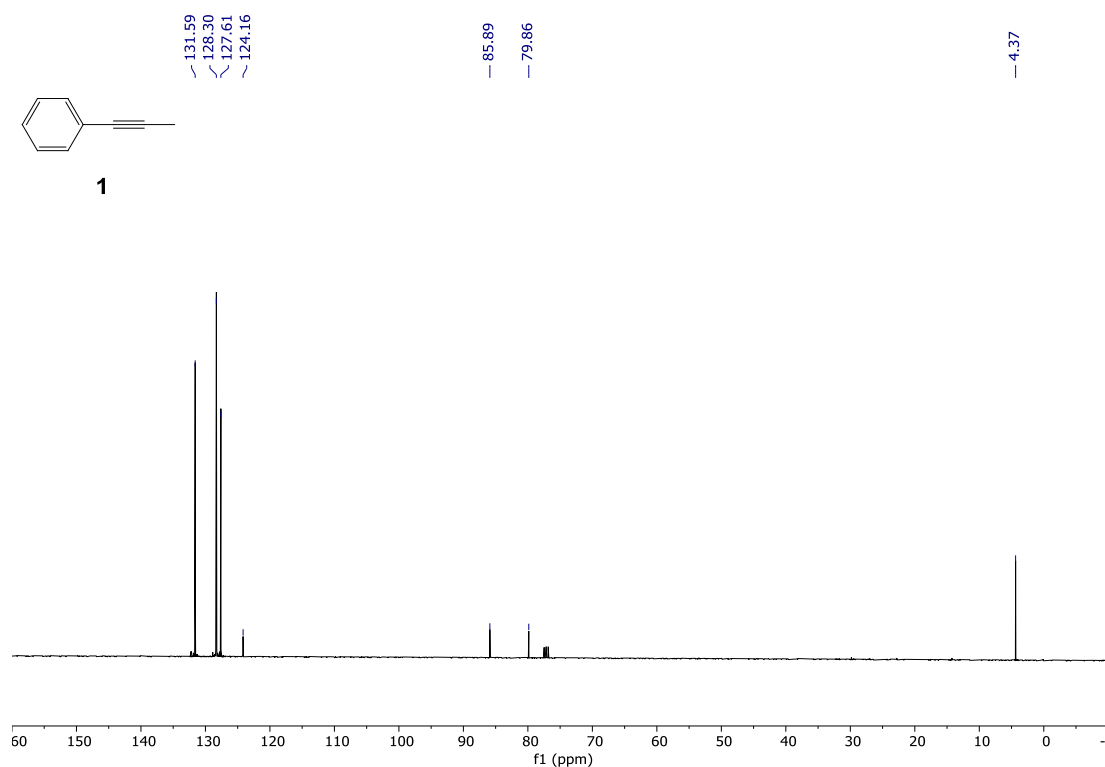

**Figure S5.**  $^{13}\text{C}\{^1\text{H}\}$  NMR spectrum (100 MHz) of prop-1-yn-1-ylbenzene (**1**) in  $\text{CDCl}_3$



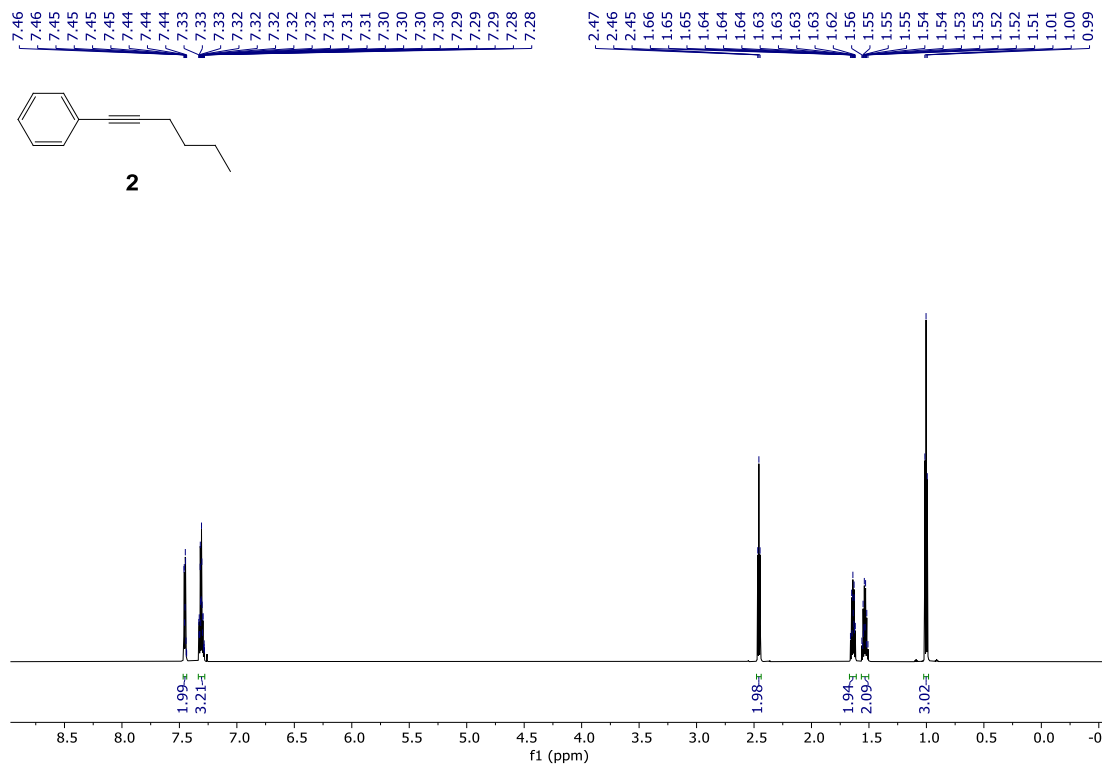

**Figure S6.** <sup>1</sup>H NMR spectrum (700 MHz) of hex-1-yn-1-ylbenzene (**2**) in CDCl<sub>3</sub>

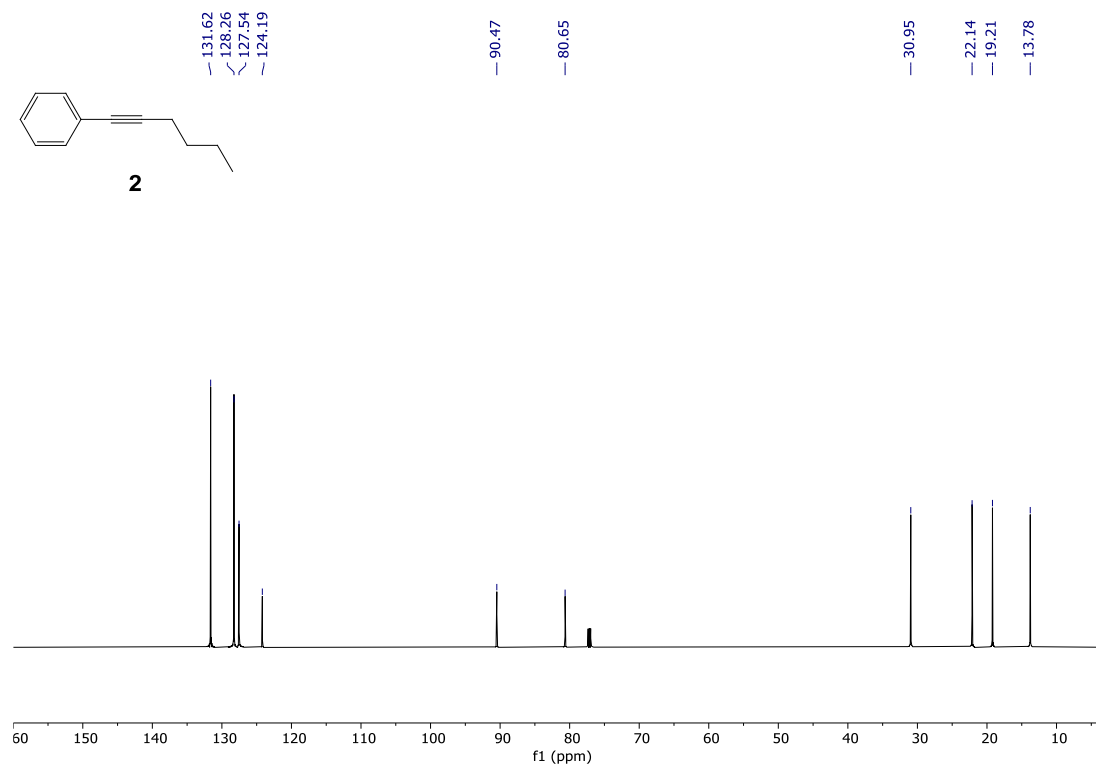

**Figure S7.** <sup>13</sup>C {<sup>1</sup>H} NMR spectrum (175 MHz) of hex-1-yn-1-ylbenzene (**2**) in CDCl<sub>3</sub>

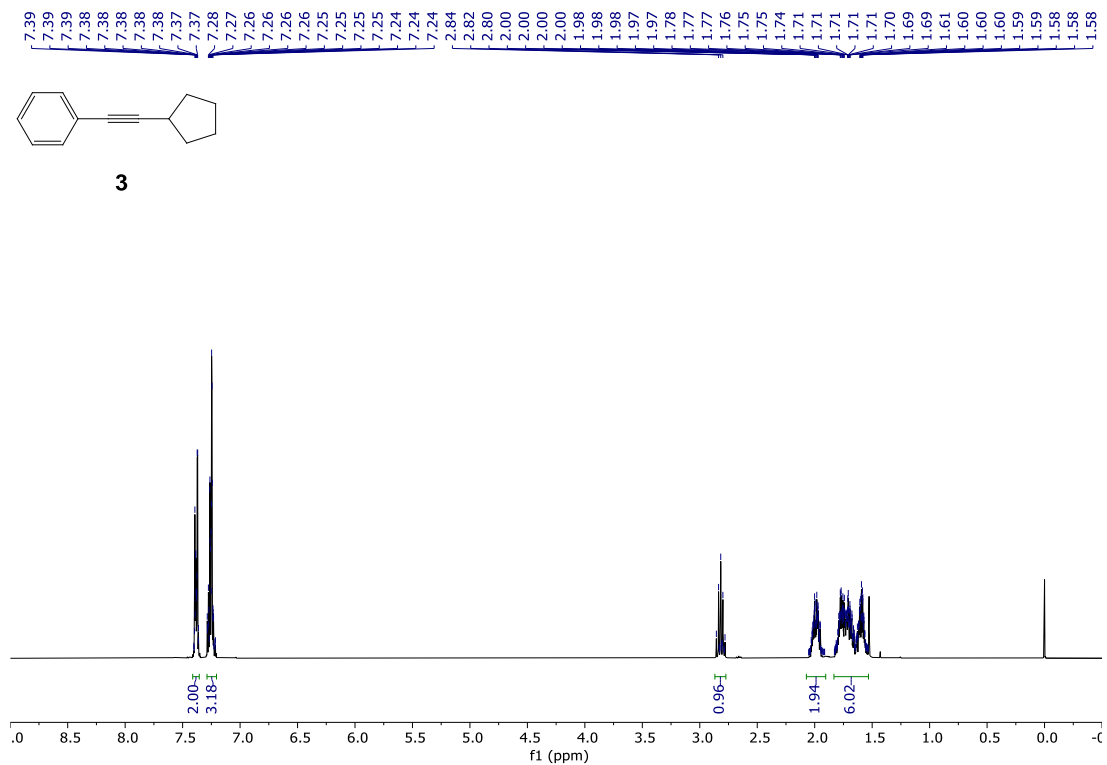

**Figure S8.**  $^1\text{H}$  NMR spectrum (400 MHz) of (cyclopentylethynyl)benzene (**3**) in  $\text{CDCl}_3$

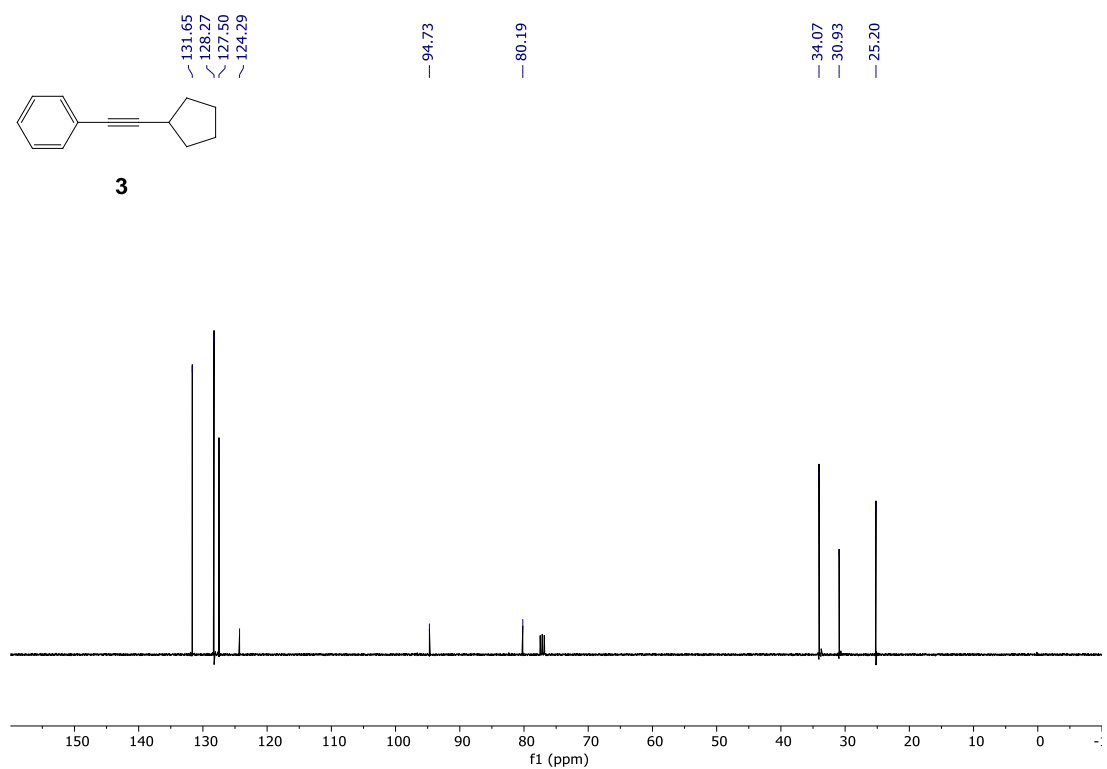

**Figure S9.**  $^{13}\text{C}\{^1\text{H}\}$  NMR spectrum (100 MHz) of (cyclopentylethynyl)benzene (**3**) in  $\text{CDCl}_3$

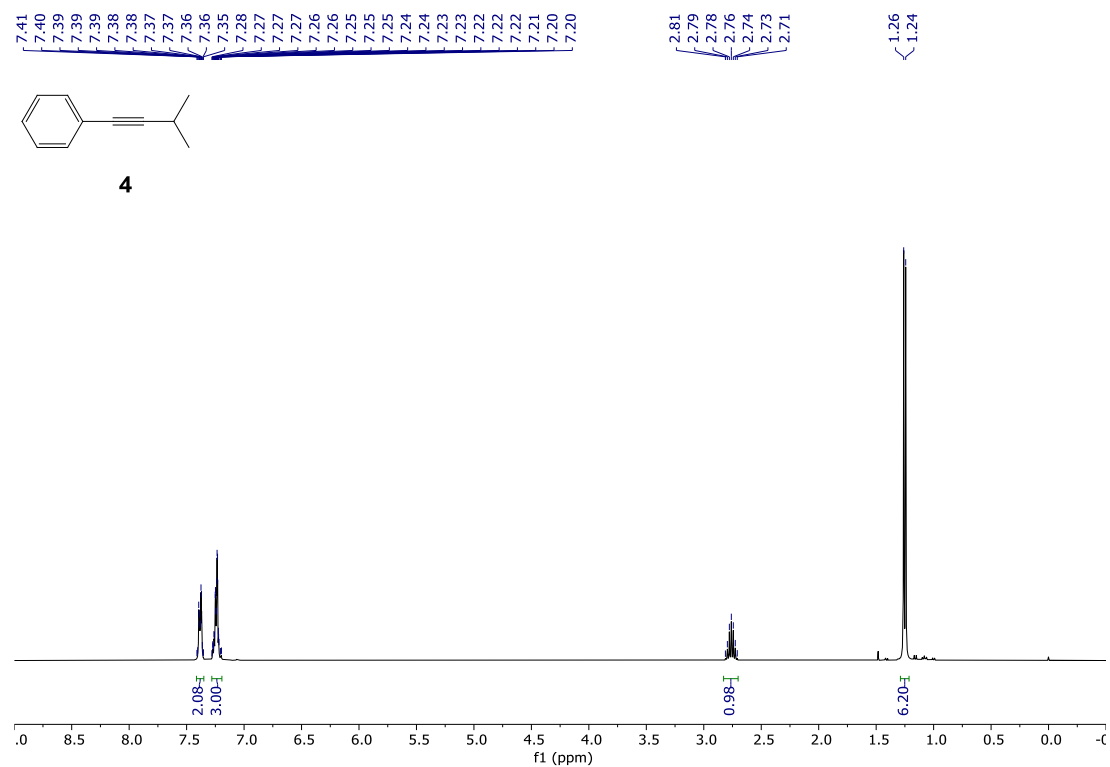

**Figure S10.**  $^1\text{H}$  NMR spectrum (400 MHz) of (3-methylbut-1-yn-1-yl)benzene (**4**) in  $\text{CDCl}_3$

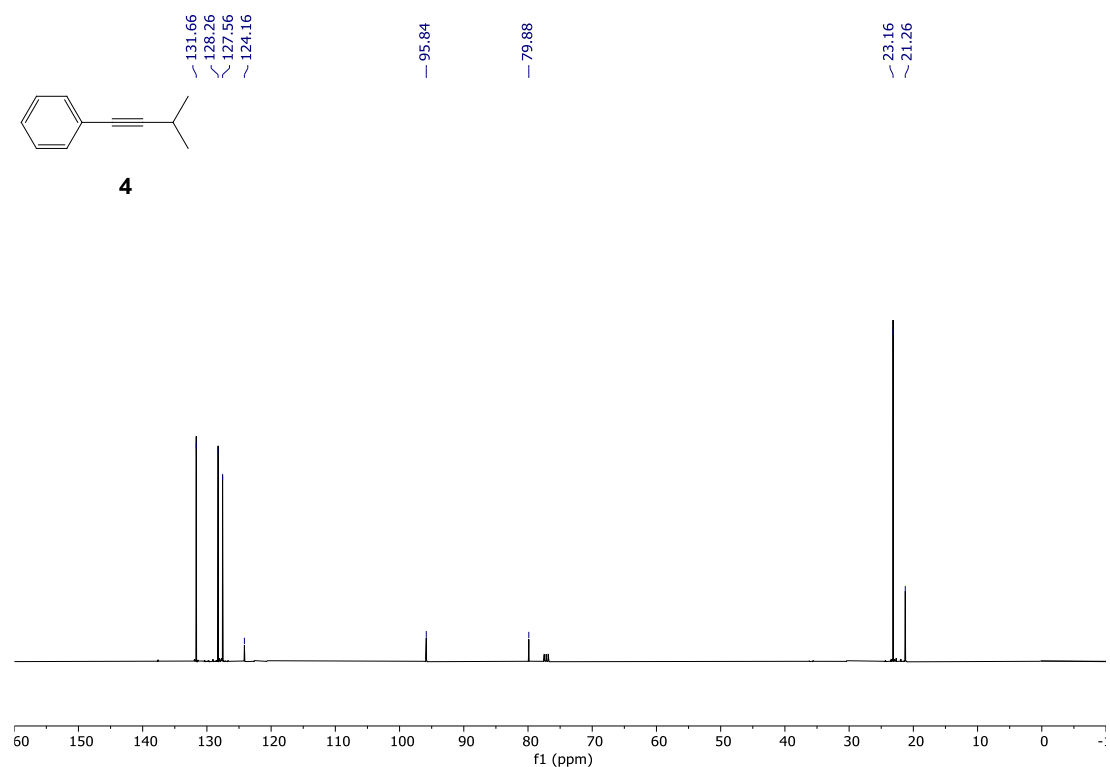

**Figure S11.**  $^{13}\text{C}\{^1\text{H}\}$  NMR spectrum (100 MHz) of (3-methylbut-1-yn-1-yl)benzene (**4**) in  $\text{CDCl}_3$

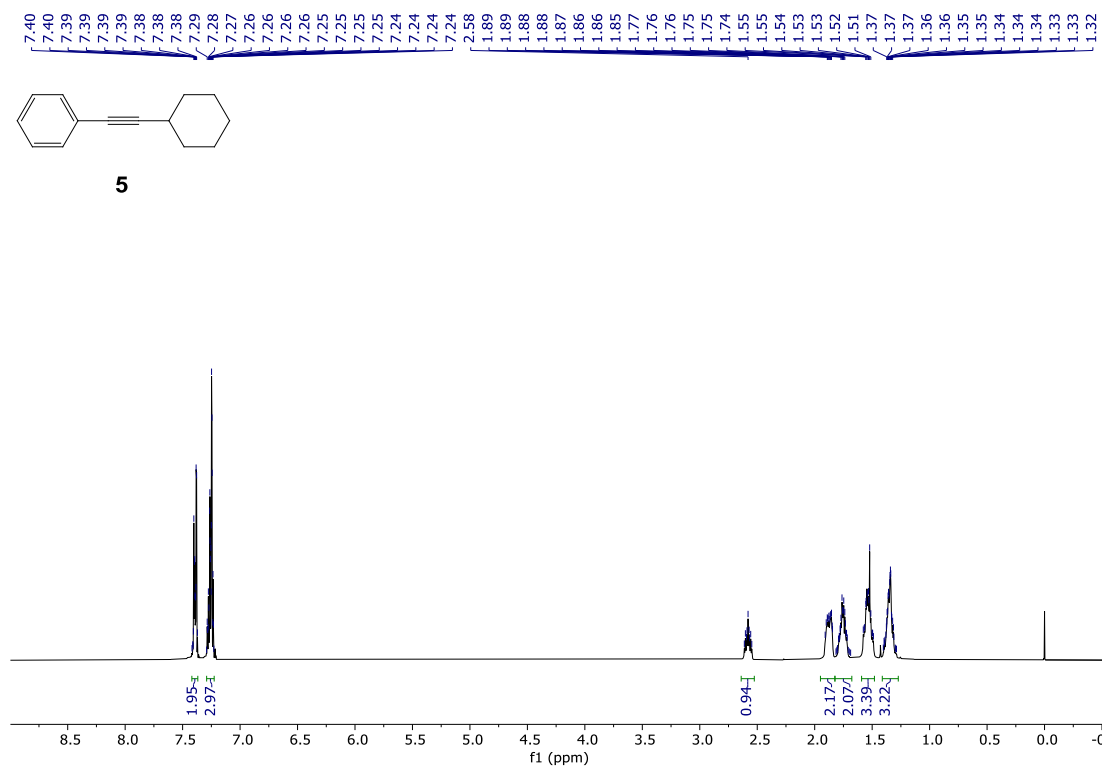

**Figure S12.**  $^1\text{H}$  NMR spectrum (400 MHz) of (cyclohexylethynyl)benzene (**5**) in  $\text{CDCl}_3$

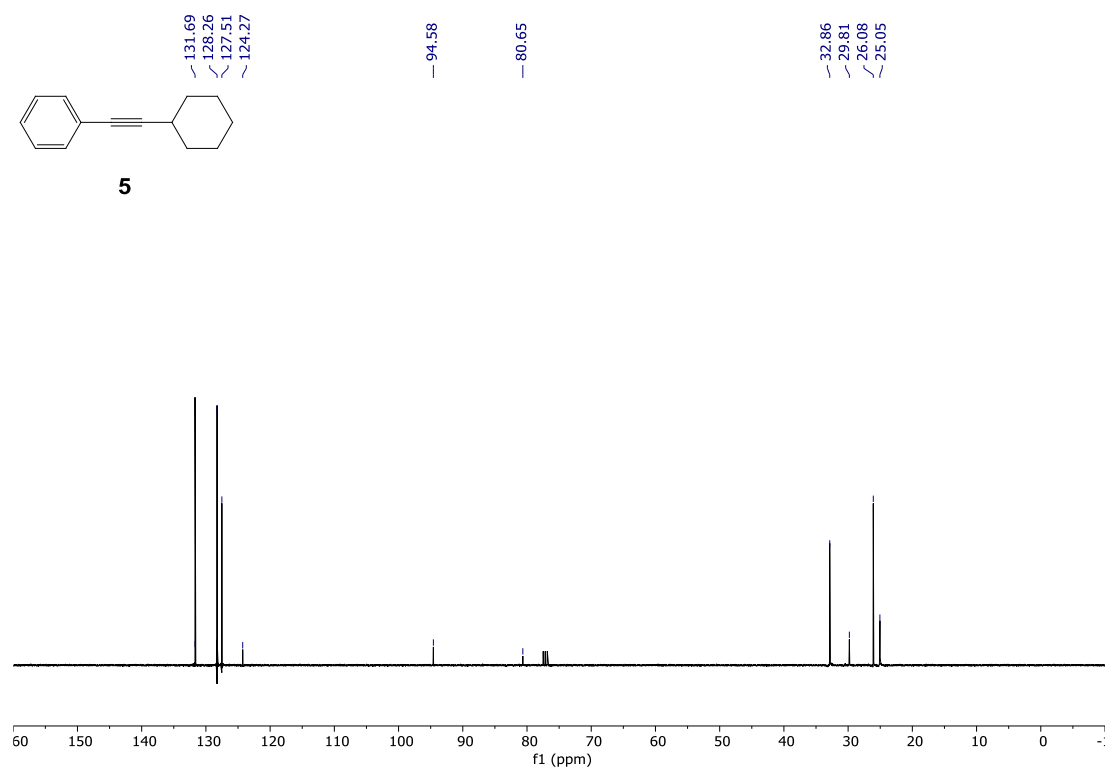

**Figure S13.**  $^{13}\text{C}\{^1\text{H}\}$  NMR spectrum (100 MHz) of (cyclohexylethynyl)benzene (**5**) in  $\text{CDCl}_3$

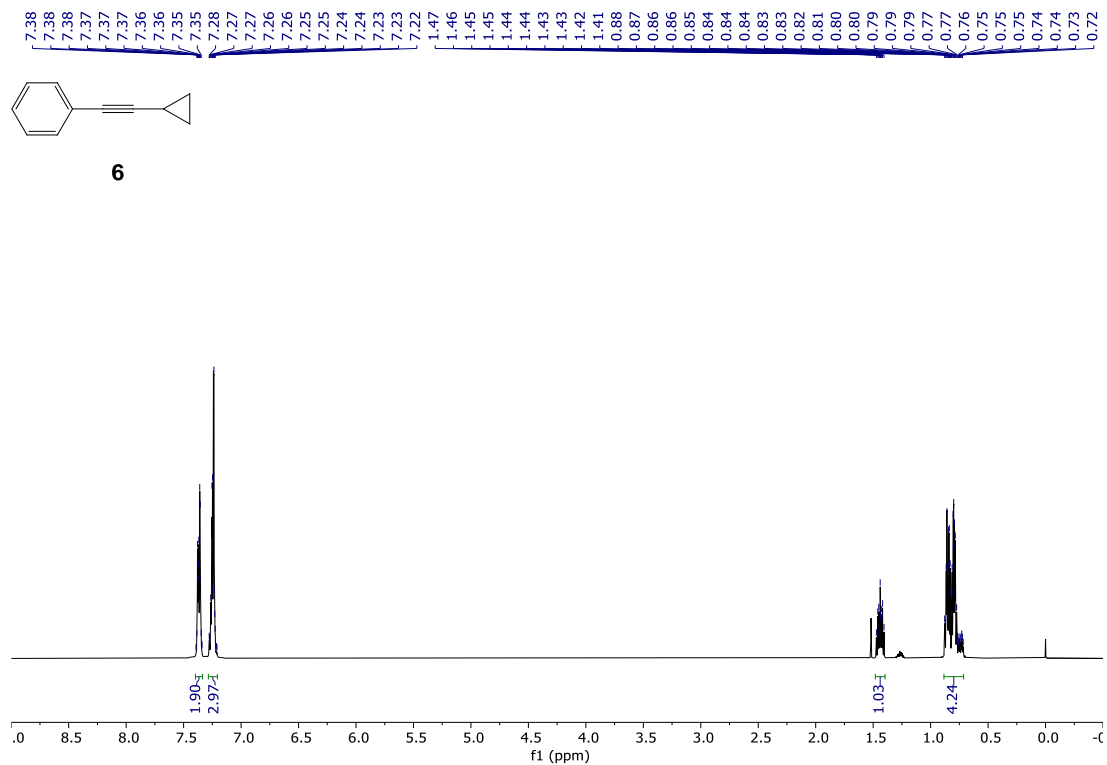

**Figure S14.** <sup>1</sup>H NMR spectrum (400 MHz) of (cyclopropylethynyl)benzene (**6**) in CDCl<sub>3</sub>

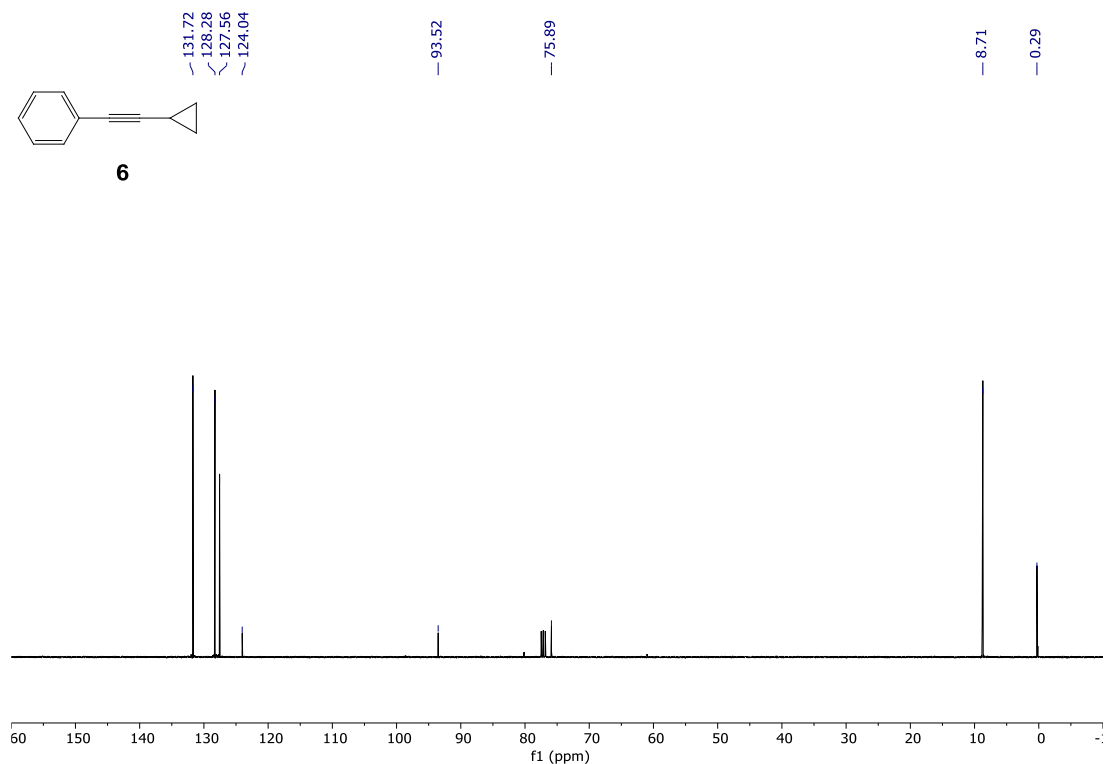

**Figure S15.** <sup>13</sup>C{<sup>1</sup>H} NMR spectrum (100 MHz) of (cyclopropylethynyl)benzene (**6**) in CDCl<sub>3</sub>

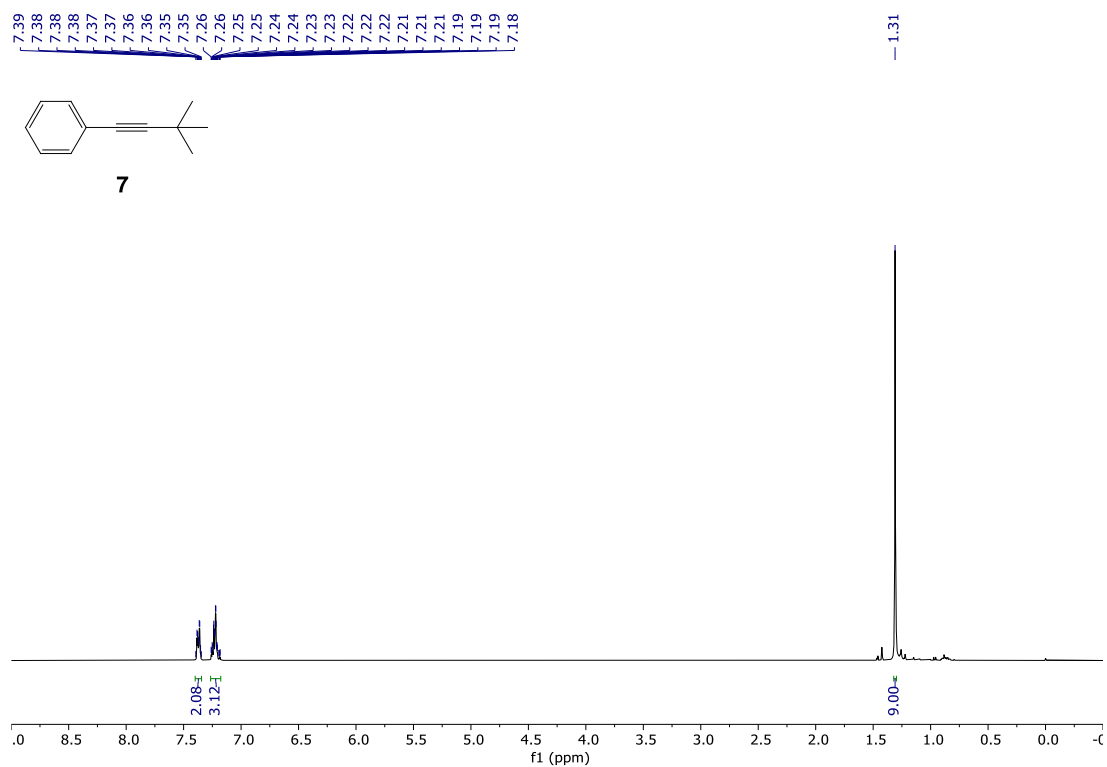

**Figure S16.**  $^1\text{H}$  NMR spectrum (400 MHz) of (3,3-dimethylbut-1-yn-1-yl)benzene (7) in  $\text{CDCl}_3$

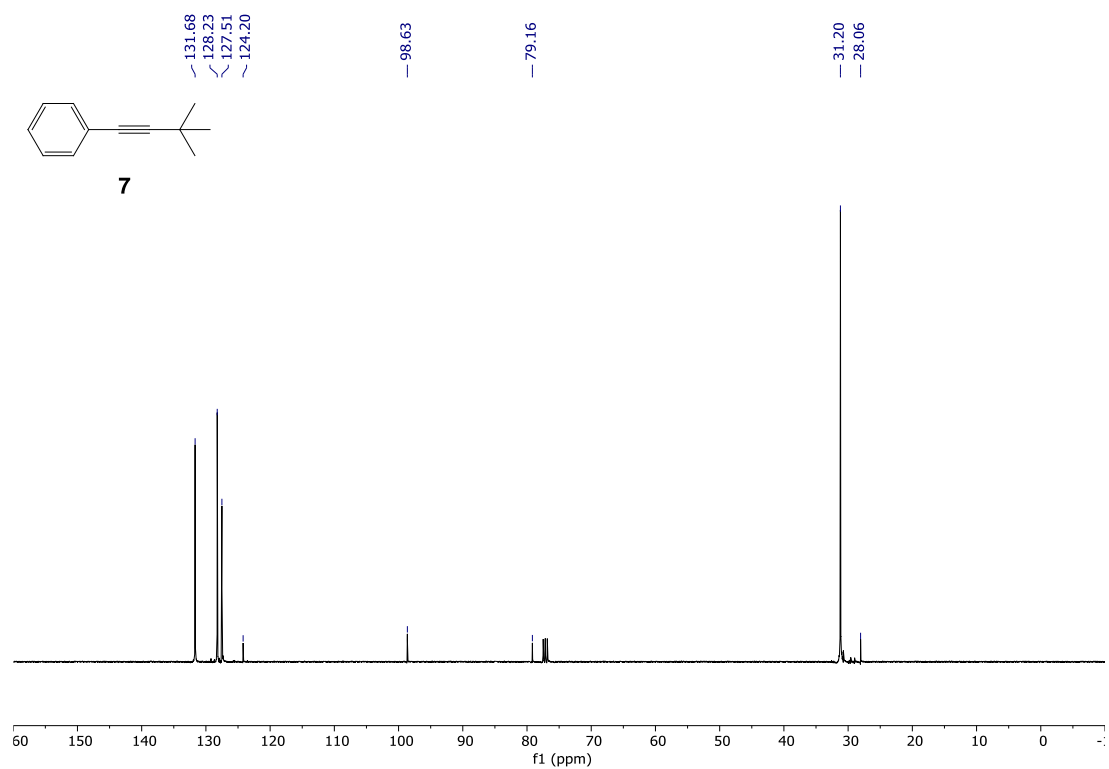

**Figure S17.**  $^{13}\text{C}\{^1\text{H}\}$  NMR spectrum (100 MHz) of (3,3-dimethylbut-1-yn-1-yl)benzene (7) in  $\text{CDCl}_3$

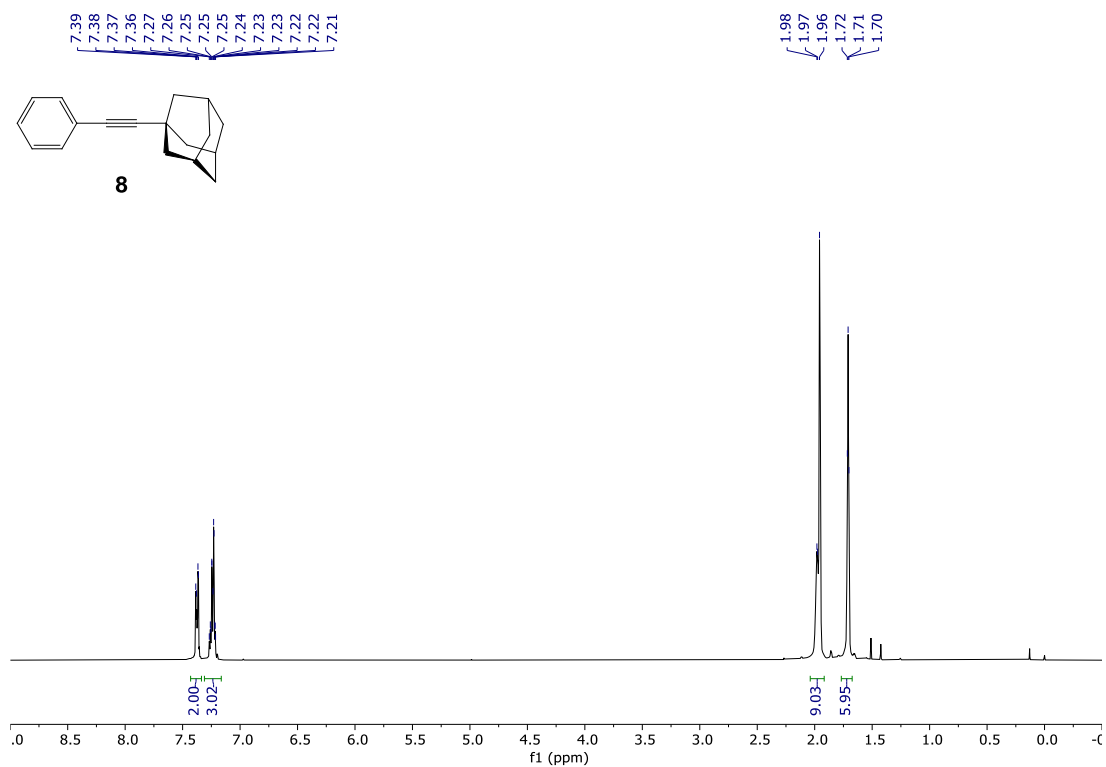

**Figure S18.**  $^1\text{H}$  NMR spectrum (400 MHz) of 1-(phenylethynyl)adamantane (**8**) in  $\text{CDCl}_3$

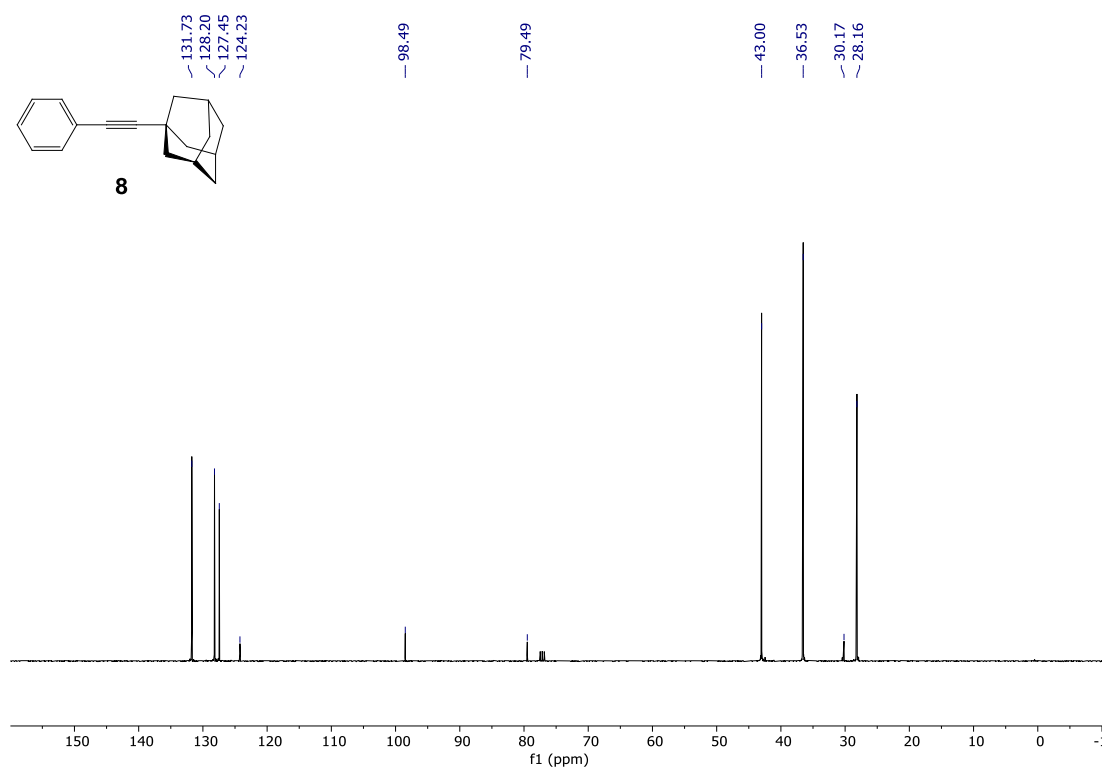

**Figure S19.**  $^{13}\text{C}\{^1\text{H}\}$  NMR spectrum (100 MHz) of 1-(phenylethynyl)adamantane (**8**) in  $\text{CDCl}_3$

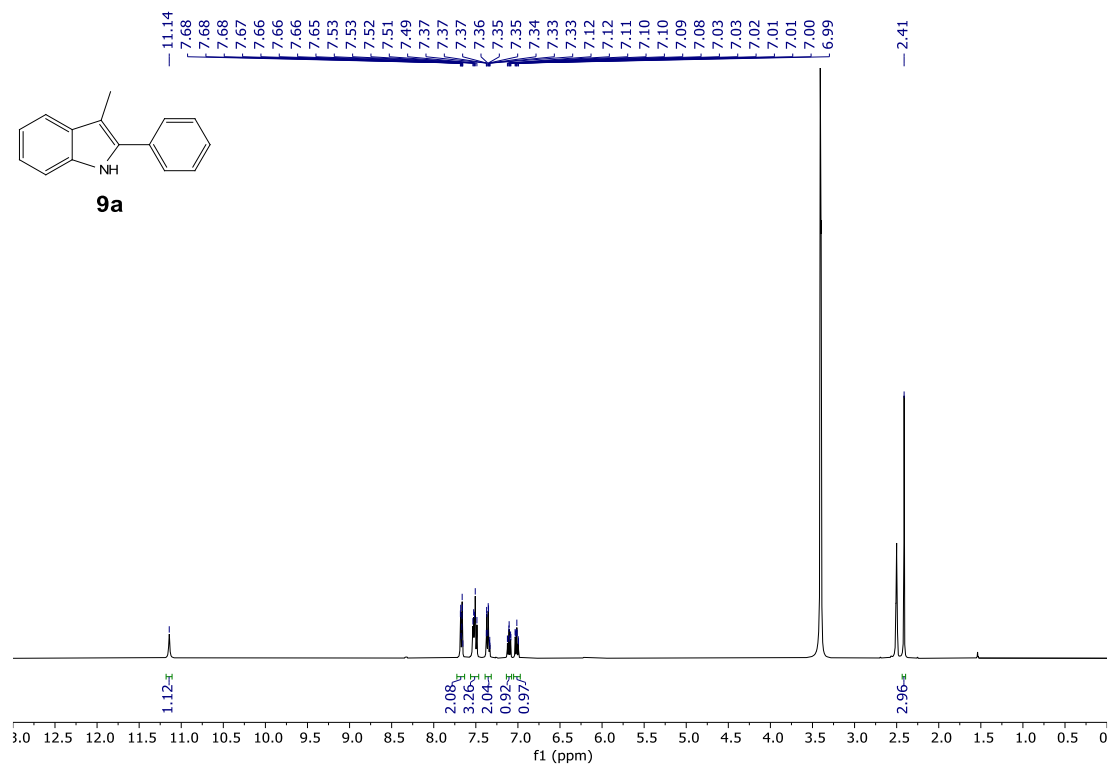

**Figure S20.**  $^1\text{H}$  NMR spectrum (400 MHz) of 3-methyl-2-phenyl-1H-indole (9a) in DMSO- $d_6$

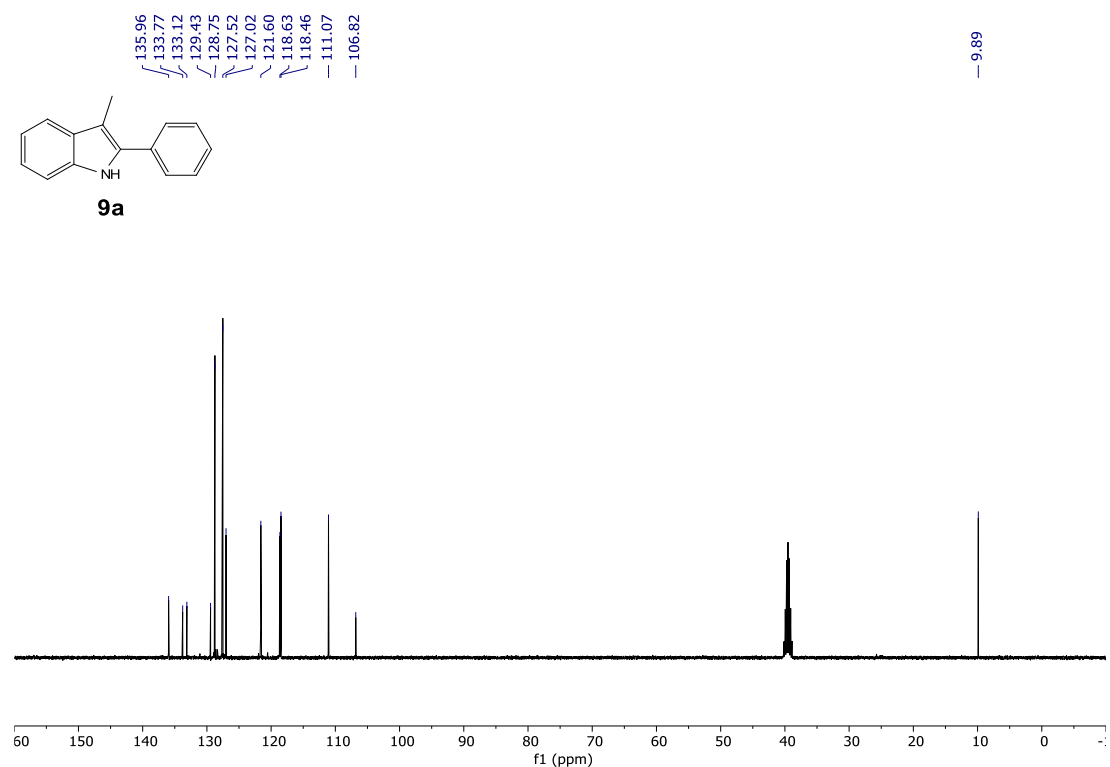

**Figure S21.**  $^{13}\text{C}\{^1\text{H}\}$  NMR spectrum (100 MHz) of 3-methyl-2-phenyl-1H-indole (9a) in DMSO- $d_6$



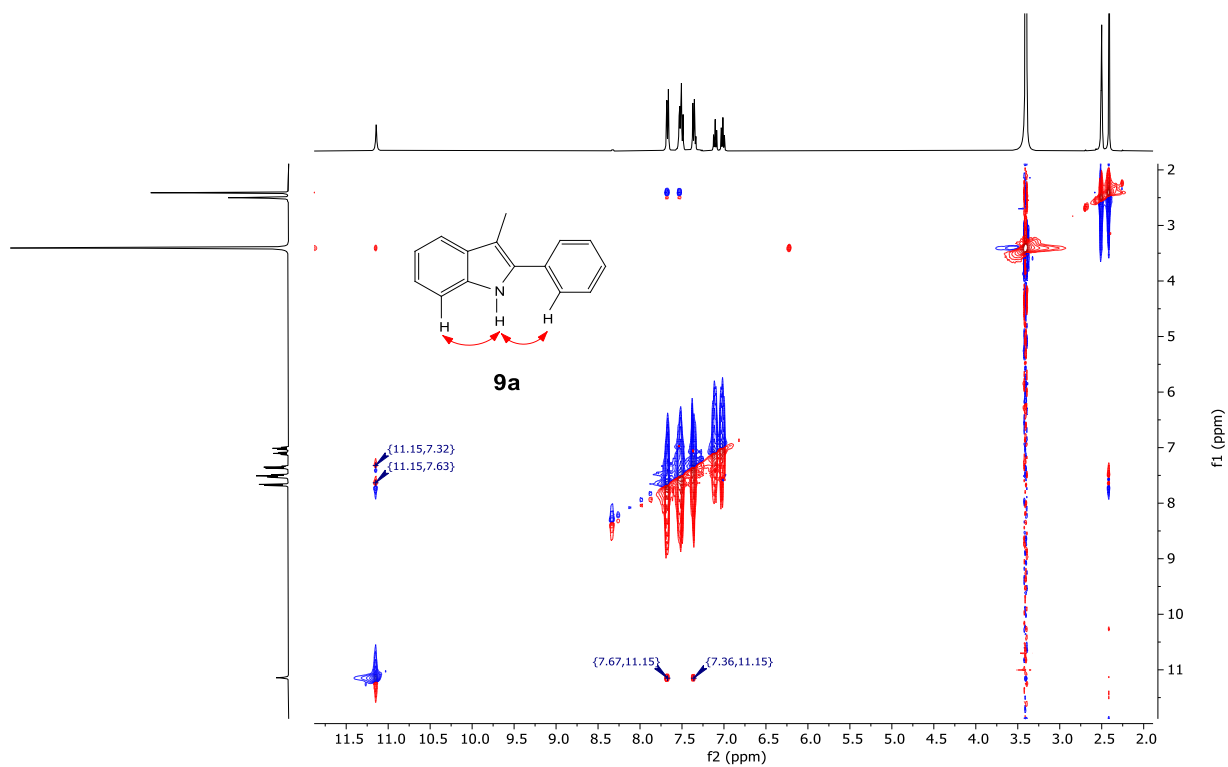

**Figure S22.** NOESY spectrum of 3-methyl-2-phenyl-1H-indole (**9a**) in DMSO- $d_6$

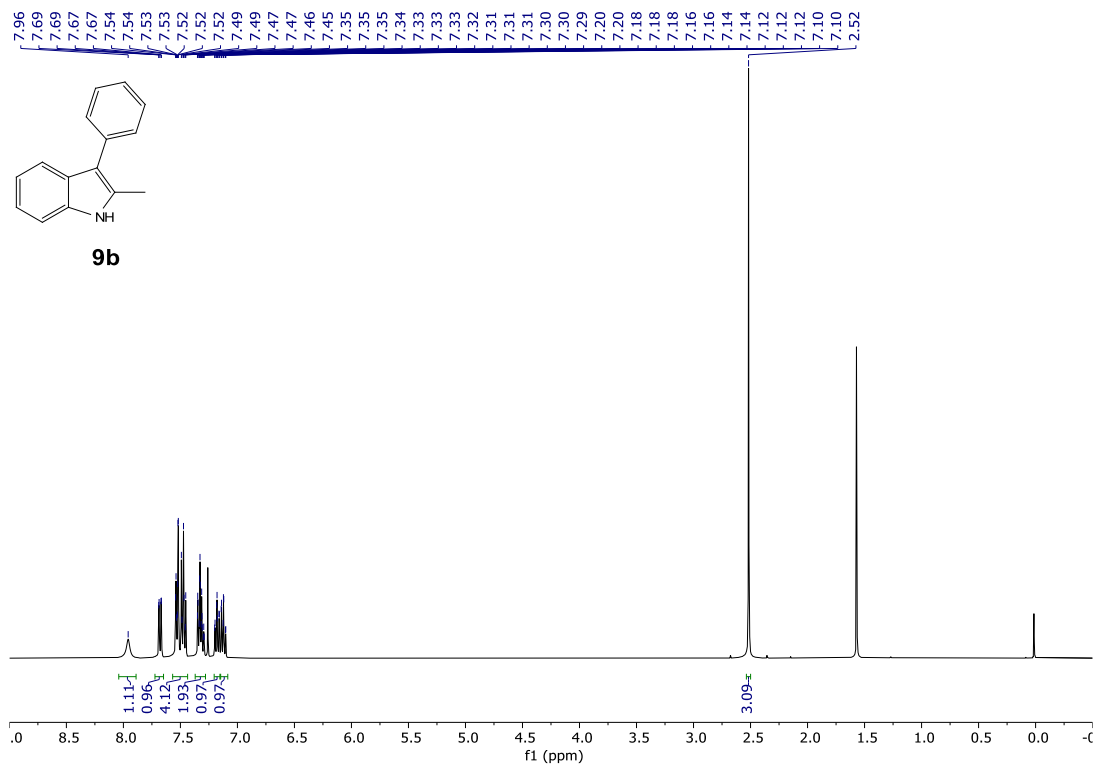

**Figure S23.**  $^1\text{H}$  NMR spectrum (400 MHz) of 2-methyl-3-phenyl-1*H*-indole (**9b**) in  $\text{CDCl}_3$

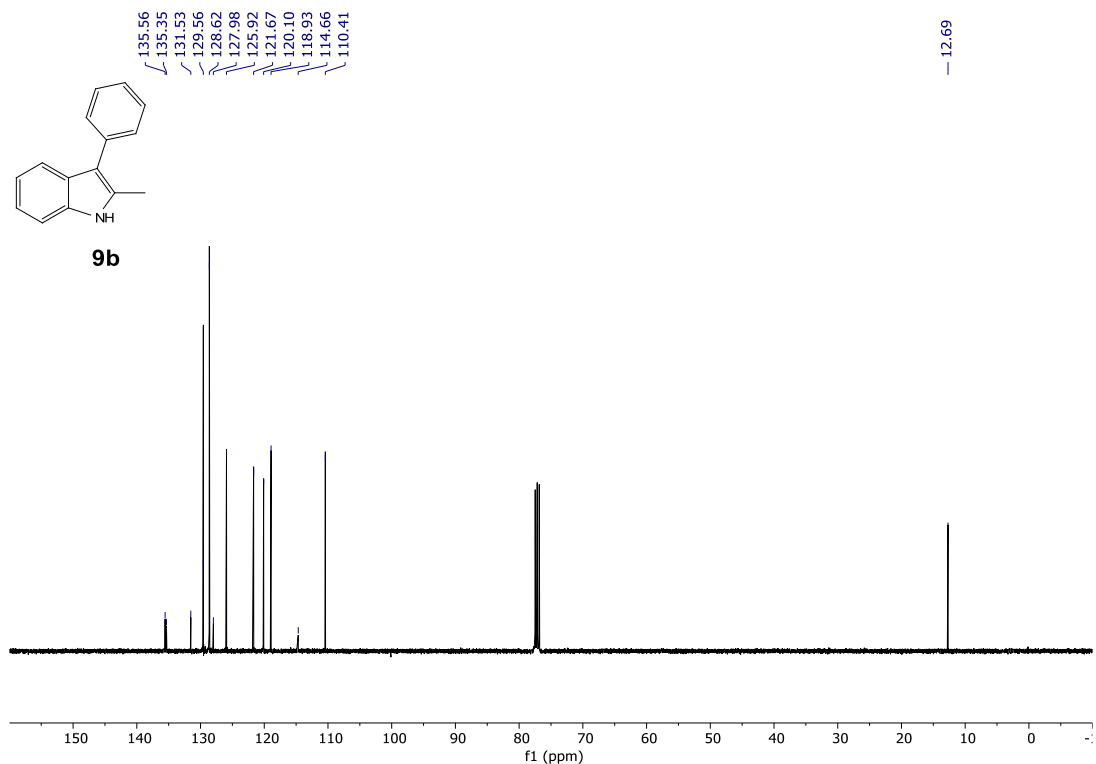

**Figure S24.**  $^{13}\text{C}\{^1\text{H}\}$  NMR spectrum (100 MHz) of 2-methyl-3-phenyl-1*H*-indole (**9b**) in  $\text{CDCl}_3$

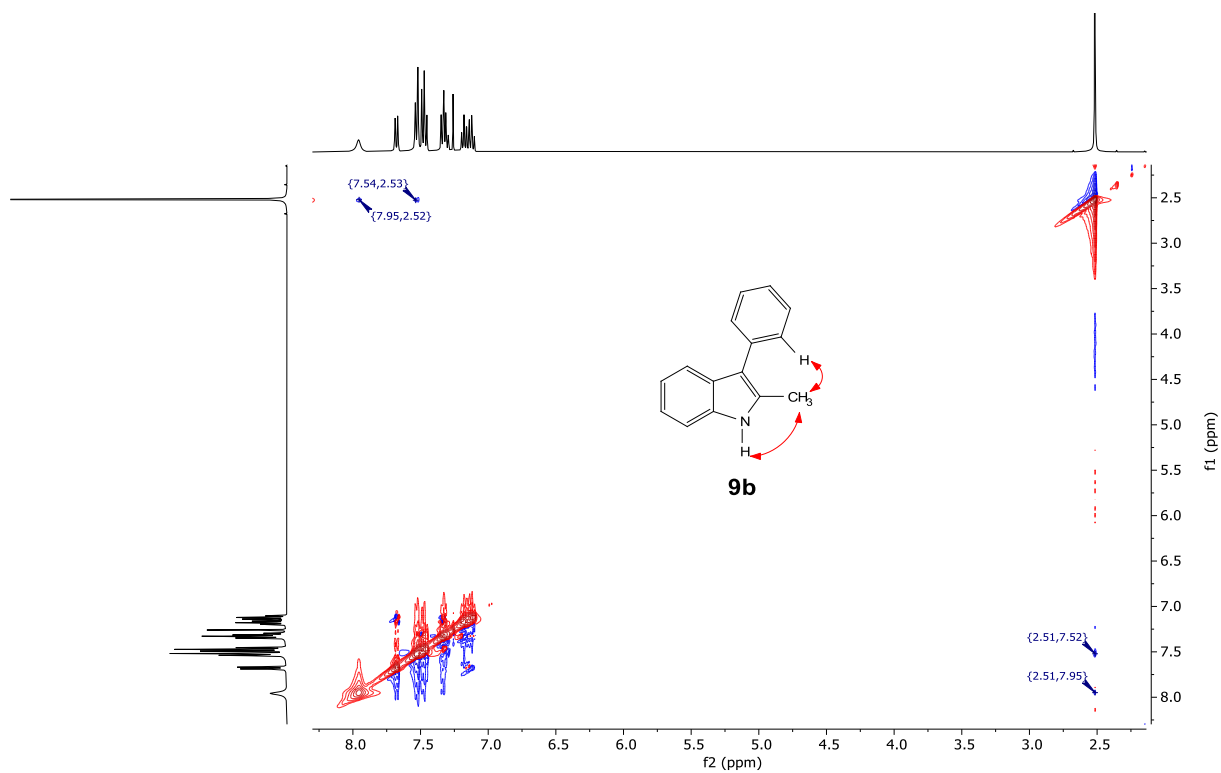

**Figure S25.** NOESY spectrum of 2-methyl-3-phenyl-1H-indole (**9b**) in CDCl<sub>3</sub>

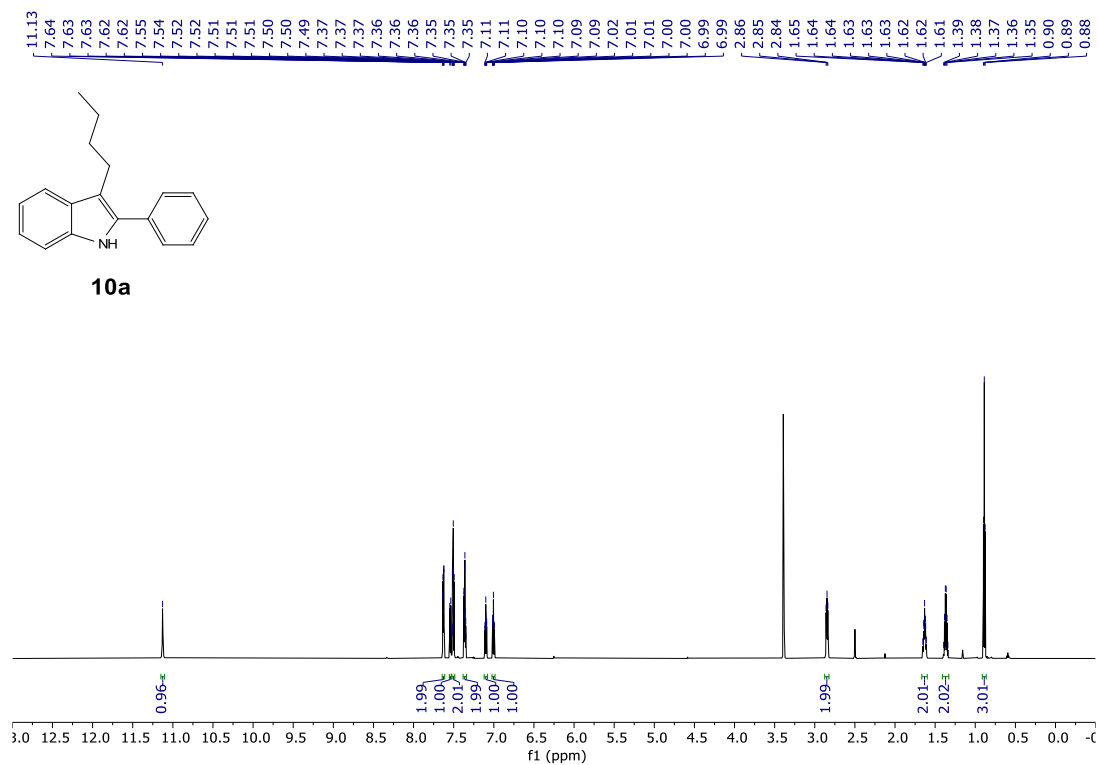

**Figure S26.** <sup>1</sup>H NMR spectrum (700 MHz) of 3-butyl-2-phenyl-1H-indole (10a) in DMSO-*d*<sub>6</sub>

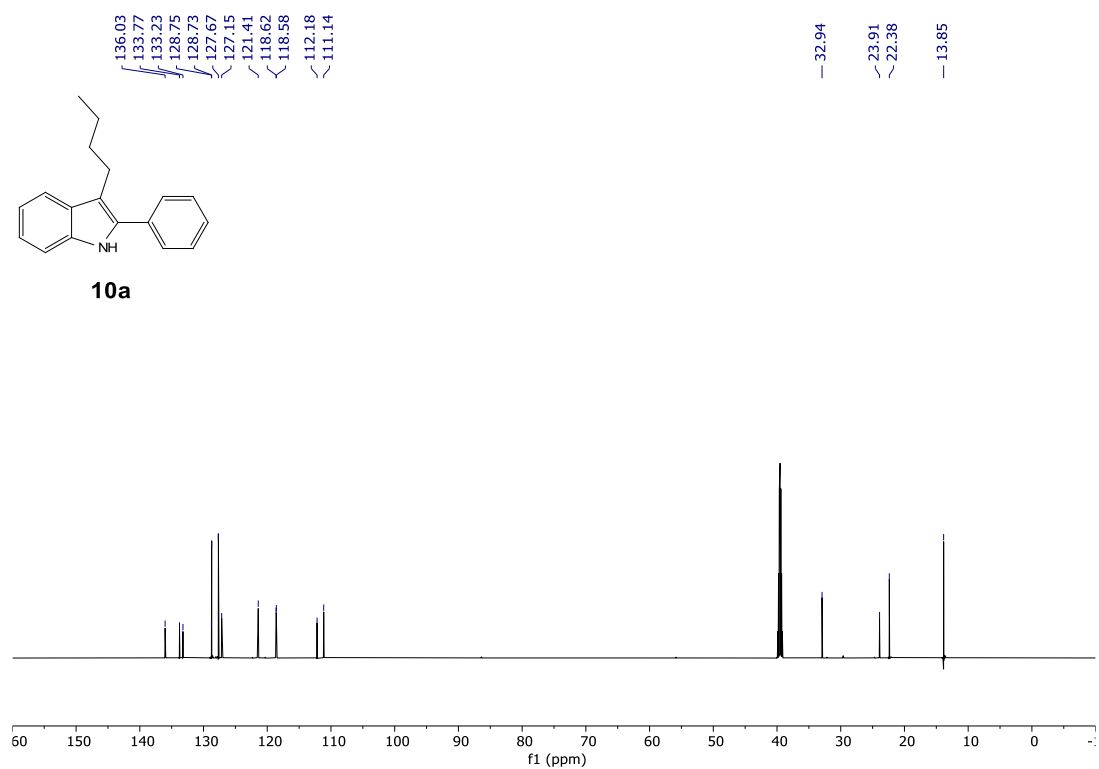

**Figure S27.** <sup>13</sup>C{<sup>1</sup>H} NMR spectrum (175 MHz) of 3-butyl-2-phenyl-1H-indole (10a) in DMSO-*d*<sub>6</sub>

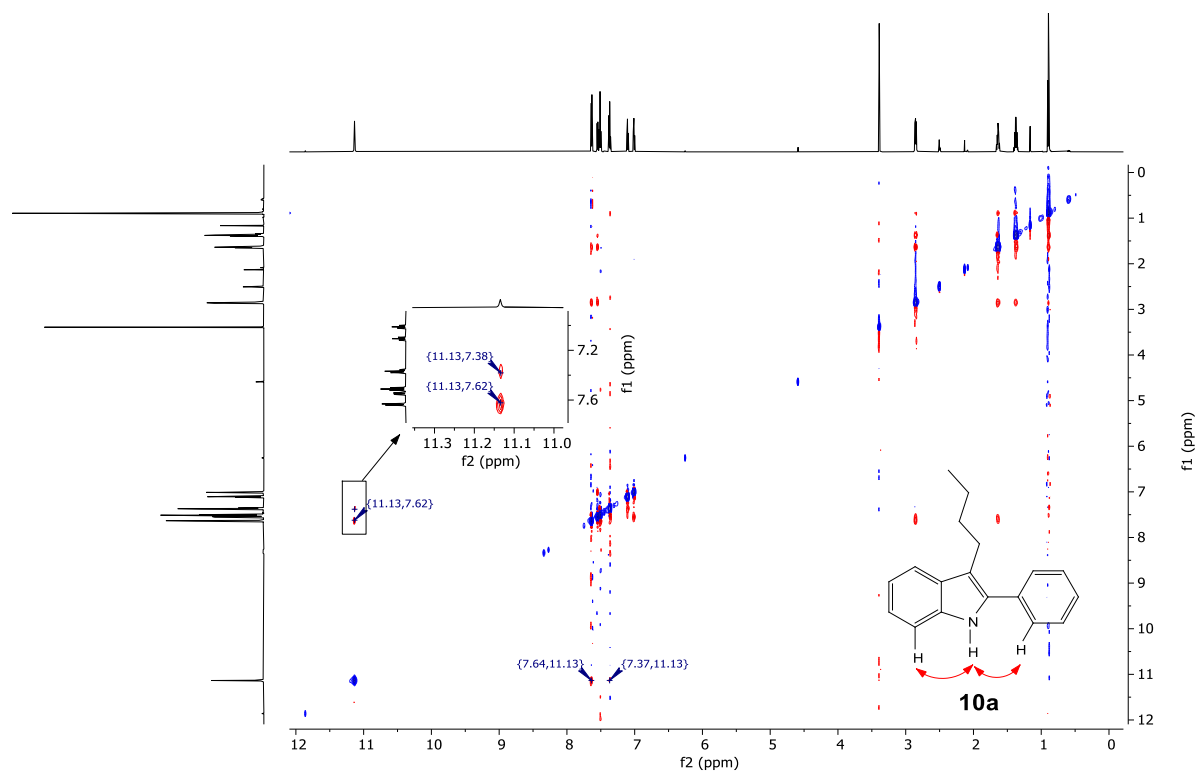

**Figure S28.** NOESY spectrum of 3-butyl-2-phenyl-1*H*-indole (**10a**) in DMSO- $d_6$

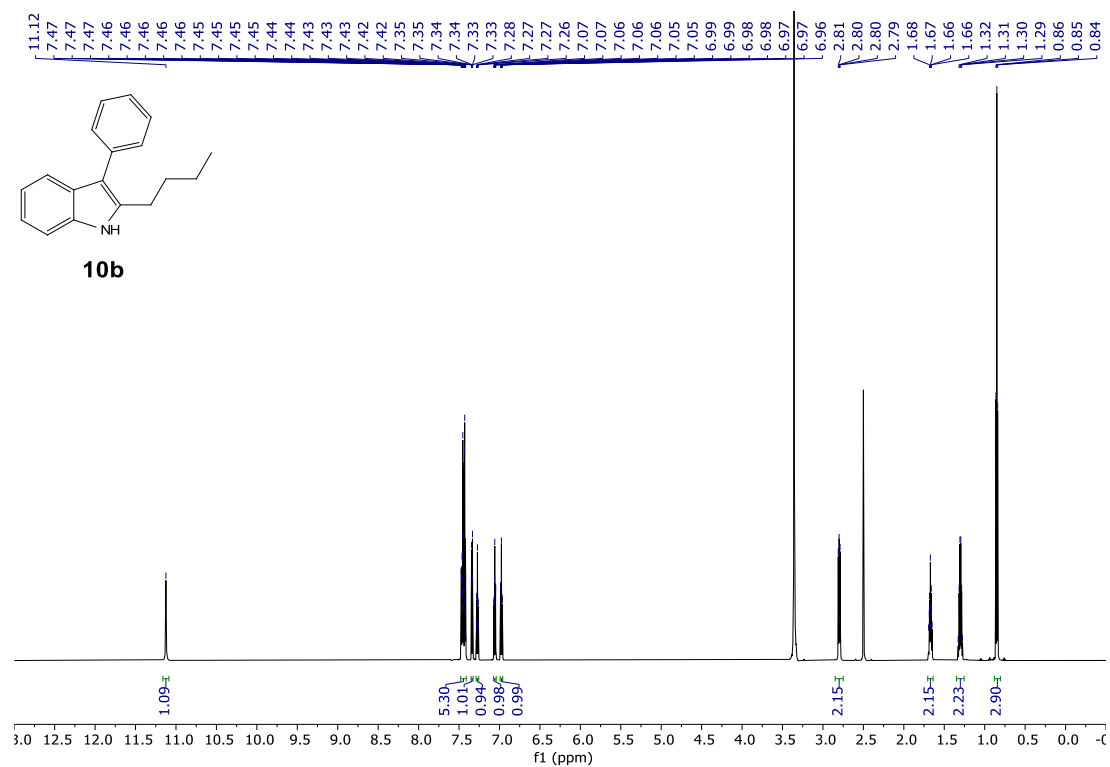

**Figure S29.**  $^1\text{H}$  NMR spectrum (700 MHz) of 2-butyl-3-phenyl-1*H*-indole (**10b**) in  $\text{DMSO-}d_6$

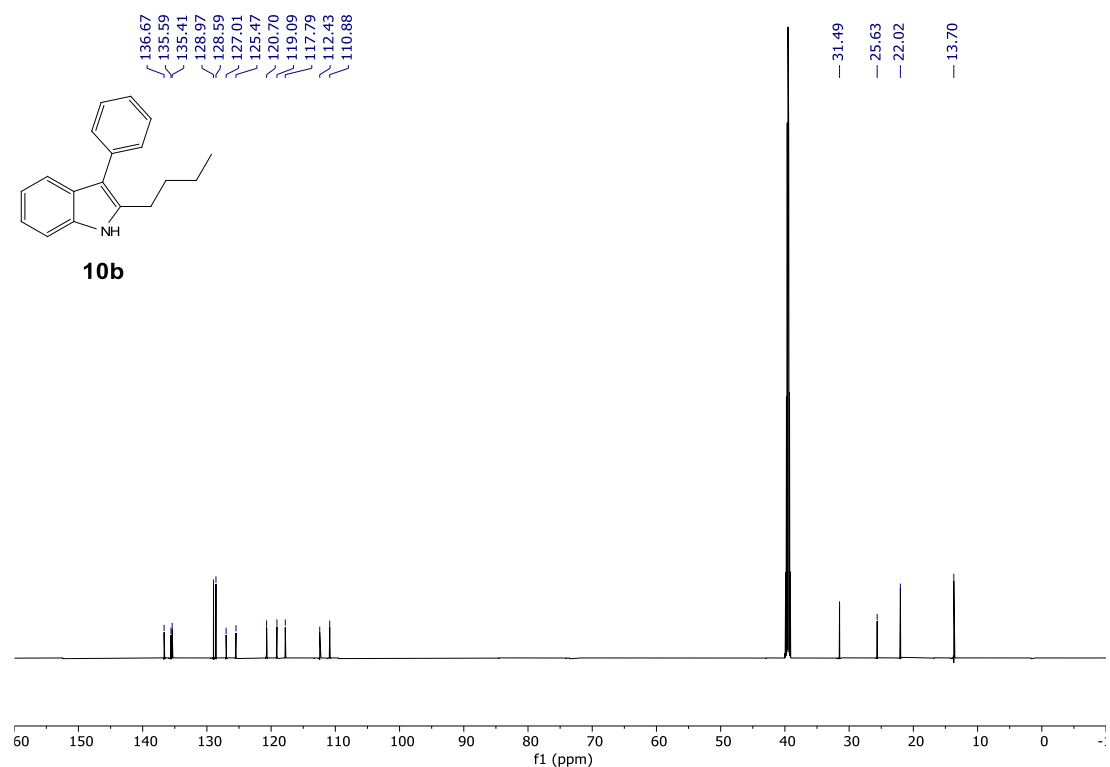

**Figure S30.**  $^{13}\text{C}\{^1\text{H}\}$  NMR spectrum (175 MHz) of 2-butyl-3-phenyl-1*H*-indole (**10b**) in  $\text{DMSO-}d_6$

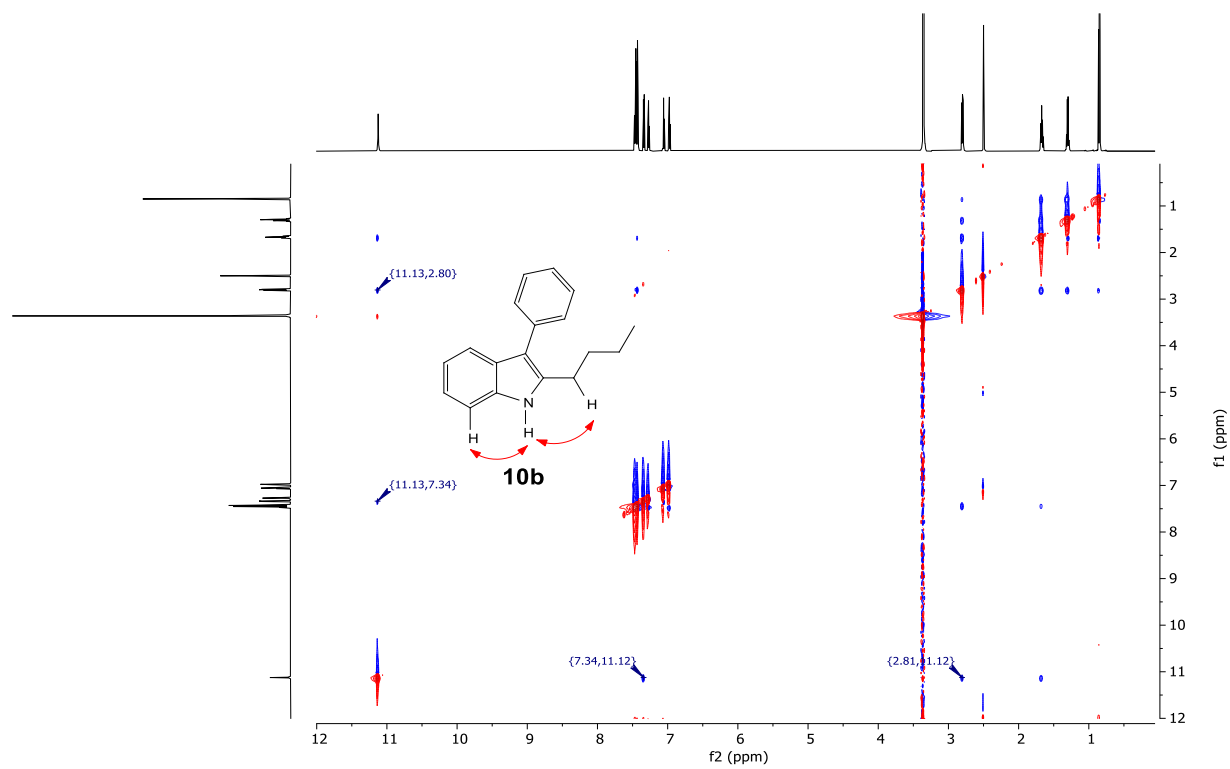

**Figure S31.** NOESY spectrum of 2-butyl-3-phenyl-1H-indole (**10b**) in DMSO- $d_6$

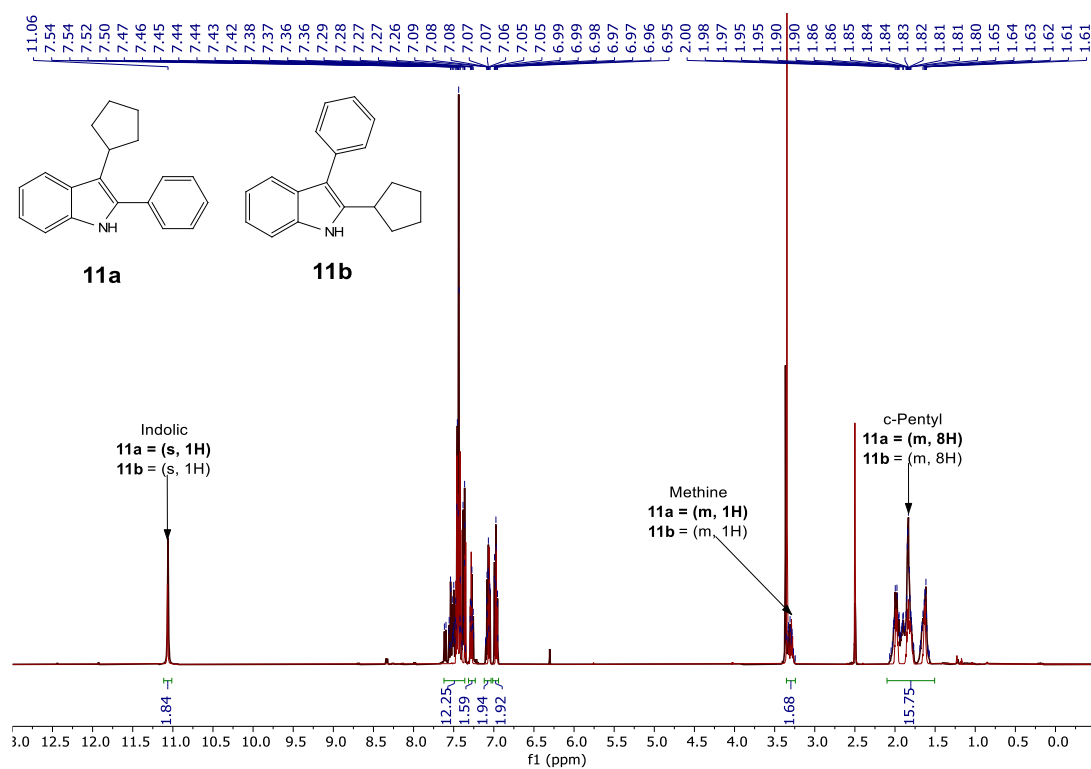

**Figure S32.**  $^1\text{H}$  NMR spectrum (700 MHz) of the mixture between compound 3-cyclopentyl-2-phenyl-1*H*-indole (**11a**) and 2-cyclopentyl-3-phenyl-1*H*-indole (**11b**) in  $\text{DMSO-}d_6$

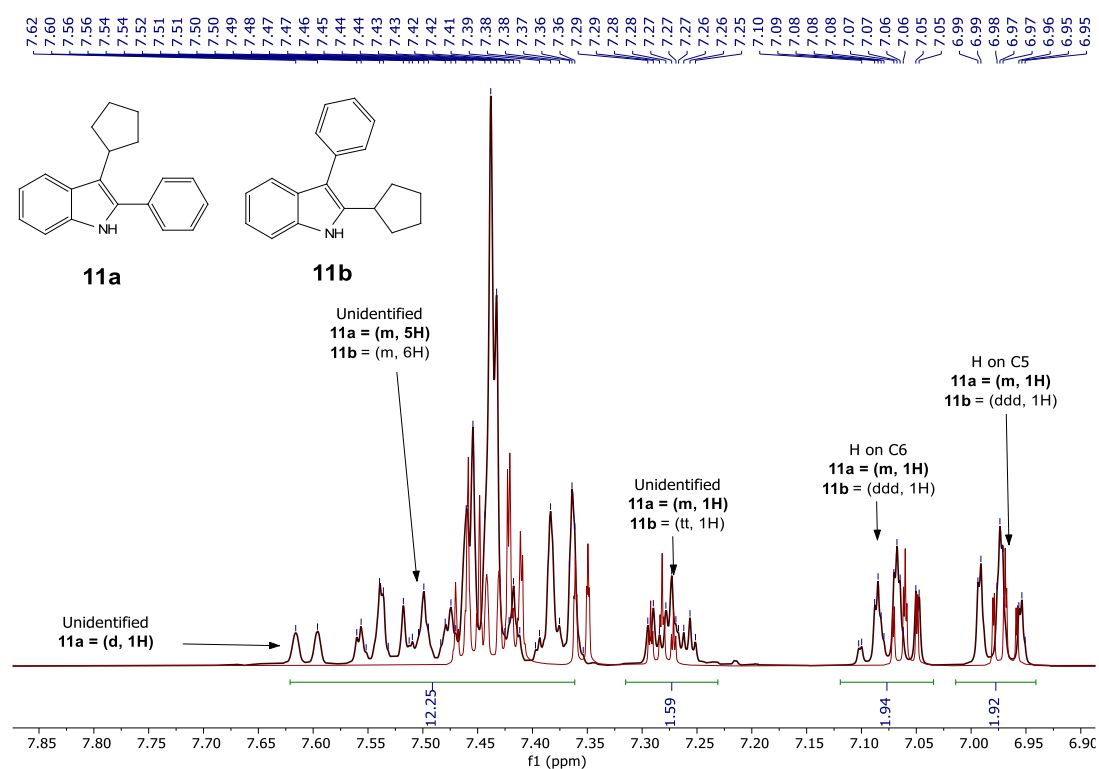

**Figure S33.** Expanded  $^1\text{H}$  NMR spectrum (700 MHz) of the mixture between compound 3-cyclopentyl-2-phenyl-1*H*-indole (**11a**) and 2-cyclopentyl-3-phenyl-1*H*-indole (**11b**) in  $\text{DMSO-}d_6$  (expanding aromatic region)



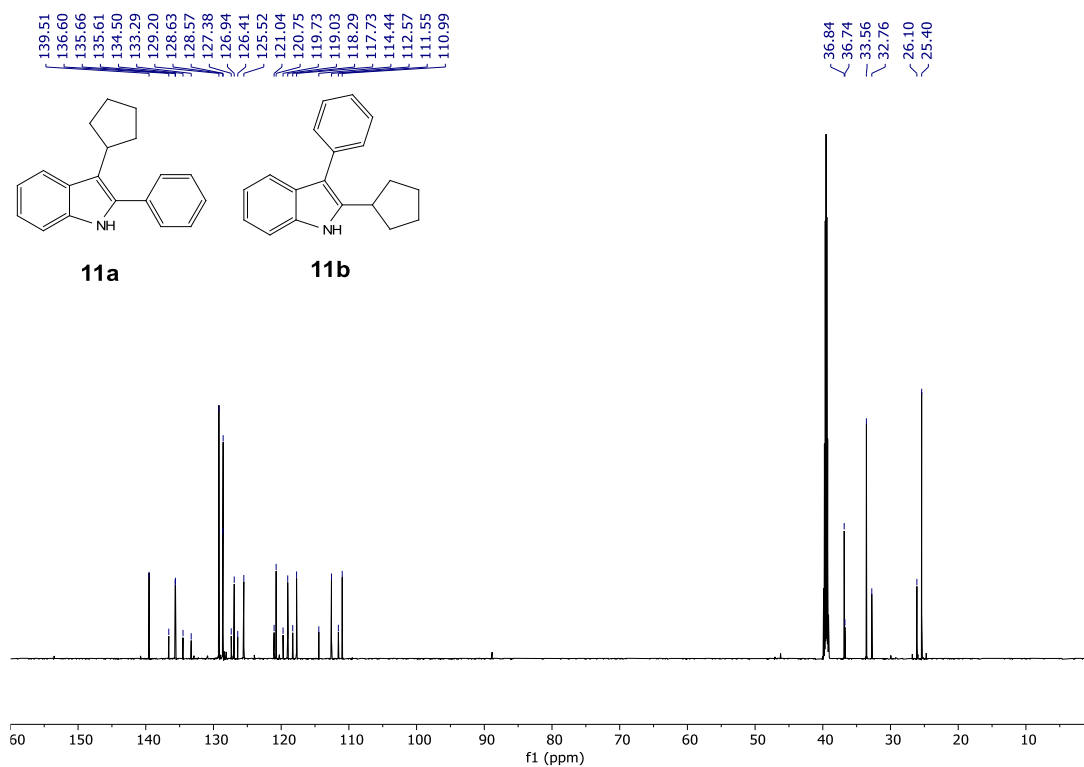

**Figure S34.**  $^{13}\text{C}\{^1\text{H}\}$  NMR spectrum (175 MHz) of the mixture between compound 3-cyclopentyl-2-phenyl-1H-indole (**11a**) and 2-cyclopentyl-3-phenyl-1H-indole (**11b**) in  $\text{DMSO-}d_6$

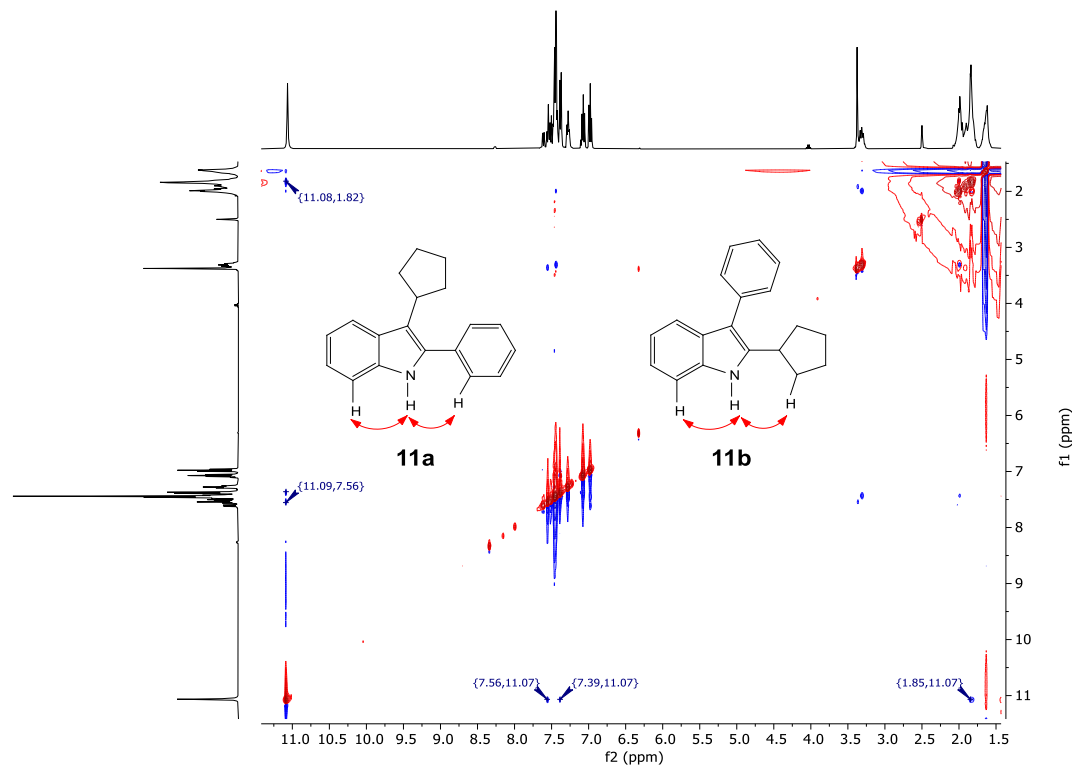

**Figure S35.** NOESY spectrum of the mixture between compound 3-cyclopentyl-2-phenyl-1H-indole (**11a**) and 2-cyclopentyl-3-phenyl-1H-indole (**11b**) in  $\text{DMSO-}d_6$

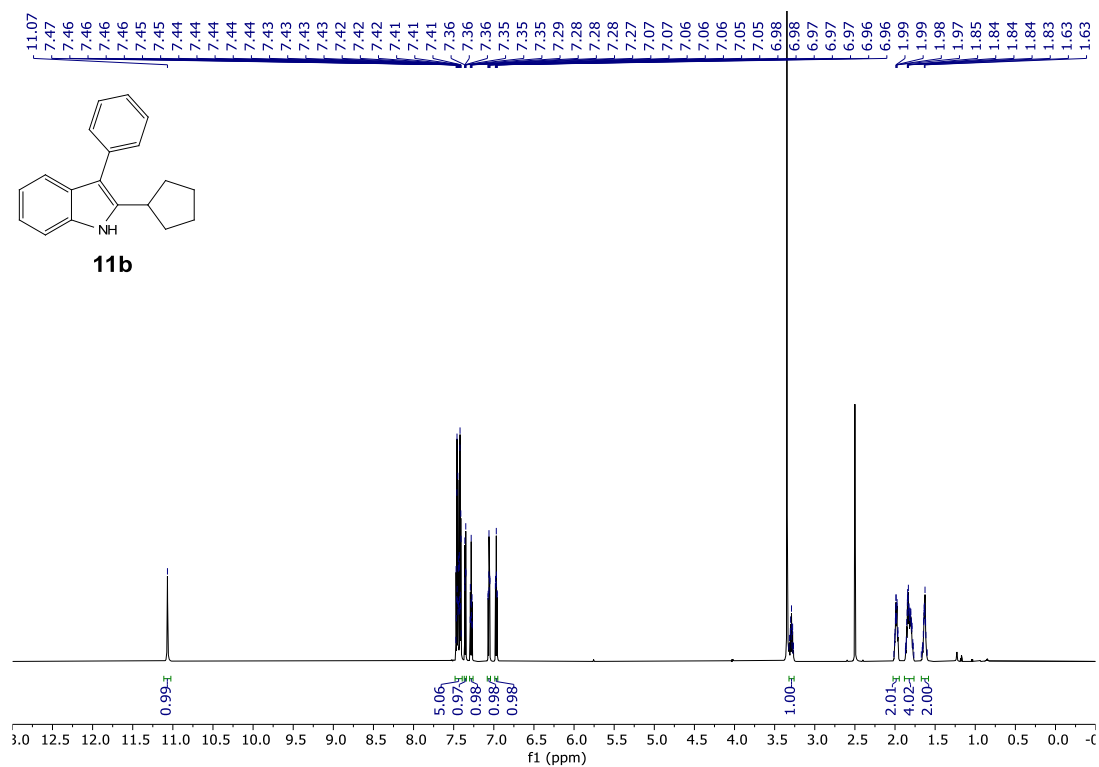

**Figure S36.** <sup>1</sup>H NMR spectrum (700 MHz) of 2-cyclopentyl-3-phenyl-1H-indole (**11b**) in DMSO-*d*<sub>6</sub>

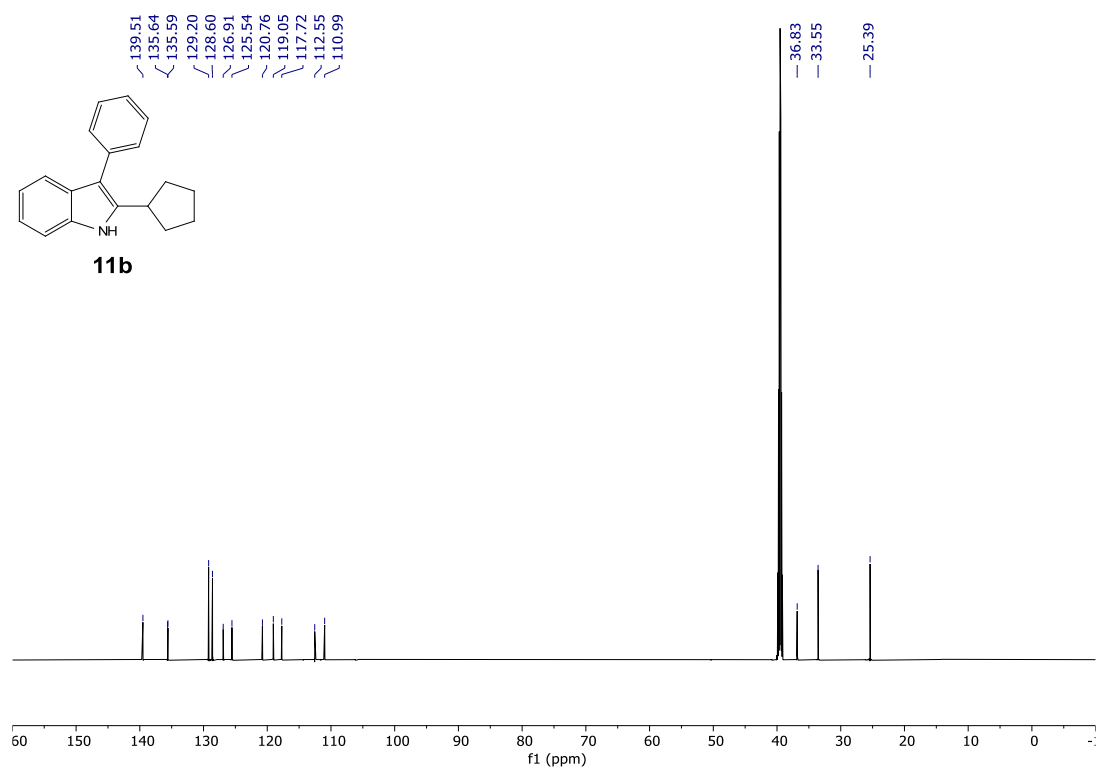

**Figure S37.** <sup>13</sup>C{<sup>1</sup>H} NMR spectrum (175 MHz) of 2-cyclopentyl-3-phenyl-1H-indole (**11b**) in DMSO-*d*<sub>6</sub>

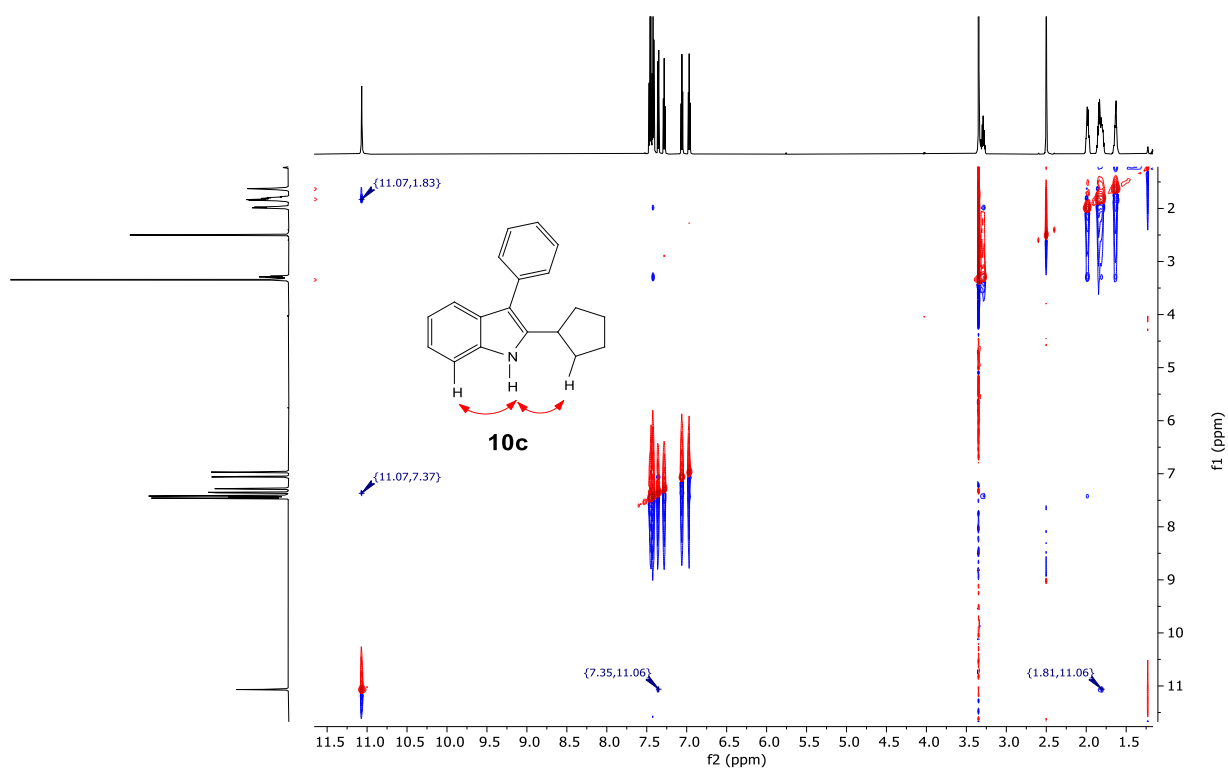

**Figure S38.** NOESY spectrum of 2-cyclopentyl-3-phenyl-1H-indole (**11b**) in DMSO- $d_6$

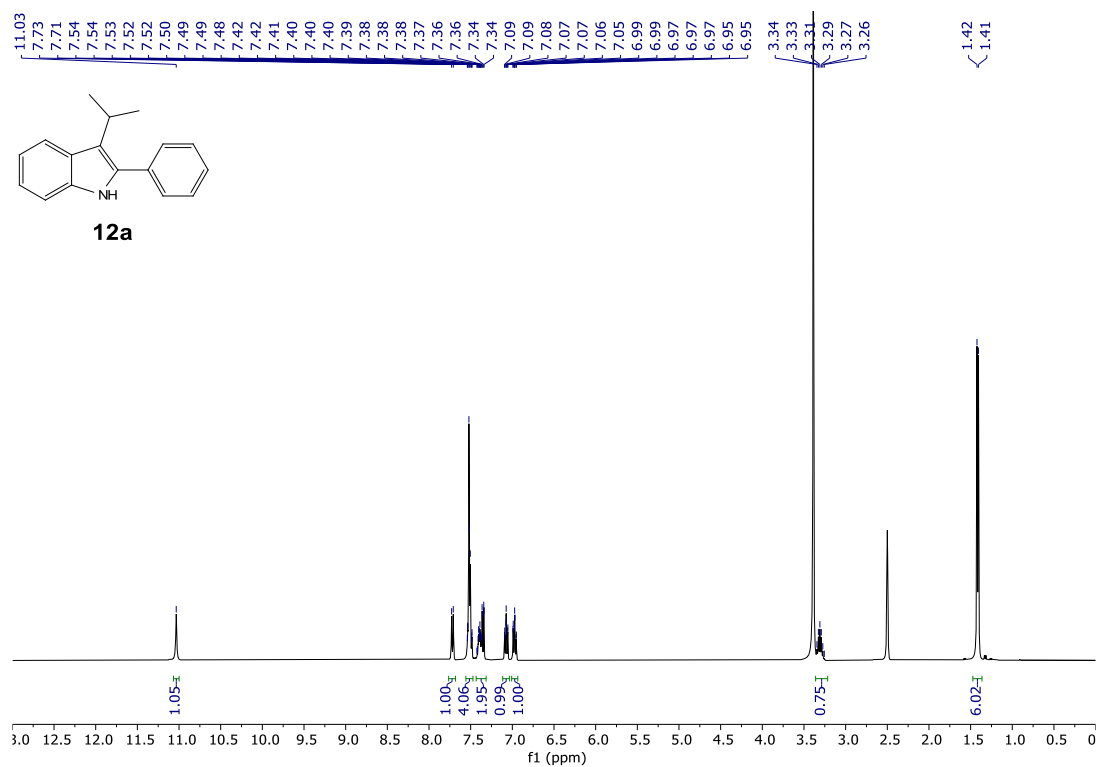

**Figure S39.**  $^1\text{H}$  NMR spectrum (400 MHz) of 3-isopropyl-2-phenyl-1H-indole (**12a**) in DMSO- $d_6$

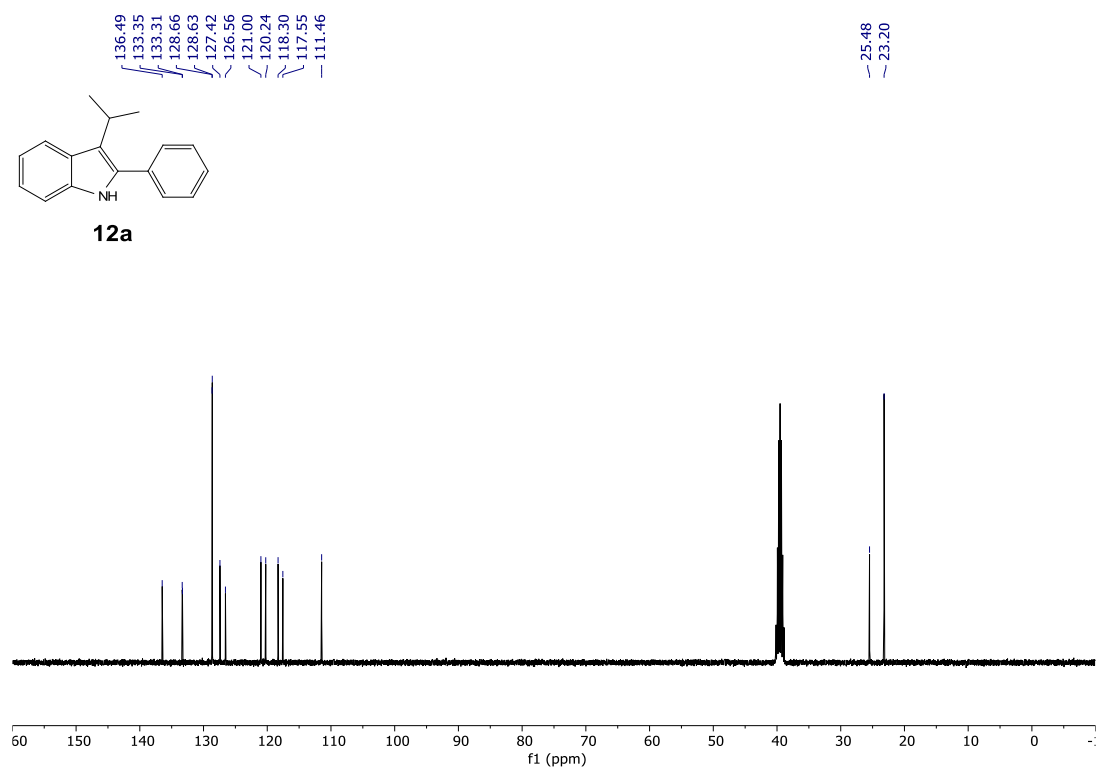

**Figure S40.**  $^{13}\text{C}\{^1\text{H}\}$  NMR spectrum (100 MHz) of 3-isopropyl-2-phenyl-1H-indole (**12a**) in DMSO- $d_6$

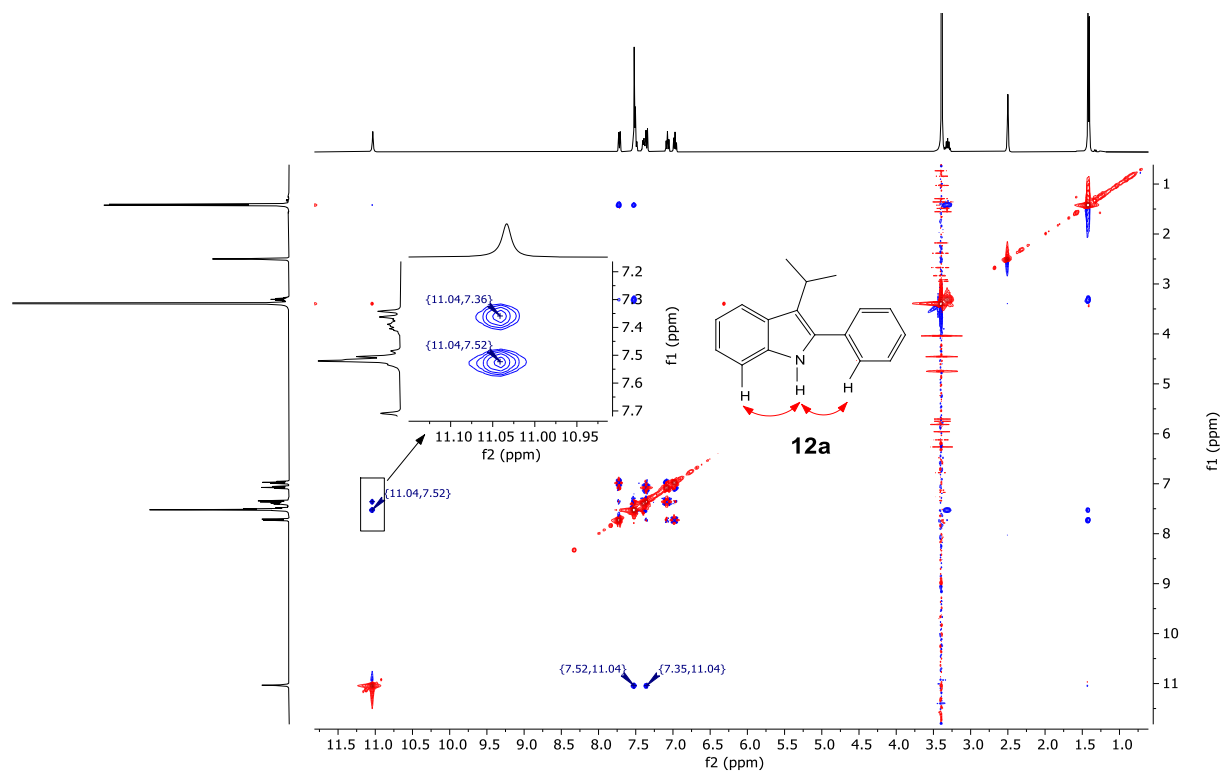

**Figure S41.** NOESY spectrum of 3-isopropyl-2-phenyl-1H-indole (**12a**) in DMSO- $d_6$

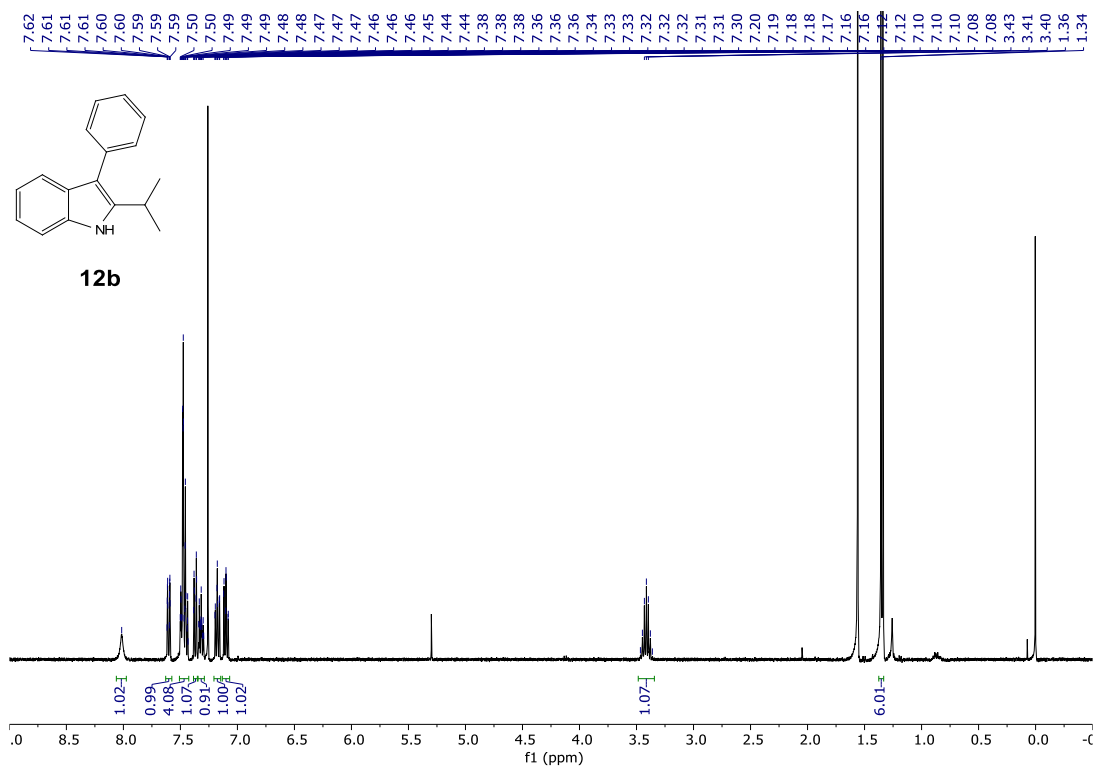

**Figure S42.** <sup>1</sup>H NMR spectrum (400 MHz) of 2-isopropyl-3-phenyl-1H-indole (**12b**) in CDCl<sub>3</sub>

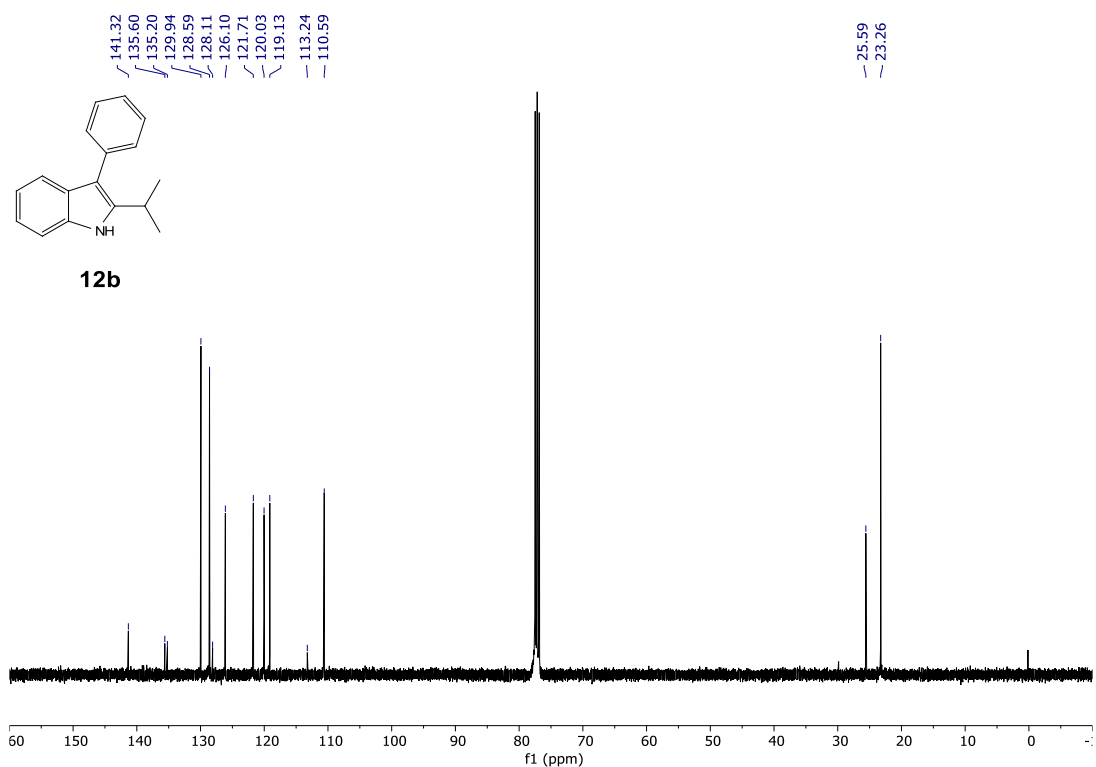

**Figure S43.** <sup>13</sup>C{<sup>1</sup>H} NMR spectrum (100 MHz) of 2-isopropyl-3-phenyl-1H-indole (**12b**) in CDCl<sub>3</sub>

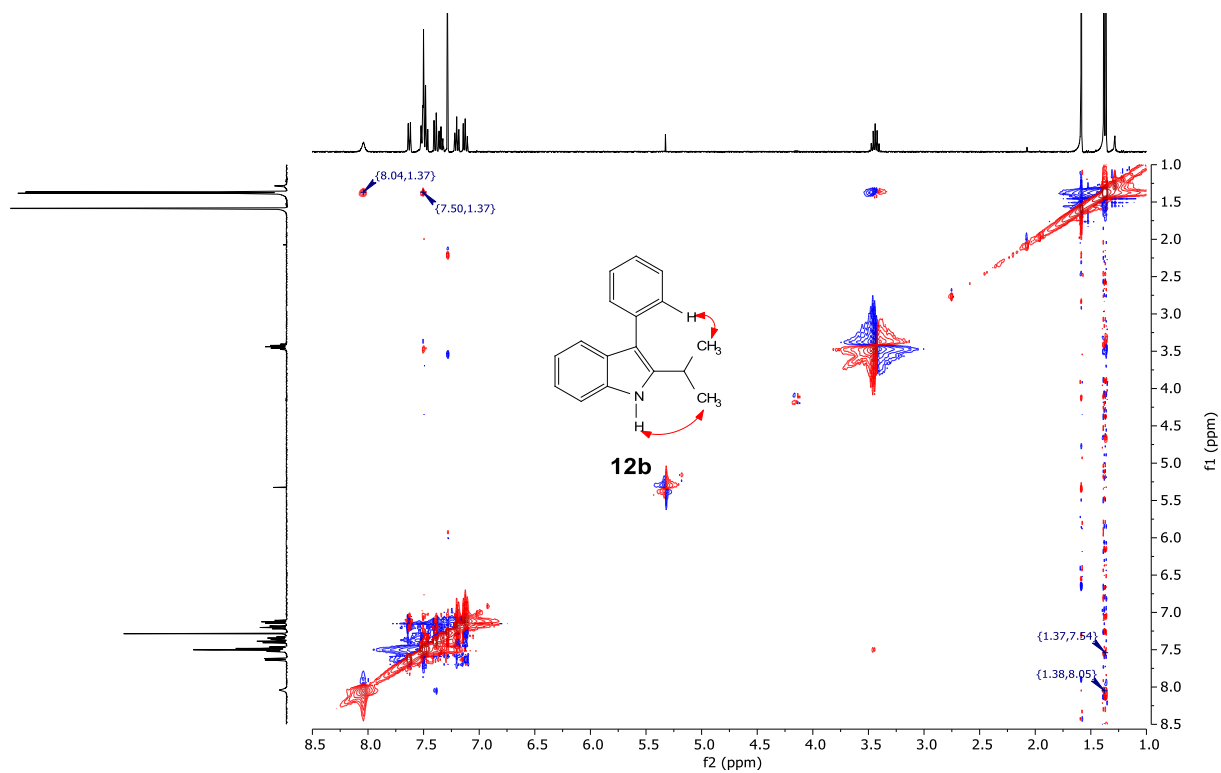

**Figure S44.** NOESY spectrum of 2-isopropyl-3-phenyl-1H-indole (**12b**) in CDCl<sub>3</sub>

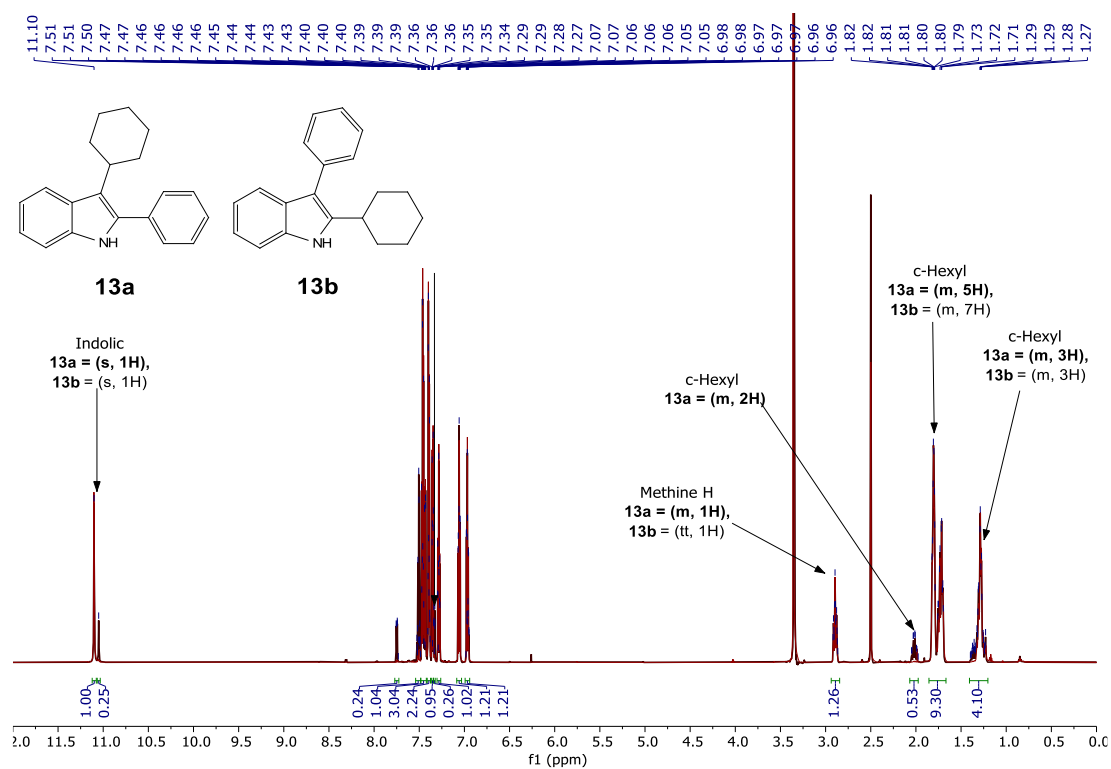

**Figure S45.**  $^1\text{H}$  NMR spectrum (700 MHz) of the mixture between 3-cyclohexyl-2-phenyl-1*H*-indole (**13a**) and 2-cyclohexyl-3-phenyl-1*H*-indole (**13b**) in  $\text{DMSO-}d_6$

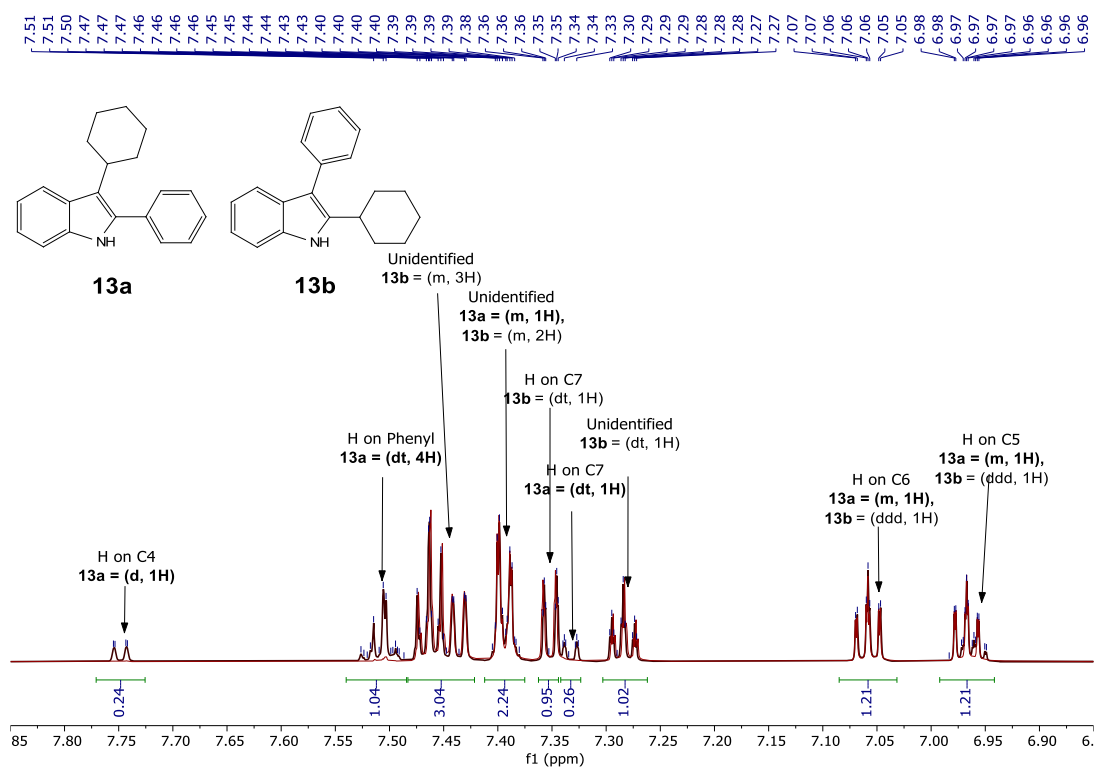

**Figure S46.** Expanded  $^1\text{H}$  NMR spectrum (700 MHz) of the mixture between 3-cyclohexyl-2-phenyl-1*H*-indole (**13a**) and 2-cyclohexyl-3-phenyl-1*H*-indole (**13b**) in  $\text{DMSO-}d_6$  (expanding aromatic region)



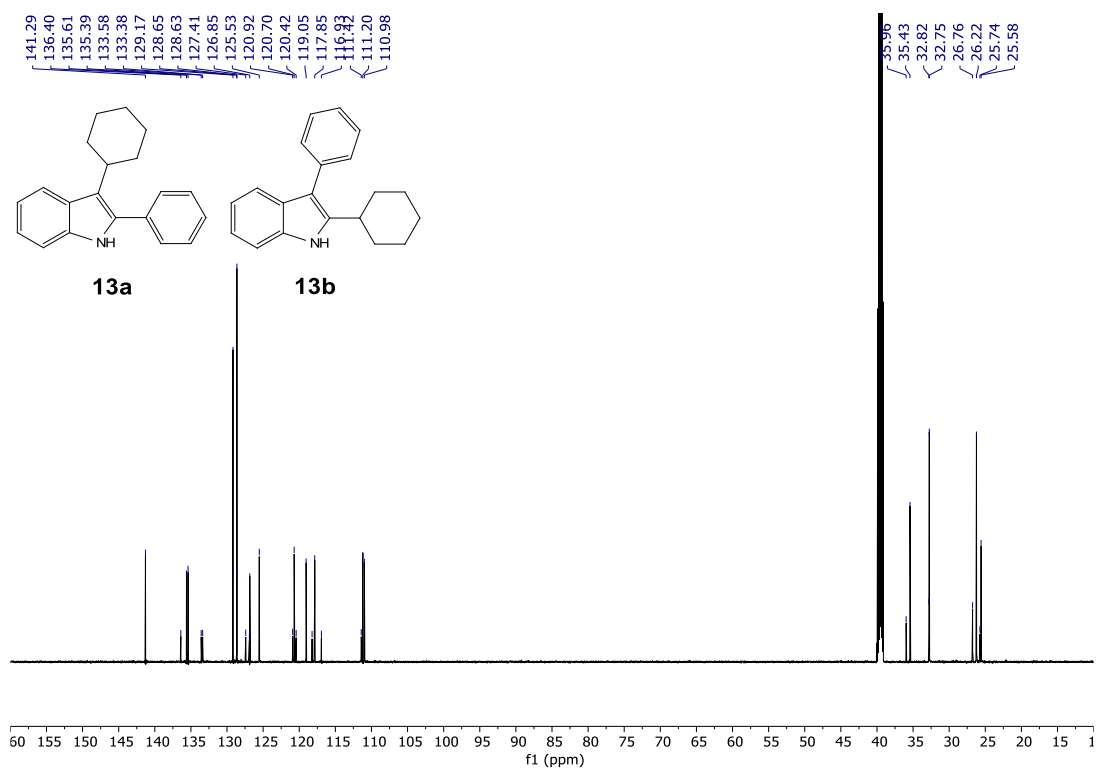

**Figure S47.**  $^{13}\text{C}\{^1\text{H}\}$  NMR spectrum (175 MHz) of the mixture between 3-cyclohexyl-2-phenyl-1*H*-indole (**13a**) and 2-cyclohexyl-3-phenyl-1*H*-indole (**13b**) in  $\text{DMSO-}d_6$

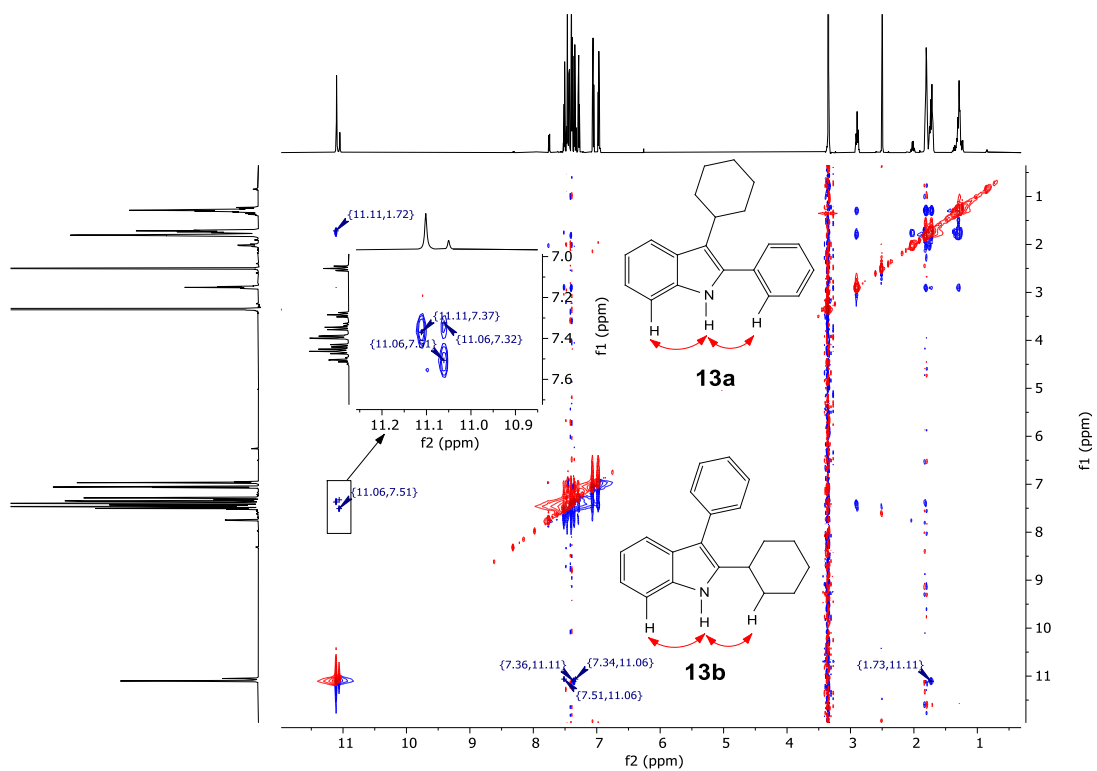

**Figure S48.** NOESY spectrum of the mixture between 3-cyclohexyl-2-phenyl-1*H*-indole (**13a**) and 2-cyclohexyl-3-phenyl-1*H*-indole (**13b**) in  $\text{DMSO-}d_6$

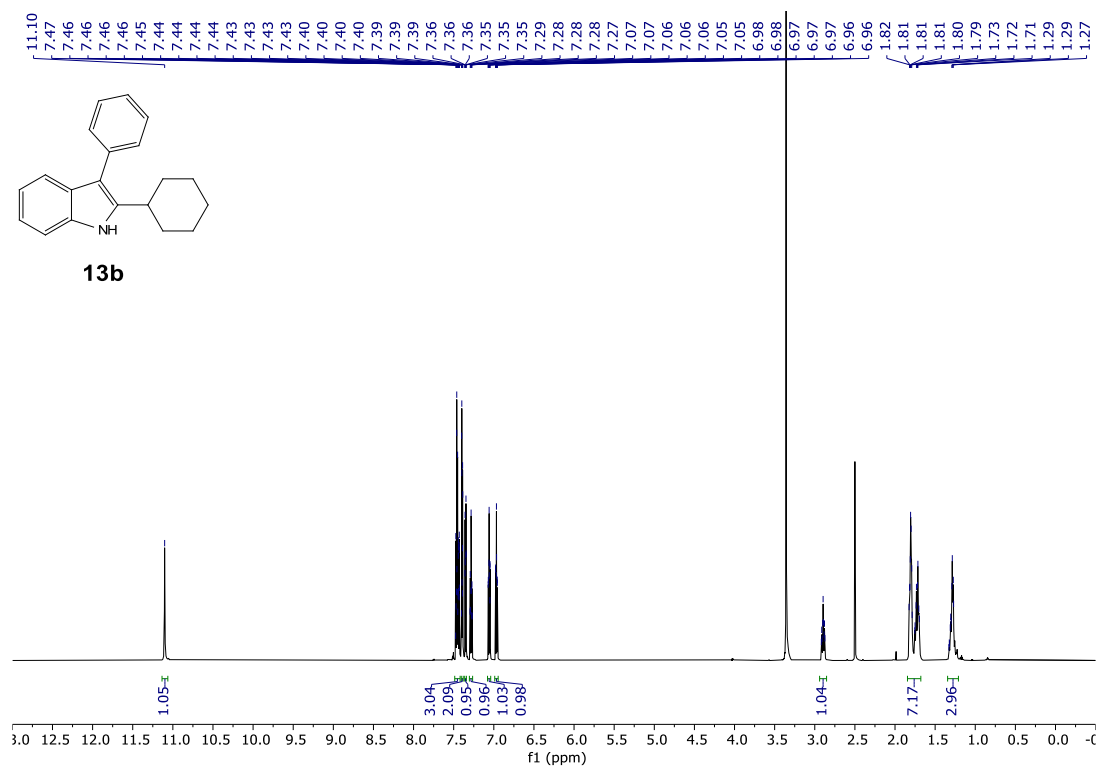

**Figure S49.**  $^1\text{H}$  NMR spectrum (700 MHz) of 2-cyclohexyl-3-phenyl-1H-indole (13b) in DMSO- $d_6$

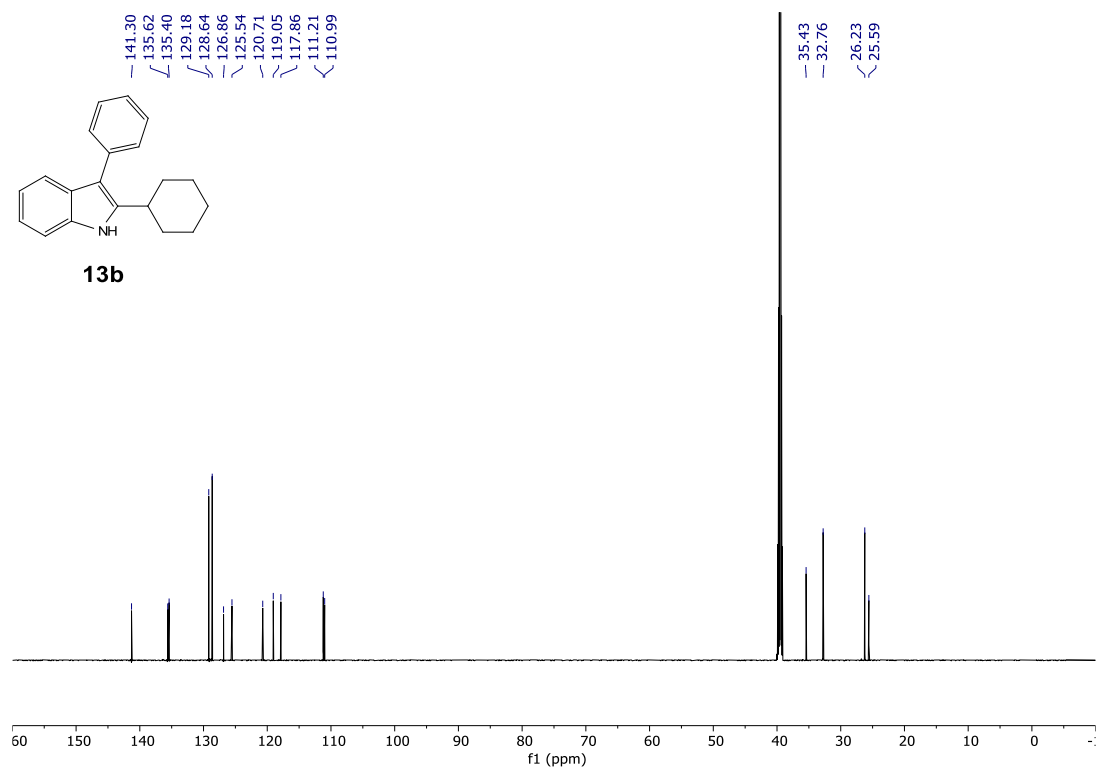

**Figure S50.**  $^{13}\text{C}\{^1\text{H}\}$  NMR spectrum (175 MHz) of 2-cyclohexyl-3-phenyl-1H-indole (13b) in DMSO- $d_6$

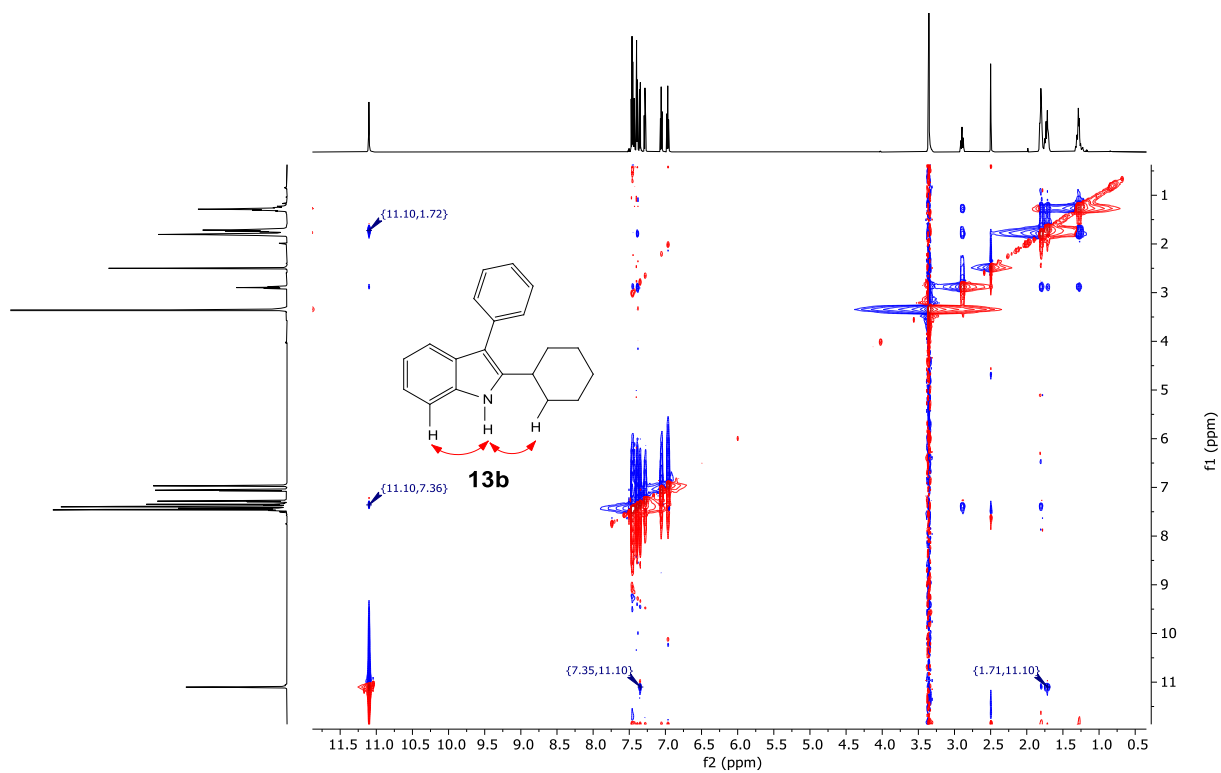

**Figure S51.** NOESY spectrum of cyclohexyl-3-phenyl-1*H*-indole (**13b**) in DMSO-*d*<sub>6</sub>

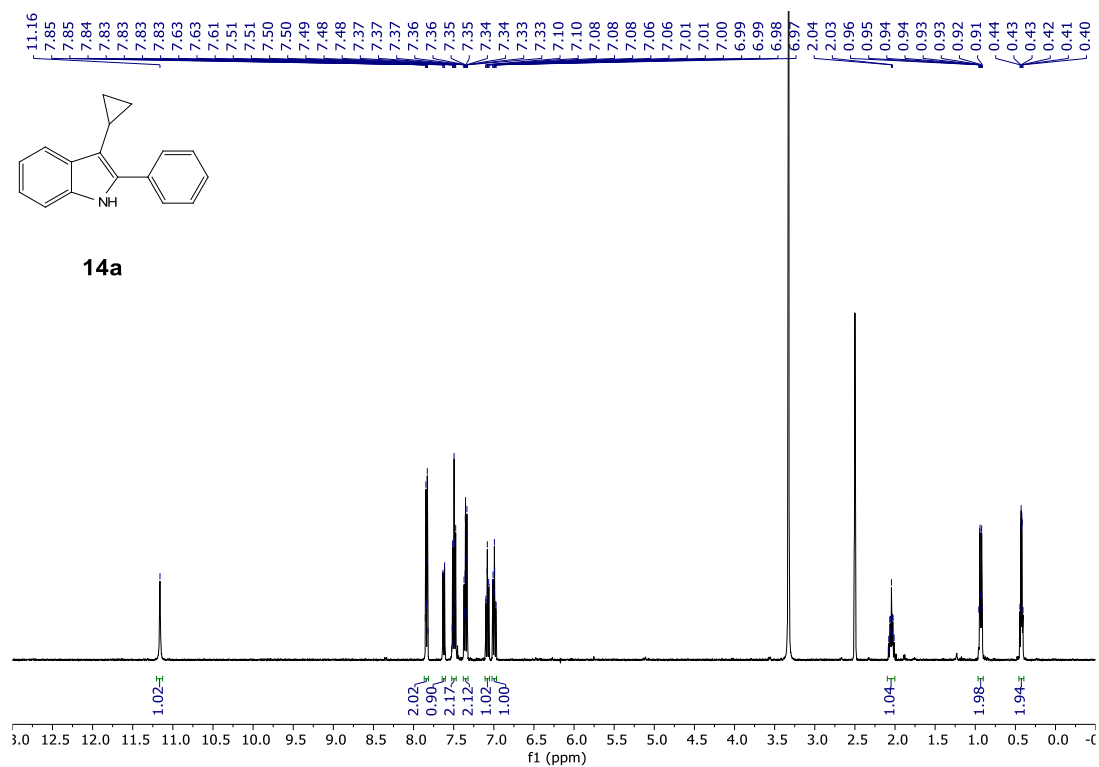

**Figure S52.**  $^1\text{H}$  NMR spectrum (400 MHz) of 3-cyclopropyl-2-phenyl-1H-indole (**14a**) in  $\text{DMSO-}d_6$

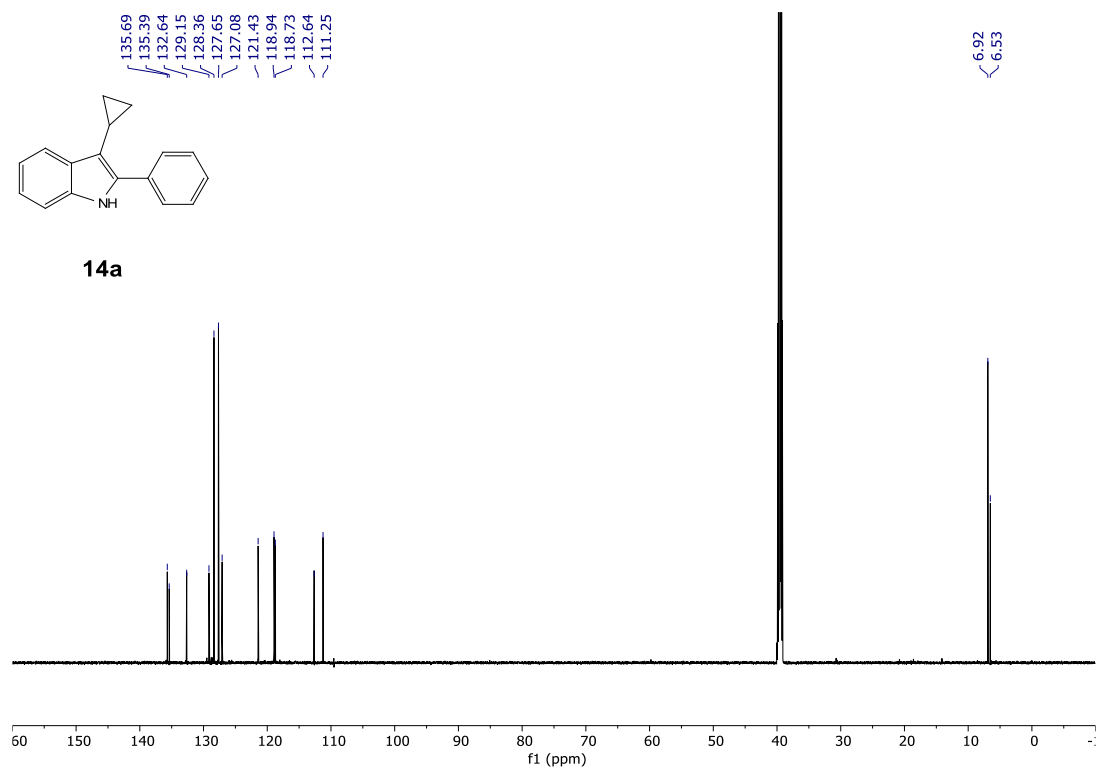

**Figure S53.**  $^{13}\text{C}\{^1\text{H}\}$  NMR spectrum (100 MHz) of 3-cyclopropyl-2-phenyl-1H-indole (**14a**) in  $\text{DMSO-}d_6$

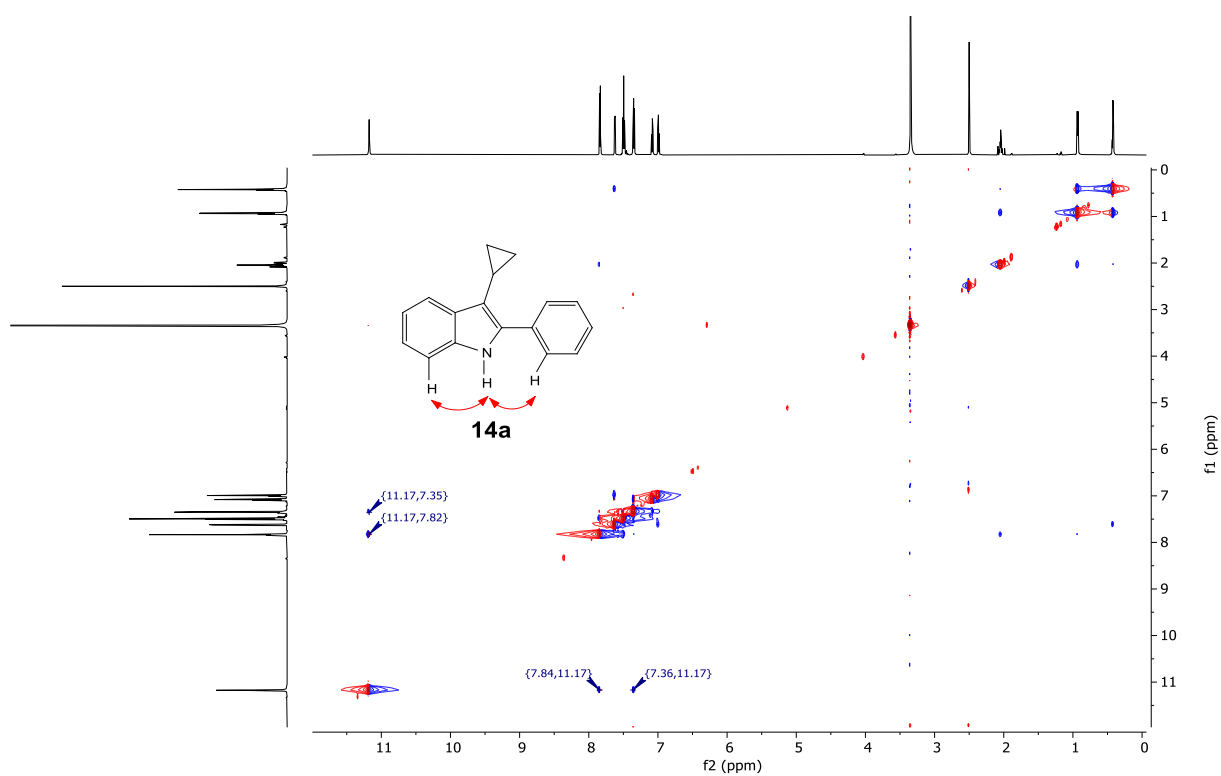

**Figure S54.** NOESY spectrum of 3-cyclopropyl-2-phenyl-1H-indole (**14a**) in DMSO-*d*<sub>6</sub>

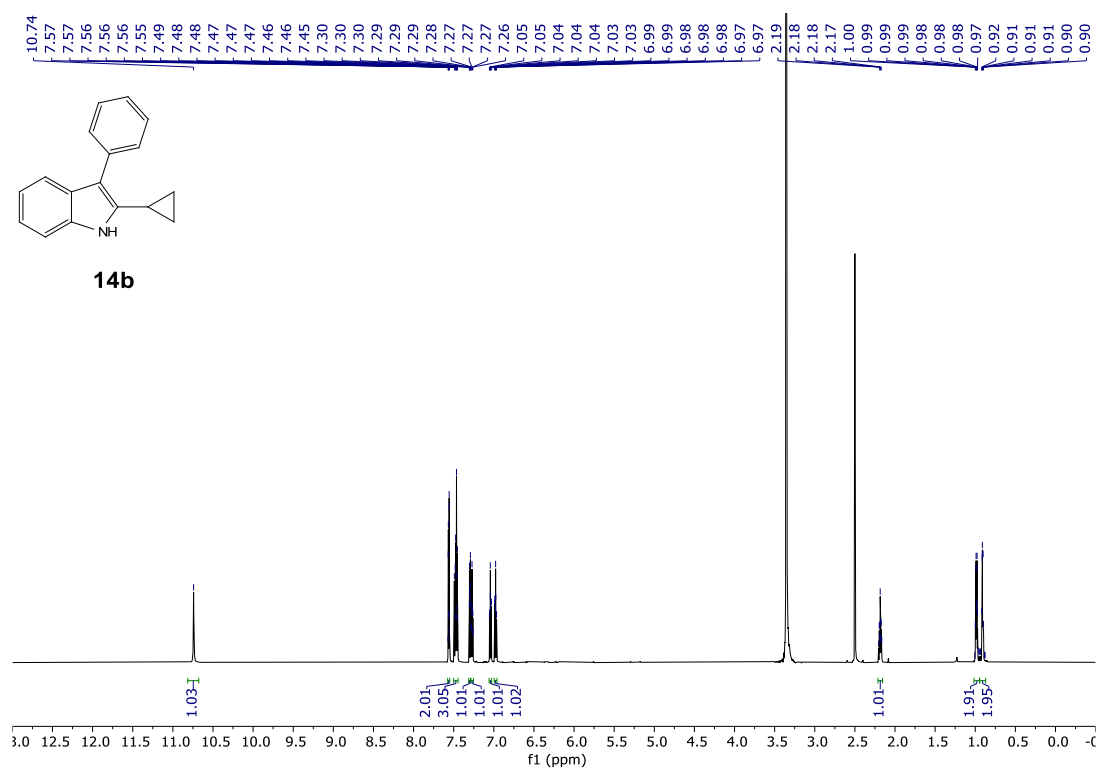

**Figure S55.** <sup>1</sup>H NMR spectrum (700 MHz) of 2-cyclopropyl-3-phenyl-1*H*-indole (**14b**) in DMSO-*d*<sub>6</sub>

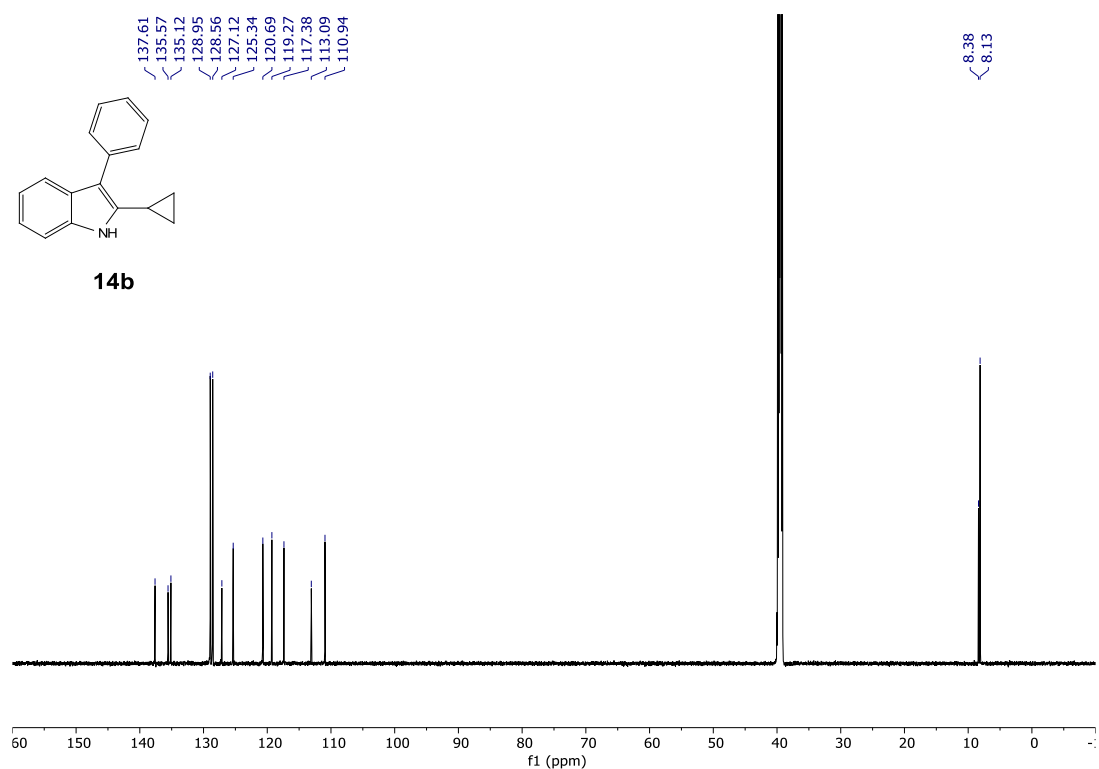

**Figure S56.** <sup>13</sup>C{<sup>1</sup>H} NMR spectrum (175 MHz) of 2-cyclopropyl-3-phenyl-1*H*-indole (**14b**) in DMSO-*d*<sub>6</sub>

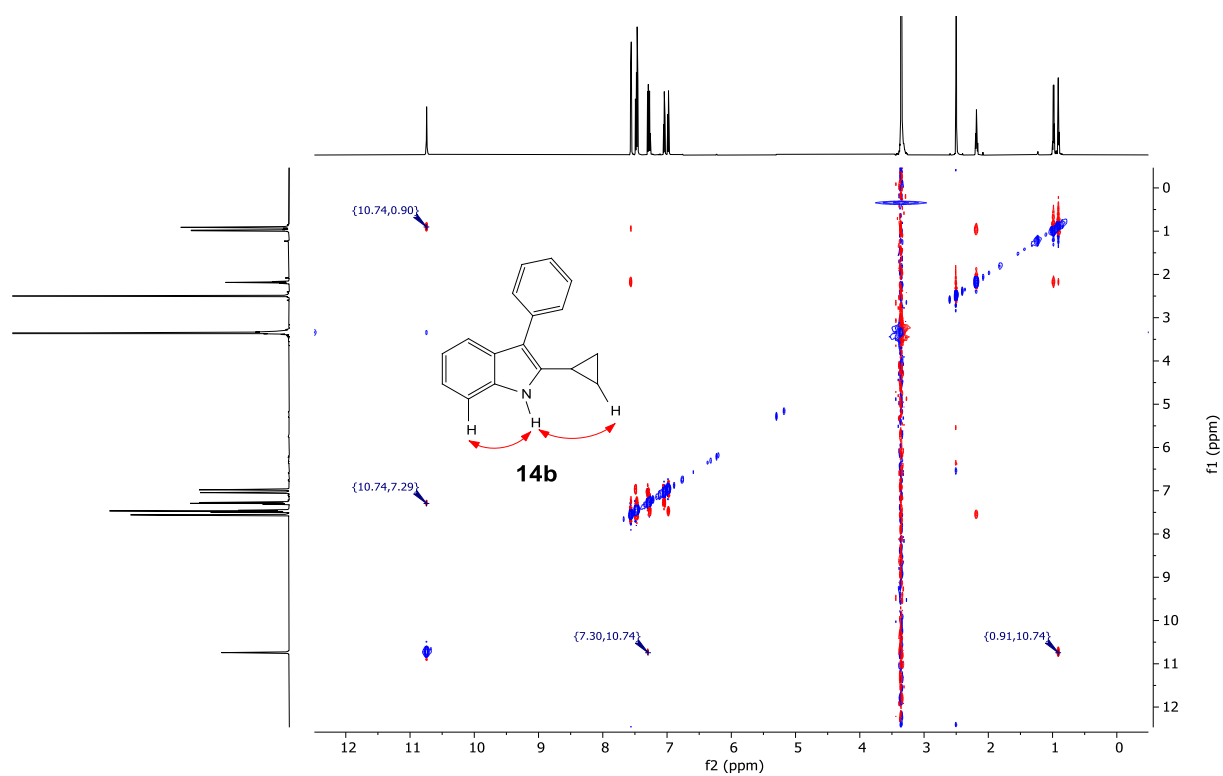

**Figure S57.** NOESY spectrum of 2-cyclopropyl-3-phenyl-1*H*-indole (**14b**) in DMSO-*d*<sub>6</sub>

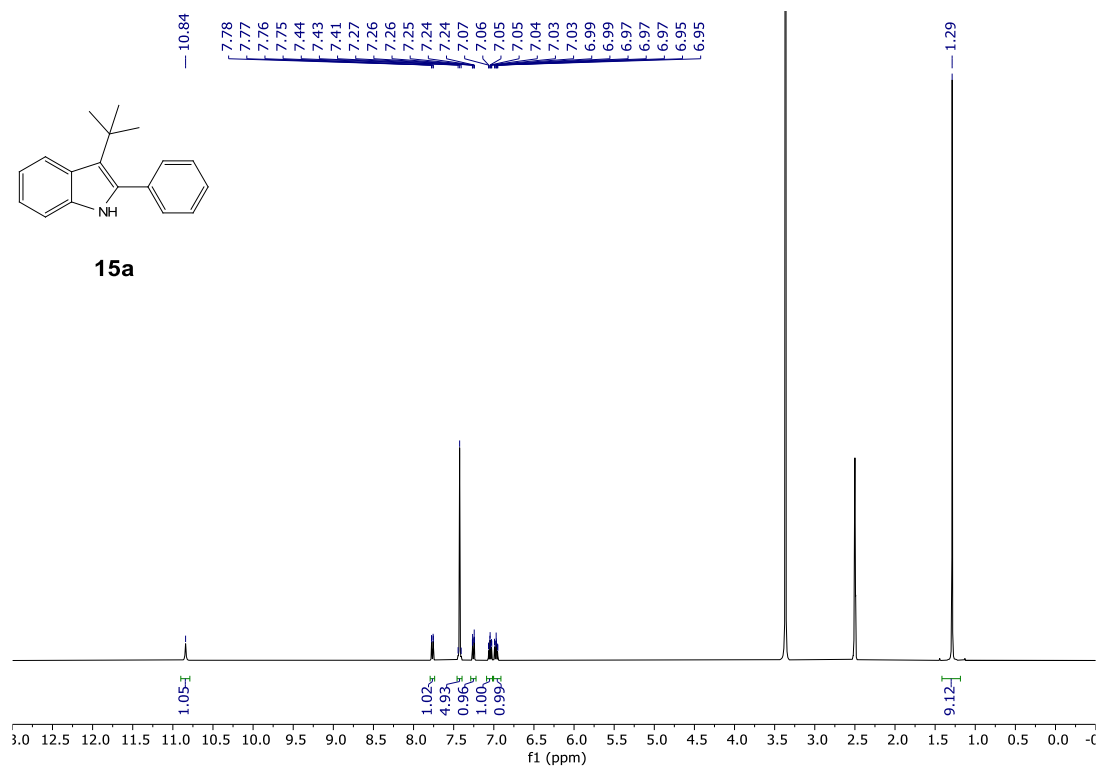

**Figure S58.**  $^1\text{H}$  NMR spectrum (400 MHz) of 3-(*tert*-butyl)-2-phenyl-1*H*-indole (**15a**) in  $\text{DMSO-}d_6$

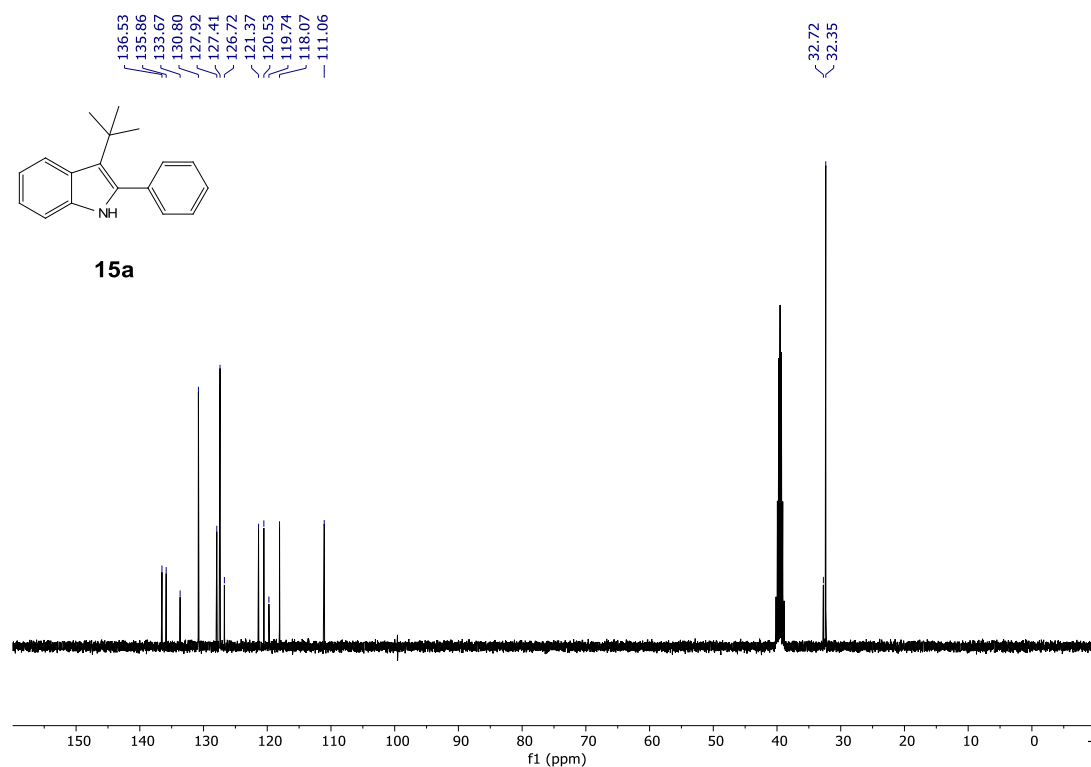

**Figure S59.**  $^{13}\text{C}\{^1\text{H}\}$  NMR spectrum (100 MHz) of 3-(*tert*-butyl)-2-phenyl-1*H*-indole (**15a**) in  $\text{DMSO-}d_6$



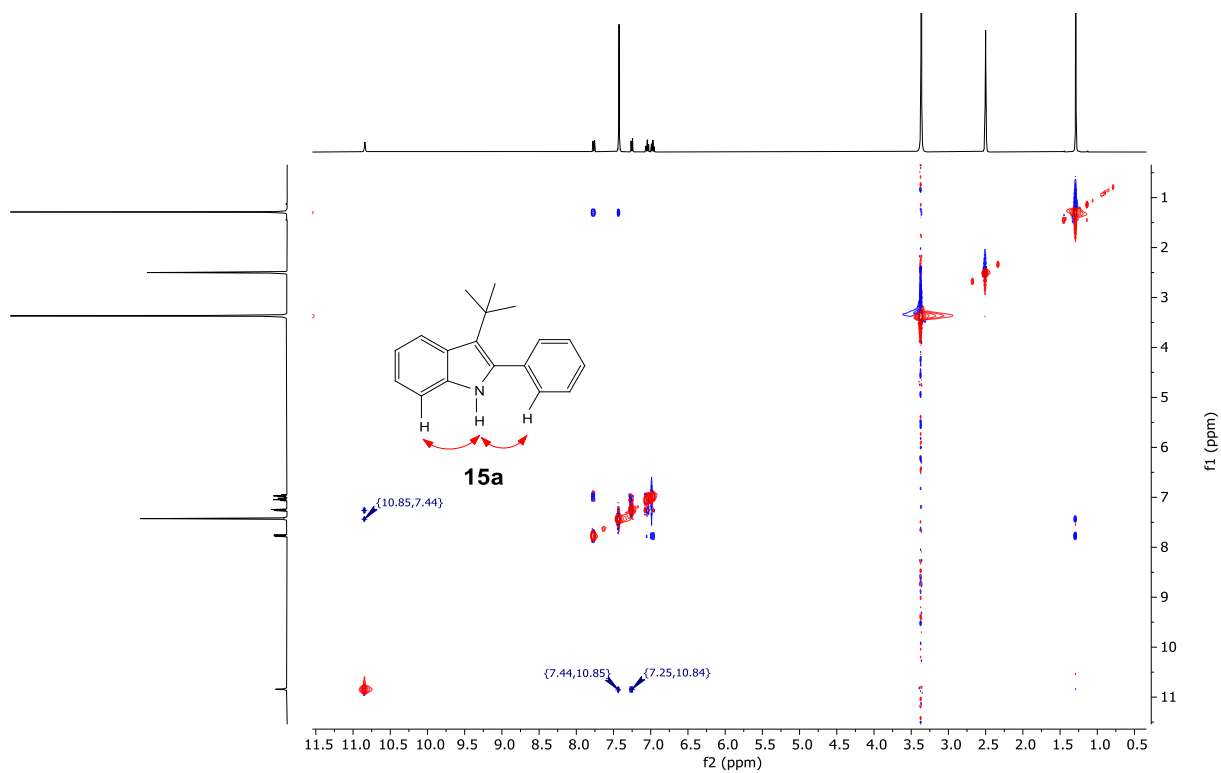

**Figure S60.** NOESY spectrum of 3-(*tert*-butyl)-2-phenyl-1*H*-indole (**15a**) in DMSO-*d*<sub>6</sub>

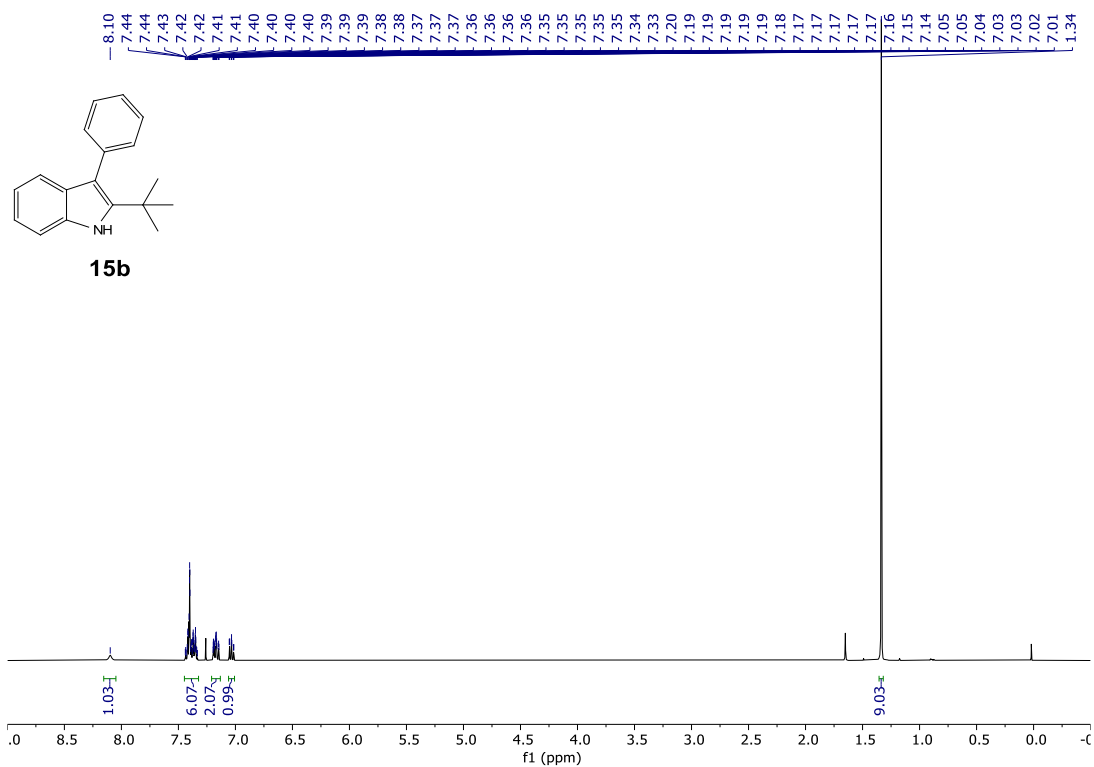

**Figure S61.** <sup>1</sup>H NMR spectrum (400 MHz) of 2-(*tert*-butyl)-3-phenyl-1*H*-indole (**15b**) in CDCl<sub>3</sub>

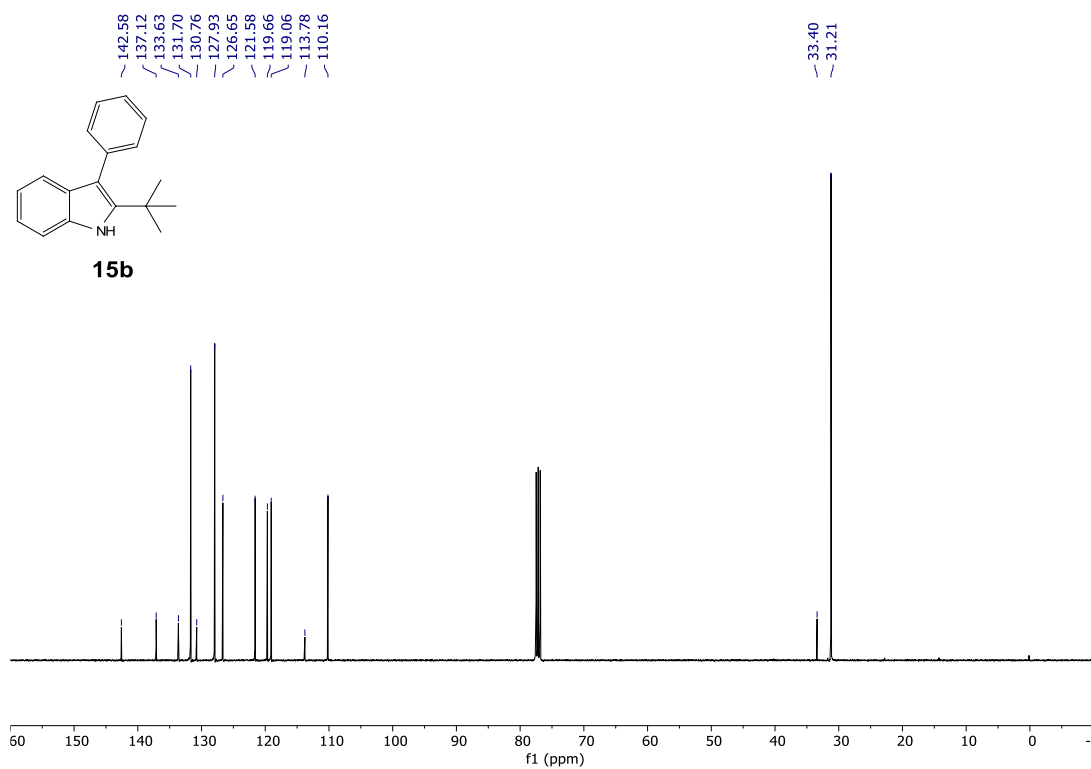

**Figure S62.** <sup>13</sup>C{<sup>1</sup>H} NMR spectrum (100 MHz) of 2-(*tert*-butyl)-3-phenyl-1*H*-indole (**15b**) in CDCl<sub>3</sub>

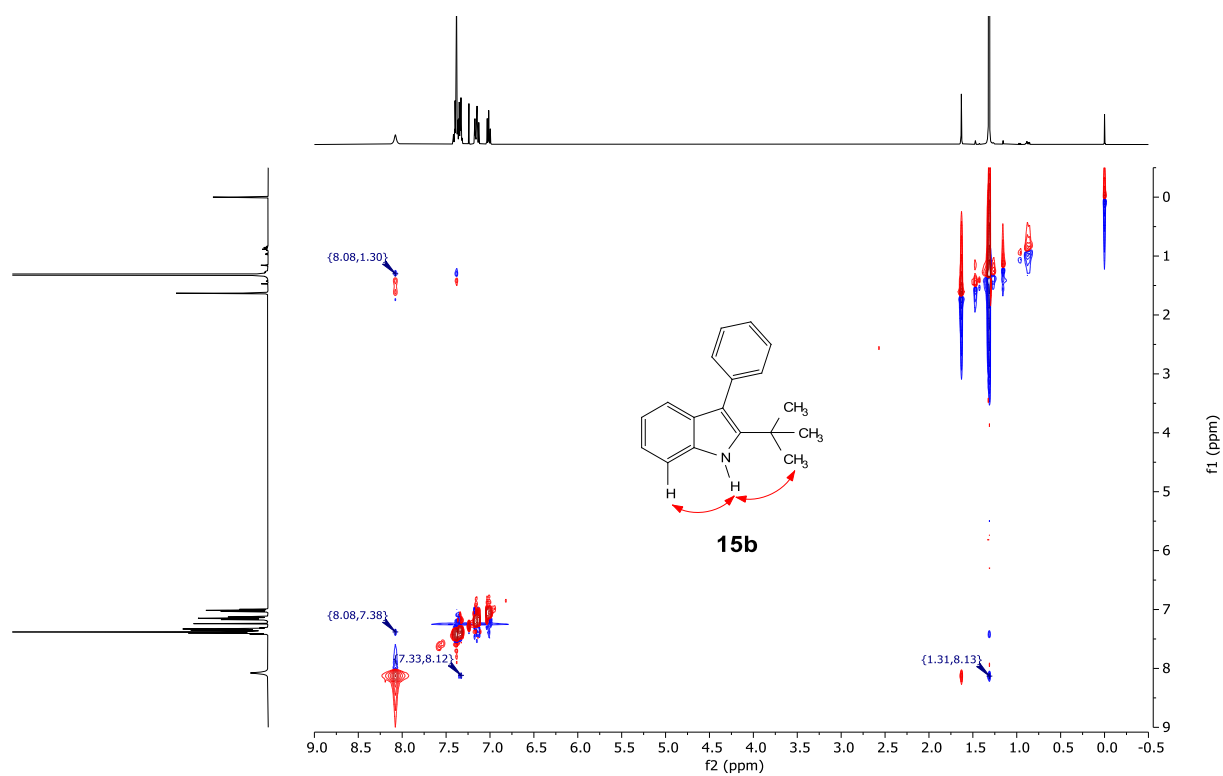

**Figure S63.** NOESY spectrum of 2-(*tert*-butyl)-3-phenyl-1*H*-indole (**15b**) in CDCl<sub>3</sub>

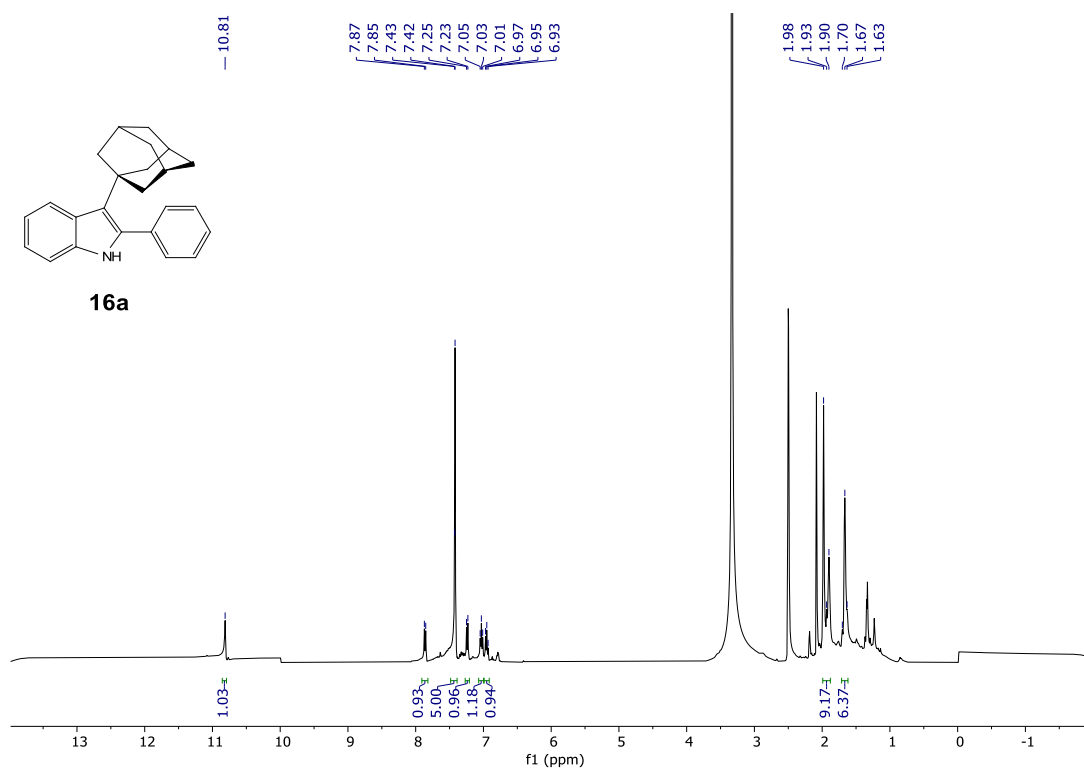

**Figure S64.**  $^1\text{H}$  NMR spectrum (400 MHz) of 3-(adamantan-1-yl)-2-phenyl-1H-indole (**16a**) in  $\text{DMSO-}d_6$

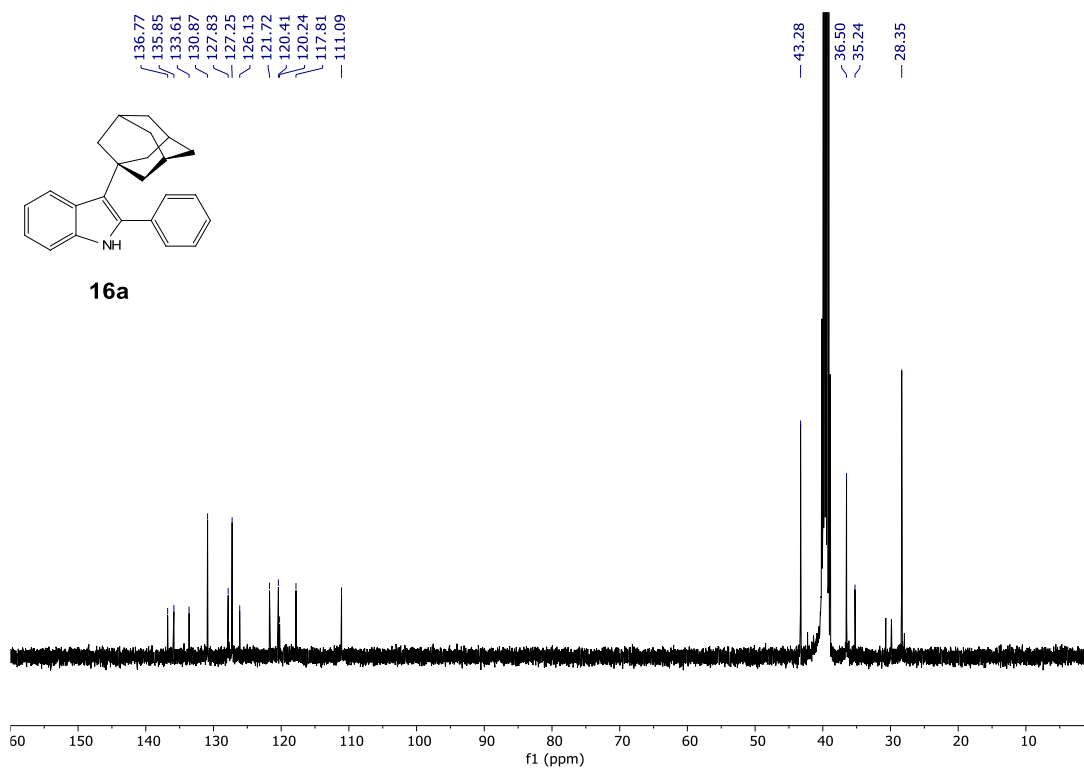

**Figure S65.**  $^{13}\text{C}\{^1\text{H}\}$  NMR spectrum (100 MHz) of 3-(adamantan-1-yl)-2-phenyl-1H-indole (**16a**) in  $\text{DMSO-}d_6$

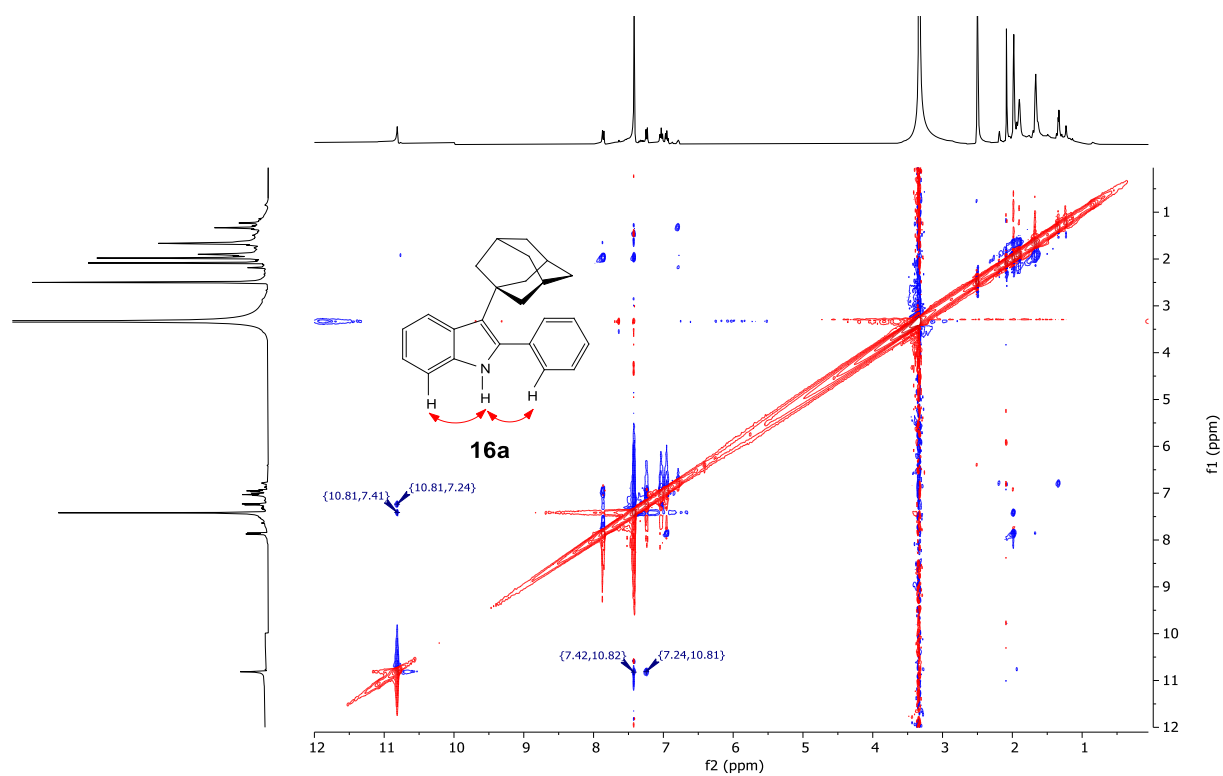

**Figure S66.** NOESY spectrum of 3-(adamantan-1-yl)-2-phenyl-1*H*-indole (**16a**) in DMSO- $d_6$

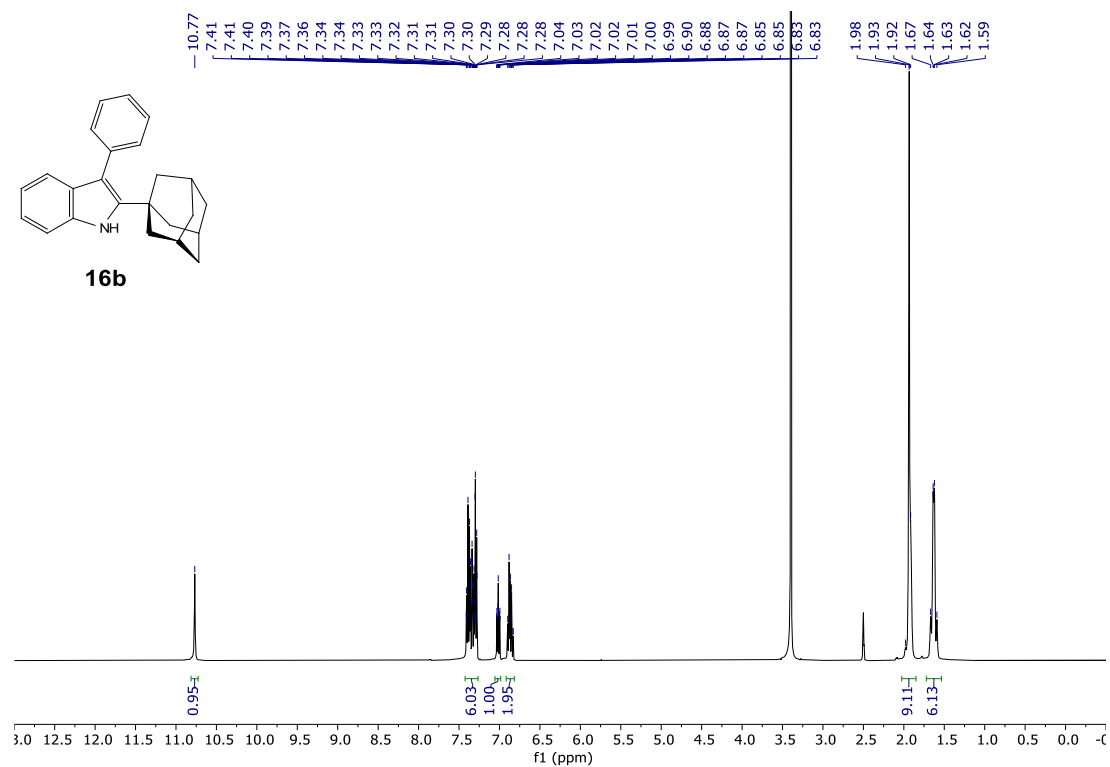

**Figure S67.**  $^1\text{H}$  NMR spectrum (400 MHz) of 2-(adamantan-1-yl)-3-phenyl-1H-indole (**16b**) in  $\text{DMSO-}d_6$

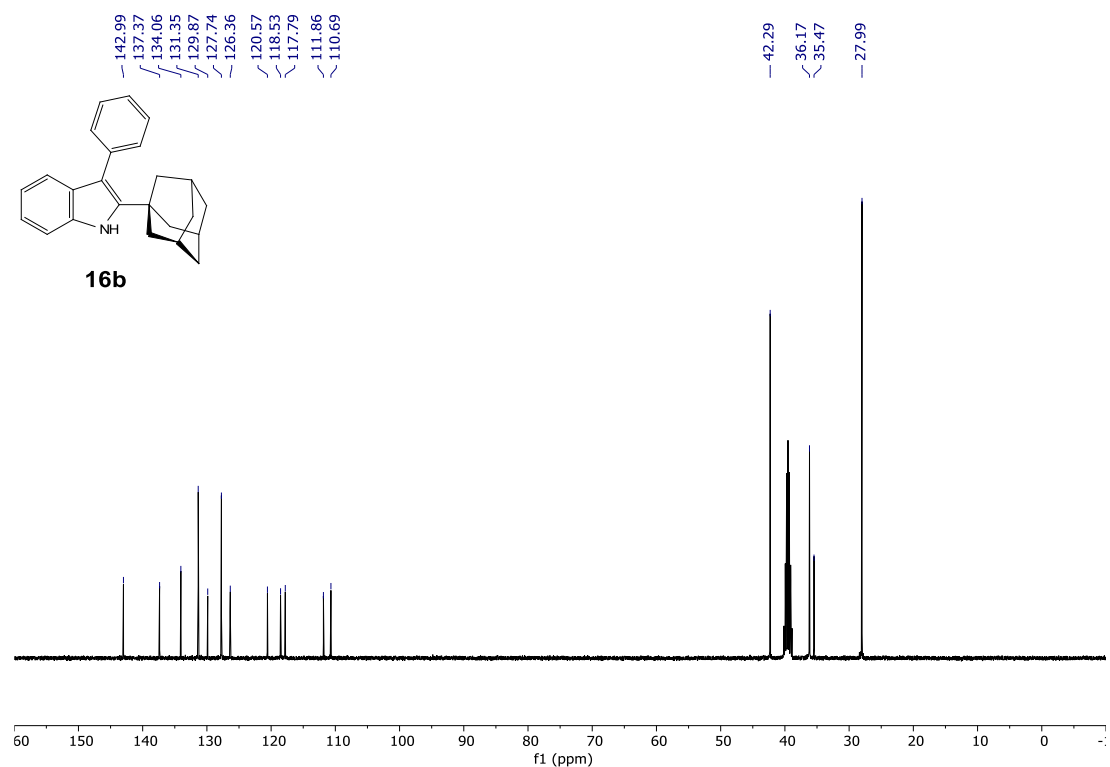

**Figure S68.**  $^{13}\text{C}\{^1\text{H}\}$  NMR spectrum (100 MHz) of 2-(adamantan-1-yl)-3-phenyl-1H-indole (**16b**) in  $\text{DMSO-}d_6$

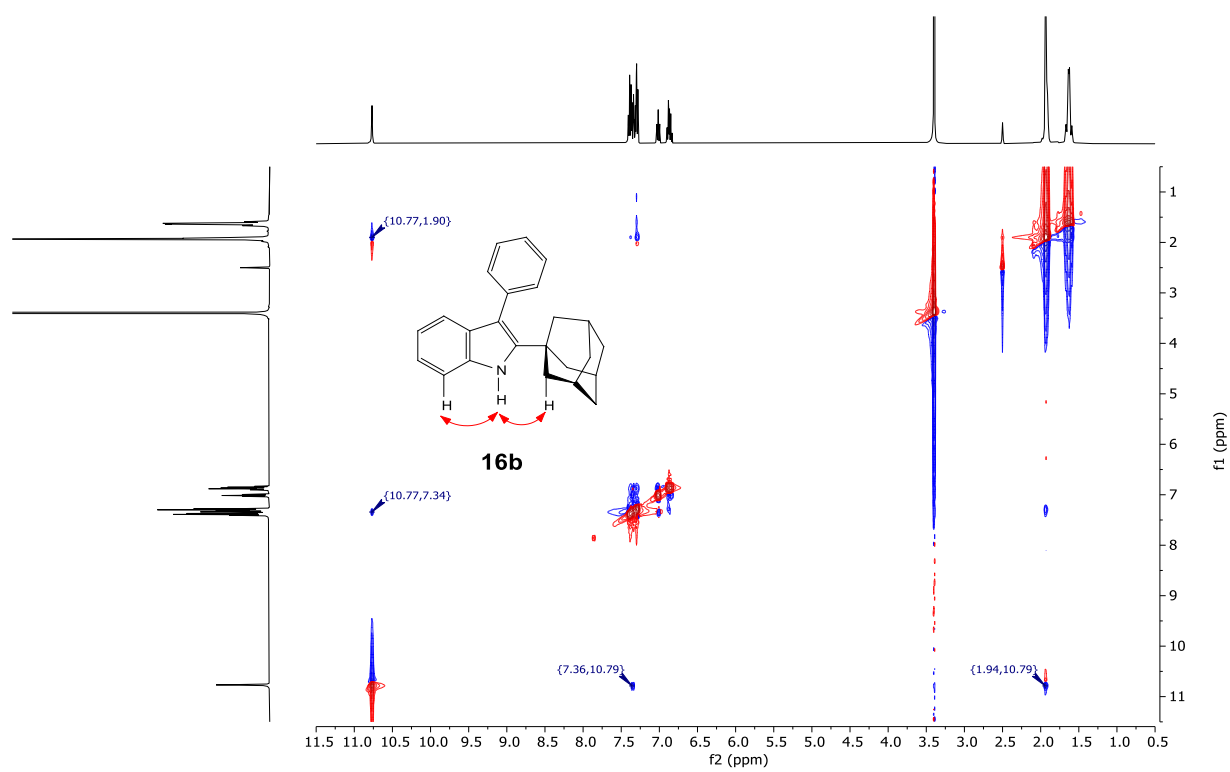

**Figure S69.** NOESY spectrum of 2-(adamantan-1-yl)-3-phenyl-1H-indole (**16b**) in DMSO- $d_6$

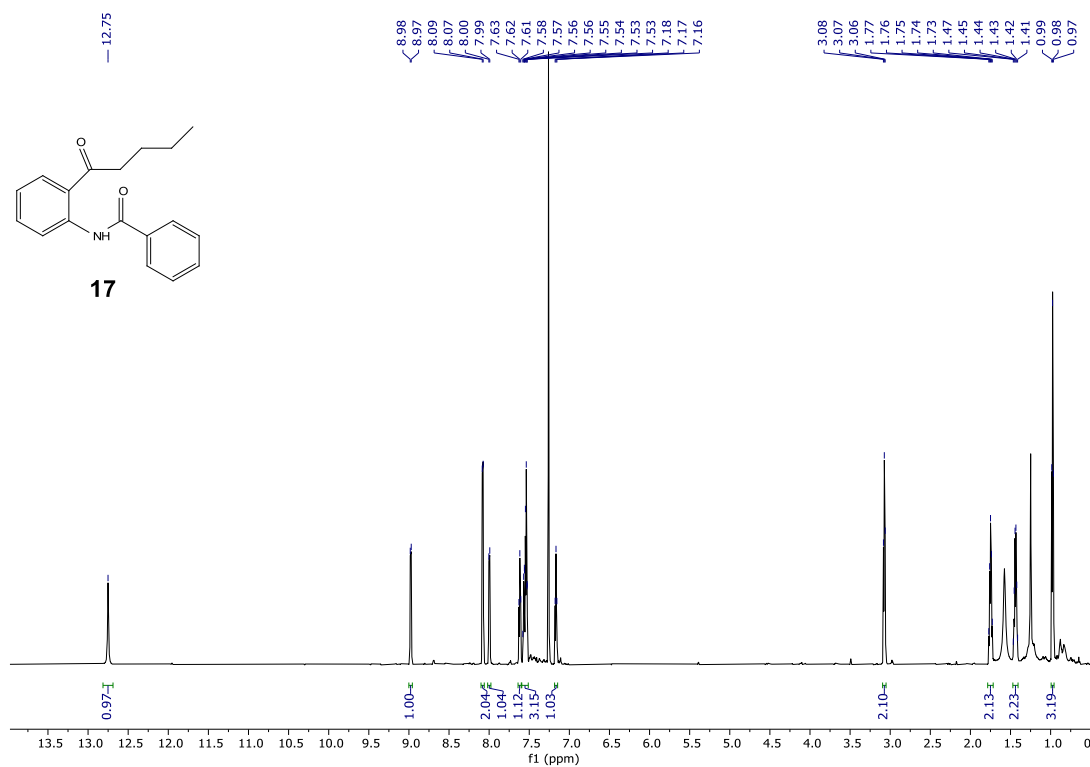

**Figure S70.**  $^1\text{H}$  NMR spectrum (700 MHz) of *N*-(2-pentanoylphenyl)benzamide (17) in  $\text{CDCl}_3$

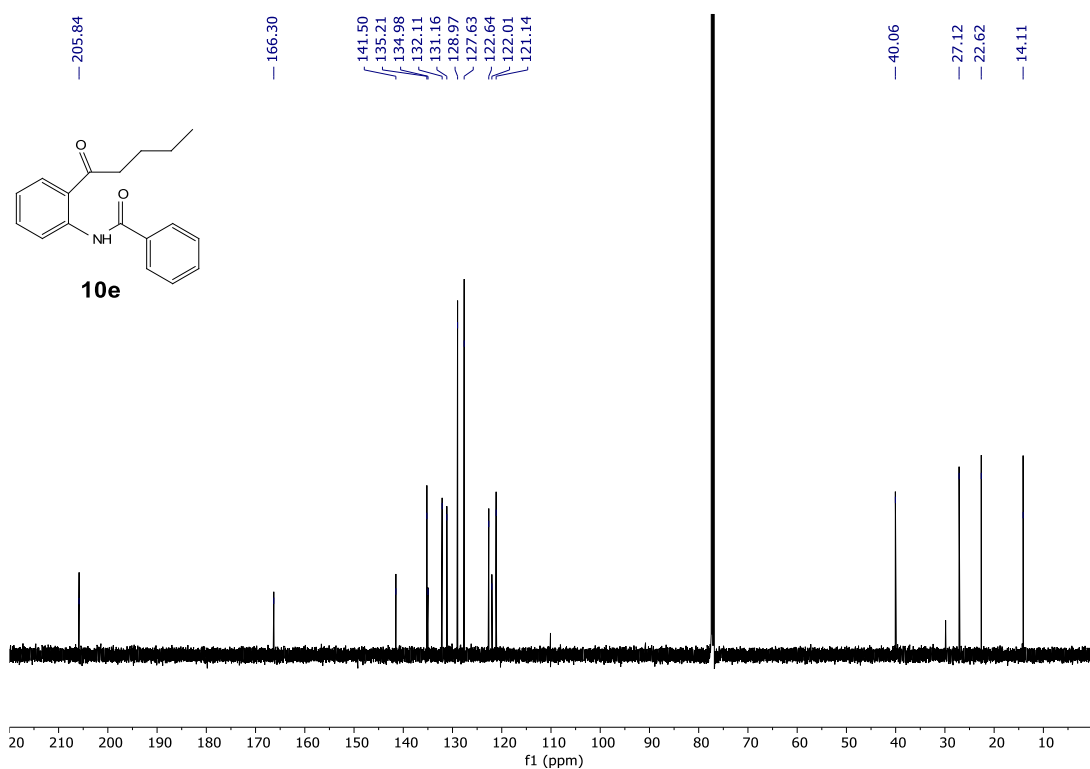

**Figure S71.**  $^{13}\text{C}\{^1\text{H}\}$  NMR spectrum (175 MHz) of *N*-(2-pentanoylphenyl)benzamide (17) in  $\text{CDCl}_3$



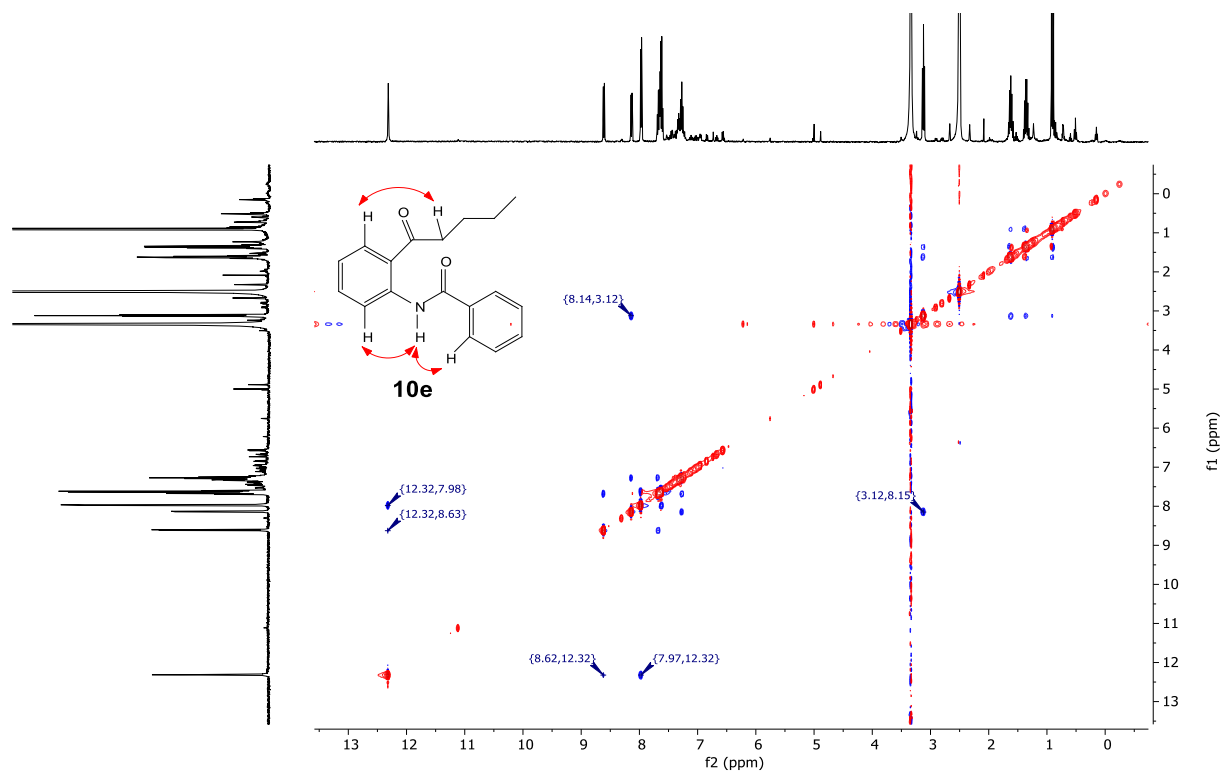

**Figure S72.** NOESY spectrum of *N*-(2-pentanoylphenyl)benzamide (**17**) in  $\text{CDCl}_3$

## NMR spectra of the crude reaction mixtures from the Larock heteroannulation reaction

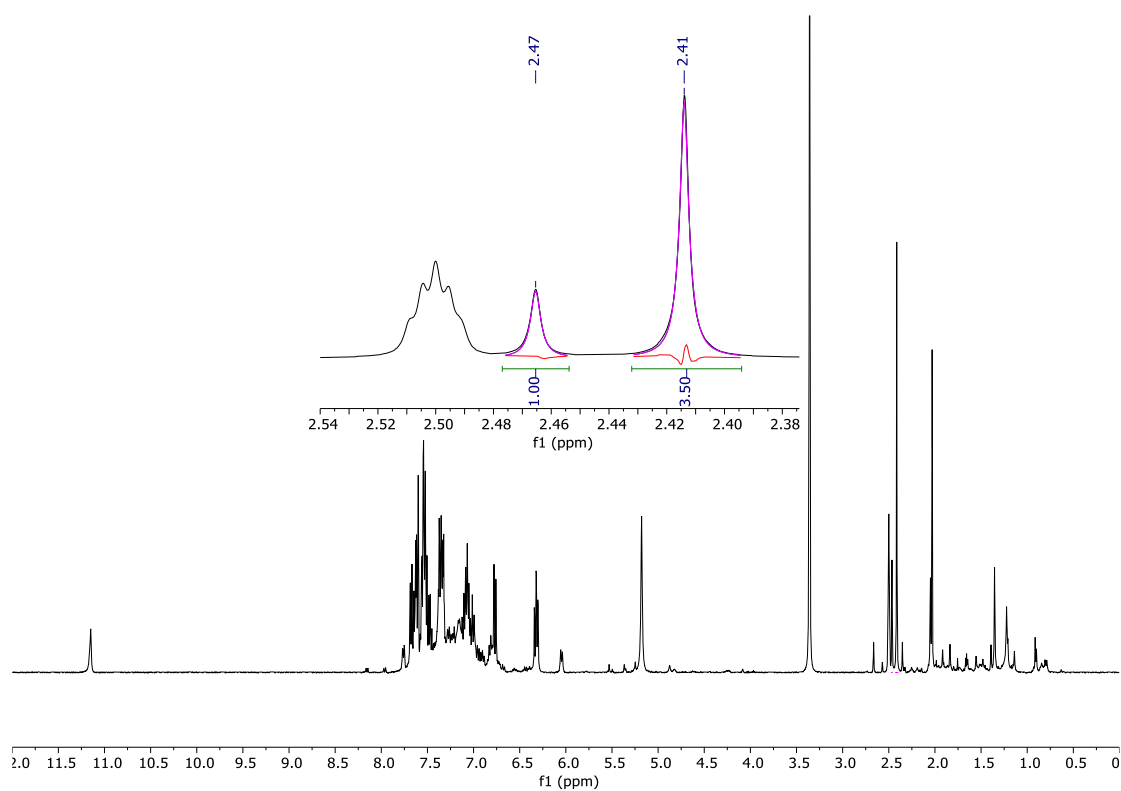

**Figure S73.** <sup>1</sup>H NMR spectrum (400 MHz) of the crude reaction mixtures of **9a** and **9b** in DMSO-*d*<sub>6</sub>

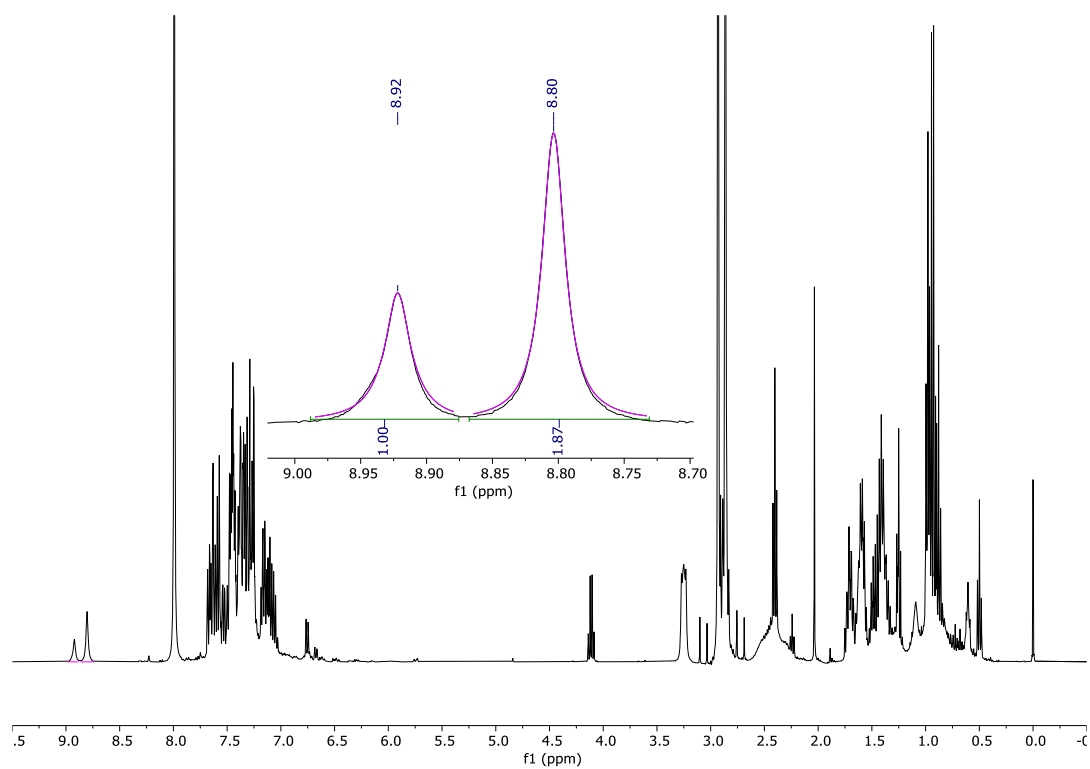

**Figure S74.** <sup>1</sup>H NMR spectrum (400 MHz) of the crude reaction mixtures of **10a** and **10b** in CDCl<sub>3</sub>

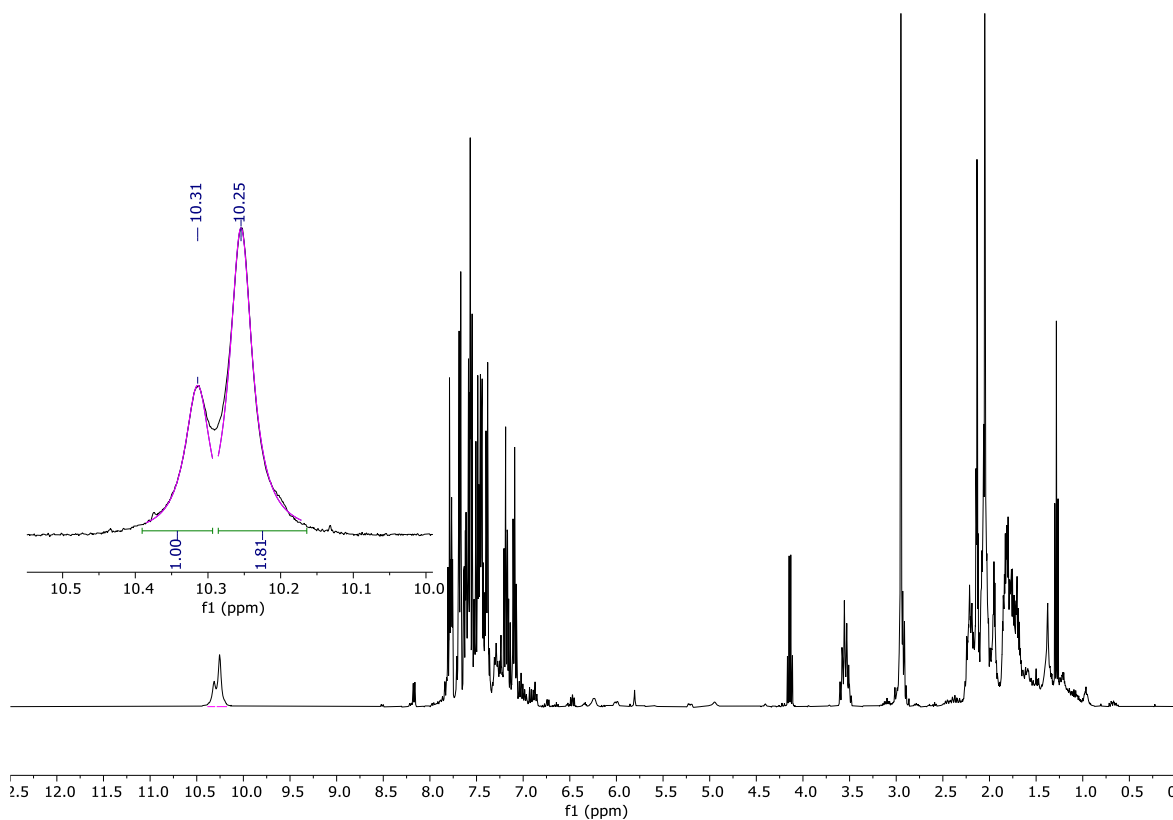

**Figure S75.**  $^1\text{H}$  NMR spectrum (400 MHz) of the crude reaction mixtures of **11a** and **11b** in acetone- $d_6$

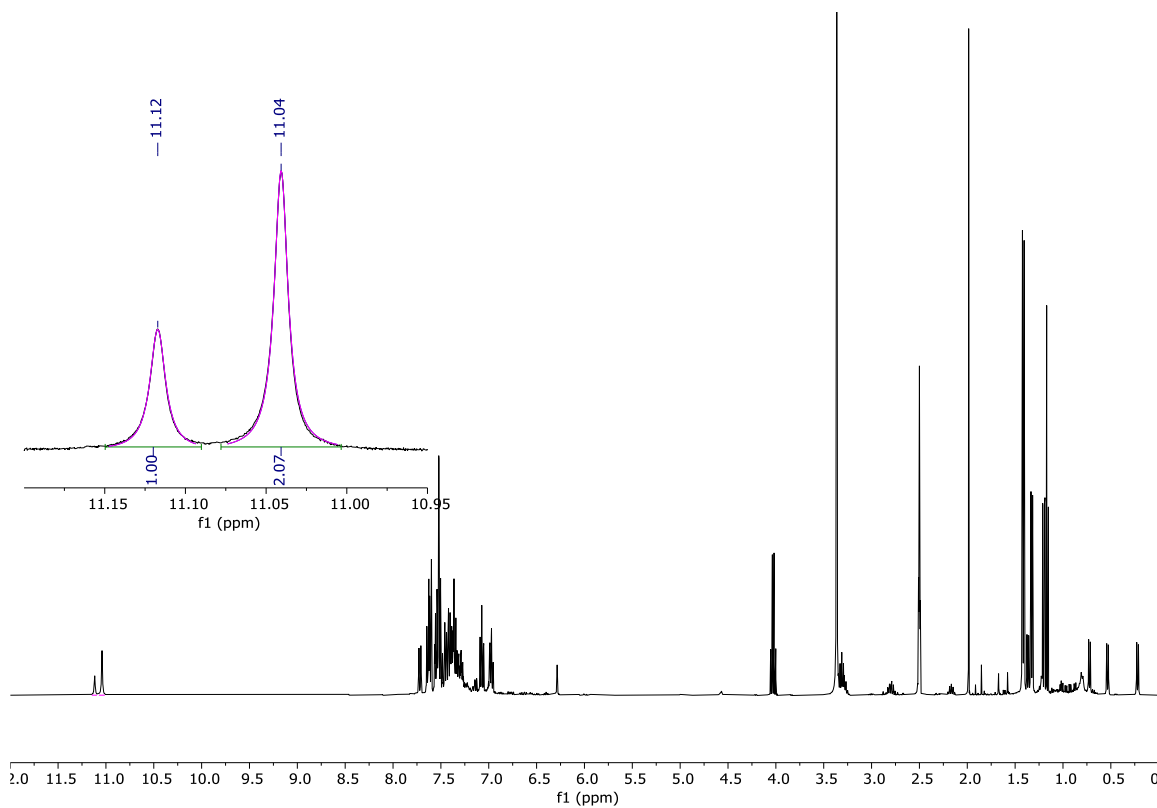

**Figure S76.**  $^1\text{H}$  NMR spectrum (400 MHz) of the crude reaction mixtures of **12a** and **12b** in DMSO- $d_6$

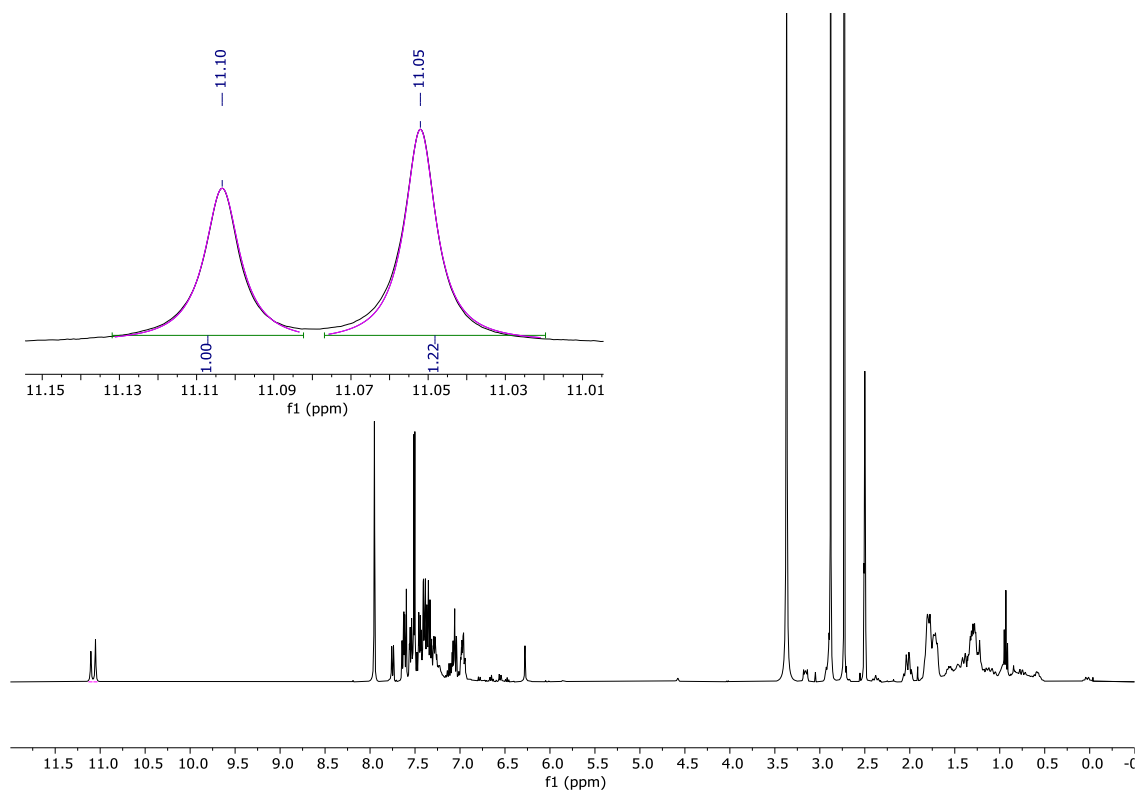

**Figure S77.**  $^1\text{H}$  NMR spectrum (400 MHz) of the crude reaction mixtures of **13a** and **13b** in  $\text{DMSO-}d_6$

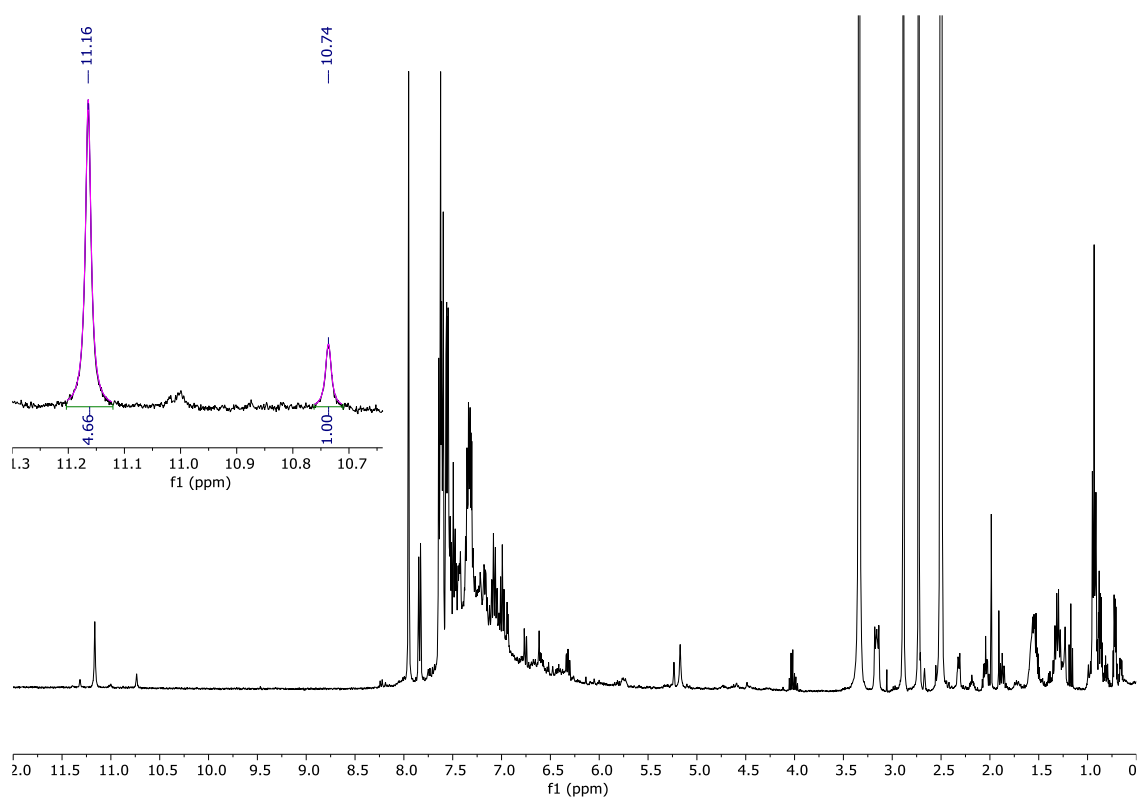

**Figure S78.**  $^1\text{H}$  NMR spectrum (400 MHz) of the crude reaction mixtures of **14a** and **14b** in  $\text{DMSO-}d_6$

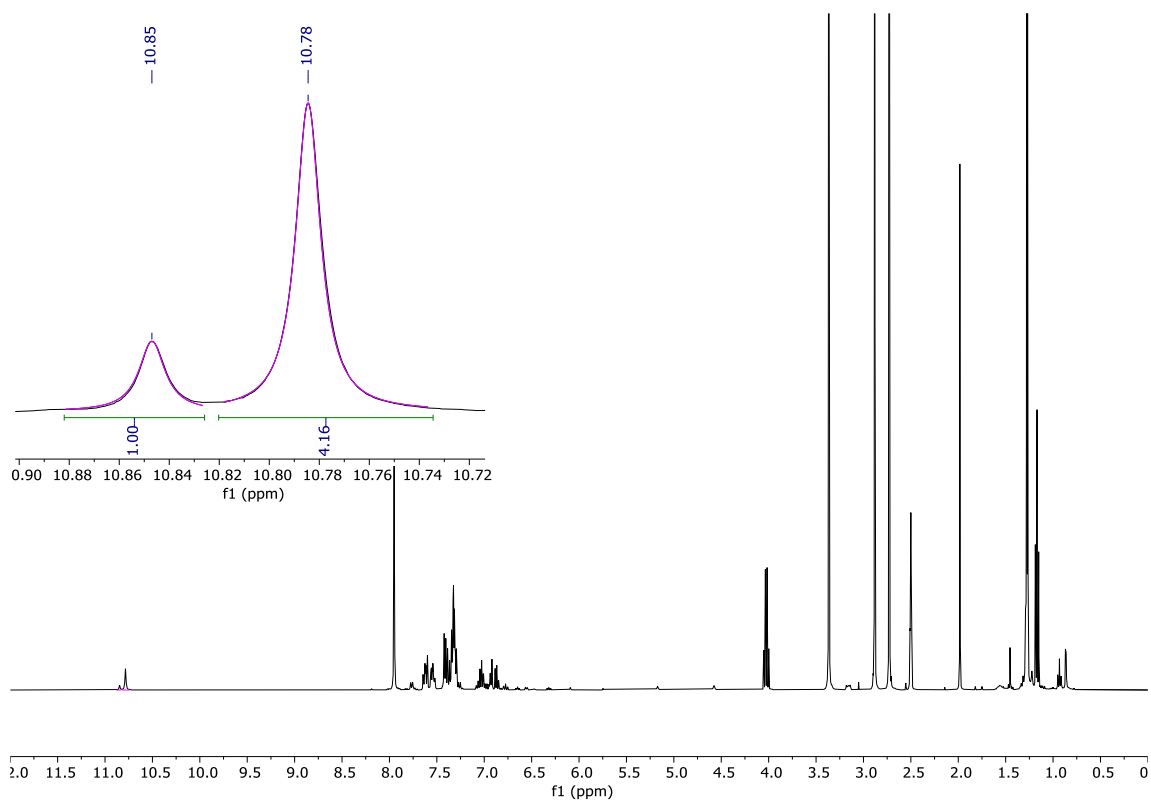

**Figure S79.**  $^1\text{H}$  NMR spectrum (400 MHz) of the crude reaction mixtures of **15a** and **15b** in  $\text{DMSO-}d_6$

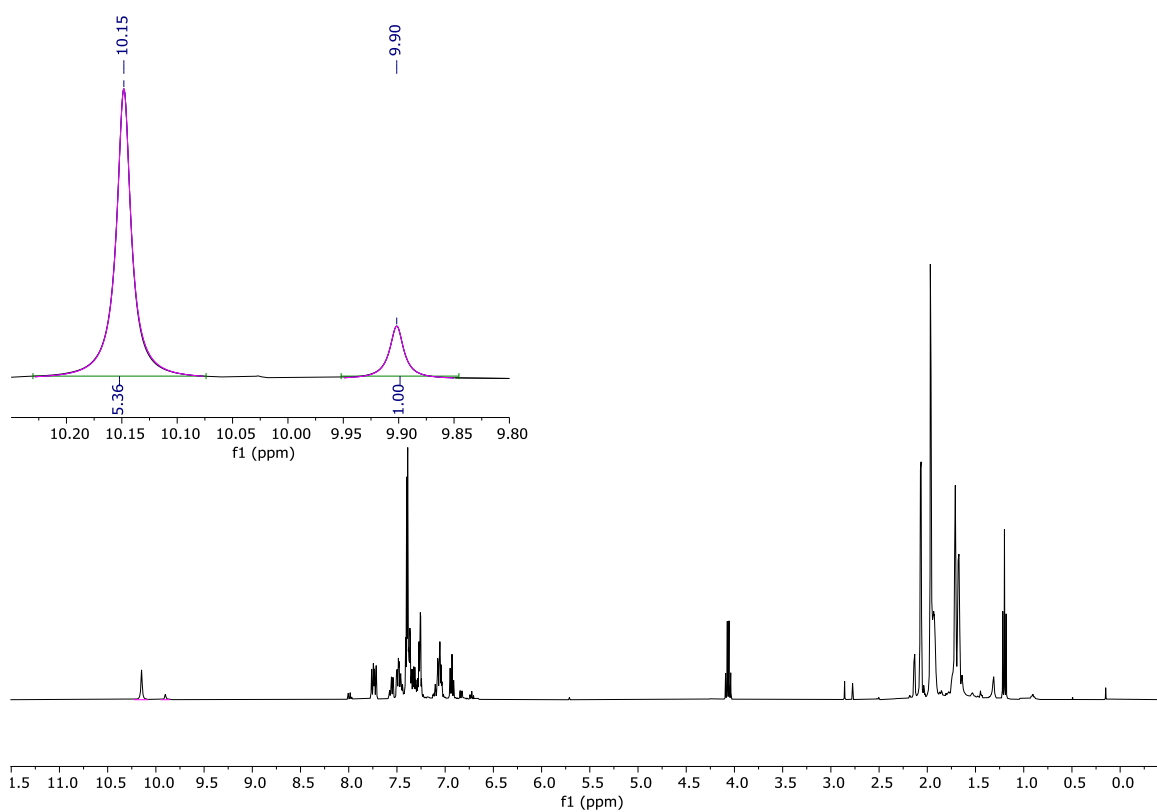

**Figure S80.**  $^1\text{H}$  NMR spectrum (400 MHz) of the crude reaction mixtures of **16a** and **16b** in  $\text{DMSO-}d_6$

## Energy and coordinate for all calculated structures

| M06                                                                                       |             |             |             |
|-------------------------------------------------------------------------------------------|-------------|-------------|-------------|
| <b>ADS complex of prop-1-yn-1-ylbenzene</b>                                               |             |             |             |
| Energy = -1134654.927677 kcal/mol                                                         |             |             |             |
| Electronic Energy + Thermal Free Energy Correction (353.150 K) = -1134385.531788 kcal/mol |             |             |             |
| Symmetry c1                                                                               |             |             |             |
| Pd                                                                                        | 0.53865200  | -0.30121700 | -0.79930600 |
| P                                                                                         | -1.31687100 | 0.30834500  | 0.46957500  |
| I                                                                                         | -0.09817800 | -3.04311700 | -0.85438800 |
| C                                                                                         | 1.00800100  | 1.68246700  | -0.87112400 |
| C                                                                                         | 1.84931000  | 2.22425800  | 0.09291200  |
| C                                                                                         | 0.54632400  | 2.47857100  | -1.93152100 |
| C                                                                                         | 2.27255600  | 3.55314300  | 0.01257200  |
| H                                                                                         | 2.19001000  | 1.60623900  | 0.92629100  |
| C                                                                                         | 0.98888200  | 3.80712800  | -2.01377700 |
| C                                                                                         | 1.84178200  | 4.33734300  | -1.05356900 |
| H                                                                                         | 2.93418600  | 3.96156200  | 0.77365800  |
| H                                                                                         | 0.63943500  | 4.42616300  | -2.84076600 |
| H                                                                                         | 2.16609700  | 5.37250300  | -1.13898500 |
| N                                                                                         | -0.40329700 | 2.00947100  | -2.84130200 |
| H                                                                                         | -0.44670300 | 1.00099100  | -2.92586200 |
| H                                                                                         | -0.39442500 | 2.46627300  | -3.74441300 |
| C                                                                                         | 2.84696000  | -0.72885500 | -1.30620900 |
| C                                                                                         | 2.28265000  | -0.74004500 | -2.39609500 |
| C                                                                                         | 3.61136800  | -0.63099900 | -0.09922600 |
| C                                                                                         | 4.63973000  | 0.31955100  | -0.01757200 |
| C                                                                                         | 3.31640700  | -1.43109700 | 1.01492700  |
| C                                                                                         | 5.35216300  | 0.47289200  | 1.16437300  |
| H                                                                                         | 4.85596500  | 0.94332800  | -0.88196900 |
| C                                                                                         | 4.02963200  | -1.26478000 | 2.19499700  |
| H                                                                                         | 2.51370300  | -2.16417900 | 0.94530400  |
| C                                                                                         | 5.04440300  | -0.31230900 | 2.27319900  |
| H                                                                                         | 6.14444500  | 1.21470500  | 1.22432400  |
| H                                                                                         | 3.79126600  | -1.88103100 | 3.05860000  |
| C                                                                                         | -1.38398200 | 1.99465000  | 1.17135400  |
| C                                                                                         | -1.08214300 | 2.25030600  | 2.51015700  |
| C                                                                                         | -1.66805700 | 3.06430900  | 0.31279000  |
| C                                                                                         | -1.05493100 | 3.56022700  | 2.98328800  |
| H                                                                                         | -0.86741700 | 1.43120700  | 3.19261600  |
| C                                                                                         | -1.64592900 | 4.36731200  | 0.79141900  |
| H                                                                                         | -1.89295400 | 2.87794200  | -0.73753300 |
| C                                                                                         | -1.33269400 | 4.61871000  | 2.12621500  |
| H                                                                                         | -0.81922100 | 3.74911400  | 4.02782000  |
| H                                                                                         | -1.86047900 | 5.19137000  | 0.11492500  |
| H                                                                                         | -1.30880500 | 5.64074800  | 2.49659900  |
| C                                                                                         | -1.34560700 | -0.81334300 | 1.91000300  |
| C                                                                                         | -2.47317100 | -1.55428800 | 2.26388900  |
| C                                                                                         | -0.15251200 | -0.98839900 | 2.62181200  |
| C                                                                                         | -2.40340800 | -2.46761400 | 3.31357600  |
| H                                                                                         | -3.40320800 | -1.43818400 | 1.71114900  |
| C                                                                                         | -0.08886700 | -1.89204500 | 3.67377000  |
| H                                                                                         | 0.73820300  | -0.42697400 | 2.33491000  |
| C                                                                                         | -1.21466100 | -2.63981600 | 4.01532600  |
| H                                                                                         | -3.28249400 | -3.04984500 | 3.57868500  |
| H                                                                                         | 0.84320900  | -2.02237600 | 4.21870900  |
| H                                                                                         | -1.16293200 | -3.35853900 | 4.82946000  |
| C                                                                                         | -2.91996000 | 0.13133200  | -0.38052900 |
| C                                                                                         | -2.99933900 | -0.53514600 | -1.60529700 |

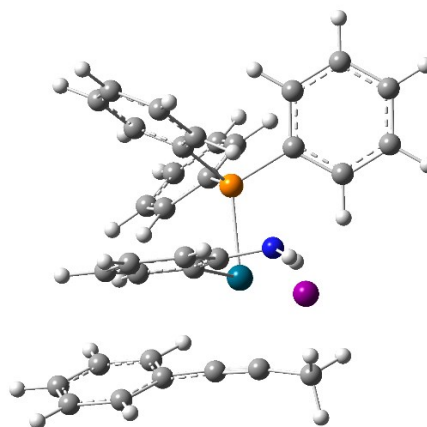

|                                                                                           |             |             |             |
|-------------------------------------------------------------------------------------------|-------------|-------------|-------------|
| C                                                                                         | -4.08375600 | 0.65464000  | 0.19743700  |
| C                                                                                         | -4.22731800 | -0.68459500 | -2.24294700 |
| H                                                                                         | -2.09335500 | -0.94412500 | -2.05140200 |
| C                                                                                         | -5.30913400 | 0.49834100  | -0.43931800 |
| H                                                                                         | -4.02968100 | 1.18651200  | 1.14644800  |
| C                                                                                         | -5.38099100 | -0.17028300 | -1.65963900 |
| H                                                                                         | -4.28053100 | -1.20169900 | -3.19766900 |
| H                                                                                         | -6.20963800 | 0.90334000  | 0.01543500  |
| H                                                                                         | -6.34045200 | -0.28678500 | -2.15774100 |
| C                                                                                         | 1.79757700  | -0.82928700 | -3.76566500 |
| H                                                                                         | 5.59664900  | -0.18279500 | 3.20068900  |
| H                                                                                         | 0.98369800  | -1.55958600 | -3.84295200 |
| H                                                                                         | 2.60597600  | -1.14076700 | -4.43617100 |
| H                                                                                         | 1.42336800  | 0.14093100  | -4.11322100 |
| <b>TS1 complex of prop-1-yn-1-ylbenzene</b>                                               |             |             |             |
| Energy = -1134639.150218 kcal/mol                                                         |             |             |             |
| Electronic Energy + Thermal Free Energy Correction (353.150 K) = -1134369.567959 kcal/mol |             |             |             |
| Imaginary frequency = -310.06 cm <sup>-1</sup>                                            |             |             |             |
| Symmetry c1                                                                               |             |             |             |
| Pd                                                                                        | -0.38585800 | -0.93386700 | -0.32684200 |
| P                                                                                         | 1.34702200  | 0.69015800  | 0.16820500  |
| I                                                                                         | 1.40714500  | -2.99177900 | 0.00074100  |
| C                                                                                         | -1.73288100 | 0.58561100  | -0.80317400 |
| C                                                                                         | -1.93787500 | 0.83664900  | -2.16120100 |
| C                                                                                         | -2.06311900 | 1.55944800  | 0.15925000  |
| C                                                                                         | -2.43626700 | 2.06427100  | -2.59124200 |
| H                                                                                         | -1.72317700 | 0.05013300  | -2.88420900 |
| C                                                                                         | -2.57538600 | 2.78652700  | -0.28505900 |
| C                                                                                         | -2.75315800 | 3.03418500  | -1.63934300 |
| H                                                                                         | -2.58916700 | 2.25395300  | -3.65074500 |
| H                                                                                         | -2.81428100 | 3.55342500  | 0.45177400  |
| H                                                                                         | -3.15127400 | 3.99627900  | -1.95525300 |
| N                                                                                         | -1.83944300 | 1.32682900  | 1.50048500  |
| H                                                                                         | -1.77452100 | 0.35601600  | 1.77871700  |
| H                                                                                         | -2.35420300 | 1.90343700  | 2.15181300  |
| C                                                                                         | -2.69672600 | -1.30903400 | -0.44987800 |
| C                                                                                         | -1.95453800 | -2.25850200 | -0.84154200 |
| C                                                                                         | -3.95074000 | -0.89113400 | 0.15023800  |
| C                                                                                         | -4.80531000 | 0.02893600  | -0.46965700 |
| C                                                                                         | -4.33577700 | -1.48421200 | 1.36007400  |
| C                                                                                         | -6.02906200 | 0.33676500  | 0.10845800  |
| H                                                                                         | -4.49895400 | 0.49602600  | -1.40363300 |
| C                                                                                         | -5.55995700 | -1.16611800 | 1.93714800  |
| H                                                                                         | -3.66323500 | -2.19425100 | 1.83769100  |
| C                                                                                         | -6.40782700 | -0.25597700 | 1.31230400  |
| H                                                                                         | -6.69258200 | 1.04560000  | -0.38076400 |
| H                                                                                         | -5.85022800 | -1.62910300 | 2.87699400  |
| C                                                                                         | 1.05550200  | 2.49020600  | -0.08605700 |
| C                                                                                         | 1.21766800  | 3.08029800  | -1.34259400 |
| C                                                                                         | 0.62188300  | 3.28435300  | 0.98226900  |
| C                                                                                         | 0.94854000  | 4.43338100  | -1.52798700 |
| H                                                                                         | 1.56646300  | 2.49016000  | -2.18761500 |
| C                                                                                         | 0.36148200  | 4.63670400  | 0.79627100  |
| H                                                                                         | 0.47707100  | 2.84127300  | 1.96463400  |
| C                                                                                         | 0.52297200  | 5.21554600  | -0.45979000 |
| H                                                                                         | 1.08362000  | 4.87724200  | -2.51167800 |
| H                                                                                         | 0.03258600  | 5.24103500  | 1.63873700  |
| H                                                                                         | 0.32089700  | 6.27438500  | -0.60398200 |
| C                                                                                         | 2.71755600  | 0.31869300  | -0.99486200 |

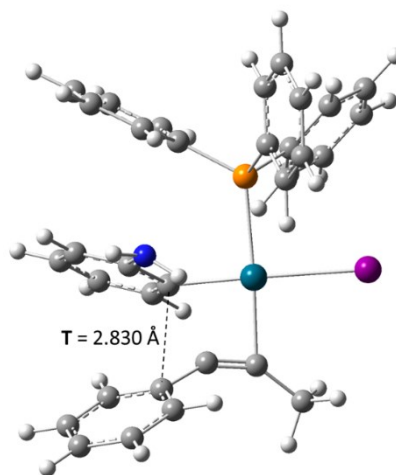

|                                                                                           |             |             |             |
|-------------------------------------------------------------------------------------------|-------------|-------------|-------------|
| C                                                                                         | 4.05342000  | 0.19176200  | -0.61167900 |
| C                                                                                         | 2.36967400  | 0.08053700  | -2.33138700 |
| C                                                                                         | 5.02254900  | -0.16538900 | -1.54682100 |
| H                                                                                         | 4.34602800  | 0.34548800  | 0.42438700  |
| C                                                                                         | 3.33952200  | -0.25948900 | -3.26670500 |
| H                                                                                         | 1.32273300  | 0.13468600  | -2.63508700 |
| C                                                                                         | 4.66983900  | -0.38921000 | -2.87336100 |
| H                                                                                         | 6.05793100  | -0.27174400 | -1.23194700 |
| H                                                                                         | 3.05411600  | -0.43997700 | -4.30027000 |
| H                                                                                         | 5.42841500  | -0.66955400 | -3.60008400 |
| C                                                                                         | 2.05235000  | 0.63771100  | 1.85364900  |
| C                                                                                         | 3.06530700  | 1.51842100  | 2.25681800  |
| C                                                                                         | 1.53571900  | -0.27363100 | 2.77729400  |
| C                                                                                         | 3.56910600  | 1.46342800  | 3.55080600  |
| H                                                                                         | 3.45531400  | 2.25908500  | 1.55968200  |
| C                                                                                         | 2.03704200  | -0.32387400 | 4.07540600  |
| H                                                                                         | 0.73620700  | -0.94694400 | 2.46958800  |
| C                                                                                         | 3.05749300  | 0.53989300  | 4.46021000  |
| H                                                                                         | 4.35885700  | 2.14702200  | 3.85245800  |
| H                                                                                         | 1.62677100  | -1.03715400 | 4.78607500  |
| H                                                                                         | 3.45061200  | 0.50035300  | 5.47324600  |
| C                                                                                         | -1.88224100 | -3.63150200 | -1.36615000 |
| H                                                                                         | -7.36498300 | -0.00610500 | 1.76360400  |
| H                                                                                         | -1.27882100 | -3.68064600 | -2.27900800 |
| H                                                                                         | -2.88988300 | -4.00122200 | -1.58976000 |
| H                                                                                         | -1.41130200 | -4.29843200 | -0.63662300 |
| <b>INT1 complex of prop-1-yn-1-ylbenzene</b>                                              |             |             |             |
| Energy = -1134673.951240 kcal/mol                                                         |             |             |             |
| Electronic Energy + Thermal Free Energy Correction (353.150 K) = -1134403.256407 kcal/mol |             |             |             |
| Symmetry c1                                                                               |             |             |             |
| Pd                                                                                        | -0.54885900 | -0.63316100 | -0.10582300 |
| P                                                                                         | 1.71137300  | 0.41465400  | 0.02834400  |
| I                                                                                         | 0.54772400  | -3.03847900 | 0.11370200  |
| C                                                                                         | -2.23504800 | 0.95092500  | -0.32419900 |
| C                                                                                         | -1.66418300 | 1.23009600  | -1.59211900 |
| C                                                                                         | -2.13441300 | 1.93924000  | 0.70543700  |
| C                                                                                         | -1.00348400 | 2.42810300  | -1.84550600 |
| H                                                                                         | -1.81976200 | 0.50213400  | -2.38703700 |
| C                                                                                         | -1.49647200 | 3.14996200  | 0.41742800  |
| C                                                                                         | -0.94407800 | 3.38379000  | -0.83537900 |
| H                                                                                         | -0.56459500 | 2.62160700  | -2.82089700 |
| H                                                                                         | -1.42281800 | 3.90765400  | 1.19639500  |
| H                                                                                         | -0.44346400 | 4.33287300  | -1.01808300 |
| N                                                                                         | -2.63688500 | 1.68446300  | 1.95242000  |
| H                                                                                         | -3.31201000 | 0.93932500  | 2.05073100  |
| H                                                                                         | -2.77899600 | 2.47024800  | 2.56993400  |
| C                                                                                         | -3.14225500 | -0.23834000 | -0.16108700 |
| C                                                                                         | -2.45175700 | -1.38521700 | -0.19296400 |
| C                                                                                         | -4.59821000 | -0.01799200 | -0.03748600 |
| C                                                                                         | -5.19159200 | 1.07519600  | -0.68461800 |
| C                                                                                         | -5.41012200 | -0.85313500 | 0.74248400  |
| C                                                                                         | -6.55774800 | 1.30660000  | -0.58297000 |
| H                                                                                         | -4.57054700 | 1.74301700  | -1.28158600 |
| C                                                                                         | -6.77770900 | -0.62037600 | 0.84316300  |
| H                                                                                         | -4.95887000 | -1.67598700 | 1.29376600  |
| C                                                                                         | -7.35741800 | 0.45661000  | 0.17773200  |
| H                                                                                         | -7.00172500 | 2.15455200  | -1.09970600 |
| H                                                                                         | -7.39155200 | -1.27665000 | 1.45600400  |
| C                                                                                         | 2.01759200  | 2.22763900  | -0.06365600 |

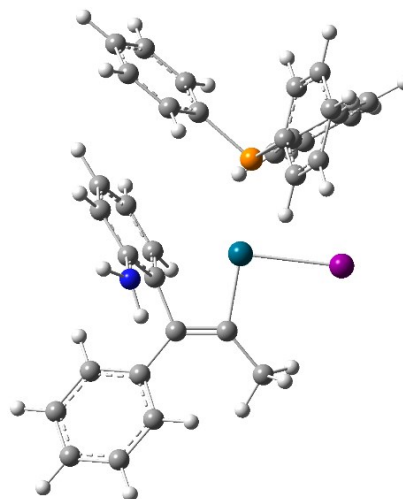



|                                                                                           |             |             |             |
|-------------------------------------------------------------------------------------------|-------------|-------------|-------------|
| C                                                                                         | 2.55488900  | 2.86724900  | -1.18185600 |
| C                                                                                         | 1.67997900  | 2.99310000  | 1.05910200  |
| C                                                                                         | 2.75818400  | 4.24569600  | -1.17405300 |
| H                                                                                         | 2.82822000  | 2.29105300  | -2.06352200 |
| C                                                                                         | 1.89035700  | 4.36593500  | 1.06914600  |
| H                                                                                         | 1.24598600  | 2.51073000  | 1.93623800  |
| C                                                                                         | 2.43059500  | 4.99689100  | -0.04991900 |
| H                                                                                         | 3.18409200  | 4.73024300  | -2.04965300 |
| H                                                                                         | 1.62742200  | 4.94577200  | 1.95106100  |
| H                                                                                         | 2.59666400  | 6.07146300  | -0.04360500 |
| C                                                                                         | 2.64553500  | -0.27263600 | -1.38942200 |
| C                                                                                         | 3.80585200  | -1.03802200 | -1.26131200 |
| C                                                                                         | 2.07561800  | -0.11157800 | -2.65995400 |
| C                                                                                         | 4.39194900  | -1.62006200 | -2.38337700 |
| H                                                                                         | 4.24985800  | -1.19985000 | -0.28135400 |
| C                                                                                         | 2.66867500  | -0.68171300 | -3.77981900 |
| H                                                                                         | 1.15321800  | 0.46005800  | -2.77169800 |
| C                                                                                         | 3.82820200  | -1.44173700 | -3.64229000 |
| H                                                                                         | 5.29295400  | -2.21806000 | -2.26923700 |
| H                                                                                         | 2.21861600  | -0.54196800 | -4.75979400 |
| H                                                                                         | 4.28771300  | -1.89811600 | -4.51570500 |
| C                                                                                         | 2.67331000  | 0.02441900  | 1.53918200  |
| C                                                                                         | 4.00244700  | 0.44169500  | 1.68578400  |
| C                                                                                         | 2.03840200  | -0.61670400 | 2.60494900  |
| C                                                                                         | 4.69087000  | 0.18861300  | 2.86612900  |
| H                                                                                         | 4.49899100  | 0.97377500  | 0.87451800  |
| C                                                                                         | 2.72504900  | -0.85889500 | 3.79272700  |
| H                                                                                         | 1.00056200  | -0.93031400 | 2.49581800  |
| C                                                                                         | 4.05214800  | -0.46316100 | 3.92003500  |
| H                                                                                         | 5.72511400  | 0.50821600  | 2.96833100  |
| H                                                                                         | 2.22048900  | -1.35634100 | 4.61748800  |
| H                                                                                         | 4.59051500  | -0.65492300 | 4.84525000  |
| C                                                                                         | -2.93731900 | -2.78651300 | -0.20987200 |
| H                                                                                         | -8.42625200 | 0.63886300  | 0.25978100  |
| H                                                                                         | -2.39126200 | -3.39234600 | -0.94147500 |
| H                                                                                         | -4.00836500 | -2.82358600 | -0.45432700 |
| H                                                                                         | -2.79154200 | -3.27373100 | 0.76331500  |
| <b>TS2 complex of prop-1-yn-1-ylbenzene</b>                                               |             |             |             |
| Energy = -1134638.393442 kcal/mol                                                         |             |             |             |
| Electronic Energy + Thermal Free Energy Correction (353.150 K) = -1134368.498684 kcal/mol |             |             |             |
| Imaginary frequency = -333.74 cm <sup>-1</sup>                                            |             |             |             |
| Symmetry c1                                                                               |             |             |             |
| Pd                                                                                        | -0.66098100 | 0.41239900  | -0.28421000 |
| P                                                                                         | 1.49215000  | -0.58407700 | 0.04662200  |
| I                                                                                         | -1.84655600 | -2.06898500 | -0.24194800 |
| C                                                                                         | 0.14226200  | 2.34595900  | -0.31916500 |
| C                                                                                         | 0.99949000  | 2.73726800  | -1.35619700 |
| C                                                                                         | 0.10823900  | 3.09583900  | 0.87677200  |
| C                                                                                         | 1.76486900  | 3.88935800  | -1.26509100 |
| H                                                                                         | 1.03276500  | 2.13400100  | -2.26472800 |
| C                                                                                         | 0.88035800  | 4.26879300  | 0.95274300  |
| C                                                                                         | 1.68692100  | 4.66149100  | -0.10301200 |
| H                                                                                         | 2.41698900  | 4.18308200  | -2.08400600 |
| H                                                                                         | 0.84349000  | 4.86197000  | 1.86623400  |
| H                                                                                         | 2.27404300  | 5.57310400  | -0.01425300 |
| N                                                                                         | -0.69999400 | 2.73091900  | 1.93840700  |
| H                                                                                         | -0.86818500 | 1.73890200  | 2.04207100  |
| H                                                                                         | -0.50077500 | 3.18870200  | 2.81760600  |
| C                                                                                         | -2.53370900 | 1.43881000  | -0.46458200 |

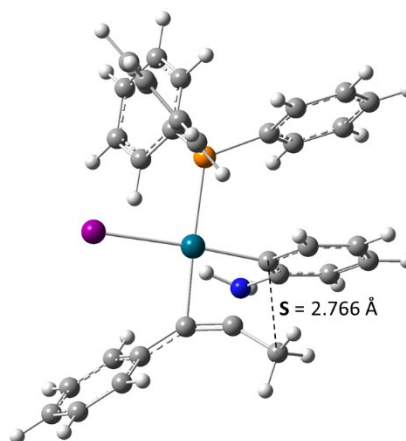

|                                                                                           |             |             |             |
|-------------------------------------------------------------------------------------------|-------------|-------------|-------------|
| C                                                                                         | -1.83385100 | 2.32618000  | -1.03089900 |
| C                                                                                         | -3.82361200 | 0.92673700  | -0.06282400 |
| C                                                                                         | -4.17182700 | 0.87984500  | 1.29296800  |
| C                                                                                         | -4.73366300 | 0.46886800  | -1.02403400 |
| C                                                                                         | -5.41214000 | 0.38835100  | 1.67843900  |
| H                                                                                         | -3.45540700 | 1.22766700  | 2.03537400  |
| C                                                                                         | -5.97100900 | -0.02691700 | -0.63076600 |
| H                                                                                         | -4.45439800 | 0.49497000  | -2.07541600 |
| C                                                                                         | -6.31284200 | -0.07073500 | 0.71912600  |
| H                                                                                         | -5.67594500 | 0.35838300  | 2.73291300  |
| H                                                                                         | -6.67177100 | -0.38307700 | -1.38220300 |
| C                                                                                         | 2.96333500  | 0.48971100  | -0.13719500 |
| C                                                                                         | 3.80870400  | 0.42999900  | -1.24667600 |
| C                                                                                         | 3.20660400  | 1.44301000  | 0.85866200  |
| C                                                                                         | 4.88276200  | 1.31015600  | -1.35723700 |
| H                                                                                         | 3.63858600  | -0.30888800 | -2.02714600 |
| C                                                                                         | 4.27765900  | 2.31887100  | 0.74552700  |
| H                                                                                         | 2.54685500  | 1.50657600  | 1.72460300  |
| C                                                                                         | 5.11771200  | 2.25521700  | -0.36470900 |
| H                                                                                         | 5.53842600  | 1.25212300  | -2.22290200 |
| H                                                                                         | 4.45171200  | 3.06011100  | 1.52236900  |
| H                                                                                         | 5.95568100  | 2.94257400  | -0.45343300 |
| C                                                                                         | 1.77022300  | -1.96033800 | -1.12378400 |
| C                                                                                         | 2.19020500  | -3.23232900 | -0.73433000 |
| C                                                                                         | 1.47380200  | -1.71849800 | -2.47101000 |
| C                                                                                         | 2.31494600  | -4.24706800 | -1.68067400 |
| H                                                                                         | 2.40720500  | -3.44341700 | 0.31074900  |
| C                                                                                         | 1.61304800  | -2.72754700 | -3.41561300 |
| H                                                                                         | 1.11481800  | -0.73430300 | -2.77654900 |
| C                                                                                         | 2.02973600  | -3.99696400 | -3.01903300 |
| H                                                                                         | 2.63520800  | -5.23773100 | -1.36705200 |
| H                                                                                         | 1.38328400  | -2.52750700 | -4.45932100 |
| H                                                                                         | 2.12834700  | -4.79123300 | -3.75498700 |
| C                                                                                         | 1.73361100  | -1.26082700 | 1.72909100  |
| C                                                                                         | 2.99258300  | -1.71633900 | 2.14289800  |
| C                                                                                         | 0.66591800  | -1.29570000 | 2.62929900  |
| C                                                                                         | 3.16907700  | -2.22218300 | 3.42479200  |
| H                                                                                         | 3.83930300  | -1.66991800 | 1.45888700  |
| C                                                                                         | 0.84667500  | -1.79471600 | 3.91680700  |
| H                                                                                         | -0.31385300 | -0.93780100 | 2.31319600  |
| C                                                                                         | 2.09523800  | -2.26237200 | 4.31263200  |
| H                                                                                         | 4.14780600  | -2.57980000 | 3.73500800  |
| H                                                                                         | 0.00944200  | -1.81588100 | 4.60996800  |
| H                                                                                         | 2.23603700  | -2.65469000 | 5.31692600  |
| C                                                                                         | -1.80251500 | 3.51053300  | -1.90480300 |
| H                                                                                         | -7.28024100 | -0.46234900 | 1.02400600  |
| H                                                                                         | -1.35903500 | 4.37612400  | -1.40120800 |
| H                                                                                         | -1.22799100 | 3.31858300  | -2.81658600 |
| H                                                                                         | -2.83493500 | 3.74556100  | -2.19009900 |
| <b>INT2 complex of prop-1-yn-1-ylbenzene</b>                                              |             |             |             |
| Energy = -1134673.309298 kcal/mol                                                         |             |             |             |
| Electronic Energy + Thermal Free Energy Correction (353.150 K) = -1134403.727039 kcal/mol |             |             |             |
| Symmetry c1                                                                               |             |             |             |
| Pd                                                                                        | 0.72515000  | 0.35091900  | 0.07106700  |
| P                                                                                         | -1.61451000 | -0.39468300 | -0.11509600 |
| I                                                                                         | 1.57296200  | -2.11344100 | 0.60673200  |
| C                                                                                         | 0.89747700  | 2.69440000  | 0.40872300  |
| C                                                                                         | 0.47317400  | 2.52680100  | 1.75025600  |
| C                                                                                         | 0.01617700  | 3.33755300  | -0.50874400 |

|   |             |             |             |
|---|-------------|-------------|-------------|
| C | -0.76928000 | 2.96723600  | 2.18213200  |
| H | 1.17674400  | 2.07744200  | 2.44943500  |
| C | -1.22151200 | 3.80692900  | -0.04519500 |
| C | -1.60265300 | 3.62476400  | 1.27372200  |
| H | -1.07127100 | 2.83371800  | 3.21762000  |
| H | -1.88427100 | 4.31836000  | -0.74052100 |
| H | -2.57020500 | 3.99965900  | 1.60064900  |
| N | 0.40697100  | 3.55526500  | -1.80807500 |
| H | 1.11755100  | 2.93634200  | -2.17629100 |
| H | -0.32835100 | 3.76293100  | -2.46997900 |
| C | 2.61636900  | 1.12377900  | -0.02478600 |
| C | 2.33689100  | 2.42486500  | 0.05521100  |
| C | 3.88840200  | 0.45550800  | -0.26215900 |
| C | 4.14381000  | -0.21131400 | -1.46950300 |
| C | 4.88551200  | 0.47102800  | 0.72261800  |
| C | 5.36386100  | -0.83775600 | -1.68662900 |
| H | 3.36548400  | -0.24036300 | -2.23147700 |
| C | 6.10463300  | -0.16355300 | 0.50556300  |
| H | 4.68964600  | 0.98427900  | 1.66311800  |
| C | 6.34763800  | -0.82031400 | -0.69808600 |
| H | 5.54950100  | -1.34539800 | -2.63063900 |
| H | 6.86857400  | -0.14317600 | 1.27961600  |
| C | -2.93236000 | 0.84038000  | -0.44828900 |
| C | -3.97067300 | 1.13014900  | 0.43651100  |
| C | -2.86283200 | 1.52528000  | -1.66789700 |
| C | -4.92626800 | 2.09016800  | 0.10631000  |
| H | -4.04274700 | 0.60303600  | 1.38619200  |
| C | -3.82389100 | 2.47038000  | -2.00204600 |
| H | -2.05069700 | 1.31251300  | -2.36534100 |
| C | -4.85654700 | 2.75918600  | -1.11062500 |
| H | -5.73252300 | 2.30697100  | 0.80326200  |
| H | -3.76354200 | 2.98916900  | -2.95625000 |
| H | -5.60679100 | 3.50298200  | -1.36791800 |
| C | -2.15437400 | -1.26096800 | 1.40302700  |
| C | -2.55726800 | -2.59744100 | 1.42021000  |
| C | -2.04089300 | -0.56595600 | 2.61545600  |
| C | -2.85844000 | -3.22515400 | 2.62678900  |
| H | -2.62599000 | -3.15883000 | 0.49081600  |
| C | -2.35542800 | -1.19099600 | 3.81614900  |
| H | -1.70220000 | 0.47258800  | 2.61773400  |
| C | -2.76275700 | -2.52383600 | 3.82387900  |
| H | -3.16765700 | -4.26764100 | 2.62776900  |
| H | -2.27310200 | -0.63981700 | 4.74990400  |
| H | -2.99864100 | -3.01556400 | 4.76458000  |
| C | -1.91193900 | -1.55404900 | -1.50522600 |
| C | -3.19779500 | -2.03896100 | -1.77935700 |
| C | -0.85876000 | -1.89967700 | -2.35458700 |
| C | -3.41612700 | -2.87694200 | -2.86603300 |
| H | -4.03378300 | -1.75537600 | -1.14009900 |
| C | -1.08036600 | -2.73177500 | -3.44994400 |
| H | 0.14009000  | -1.51384200 | -2.15222900 |
| C | -2.35588000 | -3.22498600 | -3.70170100 |
| H | -4.41609300 | -3.25417400 | -3.06605200 |
| H | -0.25357700 | -2.99256300 | -4.10619900 |
| H | -2.52909500 | -3.87652900 | -4.55487900 |
| C | 3.27012400  | 3.58298800  | -0.12770700 |
| H | 7.30055300  | -1.31633000 | -0.86699200 |
| H | 2.89969100  | 4.27880200  | -0.89098400 |
| H | 3.34842900  | 4.15220800  | 0.80888000  |
| H | 4.27106100  | 3.24572200  | -0.41488600 |

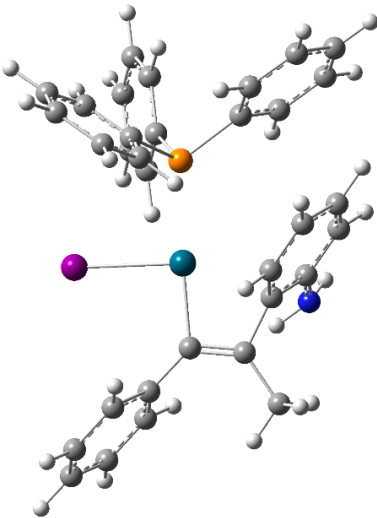

**ADS complex of hex-1-yn-1-ylbenzene**

Energy = -1208604.808862 kcal/mol

Electronic Energy + Thermal Free Energy Correction (353.150 K) = -1208287.331979 kcal/mol

Symmetry c1

|    |             |             |             |
|----|-------------|-------------|-------------|
| Pd | 0.56691600  | -0.00448400 | -0.11455700 |
| P  | -1.72191400 | -0.41181600 | -0.03267600 |
| I  | 1.22688200  | -2.13050400 | 1.61400500  |
| C  | 0.14284200  | 1.51719800  | -1.40438400 |
| C  | -0.13722900 | 2.78170500  | -0.89992600 |
| C  | 0.19906300  | 1.30832100  | -2.79149600 |
| C  | -0.34616000 | 3.86771100  | -1.75344000 |
| H  | -0.19787100 | 2.93465100  | 0.17970500  |
| C  | 0.00229100  | 2.40720800  | -3.64154300 |
| C  | -0.26815500 | 3.67010800  | -3.12862900 |
| H  | -0.56246600 | 4.85109500  | -1.34148700 |
| H  | 0.05143800  | 2.25175100  | -4.71985000 |
| H  | -0.42113200 | 4.50270400  | -3.81230800 |
| N  | 0.35675300  | 0.03254600  | -3.33684200 |
| H  | 0.81706200  | -0.63264600 | -2.72720500 |
| H  | 0.74693800  | 0.01640300  | -4.27065600 |
| C  | 2.66448300  | 1.11158600  | 0.28376100  |
| C  | 2.88414400  | 0.23506400  | -0.54924100 |
| C  | 2.44890100  | 2.18965500  | 1.20004600  |
| C  | 2.76644100  | 3.50032300  | 0.81598100  |
| C  | 1.88245000  | 1.95433600  | 2.46271100  |
| C  | 2.50984100  | 4.55763800  | 1.67886000  |
| H  | 3.19898700  | 3.67626200  | -0.16638900 |
| C  | 1.62115900  | 3.01904900  | 3.31456000  |
| H  | 1.63413300  | 0.93375800  | 2.75198400  |
| C  | 1.93183200  | 4.32056200  | 2.92428700  |
| H  | 2.75454700  | 5.57252400  | 1.37596600  |
| H  | 1.17261400  | 2.83273000  | 4.28750900  |
| C  | -2.87484800 | 0.79981300  | -0.76999300 |
| C  | -3.64409900 | 1.66723000  | 0.00701100  |
| C  | -2.93937700 | 0.88301700  | -2.16606800 |
| C  | -4.46242100 | 2.61406600  | -0.60568600 |
| H  | -3.61111800 | 1.60788800  | 1.09260700  |
| C  | -3.75764800 | 1.82659200  | -2.77151100 |
| H  | -2.33689700 | 0.21387700  | -2.78025600 |
| C  | -4.51800100 | 2.69733100  | -1.99202300 |
| H  | -5.06049700 | 3.28384700  | 0.00751000  |
| H  | -3.79477000 | 1.88954300  | -3.85653300 |
| H  | -5.15546400 | 3.43845000  | -2.46816000 |
| C  | -2.17951700 | -0.47429500 | 1.73299400  |
| C  | -2.90978400 | -1.52180600 | 2.29434500  |
| C  | -1.71426800 | 0.56078500  | 2.55401600  |
| C  | -3.16640600 | -1.53566800 | 3.66372800  |
| H  | -3.26627200 | -2.34016000 | 1.67195900  |
| C  | -1.98017400 | 0.54876000  | 3.91671100  |
| H  | -1.12600500 | 1.37334000  | 2.12368300  |
| C  | -2.70237100 | -0.50506300 | 4.47471600  |
| H  | -3.72832900 | -2.35957200 | 4.09664100  |
| H  | -1.61744600 | 1.35748500  | 4.54652000  |
| H  | -2.90189400 | -0.52181000 | 5.54327900  |
| C  | -2.23483000 | -1.98408200 | -0.79889500 |
| C  | -1.28072800 | -2.89311200 | -1.26137000 |
| C  | -3.59707300 | -2.27678700 | -0.94696800 |
| C  | -1.68227300 | -4.08790900 | -1.85230800 |
| H  | -0.22083000 | -2.66340600 | -1.15062500 |

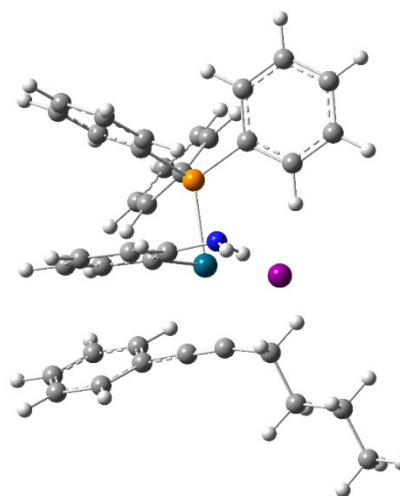

|   |             |             |             |
|---|-------------|-------------|-------------|
| C | -3.99386100 | -3.47421200 | -1.52945300 |
| H | -4.34740100 | -1.56275900 | -0.60887000 |
| C | -3.03641800 | -4.37954800 | -1.98272800 |
| H | -0.93471500 | -4.78950400 | -2.21378100 |
| H | -5.05219000 | -3.69818400 | -1.63649400 |
| H | -3.34920000 | -5.31292100 | -2.44444100 |
| C | 3.44346500  | -0.74974300 | -1.47548200 |
| H | 1.72350100  | 5.15209500  | 3.59293600  |
| H | 2.86572900  | -1.68455800 | -1.40995500 |
| H | 3.32539500  | -0.38203300 | -2.50637300 |
| C | 4.91763200  | -1.03908100 | -1.18592700 |
| H | 5.48639700  | -0.09822000 | -1.21469100 |
| H | 5.01051900  | -1.42708000 | -0.16021300 |
| C | 5.50605500  | -2.03310000 | -2.17463900 |
| H | 4.91599200  | -2.96143400 | -2.14847400 |
| H | 5.39909100  | -1.63374900 | -3.19431900 |
| C | 6.96612200  | -2.33583700 | -1.88416500 |
| H | 7.38471400  | -3.04724200 | -2.60378000 |
| H | 7.57280600  | -1.42258100 | -1.92550100 |
| H | 7.08669700  | -2.76502200 | -0.88166600 |

**TS1 complex of hex-1-yn-1-ylbenzene**

Energy = -1208589.594907 kcal/mol

Electronic Energy + Thermal Free Energy Correction (353.150 K) = -1208270.323975 kcal/mol

Imaginary frequency = -302.86 cm<sup>-1</sup>

Symmetry c1

|    |             |             |             |
|----|-------------|-------------|-------------|
| Pd | -0.37219700 | -0.48747000 | -0.39842100 |
| P  | 1.85559900  | 0.24374900  | 0.21039000  |
| I  | 0.35311500  | -3.11931900 | -0.06412400 |
| C  | -0.95075400 | 1.45867000  | -0.86811800 |
| C  | -1.00844600 | 1.76465200  | -2.23029200 |
| C  | -0.82959000 | 2.48805200  | 0.08718700  |
| C  | -0.90433500 | 3.08098100  | -2.67072800 |
| H  | -1.15421000 | 0.95833300  | -2.94828400 |
| C  | -0.74189300 | 3.81081800  | -0.36879700 |
| C  | -0.77047600 | 4.09899900  | -1.72562700 |
| H  | -0.94371700 | 3.30978400  | -3.73274500 |
| H  | -0.63912300 | 4.61185400  | 0.36283400  |
| H  | -0.69949700 | 5.13548200  | -2.04911800 |
| N  | -0.74746400 | 2.19748600  | 1.43312800  |
| H  | -1.14759900 | 1.31445800  | 1.72371700  |
| H  | -0.94805900 | 2.95826600  | 2.06797000  |
| C  | -2.59832800 | 0.15541900  | -0.52711100 |
| C  | -2.34599300 | -0.99890000 | -0.99244500 |
| C  | -3.53850400 | 1.02774200  | 0.15726800  |
| C  | -3.96612000 | 2.24062400  | -0.39420500 |
| C  | -4.06825000 | 0.60102100  | 1.38331500  |
| C  | -4.91823100 | 3.00549200  | 0.26675300  |
| H  | -3.54665100 | 2.57386600  | -1.34148100 |
| C  | -5.01687700 | 1.37424200  | 2.04288400  |
| H  | -3.72674100 | -0.34386400 | 1.80573700  |
| C  | -5.44228200 | 2.57697500  | 1.48560300  |
| H  | -5.25409700 | 3.94295600  | -0.16958400 |
| H  | -5.42149200 | 1.03655700  | 2.99381500  |
| C  | 2.32027100  | 2.00970100  | -0.01898700 |
| C  | 2.54198900  | 2.51224500  | -1.30441600 |
| C  | 2.37855800  | 2.88911900  | 1.06779800  |
| C  | 2.82203900  | 3.85996700  | -1.50002300 |
| H  | 2.50924500  | 1.85077300  | -2.16789900 |
| C  | 2.66277400  | 4.23611800  | 0.87105700  |

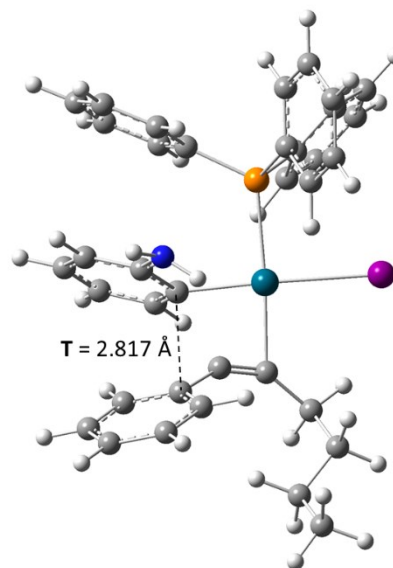

|                                                                                           |             |             |             |
|-------------------------------------------------------------------------------------------|-------------|-------------|-------------|
| H                                                                                         | 2.19219800  | 2.52459700  | 2.07502900  |
| C                                                                                         | 2.88444700  | 4.72581000  | -0.41288000 |
| H                                                                                         | 2.99457900  | 4.23246800  | -2.50720700 |
| H                                                                                         | 2.71106700  | 4.90492100  | 1.72744300  |
| H                                                                                         | 3.10578200  | 5.77966000  | -0.56530700 |
| C                                                                                         | 3.00381500  | -0.64574200 | -0.91517900 |
| C                                                                                         | 4.15281500  | -1.31341100 | -0.48729800 |
| C                                                                                         | 2.64722300  | -0.71256000 | -2.26886600 |
| C                                                                                         | 4.93558900  | -2.02146800 | -1.39670000 |
| H                                                                                         | 4.43558800  | -1.30712500 | 0.56267900  |
| C                                                                                         | 3.43845300  | -1.40397900 | -3.17825800 |
| H                                                                                         | 1.72267200  | -0.24385300 | -2.60900700 |
| C                                                                                         | 4.58497600  | -2.06399900 | -2.74206700 |
| H                                                                                         | 5.82300800  | -2.54410700 | -1.04752000 |
| H                                                                                         | 3.14972200  | -1.44126400 | -4.22588400 |
| H                                                                                         | 5.19824000  | -2.61771200 | -3.44881100 |
| C                                                                                         | 2.39981800  | -0.12623000 | 1.91517100  |
| C                                                                                         | 3.67073600  | 0.22774300  | 2.38921800  |
| C                                                                                         | 1.50059600  | -0.75112700 | 2.78287300  |
| C                                                                                         | 4.03750000  | -0.06430200 | 3.69780500  |
| H                                                                                         | 4.37282100  | 0.74618100  | 1.73763700  |
| C                                                                                         | 1.86664900  | -1.03752000 | 4.09523000  |
| H                                                                                         | 0.50863500  | -1.01767400 | 2.41974000  |
| C                                                                                         | 3.13678800  | -0.69943100 | 4.55054700  |
| H                                                                                         | 5.02693700  | 0.21055100  | 4.05484000  |
| H                                                                                         | 1.15726000  | -1.52216900 | 4.76138400  |
| H                                                                                         | 3.42516800  | -0.92369800 | 5.57473200  |
| C                                                                                         | -2.87759200 | -2.26909300 | -1.53854100 |
| H                                                                                         | -6.18343400 | 3.18266100  | 2.00131000  |
| H                                                                                         | -2.05674000 | -2.94254400 | -1.80289700 |
| H                                                                                         | -3.41297500 | -2.03717900 | -2.47209700 |
| C                                                                                         | -3.83329700 | -2.95199700 | -0.55431400 |
| H                                                                                         | -3.95449400 | -4.00498500 | -0.84788800 |
| H                                                                                         | -3.36853800 | -2.96370900 | 0.44449700  |
| C                                                                                         | -5.19809200 | -2.28211200 | -0.48581000 |
| H                                                                                         | -5.70836800 | -2.41561900 | -1.45146800 |
| H                                                                                         | -5.06889000 | -1.19697400 | -0.36029000 |
| C                                                                                         | -6.05491000 | -2.82488900 | 0.64453500  |
| H                                                                                         | -5.58827000 | -2.62061200 | 1.61747000  |
| H                                                                                         | -7.05341100 | -2.37485200 | 0.65349500  |
| H                                                                                         | -6.17876600 | -3.91231700 | 0.56182700  |
| <b>INT1 complex of hex-1-yn-1-ylbenzene</b>                                               |             |             |             |
| Energy = -1208624.419774 kcal/mol                                                         |             |             |             |
| Electronic Energy + Thermal Free Energy Correction (353.150 K) = -1208303.971008 kcal/mol |             |             |             |
| Symmetry c1                                                                               |             |             |             |
| Pd                                                                                        | -0.40631700 | -0.24629300 | -0.31394700 |
| P                                                                                         | 1.98208800  | 0.26421000  | 0.15892800  |
| I                                                                                         | 0.23827000  | -2.77869600 | -0.84840900 |
| C                                                                                         | -1.69282800 | 1.68584900  | -0.39527400 |
| C                                                                                         | -1.05681300 | 1.97899500  | -1.62974200 |
| C                                                                                         | -1.40800300 | 2.51614000  | 0.73363000  |
| C                                                                                         | -0.15670400 | 3.02907800  | -1.75575500 |
| H                                                                                         | -1.34266000 | 1.38597800  | -2.49708900 |
| C                                                                                         | -0.53006700 | 3.59551800  | 0.57337800  |
| C                                                                                         | 0.08603100  | 3.83846300  | -0.64503400 |
| H                                                                                         | 0.32376000  | 3.23267400  | -2.70916900 |
| H                                                                                         | -0.32149000 | 4.23642200  | 1.42820000  |
| H                                                                                         | 0.78227000  | 4.67152500  | -0.72240700 |
| N                                                                                         | -1.97316700 | 2.24471600  | 1.94914900  |

|   |             |             |             |
|---|-------------|-------------|-------------|
| H | -2.78502400 | 1.64347700  | 1.97351800  |
| H | -1.96099600 | 2.97360400  | 2.64730200  |
| C | -2.84684300 | 0.71612600  | -0.36174800 |
| C | -2.42242600 | -0.54713100 | -0.49706000 |
| C | -4.21802100 | 1.25634500  | -0.24323700 |
| C | -4.49279300 | 2.54413800  | -0.72685700 |
| C | -5.26114900 | 0.53724100  | 0.35798600  |
| C | -5.77023500 | 3.08280300  | -0.63803600 |
| H | -3.69201900 | 3.12375600  | -1.18605600 |
| C | -6.53913400 | 1.07766600  | 0.44678200  |
| H | -5.06533100 | -0.44512100 | 0.78229500  |
| C | -6.80068400 | 2.35046400  | -0.05313100 |
| H | -5.96216100 | 4.08040000  | -1.02672400 |
| H | -7.33239700 | 0.50487400  | 0.92175400  |
| C | 2.57407400  | 1.95621900  | 0.57024200  |
| C | 3.38277500  | 2.71852000  | -0.27352000 |
| C | 2.17017000  | 2.49587500  | 1.79714900  |
| C | 3.78495200  | 3.99794200  | 0.10607100  |
| H | 3.70996100  | 2.31402500  | -1.22964000 |
| C | 2.58511500  | 3.76409000  | 2.18164400  |
| H | 1.51564500  | 1.92059000  | 2.45440600  |
| C | 3.39167500  | 4.52100200  | 1.33335300  |
| H | 4.41691600  | 4.58219000  | -0.55883300 |
| H | 2.26895500  | 4.16816900  | 3.14077700  |
| H | 3.71329800  | 5.51617000  | 1.63110000  |
| C | 2.98351000  | -0.21366300 | -1.29770900 |
| C | 4.03084700  | -1.13495500 | -1.25744600 |
| C | 2.59357000  | 0.32173100  | -2.53272200 |
| C | 4.68509800  | -1.50611600 | -2.43009800 |
| H | 4.33122900  | -1.58153900 | -0.31200000 |
| C | 3.25654200  | -0.03895300 | -3.69967500 |
| H | 1.75659400  | 1.02095800  | -2.57703100 |
| C | 4.30328700  | -0.95767200 | -3.65017100 |
| H | 5.49618700  | -2.22913600 | -2.38676500 |
| H | 2.94812100  | 0.38848700  | -4.65078300 |
| H | 4.81634900  | -1.24883600 | -4.56357400 |
| C | 2.65843900  | -0.65718900 | 1.59298300  |
| C | 3.99260300  | -0.50733600 | 1.99418400  |
| C | 1.80541400  | -1.46016500 | 2.35392400  |
| C | 4.46951000  | -1.17865500 | 3.11341200  |
| H | 4.65969900  | 0.14427100  | 1.43018500  |
| C | 2.28088000  | -2.12288500 | 3.48311900  |
| H | 0.76355200  | -1.56783500 | 2.05248500  |
| C | 3.61353700  | -1.98881900 | 3.85798400  |
| H | 5.50888700  | -1.06356600 | 3.41119600  |
| H | 1.60769800  | -2.74264000 | 4.07046100  |
| H | 3.98643100  | -2.50859700 | 4.73735500  |
| C | -3.18221100 | -1.82083500 | -0.58779000 |
| H | -7.79945300 | 2.77382100  | 0.02166600  |
| H | -2.72751200 | -2.47161200 | -1.34878800 |
| H | -4.20877300 | -1.60235100 | -0.92993000 |
| C | -3.24226700 | -2.59160000 | 0.73110700  |
| H | -2.22084100 | -2.71724400 | 1.12248600  |
| H | -3.78386300 | -1.99930100 | 1.48688800  |
| C | -3.89673500 | -3.95466900 | 0.57472100  |
| H | -4.90465600 | -3.83003900 | 0.14969400  |
| H | -3.32520600 | -4.53736500 | -0.16491600 |
| C | -3.97409100 | -4.71655300 | 1.88664400  |
| H | -4.56204000 | -4.16296900 | 2.62977500  |
| H | -4.43732200 | -5.70131500 | 1.76214600  |

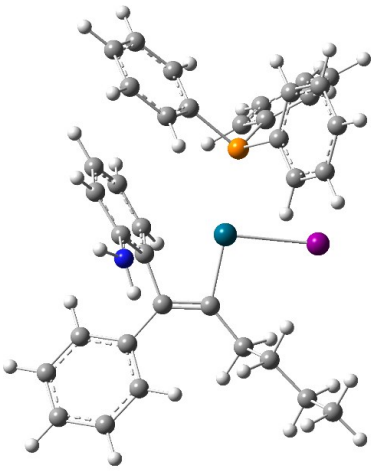

|                                                                                           |             |             |             |
|-------------------------------------------------------------------------------------------|-------------|-------------|-------------|
| H                                                                                         | -2.97283900 | -4.86974800 | 2.30948400  |
| <b>TS2 complex of hex-1-yn-1-ylbenzene</b>                                                |             |             |             |
| Energy = -1208589.194556 kcal/mol                                                         |             |             |             |
| Electronic Energy + Thermal Free Energy Correction (353.150 K) = -1208272.148771 kcal/mol |             |             |             |
| Imaginary frequency = -294.86 cm <sup>-1</sup>                                            |             |             |             |
| Symmetry c1                                                                               |             |             |             |
| Pd                                                                                        | 0.42053500  | -0.09616900 | -0.02954500 |
| P                                                                                         | -1.96572800 | -0.00947400 | 0.15835700  |
| I                                                                                         | 0.36169900  | -2.81233100 | 0.37657200  |
| C                                                                                         | 0.54774300  | 1.95269500  | -0.45001400 |
| C                                                                                         | 0.15731100  | 2.91109600  | 0.49319900  |
| C                                                                                         | 0.69231600  | 2.32613400  | -1.80365900 |
| C                                                                                         | -0.03259700 | 4.23887100  | 0.14003900  |
| H                                                                                         | 0.03404900  | 2.60716000  | 1.53375600  |
| C                                                                                         | 0.50709700  | 3.67691300  | -2.14775300 |
| C                                                                                         | 0.15615200  | 4.61639700  | -1.19109400 |
| H                                                                                         | -0.33207200 | 4.96898600  | 0.88800200  |
| H                                                                                         | 0.63305800  | 3.97380500  | -3.18879800 |
| H                                                                                         | 0.01620800  | 5.65327000  | -1.48936800 |
| N                                                                                         | 1.06117100  | 1.40995700  | -2.77381600 |
| H                                                                                         | 0.76861500  | 0.45628700  | -2.60476500 |
| H                                                                                         | 0.90673100  | 1.70165900  | -3.72956300 |
| C                                                                                         | 2.56256100  | -0.07110200 | -0.24897600 |
| C                                                                                         | 2.39940900  | 1.12339900  | 0.13173100  |
| C                                                                                         | 3.41875100  | -1.18193700 | -0.59048600 |
| C                                                                                         | 3.58457800  | -1.56037000 | -1.92894300 |
| C                                                                                         | 4.09976000  | -1.88451800 | 0.41284400  |
| C                                                                                         | 4.42082300  | -2.62058800 | -2.25582200 |
| H                                                                                         | 3.04960600  | -1.01494100 | -2.70427000 |
| C                                                                                         | 4.93274900  | -2.94484000 | 0.07832300  |
| H                                                                                         | 3.95789600  | -1.59731000 | 1.45291400  |
| C                                                                                         | 5.09412200  | -3.31750900 | -1.25430200 |
| H                                                                                         | 4.54614500  | -2.90604600 | -3.29757100 |
| H                                                                                         | 5.45787600  | -3.48407100 | 0.86317700  |
| C                                                                                         | -2.75655300 | 1.64152600  | 0.20067600  |
| C                                                                                         | -3.26052900 | 2.20993400  | 1.37156900  |
| C                                                                                         | -2.80219900 | 2.37380500  | -0.99131400 |
| C                                                                                         | -3.80615600 | 3.49176900  | 1.34843000  |
| H                                                                                         | -3.23802300 | 1.65175100  | 2.30566200  |
| C                                                                                         | -3.34789000 | 3.64968100  | -1.01168700 |
| H                                                                                         | -2.40048100 | 1.94334100  | -1.90896800 |
| C                                                                                         | -3.85175500 | 4.21201700  | 0.16004100  |
| H                                                                                         | -4.20204100 | 3.92316300  | 2.26493400  |
| H                                                                                         | -3.37452700 | 4.21027000  | -1.94341900 |
| H                                                                                         | -4.27938300 | 5.21171500  | 0.14424700  |
| C                                                                                         | -2.50984400 | -0.81991300 | 1.70288100  |
| C                                                                                         | -3.51864500 | -1.78238900 | 1.76062600  |
| C                                                                                         | -1.81620600 | -0.48317900 | 2.87184800  |
| C                                                                                         | -3.83216400 | -2.39411400 | 2.97225200  |
| H                                                                                         | -4.05277200 | -2.07334900 | 0.85855400  |
| C                                                                                         | -2.14098300 | -1.08284600 | 4.08205300  |
| H                                                                                         | -1.00331000 | 0.24312800  | 2.82560900  |
| C                                                                                         | -3.14910800 | -2.04382600 | 4.13246800  |
| H                                                                                         | -4.61395500 | -3.14900300 | 3.00678200  |
| H                                                                                         | -1.59837400 | -0.81045200 | 4.98397000  |
| H                                                                                         | -3.39657200 | -2.52375300 | 5.07619900  |
| C                                                                                         | -2.86876800 | -0.80392300 | -1.22006400 |
| C                                                                                         | -4.26287400 | -0.69434500 | -1.31321900 |
| C                                                                                         | -2.16832500 | -1.47400200 | -2.22591400 |

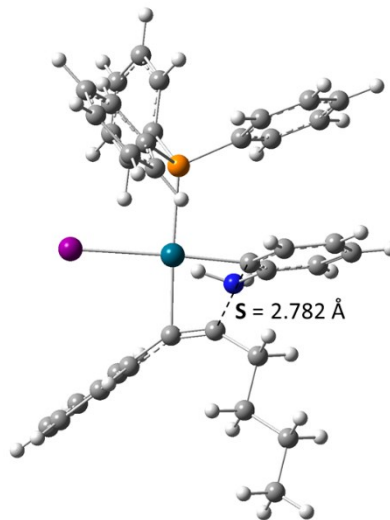



|                                                                                           |             |             |             |
|-------------------------------------------------------------------------------------------|-------------|-------------|-------------|
| C                                                                                         | -4.94216100 | -1.26879400 | -2.38034000 |
| H                                                                                         | -4.81760000 | -0.14870800 | -0.55053800 |
| C                                                                                         | -2.85010700 | -2.03925900 | -3.30102100 |
| H                                                                                         | -1.08402900 | -1.55983900 | -2.15923200 |
| C                                                                                         | -4.23555700 | -1.94094800 | -3.37589700 |
| H                                                                                         | -6.02430300 | -1.18409500 | -2.44089200 |
| H                                                                                         | -2.29567700 | -2.55510500 | -4.08109700 |
| H                                                                                         | -4.76751900 | -2.38398100 | -4.21436800 |
| C                                                                                         | 3.05651700  | 2.32316100  | 0.69421200  |
| H                                                                                         | 5.74353900  | -4.15041900 | -1.51242000 |
| H                                                                                         | 2.96400800  | 3.16179100  | -0.01214000 |
| H                                                                                         | 2.53523600  | 2.63945500  | 1.60873500  |
| C                                                                                         | 4.52301100  | 2.03362700  | 0.99988300  |
| H                                                                                         | 4.58943400  | 1.21082000  | 1.72785900  |
| H                                                                                         | 5.02638000  | 1.67824300  | 0.08767000  |
| C                                                                                         | 5.24178600  | 3.25995000  | 1.54264800  |
| H                                                                                         | 5.16518300  | 4.07756200  | 0.81052500  |
| H                                                                                         | 4.72225400  | 3.61227300  | 2.44631400  |
| C                                                                                         | 6.70110000  | 2.97866400  | 1.85791500  |
| H                                                                                         | 7.24009000  | 2.64829800  | 0.96110100  |
| H                                                                                         | 7.21191700  | 3.86626900  | 2.24593900  |
| H                                                                                         | 6.79529600  | 2.18414800  | 2.60875900  |
| <b>INT2 complex of hex-1-yn-1-ylbenzene</b>                                               |             |             |             |
| Energy = -1208623.924669 kcal/mol                                                         |             |             |             |
| Electronic Energy + Thermal Free Energy Correction (353.150 K) = -1208305.561115 kcal/mol |             |             |             |
| Symmetry c1                                                                               |             |             |             |
| Pd                                                                                        | 0.39776000  | -0.22592600 | 0.01826000  |
| P                                                                                         | -2.03669800 | 0.16400100  | -0.05710900 |
| I                                                                                         | 0.06631600  | -2.75936700 | 0.75585800  |
| C                                                                                         | 1.61745900  | 1.79667400  | 0.03370100  |
| C                                                                                         | 1.32761800  | 1.94669900  | 1.41338400  |
| C                                                                                         | 1.01566500  | 2.69986200  | -0.89049900 |
| C                                                                                         | 0.47663400  | 2.93892600  | 1.87774400  |
| H                                                                                         | 1.84286500  | 1.28536100  | 2.10850300  |
| C                                                                                         | 0.18445400  | 3.71649000  | -0.39979800 |
| C                                                                                         | -0.07589200 | 3.83165300  | 0.95619900  |
| H                                                                                         | 0.27246400  | 3.03747900  | 2.94047000  |
| H                                                                                         | -0.26876200 | 4.41157600  | -1.10430100 |
| H                                                                                         | -0.72663300 | 4.63251800  | 1.30101900  |
| N                                                                                         | 1.29757600  | 2.60849100  | -2.23215500 |
| H                                                                                         | 1.60828300  | 1.70659000  | -2.56915700 |
| H                                                                                         | 0.65769900  | 3.07601800  | -2.85983600 |
| C                                                                                         | 2.41837900  | -0.41362200 | -0.25074300 |
| C                                                                                         | 2.73832300  | 0.87582200  | -0.37490400 |
| C                                                                                         | 3.24908300  | -1.59662500 | -0.42578900 |
| C                                                                                         | 3.02679100  | -2.50078600 | -1.47493400 |
| C                                                                                         | 4.30645700  | -1.84331000 | 0.46143400  |
| C                                                                                         | 3.84521300  | -3.61043600 | -1.63692500 |
| H                                                                                         | 2.19681300  | -2.32335000 | -2.15792500 |
| C                                                                                         | 5.11929100  | -2.96121600 | 0.30289100  |
| H                                                                                         | 4.48058800  | -1.14680300 | 1.28052400  |
| C                                                                                         | 4.89188300  | -3.84812200 | -0.74561900 |
| H                                                                                         | 3.66486700  | -4.29877800 | -2.45961300 |
| H                                                                                         | 5.93419800  | -3.13846400 | 1.00123300  |
| C                                                                                         | -2.68501000 | 1.84203600  | -0.42598000 |
| C                                                                                         | -3.35572700 | 2.63559800  | 0.50476700  |
| C                                                                                         | -2.45285900 | 2.34630200  | -1.71157600 |
| C                                                                                         | -3.78775500 | 3.91366100  | 0.15352400  |
| H                                                                                         | -3.54939700 | 2.25869200  | 1.50751300  |

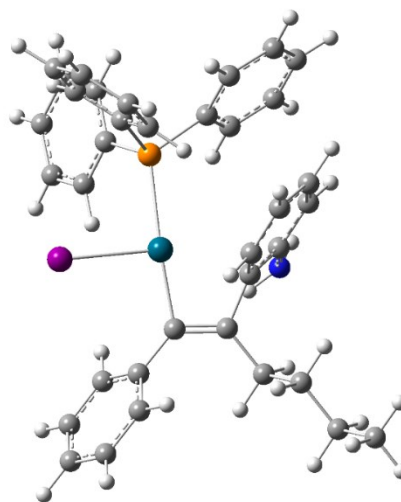

|                                                                                           |             |             |             |
|-------------------------------------------------------------------------------------------|-------------|-------------|-------------|
| C                                                                                         | -2.89374800 | 3.61524400  | -2.06337400 |
| H                                                                                         | -1.92902800 | 1.73353100  | -2.44714700 |
| C                                                                                         | -3.55983800 | 4.40529900  | -1.12694300 |
| H                                                                                         | -4.31220600 | 4.52284600  | 0.88612600  |
| H                                                                                         | -2.71420200 | 3.99161200  | -3.06806600 |
| H                                                                                         | -3.90296200 | 5.40064200  | -1.39874300 |
| C                                                                                         | -2.83710600 | -0.30292400 | 1.51955700  |
| C                                                                                         | -3.86148900 | -1.24527900 | 1.62684900  |
| C                                                                                         | -2.30406100 | 0.26265800  | 2.68550200  |
| C                                                                                         | -4.35242400 | -1.60673400 | 2.87942700  |
| H                                                                                         | -4.27319000 | -1.71226700 | 0.73450100  |
| C                                                                                         | -2.80618900 | -0.08791400 | 3.93285300  |
| H                                                                                         | -1.48181200 | 0.97675700  | 2.60894200  |
| C                                                                                         | -3.83084200 | -1.02757200 | 4.03144900  |
| H                                                                                         | -5.14591400 | -2.34666600 | 2.95263200  |
| H                                                                                         | -2.38935000 | 0.36272800  | 4.83036900  |
| H                                                                                         | -4.21655000 | -1.31251200 | 5.00729700  |
| C                                                                                         | -2.86721000 | -0.79827000 | -1.37829700 |
| C                                                                                         | -4.24461900 | -0.68080200 | -1.60775900 |
| C                                                                                         | -2.10250500 | -1.60071800 | -2.22780700 |
| C                                                                                         | -4.84632000 | -1.38151900 | -2.64603600 |
| H                                                                                         | -4.84823800 | -0.03131600 | -0.97391100 |
| C                                                                                         | -2.70445400 | -2.29406000 | -3.27571600 |
| H                                                                                         | -1.02793900 | -1.68071700 | -2.06340600 |
| C                                                                                         | -4.07610500 | -2.19075100 | -3.47982600 |
| H                                                                                         | -5.91715900 | -1.29013000 | -2.81078900 |
| H                                                                                         | -2.09828200 | -2.91371900 | -3.93211400 |
| H                                                                                         | -4.54807800 | -2.73348900 | -4.29540400 |
| C                                                                                         | 4.05692300  | 1.46499900  | -0.79603900 |
| H                                                                                         | 5.52644400  | -4.72242400 | -0.86934600 |
| H                                                                                         | 3.91595000  | 2.10593800  | -1.68098300 |
| H                                                                                         | 4.73316700  | 0.65124300  | -1.09366100 |
| C                                                                                         | 4.69687600  | 2.29898100  | 0.31102200  |
| H                                                                                         | 4.01234000  | 3.11165500  | 0.60407400  |
| H                                                                                         | 4.82864200  | 1.67485700  | 1.21017300  |
| C                                                                                         | 6.03570200  | 2.89156900  | -0.10261700 |
| H                                                                                         | 6.71289600  | 2.07765000  | -0.40284900 |
| H                                                                                         | 5.89237400  | 3.51104900  | -1.00088700 |
| C                                                                                         | 6.67365200  | 3.71623900  | 1.00227300  |
| H                                                                                         | 7.63683400  | 4.13701800  | 0.69405300  |
| H                                                                                         | 6.02397600  | 4.55041100  | 1.29617000  |
| H                                                                                         | 6.84758100  | 3.10577900  | 1.89744400  |
| <b>ADS complex of (cyclopentylethynyl)benzene</b>                                         |             |             |             |
| Energy = -1232498.711274 kcal/mol                                                         |             |             |             |
| Electronic Energy + Thermal Free Energy Correction (353.150 K) = -1232174.393287 kcal/mol |             |             |             |
| Symmetry c1                                                                               |             |             |             |
| Pd                                                                                        | -0.60330100 | -0.13807200 | 0.01604800  |
| P                                                                                         | 1.72884400  | -0.17327000 | 0.02501900  |
| I                                                                                         | -0.77735000 | -1.39774600 | -2.49926400 |
| C                                                                                         | -0.48732900 | 0.72689800  | 1.85813000  |
| C                                                                                         | -0.42709500 | 2.11220300  | 1.94213300  |
| C                                                                                         | -0.51692600 | -0.05010800 | 3.02629000  |
| C                                                                                         | -0.41918100 | 2.75931200  | 3.17998000  |
| H                                                                                         | -0.39059500 | 2.70867800  | 1.02846300  |
| C                                                                                         | -0.52808000 | 0.60714100  | 4.26614100  |
| C                                                                                         | -0.47479100 | 1.99388300  | 4.34071200  |
| H                                                                                         | -0.37017300 | 3.84486800  | 3.22943400  |
| H                                                                                         | -0.55907900 | 0.00903100  | 5.17742600  |
| H                                                                                         | -0.47563300 | 2.47629300  | 5.31610700  |

|   |             |             |             |
|---|-------------|-------------|-------------|
| N | -0.44552300 | -1.44539500 | 2.97968300  |
| H | -0.78246100 | -1.85383100 | 2.11589900  |
| H | -0.82903300 | -1.91738900 | 3.78924000  |
| C | -2.76040400 | 0.87868200  | -0.24382500 |
| C | -2.97437700 | -0.18772300 | 0.32936000  |
| C | -2.61318400 | 2.19506100  | -0.78946400 |
| C | -2.96046800 | 3.29811300  | 0.00638400  |
| C | -2.11570700 | 2.40417400  | -2.08450800 |
| C | -2.80946800 | 4.58707800  | -0.48713200 |
| H | -3.34022000 | 3.12900500  | 1.01160700  |
| C | -1.96492700 | 3.69767200  | -2.56691900 |
| H | -1.84105000 | 1.54340700  | -2.69243000 |
| C | -2.30892900 | 4.78903500  | -1.77150400 |
| H | -3.07994400 | 5.43755100  | 0.13344300  |
| H | -1.57793900 | 3.85554900  | -3.57073100 |
| C | 2.62025300  | 0.76042700  | 1.32154600  |
| C | 3.24101900  | 1.98400600  | 1.06497900  |
| C | 2.63226700  | 0.24067900  | 2.62190500  |
| C | 3.86418500  | 2.68150400  | 2.09769600  |
| H | 3.24474800  | 2.39840500  | 0.05912600  |
| C | 3.26066800  | 0.93637700  | 3.64561800  |
| H | 2.13388300  | -0.70516400 | 2.83776800  |
| C | 3.87456700  | 2.16119600  | 3.38649500  |
| H | 4.34671100  | 3.63322300  | 1.88826500  |
| H | 3.25943900  | 0.52703200  | 4.65323000  |
| H | 4.36240500  | 2.70648100  | 4.19093000  |
| C | 2.24895400  | 0.59860400  | -1.54658700 |
| C | 3.18314700  | 0.01349400  | -2.40186100 |
| C | 1.63050100  | 1.79839800  | -1.91965400 |
| C | 3.49334000  | 0.62134500  | -3.61613100 |
| H | 3.65980900  | -0.92731500 | -2.13431000 |
| C | 1.94789700  | 2.40623300  | -3.12705000 |
| H | 0.87733700  | 2.24691700  | -1.26908100 |
| C | 2.87834600  | 1.81469800  | -3.98013500 |
| H | 4.21628800  | 0.15531300  | -4.28107200 |
| H | 1.46145700  | 3.33738400  | -3.40744500 |
| H | 3.11983700  | 2.28416100  | -4.93058400 |
| C | 2.51634800  | -1.81673500 | 0.10453600  |
| C | 1.75145400  | -2.98206400 | 0.02372300  |
| C | 3.90460700  | -1.91214900 | 0.26972200  |
| C | 2.36666100  | -4.22909300 | 0.09698500  |
| H | 0.67168300  | -2.90821500 | -0.09927600 |
| C | 4.51621100  | -3.15802100 | 0.33255000  |
| H | 4.50744800  | -1.00851400 | 0.35244900  |
| C | 3.74692800  | -4.31672800 | 0.24809200  |
| H | 1.76408800  | -5.13204200 | 0.03976600  |
| H | 5.59415300  | -3.22528400 | 0.45536500  |
| H | 4.22595200  | -5.29107900 | 0.30671700  |
| H | -2.18745300 | 5.79923800  | -2.15467700 |
| C | -3.50622600 | -1.35693600 | 1.02300500  |
| C | -5.04214000 | -1.34630900 | 1.12382600  |
| C | -3.23161400 | -2.71694900 | 0.37200200  |
| H | -3.08429300 | -1.37112900 | 2.04316600  |
| C | -5.41222300 | -2.79954700 | 1.46967600  |
| H | -5.44939400 | -1.06434600 | 0.14361000  |
| H | -5.40560800 | -0.61377200 | 1.85157300  |
| C | -4.16028800 | -3.64667300 | 1.14951300  |
| H | -2.17444700 | -3.00839500 | 0.40881900  |
| H | -3.51323500 | -2.66335200 | -0.68957400 |
| H | -5.68846000 | -2.89634300 | 2.52533900  |

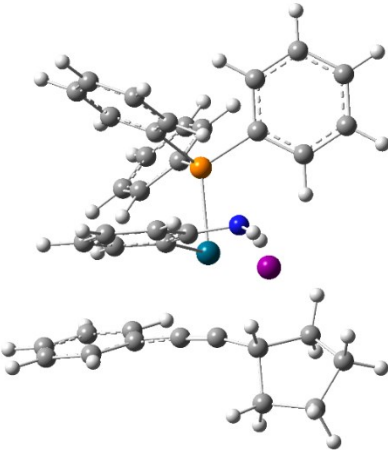

|   |             |             |            |
|---|-------------|-------------|------------|
| H | -6.28093500 | -3.12463600 | 0.88734900 |
| H | -3.66661400 | -3.95488800 | 2.08059900 |
| H | -4.39520700 | -4.56123600 | 0.59584800 |

**TS1 complex of (cyclopentylethynyl)benzene**

Energy = -1232483.738282 kcal/mol

Electronic Energy + Thermal Free Energy Correction (353.150 K) = -1232157.759279 kcal/mol

 Imaginary frequency = -272.78 cm<sup>-1</sup>

Symmetry c1

|    |             |             |             |
|----|-------------|-------------|-------------|
| Pd | -0.42187200 | -0.39151100 | -0.17360000 |
| P  | 1.92394100  | 0.15643900  | 0.09691700  |
| I  | 0.14493700  | -3.05481000 | 0.19579700  |
| C  | -0.82515300 | 1.57280800  | -0.74424100 |
| C  | -0.96125900 | 1.80048100  | -2.11393400 |
| C  | -0.57467700 | 2.64177100  | 0.13588100  |
| C  | -0.81052700 | 3.08214300  | -2.64093800 |
| H  | -1.20155700 | 0.96363500  | -2.76964100 |
| C  | -0.44249800 | 3.92845000  | -0.40387300 |
| C  | -0.55264600 | 4.14181500  | -1.77149400 |
| H  | -0.90984100 | 3.25084400  | -3.71036500 |
| H  | -0.23469200 | 4.76081400  | 0.26853000  |
| H  | -0.44242600 | 5.15138900  | -2.16200400 |
| N  | -0.41255500 | 2.41913700  | 1.48902600  |
| H  | -0.82642900 | 1.56969500  | 1.85239400  |
| H  | -0.53559400 | 3.21944900  | 2.09422300  |
| C  | -2.62723500 | 0.45796600  | -0.16534900 |
| C  | -2.48939100 | -0.77276900 | -0.43207700 |
| C  | -3.44712300 | 1.52811900  | 0.36613800  |
| C  | -3.75439200 | 2.67836300  | -0.37157700 |
| C  | -4.01356200 | 1.35024500  | 1.63638600  |
| C  | -4.62392200 | 3.62500000  | 0.15186100  |
| H  | -3.30200200 | 2.81902200  | -1.35150100 |
| C  | -4.87906200 | 2.30557700  | 2.15655000  |
| H  | -3.76297400 | 0.45652500  | 2.20598600  |
| C  | -5.18595300 | 3.44300200  | 1.41479800  |
| H  | -4.86594000 | 4.51234800  | -0.42795800 |
| H  | -5.31275900 | 2.16150800  | 3.14302200  |
| C  | 2.55604500  | 1.83607800  | -0.30822000 |
| C  | 2.92052700  | 2.17149300  | -1.61549100 |
| C  | 2.62993500  | 2.81848600  | 0.68652000  |
| C  | 3.34562200  | 3.46061100  | -1.92311200 |
| H  | 2.88156400  | 1.42381000  | -2.40497900 |
| C  | 3.06362800  | 4.10236400  | 0.37844600  |
| H  | 2.32973900  | 2.58707200  | 1.70568900  |
| C  | 3.42039500  | 4.42829600  | -0.92732100 |
| H  | 3.62597300  | 3.70323700  | -2.94550500 |
| H  | 3.12143900  | 4.85279600  | 1.16370300  |
| H  | 3.75824200  | 5.43392400  | -1.16668400 |
| C  | 2.86450100  | -0.93007900 | -1.04358700 |
| C  | 3.99589000  | -1.65414900 | -0.66535200 |
| C  | 2.37000200  | -1.07194200 | -2.34654000 |
| C  | 4.62546400  | -2.49923200 | -1.57656800 |
| H  | 4.38333300  | -1.58005500 | 0.34845800  |
| C  | 3.00703700  | -1.90412900 | -3.25872500 |
| H  | 1.46308800  | -0.54076500 | -2.64012000 |
| C  | 4.13635900  | -2.62338800 | -2.87283000 |
| H  | 5.50130300  | -3.06506400 | -1.26784800 |
| H  | 2.61293100  | -2.00293600 | -4.26728500 |
| H  | 4.62915400  | -3.28512900 | -3.58094100 |
| C  | 2.59607700  | -0.13337000 | 1.77234000  |

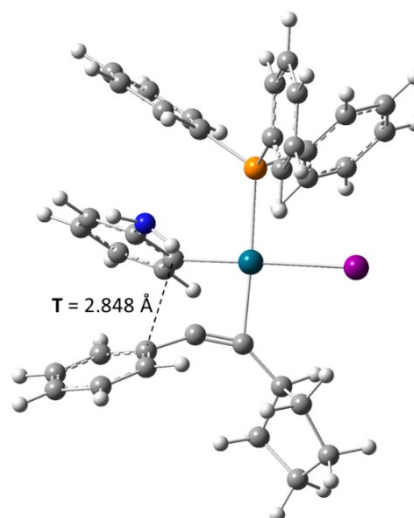

|                                                                                           |             |             |             |
|-------------------------------------------------------------------------------------------|-------------|-------------|-------------|
| C                                                                                         | 3.92199700  | 0.18067700  | 2.09997100  |
| C                                                                                         | 1.75238300  | -0.63953800 | 2.76366800  |
| C                                                                                         | 4.39697400  | -0.03559200 | 3.38815200  |
| H                                                                                         | 4.58313600  | 0.60899100  | 1.34747000  |
| C                                                                                         | 2.22728300  | -0.84975500 | 4.05553800  |
| H                                                                                         | 0.71845800  | -0.87586000 | 2.51292200  |
| C                                                                                         | 3.55028400  | -0.55292100 | 4.36662100  |
| H                                                                                         | 5.42873000  | 0.20672400  | 3.63087300  |
| H                                                                                         | 1.56009300  | -1.24302800 | 4.81859200  |
| H                                                                                         | 3.92291300  | -0.71669800 | 5.37493600  |
| H                                                                                         | -5.86316900 | 4.19046700  | 1.82091700  |
| C                                                                                         | -3.24567100 | -2.02124200 | -0.66737700 |
| C                                                                                         | -3.71464400 | -2.69982100 | 0.62651500  |
| C                                                                                         | -4.57678800 | -1.78656600 | -1.39664200 |
| H                                                                                         | -2.63709300 | -2.74251800 | -1.23273000 |
| C                                                                                         | -4.73151100 | -3.72037000 | 0.11816000  |
| H                                                                                         | -4.20196500 | -1.94077100 | 1.25790700  |
| H                                                                                         | -2.89007200 | -3.13931500 | 1.19878000  |
| C                                                                                         | -5.39046600 | -3.06157800 | -1.11696100 |
| H                                                                                         | -4.44414100 | -1.57500500 | -2.46313000 |
| H                                                                                         | -5.06600500 | -0.91028500 | -0.94617600 |
| H                                                                                         | -4.20677600 | -4.63814100 | -0.17862100 |
| H                                                                                         | -5.45760800 | -4.00440100 | 0.88693100  |
| H                                                                                         | -5.36485200 | -3.74005900 | -1.97721800 |
| H                                                                                         | -6.44453300 | -2.82214900 | -0.93920800 |
| <b>INT1 complex of (cyclopentylethynyl)benzene</b>                                        |             |             |             |
| Energy = -1232514.365113 kcal/mol                                                         |             |             |             |
| Electronic Energy + Thermal Free Energy Correction (353.150 K) = -1232189.350592 kcal/mol |             |             |             |
| Symmetry c1                                                                               |             |             |             |
| Pd                                                                                        | -0.34791700 | -0.28541900 | -0.11636700 |
| P                                                                                         | 2.10072200  | 0.22675000  | -0.03755800 |
| I                                                                                         | 0.15681500  | -2.68411400 | 0.95263600  |
| C                                                                                         | -1.59876700 | 1.60238500  | -0.53299300 |
| C                                                                                         | -1.08757200 | 1.45880300  | -1.85006800 |
| C                                                                                         | -1.14441300 | 2.70304300  | 0.26178300  |
| C                                                                                         | -0.15987400 | 2.35679200  | -2.37590400 |
| H                                                                                         | -1.51458700 | 0.67460300  | -2.47391100 |
| C                                                                                         | -0.25404700 | 3.61628500  | -0.30564800 |
| C                                                                                         | 0.22756900  | 3.44154400  | -1.60036000 |
| H                                                                                         | 0.22576100  | 2.22392200  | -3.38316800 |
| H                                                                                         | 0.08223800  | 4.46502100  | 0.28872300  |
| H                                                                                         | 0.93435200  | 4.16755600  | -1.99782400 |
| N                                                                                         | -1.55493700 | 2.82541000  | 1.56529300  |
| H                                                                                         | -2.40763500 | 2.35208300  | 1.83339200  |
| H                                                                                         | -1.43122800 | 3.72829100  | 2.00113300  |
| C                                                                                         | -2.75188600 | 0.72911300  | -0.11620500 |
| C                                                                                         | -2.38534800 | -0.56058700 | -0.11400100 |
| C                                                                                         | -4.05111600 | 1.36847700  | 0.18897900  |
| C                                                                                         | -4.52881200 | 2.41410200  | -0.61135300 |
| C                                                                                         | -4.78579500 | 1.00105600  | 1.32348100  |
| C                                                                                         | -5.73059700 | 3.04402400  | -0.30960200 |
| H                                                                                         | -3.95197100 | 2.72340000  | -1.48290300 |
| C                                                                                         | -5.98656400 | 1.63346600  | 1.62680500  |
| H                                                                                         | -4.39489200 | 0.22016500  | 1.97482500  |
| C                                                                                         | -6.46524000 | 2.65301300  | 0.80806900  |
| H                                                                                         | -6.09551000 | 3.84530600  | -0.94821100 |
| H                                                                                         | -6.54440700 | 1.33772100  | 2.51238300  |
| C                                                                                         | 2.88138400  | 1.76616400  | -0.68207500 |
| C                                                                                         | 3.43806700  | 1.86719000  | -1.95889900 |

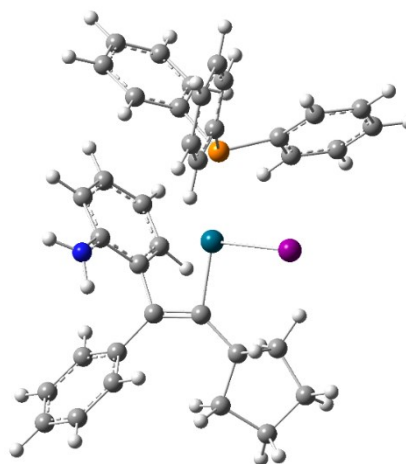

|                                                                                           |             |             |             |
|-------------------------------------------------------------------------------------------|-------------|-------------|-------------|
| C                                                                                         | 2.87322200  | 2.89783300  | 0.14255300  |
| C                                                                                         | 3.98256800  | 3.07224100  | -2.39716400 |
| H                                                                                         | 3.46164000  | 1.00154200  | -2.61796000 |
| C                                                                                         | 3.42268700  | 4.09751200  | -0.29230100 |
| H                                                                                         | 2.43315800  | 2.83985500  | 1.13851700  |
| C                                                                                         | 3.97944700  | 4.18839000  | -1.56610000 |
| H                                                                                         | 4.41956000  | 3.13339400  | -3.39122700 |
| H                                                                                         | 3.41313800  | 4.96452800  | 0.36440000  |
| H                                                                                         | 4.41092800  | 5.12583000  | -1.90882200 |
| C                                                                                         | 2.87993200  | -1.10790500 | -1.01989800 |
| C                                                                                         | 3.83612100  | -1.99326600 | -0.52097200 |
| C                                                                                         | 2.37911500  | -1.30635300 | -2.31422300 |
| C                                                                                         | 4.28810100  | -3.05340400 | -1.30375800 |
| H                                                                                         | 4.21852100  | -1.87662900 | 0.49066800  |
| C                                                                                         | 2.84130000  | -2.35620700 | -3.09925300 |
| H                                                                                         | 1.60473400  | -0.64183200 | -2.70259300 |
| C                                                                                         | 3.79496900  | -3.23608000 | -2.59150700 |
| H                                                                                         | 5.02705000  | -3.74193400 | -0.90059700 |
| H                                                                                         | 2.44606100  | -2.49556500 | -4.10261100 |
| H                                                                                         | 4.14757800  | -4.06652400 | -3.19835400 |
| C                                                                                         | 2.82759800  | 0.18019300  | 1.64218900  |
| C                                                                                         | 4.20786900  | 0.27131300  | 1.86364300  |
| C                                                                                         | 1.96320700  | 0.16470600  | 2.73936400  |
| C                                                                                         | 4.71062900  | 0.30464100  | 3.15897500  |
| H                                                                                         | 4.89217900  | 0.32941900  | 1.01778800  |
| C                                                                                         | 2.46618200  | 0.21124300  | 4.03707800  |
| H                                                                                         | 0.88788400  | 0.11518900  | 2.56912800  |
| C                                                                                         | 3.83980100  | 0.27174800  | 4.24700700  |
| H                                                                                         | 5.78407200  | 0.36631400  | 3.32055300  |
| H                                                                                         | 1.78317200  | 0.20207100  | 4.88292100  |
| H                                                                                         | 4.23508100  | 0.30432800  | 5.25948100  |
| H                                                                                         | -7.40242400 | 3.15047600  | 1.04618900  |
| C                                                                                         | -3.12664700 | -1.84572600 | -0.18539900 |
| C                                                                                         | -4.66071600 | -1.77749600 | -0.28497000 |
| C                                                                                         | -2.78184300 | -2.62923200 | -1.46435100 |
| H                                                                                         | -2.84757200 | -2.48177000 | 0.67082000  |
| C                                                                                         | -5.08079300 | -3.14187500 | -0.86513000 |
| H                                                                                         | -4.93375900 | -0.96656300 | -0.97522100 |
| H                                                                                         | -5.14408300 | -1.55510300 | 0.67189700  |
| C                                                                                         | -3.79984100 | -3.76293500 | -1.46113600 |
| H                                                                                         | -1.73924900 | -2.96598900 | -1.48404000 |
| H                                                                                         | -2.93640300 | -1.96134200 | -2.32777400 |
| H                                                                                         | -5.50434700 | -3.78864700 | -0.08807600 |
| H                                                                                         | -5.86146400 | -3.01666000 | -1.62419300 |
| H                                                                                         | -3.43291700 | -4.57064400 | -0.81221800 |
| H                                                                                         | -3.95728600 | -4.19885500 | -2.45359900 |
| <b>TS2 complex of (cyclopentylethynyl)benzene</b>                                         |             |             |             |
| Energy = -1232484.797517 kcal/mol                                                         |             |             |             |
| Electronic Energy + Thermal Free Energy Correction (353.150 K) = -1232159.014297 kcal/mol |             |             |             |
| Imaginary frequency = -290.25 cm <sup>-1</sup>                                            |             |             |             |
| Symmetry c1                                                                               |             |             |             |
| Pd                                                                                        | -0.40649900 | -0.08703700 | -0.09042000 |
| P                                                                                         | 1.99153500  | -0.14006600 | -0.07945000 |
| I                                                                                         | -0.46141500 | -2.84166900 | -0.08700300 |
| C                                                                                         | -0.47513600 | 1.98776400  | 0.17555800  |
| C                                                                                         | 0.10733900  | 2.87049500  | -0.74056700 |
| C                                                                                         | -0.76894900 | 2.43184300  | 1.48322700  |
| C                                                                                         | 0.36462500  | 4.19295900  | -0.40927300 |
| H                                                                                         | 0.34913000  | 2.50898600  | -1.74108200 |

|   |             |             |             |
|---|-------------|-------------|-------------|
| C | -0.48885700 | 3.77181500  | 1.81068500  |
| C | 0.06109200  | 4.63765900  | 0.87911100  |
| H | 0.81427900  | 4.86301100  | -1.13802800 |
| H | -0.71382100 | 4.12016000  | 2.81850100  |
| H | 0.26453000  | 5.66782100  | 1.16355000  |
| N | -1.37280100 | 1.60907600  | 2.42049600  |
| H | -1.17364500 | 0.62085000  | 2.33416300  |
| H | -1.32071300 | 1.93198100  | 3.37754200  |
| C | -2.55778900 | 0.05843500  | -0.11452300 |
| C | -2.24865000 | 1.16338700  | -0.64832700 |
| C | -3.52104900 | -0.93004700 | 0.30071100  |
| C | -3.97278500 | -0.95210700 | 1.62730300  |
| C | -4.03883800 | -1.85294400 | -0.61896900 |
| C | -4.93162900 | -1.87767700 | 2.02241400  |
| H | -3.56701100 | -0.23073000 | 2.33497600  |
| C | -4.99815500 | -2.77293100 | -0.21602600 |
| H | -3.67790600 | -1.83966000 | -1.64547000 |
| C | -5.44478400 | -2.79064000 | 1.10418000  |
| H | -5.27984500 | -1.88525300 | 3.05250200  |
| H | -5.39935900 | -3.48179500 | -0.93651600 |
| C | 2.89276400  | 1.45142900  | -0.21186100 |
| C | 3.44224000  | 1.91017000  | -1.41038400 |
| C | 2.97442800  | 2.25618500  | 0.93061700  |
| C | 4.06688900  | 3.15405500  | -1.46487700 |
| H | 3.39487300  | 1.29526100  | -2.30681100 |
| C | 3.59745100  | 3.49546300  | 0.87334600  |
| H | 2.54458500  | 1.91015100  | 1.87083300  |
| C | 4.14540100  | 3.94753600  | -0.32560200 |
| H | 4.49713000  | 3.49895500  | -2.40221100 |
| H | 3.65020100  | 4.11371500  | 1.76663400  |
| H | 4.63365500  | 4.91821800  | -0.36983800 |
| C | 2.57044100  | -1.12173800 | -1.50937600 |
| C | 3.50029800  | -2.15838800 | -1.41837200 |
| C | 1.97767200  | -0.84146000 | -2.74751200 |
| C | 3.83668300  | -2.89797800 | -2.54964800 |
| H | 3.95169600  | -2.40908900 | -0.46097400 |
| C | 2.32700100  | -1.56960500 | -3.87802800 |
| H | 1.22337800  | -0.05605200 | -2.82052600 |
| C | 3.25597900  | -2.60344600 | -3.77895200 |
| H | 4.55558500  | -3.70942400 | -2.46594300 |
| H | 1.86367900  | -1.33971800 | -4.83435600 |
| H | 3.52140400  | -3.18317400 | -4.65965400 |
| C | 2.75273700  | -0.84402100 | 1.42738700  |
| C | 4.14581800  | -0.87540500 | 1.57886900  |
| C | 1.94290600  | -1.27155100 | 2.48156900  |
| C | 4.71330000  | -1.35871200 | 2.75132900  |
| H | 4.79004300  | -0.50902900 | 0.78034300  |
| C | 2.51295500  | -1.74397800 | 3.66123200  |
| H | 0.85979900  | -1.23795100 | 2.37215800  |
| C | 3.89658300  | -1.79404900 | 3.79342500  |
| H | 5.79493700  | -1.38621100 | 2.85668600  |
| H | 1.87316000  | -2.07056800 | 4.47727700  |
| H | 4.34169600  | -2.16479900 | 4.71363900  |
| H | -6.19291200 | -3.51520400 | 1.41630200  |
| C | -2.74824200 | 2.27413700  | -1.50514500 |
| C | -3.99890100 | 1.79671800  | -2.26051100 |
| C | -3.31923500 | 3.42590800  | -0.66666000 |
| H | -1.95487600 | 2.60746700  | -2.18310500 |
| C | -5.13972600 | 1.88533200  | -1.23249700 |
| H | -3.87877900 | 0.79932300  | -2.69870600 |

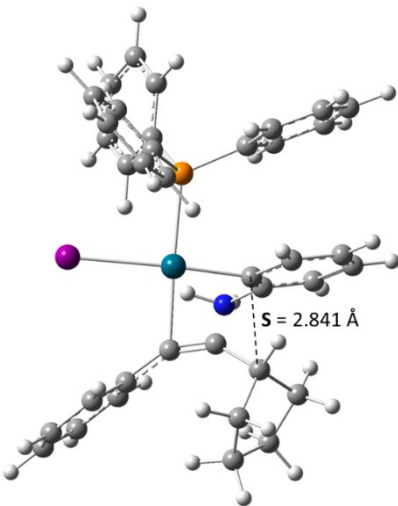

|                                                                                           |             |             |             |
|-------------------------------------------------------------------------------------------|-------------|-------------|-------------|
| H                                                                                         | -4.17303500 | 2.49870800  | -3.08662900 |
| C                                                                                         | -4.64857700 | 2.87087600  | -0.14713600 |
| H                                                                                         | -3.49124200 | 4.27683300  | -1.33997200 |
| H                                                                                         | -2.64523400 | 3.76022500  | 0.12894400  |
| H                                                                                         | -6.07037100 | 2.21949000  | -1.70372600 |
| H                                                                                         | -5.34387700 | 0.89979900  | -0.79432200 |
| H                                                                                         | -5.37241300 | 3.66519000  | 0.06301000  |
| H                                                                                         | -4.47797700 | 2.33920400  | 0.79931400  |
| <b>INT2 complex of (cyclopentylethynyl)benzene</b>                                        |             |             |             |
| Energy = -1232517.164431 kcal/mol                                                         |             |             |             |
| Electronic Energy + Thermal Free Energy Correction (353.150 K) = -1232192.166225 kcal/mol |             |             |             |
| Symmetry c1                                                                               |             |             |             |
| Pd                                                                                        | -0.33337600 | -0.05165400 | -0.16906000 |
| P                                                                                         | 2.11330200  | -0.02538900 | 0.11133000  |
| I                                                                                         | -0.32722900 | -2.69103200 | -0.52000800 |
| C                                                                                         | -1.23330900 | 2.11083300  | -0.50840100 |
| C                                                                                         | -0.72973100 | 2.07588600  | -1.83201200 |
| C                                                                                         | -0.64780800 | 3.01838300  | 0.42251800  |
| C                                                                                         | 0.32016300  | 2.89335800  | -2.23139700 |
| H                                                                                         | -1.22902300 | 1.42113700  | -2.54464900 |
| C                                                                                         | 0.38377200  | 3.86202300  | -0.00960000 |
| C                                                                                         | 0.85603200  | 3.79621900  | -1.31148200 |
| H                                                                                         | 0.68899100  | 2.85552900  | -3.25305200 |
| H                                                                                         | 0.81420700  | 4.57189600  | 0.69408700  |
| H                                                                                         | 1.66201200  | 4.46179700  | -1.61334000 |
| N                                                                                         | -1.14647700 | 3.10418600  | 1.69976400  |
| H                                                                                         | -1.63307200 | 2.28889200  | 2.05030500  |
| H                                                                                         | -0.55610800 | 3.55206300  | 2.38731300  |
| C                                                                                         | -2.37914500 | 0.08096700  | -0.12091400 |
| C                                                                                         | -2.51960900 | 1.40638000  | -0.17496500 |
| C                                                                                         | -3.34108700 | -0.97944600 | 0.14846300  |
| C                                                                                         | -3.53244500 | -1.44827600 | 1.45713500  |
| C                                                                                         | -4.07592700 | -1.56815900 | -0.88996200 |
| C                                                                                         | -4.44935800 | -2.45726400 | 1.72118600  |
| H                                                                                         | -2.94492000 | -1.01098000 | 2.26473800  |
| C                                                                                         | -4.99253400 | -2.57957700 | -0.62382800 |
| H                                                                                         | -3.90950200 | -1.23089900 | -1.91240800 |
| C                                                                                         | -5.18392200 | -3.02688700 | 0.68152900  |
| H                                                                                         | -4.59129500 | -2.80439200 | 2.74226200  |
| H                                                                                         | -5.55723300 | -3.02401900 | -1.44031200 |
| C                                                                                         | 2.97743700  | 1.56744600  | 0.41505000  |
| C                                                                                         | 3.90616700  | 2.13842800  | -0.45487000 |
| C                                                                                         | 2.65653300  | 2.23312300  | 1.60450100  |
| C                                                                                         | 4.50706400  | 3.35583000  | -0.13744300 |
| H                                                                                         | 4.17041500  | 1.63318400  | -1.38179300 |
| C                                                                                         | 3.26530900  | 3.43877300  | 1.92554800  |
| H                                                                                         | 1.92649700  | 1.79901500  | 2.29025200  |
| C                                                                                         | 4.18993100  | 4.00651200  | 1.04988400  |
| H                                                                                         | 5.23183700  | 3.79075800  | -0.82187900 |
| H                                                                                         | 3.01241500  | 3.94214600  | 2.85608700  |
| H                                                                                         | 4.66460200  | 4.95331200  | 1.29624800  |
| C                                                                                         | 2.94414600  | -0.75071400 | -1.34785500 |
| C                                                                                         | 3.69661500  | -1.92573800 | -1.29702300 |
| C                                                                                         | 2.69876500  | -0.15122700 | -2.59074100 |
| C                                                                                         | 4.21457200  | -2.47916700 | -2.46554100 |
| H                                                                                         | 3.87179000  | -2.42103900 | -0.34422100 |
| C                                                                                         | 3.22966700  | -0.69713100 | -3.75343100 |
| H                                                                                         | 2.08420800  | 0.74962200  | -2.64595200 |
| C                                                                                         | 3.98864600  | -1.86446200 | -3.69253200 |

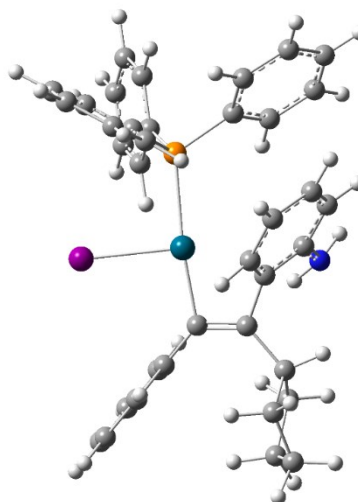



|                                                                                           |             |             |             |
|-------------------------------------------------------------------------------------------|-------------|-------------|-------------|
| H                                                                                         | 4.79725800  | -3.39584800 | -2.41366700 |
| H                                                                                         | 3.04227200  | -0.21673200 | -4.71080500 |
| H                                                                                         | 4.39590600  | -2.29707200 | -4.60318300 |
| C                                                                                         | 2.71017500  | -0.96924400 | 1.56625100  |
| C                                                                                         | 4.07838200  | -1.05964600 | 1.85454700  |
| C                                                                                         | 1.78873500  | -1.52356300 | 2.45711400  |
| C                                                                                         | 4.51321400  | -1.72072200 | 2.99642500  |
| H                                                                                         | 4.80666700  | -0.60641300 | 1.18199900  |
| C                                                                                         | 2.22492500  | -2.17560400 | 3.60854000  |
| H                                                                                         | 0.72338900  | -1.44436100 | 2.24136800  |
| C                                                                                         | 3.58585600  | -2.27991600 | 3.87468900  |
| H                                                                                         | 5.57740500  | -1.79259400 | 3.20766400  |
| H                                                                                         | 1.49863900  | -2.60002800 | 4.29750000  |
| H                                                                                         | 3.92752800  | -2.79105900 | 4.77162700  |
| H                                                                                         | -5.90008700 | -3.81853200 | 0.88834000  |
| C                                                                                         | -3.77581500 | 2.23287500  | -0.00445000 |
| C                                                                                         | -4.75761600 | 2.06758600  | -1.18851100 |
| C                                                                                         | -4.62398200 | 1.93794300  | 1.26467100  |
| H                                                                                         | -3.45604500 | 3.28465600  | 0.02826100  |
| C                                                                                         | -6.13192000 | 2.29404000  | -0.56854500 |
| H                                                                                         | -4.70030300 | 1.03807400  | -1.56852400 |
| H                                                                                         | -4.52003400 | 2.73918500  | -2.02184000 |
| C                                                                                         | -6.01600400 | 1.54943600  | 0.75845400  |
| H                                                                                         | -4.68138800 | 2.84640100  | 1.87858200  |
| H                                                                                         | -4.17497900 | 1.15872700  | 1.89084200  |
| H                                                                                         | -6.29081800 | 3.36685500  | -0.38208100 |
| H                                                                                         | -6.95484800 | 1.94274300  | -1.20142500 |
| H                                                                                         | -6.81352300 | 1.78957100  | 1.47035000  |
| H                                                                                         | -6.05397600 | 0.46494300  | 0.57216100  |
| <b>ADS complex of (3-methylbut-1-yn-1-yl)benzene</b>                                      |             |             |             |
| Energy = -1183955.445228 kcal/mol                                                         |             |             |             |
| Electronic Energy + Thermal Free Energy Correction (353.150 K) = -1183653.369298 kcal/mol |             |             |             |
| Symmetry c1                                                                               |             |             |             |
| Pd                                                                                        | 0.59668800  | 0.10898200  | -0.44338400 |
| P                                                                                         | -1.63480300 | -0.13407000 | 0.30296200  |
| I                                                                                         | 0.84214300  | -2.68110100 | -1.13098400 |
| C                                                                                         | 0.47899100  | 2.10573600  | -0.06795600 |
| C                                                                                         | 0.99045400  | 2.58649200  | 1.13777900  |
| C                                                                                         | 0.00126200  | 3.01494100  | -1.03451200 |
| C                                                                                         | 1.07052300  | 3.96134400  | 1.39913500  |
| H                                                                                         | 1.34735500  | 1.88650600  | 1.88825600  |
| C                                                                                         | 0.09925000  | 4.39502800  | -0.77135100 |
| C                                                                                         | 0.62742600  | 4.86322900  | 0.43032200  |
| H                                                                                         | 1.47560400  | 4.31367700  | 2.34354600  |
| H                                                                                         | -0.25758700 | 5.09912200  | -1.52040400 |
| H                                                                                         | 0.68745800  | 5.93364500  | 0.60730300  |
| N                                                                                         | -0.63775700 | 2.58172500  | -2.20715400 |
| H                                                                                         | -0.39694200 | 1.64319100  | -2.49833900 |
| H                                                                                         | -0.59685500 | 3.23447300  | -2.98031300 |
| C                                                                                         | 3.08433800  | 0.27435200  | -0.37654100 |
| C                                                                                         | 2.70652000  | 0.62613900  | -1.49393300 |
| C                                                                                         | 3.65971400  | -0.04968400 | 0.89653500  |
| C                                                                                         | 4.12143200  | 0.98667900  | 1.73440000  |
| C                                                                                         | 3.81702800  | -1.38940600 | 1.30455300  |
| C                                                                                         | 4.72255600  | 0.68389700  | 2.95444200  |
| H                                                                                         | 4.00500600  | 2.01777200  | 1.41913000  |
| C                                                                                         | 4.41739700  | -1.67986600 | 2.52713200  |
| H                                                                                         | 3.45756500  | -2.18398000 | 0.65989100  |
| C                                                                                         | 4.87019200  | -0.64713100 | 3.35442700  |

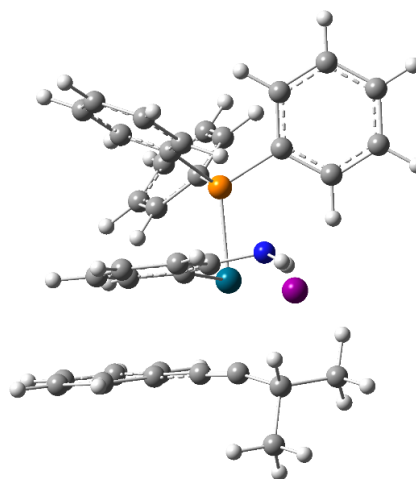

|                                                                                           |             |             |             |
|-------------------------------------------------------------------------------------------|-------------|-------------|-------------|
| H                                                                                         | 5.07698300  | 1.48763500  | 3.59247400  |
| H                                                                                         | 4.53479800  | -2.71447800 | 2.83488600  |
| C                                                                                         | -2.44507000 | 1.25167400  | 1.21681300  |
| C                                                                                         | -2.64360400 | 1.20988200  | 2.60435600  |
| C                                                                                         | -2.87208700 | 2.38244600  | 0.49890400  |
| C                                                                                         | -3.25980500 | 2.27848000  | 3.26193300  |
| H                                                                                         | -2.32932800 | 0.34602300  | 3.17863700  |
| C                                                                                         | -3.49057000 | 3.44291700  | 1.15924000  |
| H                                                                                         | -2.71771700 | 2.43666400  | -0.57410700 |
| C                                                                                         | -3.68582400 | 3.39503700  | 2.54277100  |
| H                                                                                         | -3.41021300 | 2.22954800  | 4.33632900  |
| H                                                                                         | -3.81864300 | 4.30898100  | 0.59195300  |
| H                                                                                         | -4.16791300 | 4.22278800  | 3.05445100  |
| C                                                                                         | -1.70108800 | -1.54036100 | 1.49142000  |
| C                                                                                         | -2.71861600 | -2.50373100 | 1.46481600  |
| C                                                                                         | -0.69654700 | -1.63102000 | 2.46976300  |
| C                                                                                         | -2.73246300 | -3.53767800 | 2.40450900  |
| H                                                                                         | -3.49746500 | -2.45939900 | 0.71188400  |
| C                                                                                         | -0.72103400 | -2.65705700 | 3.41411300  |
| H                                                                                         | 0.11141900  | -0.90503700 | 2.48790100  |
| C                                                                                         | -1.73837900 | -3.61510900 | 3.38130700  |
| H                                                                                         | -3.52265300 | -4.28170500 | 2.36959900  |
| H                                                                                         | 0.05858200  | -2.71314700 | 4.16782900  |
| H                                                                                         | -1.75284500 | -4.41908200 | 4.11105600  |
| C                                                                                         | -2.84595800 | -0.49588600 | -1.03613900 |
| C                                                                                         | -2.40120000 | -0.85354600 | -2.31750000 |
| C                                                                                         | -4.22864700 | -0.40745800 | -0.79311600 |
| C                                                                                         | -3.31931700 | -1.12572200 | -3.33417500 |
| H                                                                                         | -1.33782000 | -0.92969800 | -2.51644200 |
| C                                                                                         | -5.14255900 | -0.68660400 | -1.80956800 |
| H                                                                                         | -4.59474100 | -0.11321700 | 0.18493300  |
| C                                                                                         | -4.68989700 | -1.04508700 | -3.08196500 |
| H                                                                                         | -2.96058700 | -1.39765600 | -4.32235400 |
| H                                                                                         | -6.20715500 | -0.61744900 | -1.60764500 |
| H                                                                                         | -5.40301200 | -1.25537700 | -3.87344300 |
| C                                                                                         | 2.71243800  | 1.12444500  | -2.88923500 |
| H                                                                                         | 5.33848400  | -0.87935800 | 4.30620100  |
| H                                                                                         | 1.88728200  | 1.83819200  | -2.99374600 |
| C                                                                                         | 2.49963800  | -0.00819900 | -3.91129800 |
| H                                                                                         | 1.56107700  | -0.53713400 | -3.73047700 |
| H                                                                                         | 2.47830700  | 0.41140800  | -4.92169200 |
| H                                                                                         | 3.31553000  | -0.73591700 | -3.85817600 |
| C                                                                                         | 4.03133400  | 1.88224400  | -3.15290000 |
| H                                                                                         | 4.02345600  | 2.29009500  | -4.16850900 |
| H                                                                                         | 4.16110300  | 2.70899500  | -2.44925900 |
| H                                                                                         | 4.88961500  | 1.20960700  | -3.05877200 |
| <b>TS1 complex of (3-methylbut-1-yn-1-yl)benzene</b>                                      |             |             |             |
| Energy = -1183941.747334 kcal/mol                                                         |             |             |             |
| Electronic Energy + Thermal Free Energy Correction (353.150 K) = -1183639.830164 kcal/mol |             |             |             |
| Imaginary frequency = -314.62 cm <sup>-1</sup>                                            |             |             |             |
| Symmetry c1                                                                               |             |             |             |
| Pd                                                                                        | -0.42681400 | -0.67119900 | -0.06530100 |
| P                                                                                         | 1.64940400  | 0.56854500  | 0.07144000  |
| I                                                                                         | 0.88255900  | -2.99704800 | 0.63464500  |
| C                                                                                         | -1.51246800 | 1.02852900  | -0.61722000 |
| C                                                                                         | -1.68044600 | 1.24047300  | -1.98774300 |
| C                                                                                         | -1.66312700 | 2.09774500  | 0.28862200  |
| C                                                                                         | -1.96734500 | 2.50977700  | -2.48505100 |

|   |             |             |             |
|---|-------------|-------------|-------------|
| H | -1.60342800 | 0.39141200  | -2.66797100 |
| C | -1.97793000 | 3.36510500  | -0.22155900 |
| C | -2.12100700 | 3.56731500  | -1.58720900 |
| H | -2.08817600 | 2.66610100  | -3.55404200 |
| H | -2.08783700 | 4.19779500  | 0.47335900  |
| H | -2.36035900 | 4.56281200  | -1.95502800 |
| N | -1.45316400 | 1.91701400  | 1.64175100  |
| H | -1.52722700 | 0.96410500  | 1.97604100  |
| H | -1.88757600 | 2.59258200  | 2.25608700  |
| C | -2.80365000 | -0.61579500 | -0.14702100 |
| C | -2.22347000 | -1.70116800 | -0.45370000 |
| C | -3.97324200 | 0.04316300  | 0.40020900  |
| C | -4.64339600 | 1.05985000  | -0.29181500 |
| C | -4.48263900 | -0.41402800 | 1.62353200  |
| C | -5.81317700 | 1.59671500  | 0.22727600  |
| H | -4.23692400 | 1.41787300  | -1.23590000 |
| C | -5.65076200 | 0.13404100  | 2.14120700  |
| H | -3.95280400 | -1.20233100 | 2.15538000  |
| C | -6.31664600 | 1.13809100  | 1.44407600  |
| H | -6.33572900 | 2.37910400  | -0.31748100 |
| H | -6.04046400 | -0.22424300 | 3.09080400  |
| C | 1.73665300  | 2.30063300  | -0.53849600 |
| C | 2.15114900  | 2.61313900  | -1.83660100 |
| C | 1.33673600  | 3.33774200  | 0.31290700  |
| C | 2.16576600  | 3.93522200  | -2.27314200 |
| H | 2.47811000  | 1.82731300  | -2.51387600 |
| C | 1.35834200  | 4.65682400  | -0.12385900 |
| H | 1.00301300  | 3.10923900  | 1.32416000  |
| C | 1.76958300  | 4.95944100  | -1.41918700 |
| H | 2.49583500  | 4.16266100  | -3.28407500 |
| H | 1.04547000  | 5.45121200  | 0.55013100  |
| H | 1.78455100  | 5.99188600  | -1.76018000 |
| C | 2.80453200  | -0.32440000 | -1.03586300 |
| C | 4.10223200  | -0.68659300 | -0.67494900 |
| C | 2.31249200  | -0.70844200 | -2.29040200 |
| C | 4.89426500  | -1.42358100 | -1.55308800 |
| H | 4.49757700  | -0.41228200 | 0.30106700  |
| C | 3.10838300  | -1.42997600 | -3.17112900 |
| H | 1.28878700  | -0.45167800 | -2.57023100 |
| C | 4.40108100  | -1.79531000 | -2.79936400 |
| H | 5.90108900  | -1.70911000 | -1.25763200 |
| H | 2.71567300  | -1.71932600 | -4.14289900 |
| H | 5.02145700  | -2.37197700 | -3.48113100 |
| C | 2.46645400  | 0.69561900  | 1.70156900  |
| C | 3.63836100  | 1.44463900  | 1.87106000  |
| C | 1.88870500  | 0.07084300  | 2.80931800  |
| C | 4.23058800  | 1.54677700  | 3.12420300  |
| H | 4.08426500  | 1.95819100  | 1.01982900  |
| C | 2.47998200  | 0.17955300  | 4.06550000  |
| H | 0.97289700  | -0.50494300 | 2.68099400  |
| C | 3.65125600  | 0.91340900  | 4.22221300  |
| H | 5.14195700  | 2.12695400  | 3.24582000  |
| H | 2.02102500  | -0.30781400 | 4.92228300  |
| H | 4.11185400  | 0.99968800  | 5.20348900  |
| C | -2.41297500 | -3.06839000 | -0.99968700 |
| H | -7.23072300 | 1.56570300  | 1.84911000  |
| H | -1.83360300 | -3.76609900 | -0.37910900 |
| C | -1.87167600 | -3.13515900 | -2.42755000 |
| H | -0.80567000 | -2.87910000 | -2.46086500 |
| H | -2.00050300 | -4.14352500 | -2.83746400 |

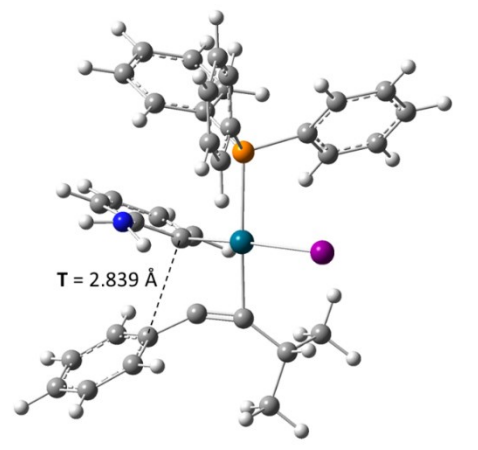

|   |             |             |             |
|---|-------------|-------------|-------------|
| H | -2.41463800 | -2.43226100 | -3.07325200 |
| C | -3.89270900 | -3.44161300 | -0.95044000 |
| H | -4.28069200 | -3.41577900 | 0.07379900  |
| H | -4.48444400 | -2.74283900 | -1.55632400 |
| H | -4.04321100 | -4.45105600 | -1.35084400 |

**INT1 complex of (3-methylbut-1-yn-1-yl)benzene**

Energy = -1183972.012093 kcal/mol

Electronic Energy + Thermal Free Energy Correction (353.150 K) = -1183668.642867 kcal/mol

Symmetry c1

|    |             |             |             |
|----|-------------|-------------|-------------|
| Pd | 0.41269000  | -0.58706300 | 0.21520000  |
| P  | -1.87012200 | 0.44292300  | 0.06754300  |
| I  | -0.54145600 | -2.95258800 | -0.48606800 |
| C  | 1.98651200  | 1.15196100  | 0.14364800  |
| C  | 1.40094700  | 1.60663300  | 1.34923200  |
| C  | 1.85035100  | 1.95460800  | -1.03219500 |
| C  | 0.69538100  | 2.80771100  | 1.41012600  |
| H  | 1.60223900  | 1.03312700  | 2.25397700  |
| C  | 1.17030000  | 3.17046200  | -0.94222000 |
| C  | 0.60802800  | 3.58549900  | 0.26085400  |
| H  | 0.25409400  | 3.13983100  | 2.34569600  |
| H  | 1.08123600  | 3.79471600  | -1.82957500 |
| H  | 0.09290100  | 4.54336200  | 0.29491800  |
| N  | 2.36875900  | 1.51307400  | -2.21987700 |
| H  | 3.07509600  | 0.79069300  | -2.18554700 |
| H  | 2.49034700  | 2.19036800  | -2.95861900 |
| C  | 2.98228800  | 0.02853100  | 0.19788000  |
| C  | 2.38830400  | -1.16095900 | 0.38364500  |
| C  | 4.41864100  | 0.38285500  | 0.16018200  |
| C  | 4.83321500  | 1.63463000  | 0.63887100  |
| C  | 5.39175300  | -0.47862300 | -0.36684800 |
| C  | 6.17420500  | 1.99861400  | 0.62250800  |
| H  | 4.09178100  | 2.32684800  | 1.03779600  |
| C  | 6.73388100  | -0.11424400 | -0.38114500 |
| H  | 5.09165600  | -1.43309900 | -0.79372800 |
| C  | 7.13221200  | 1.12278100  | 0.11771500  |
| H  | 6.47327200  | 2.97094900  | 1.00759300  |
| H  | 7.47076900  | -0.79826200 | -0.79618300 |
| C  | -2.50898200 | 1.11003500  | 1.64944000  |
| C  | -3.78076700 | 1.68845600  | 1.75712000  |
| C  | -1.73632000 | 0.95386700  | 2.80281000  |
| C  | -4.24598700 | 2.13899800  | 2.98677800  |
| H  | -4.41631100 | 1.77478600  | 0.87659700  |
| C  | -2.20642800 | 1.39541800  | 4.03707100  |
| H  | -0.75977900 | 0.47622200  | 2.72825500  |
| C  | -3.45727100 | 1.99672800  | 4.12731300  |
| H  | -5.23129400 | 2.59318800  | 3.05841100  |
| H  | -1.59584400 | 1.26507100  | 4.92710500  |
| H  | -3.82614500 | 2.34555500  | 5.08889700  |
| C  | -3.28986400 | -0.60621000 | -0.45269300 |
| C  | -3.76157800 | -0.64015900 | -1.76607900 |
| C  | -3.85394100 | -1.47038800 | 0.49309800  |
| C  | -4.77825100 | -1.52165900 | -2.12691800 |
| H  | -3.34212600 | 0.02589100  | -2.51743100 |
| C  | -4.87330100 | -2.34345400 | 0.13409300  |
| H  | -3.49212900 | -1.46254800 | 1.52099000  |
| C  | -5.33573200 | -2.37450100 | -1.18006400 |
| H  | -5.13885000 | -1.53386300 | -3.15289400 |
| H  | -5.30572700 | -3.00477300 | 0.88134300  |
| H  | -6.13247200 | -3.05846500 | -1.46260800 |

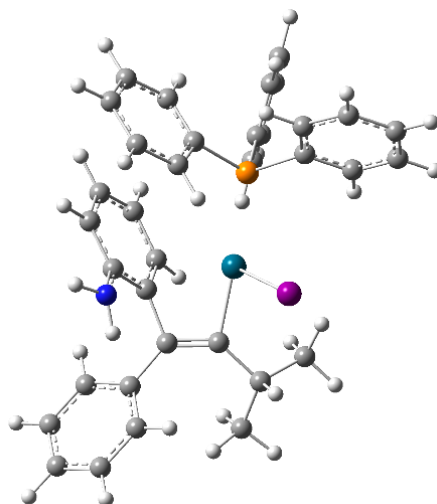

|                                                                                           |             |             |             |
|-------------------------------------------------------------------------------------------|-------------|-------------|-------------|
| C                                                                                         | -1.88736600 | 1.80541600  | -1.15361500 |
| C                                                                                         | -2.43195200 | 3.07070000  | -0.92763600 |
| C                                                                                         | -1.28529000 | 1.53416400  | -2.38890500 |
| C                                                                                         | -2.39257900 | 4.04045500  | -1.92616900 |
| H                                                                                         | -2.87699500 | 3.31235400  | 0.03521700  |
| C                                                                                         | -1.25884100 | 2.49778800  | -3.39024200 |
| H                                                                                         | -0.82627100 | 0.55873100  | -2.56178100 |
| C                                                                                         | -1.81315300 | 3.75492400  | -3.15875900 |
| H                                                                                         | -2.81681100 | 5.02394700  | -1.73766400 |
| H                                                                                         | -0.79270900 | 2.27180400  | -4.34654300 |
| H                                                                                         | -1.78646600 | 4.51365300  | -3.93720600 |
| C                                                                                         | 3.05149800  | -2.45368400 | 0.76133500  |
| C                                                                                         | 3.19673200  | -3.45015700 | -0.38702000 |
| H                                                                                         | 3.64540300  | -2.98817300 | -1.27532100 |
| H                                                                                         | 3.83735100  | -4.28542700 | -0.07751900 |
| H                                                                                         | 2.22348700  | -3.85722700 | -0.68043700 |
| C                                                                                         | 2.40324000  | -3.10243500 | 1.98071500  |
| H                                                                                         | 2.33981500  | -2.39618900 | 2.81769400  |
| H                                                                                         | 1.38797700  | -3.44446200 | 1.74837400  |
| H                                                                                         | 2.99220300  | -3.96851100 | 2.30727500  |
| H                                                                                         | 8.18165500  | 1.40697500  | 0.10397800  |
| H                                                                                         | 4.07330700  | -2.15897800 | 1.06380400  |
| <b>TS2 complex of (3-methylbut-1-yn-1-yl)benzene</b>                                      |             |             |             |
| Energy = -1183940.224370 kcal/mol                                                         |             |             |             |
| Electronic Energy + Thermal Free Energy Correction (353.150 K) = -1183639.776198 kcal/mol |             |             |             |
| Imaginary frequency = -297.97 cm <sup>-1</sup>                                            |             |             |             |
| Symmetry c1                                                                               |             |             |             |
| Pd                                                                                        | -0.60172600 | 0.14582900  | -0.14921600 |
| P                                                                                         | 1.72319400  | -0.42121200 | -0.02056200 |
| I                                                                                         | -1.24897500 | -2.53307600 | -0.27182800 |
| C                                                                                         | -0.23383200 | 2.19918500  | 0.04271600  |
| C                                                                                         | 0.51931700  | 2.89812700  | -0.90926400 |
| C                                                                                         | -0.38101600 | 2.73638100  | 1.34044500  |
| C                                                                                         | 1.06595900  | 4.14190000  | -0.63103700 |
| H                                                                                         | 0.65669000  | 2.45867900  | -1.89829800 |
| C                                                                                         | 0.18238900  | 3.99688100  | 1.61210500  |
| C                                                                                         | 0.88661800  | 4.69000300  | 0.64137200  |
| H                                                                                         | 1.63852900  | 4.67110100  | -1.38878500 |
| H                                                                                         | 0.06224900  | 4.41845300  | 2.60994600  |
| H                                                                                         | 1.31209200  | 5.66180500  | 0.88232200  |
| N                                                                                         | -1.09926400 | 2.07725100  | 2.32390100  |
| H                                                                                         | -1.06478500 | 1.06681400  | 2.28651000  |
| H                                                                                         | -0.97301200 | 2.43252300  | 3.26246400  |
| C                                                                                         | -2.66948100 | 0.76193100  | -0.16938600 |
| C                                                                                         | -2.13412800 | 1.76404200  | -0.72843500 |
| C                                                                                         | -3.79456300 | -0.02071200 | 0.27728600  |
| C                                                                                         | -4.10964100 | -0.08217100 | 1.64133000  |
| C                                                                                         | -4.58642600 | -0.72054200 | -0.64447500 |
| C                                                                                         | -5.19982200 | -0.82712100 | 2.07324900  |
| H                                                                                         | -3.49051300 | 0.46446000  | 2.35030100  |
| C                                                                                         | -5.67381100 | -1.46459000 | -0.20443100 |
| H                                                                                         | -4.33196300 | -0.68176800 | -1.70202100 |
| C                                                                                         | -5.98192700 | -1.52260200 | 1.15336100  |
| H                                                                                         | -5.43989700 | -0.86606600 | 3.13306500  |
| H                                                                                         | -6.28398400 | -2.00341900 | -0.92533200 |
| C                                                                                         | 2.94083200  | 0.94538400  | -0.08913400 |
| C                                                                                         | 3.72140400  | 1.20921800  | -1.21595400 |
| C                                                                                         | 3.05535600  | 1.77383500  | 1.03343400  |
| C                                                                                         | 4.60543400  | 2.28598200  | -1.21850300 |

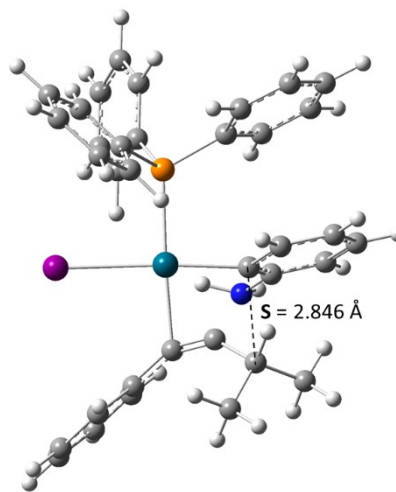

|                                                                                           |             |             |             |
|-------------------------------------------------------------------------------------------|-------------|-------------|-------------|
| H                                                                                         | 3.65021600  | 0.56982600  | -2.09387300 |
| C                                                                                         | 3.93703000  | 2.84563800  | 1.02772100  |
| H                                                                                         | 2.44153500  | 1.58464600  | 1.91500400  |
| C                                                                                         | 4.71501200  | 3.10424400  | -0.09968100 |
| H                                                                                         | 5.21375400  | 2.48009900  | -2.09877500 |
| H                                                                                         | 4.01180700  | 3.48616900  | 1.90363400  |
| H                                                                                         | 5.40574600  | 3.94408900  | -0.10366200 |
| C                                                                                         | 2.18020500  | -1.51442300 | -1.41287900 |
| C                                                                                         | 2.87329600  | -2.71604100 | -1.26232300 |
| C                                                                                         | 1.74379800  | -1.13016600 | -2.68696700 |
| C                                                                                         | 3.13031400  | -3.51872000 | -2.37147100 |
| H                                                                                         | 3.20109600  | -3.04112200 | -0.27698000 |
| C                                                                                         | 2.01483700  | -1.92431900 | -3.79411300 |
| H                                                                                         | 1.17207000  | -0.20872800 | -2.80724700 |
| C                                                                                         | 2.70569600  | -3.12439000 | -3.63605900 |
| H                                                                                         | 3.66272500  | -4.45807500 | -2.24307100 |
| H                                                                                         | 1.67476300  | -1.61368100 | -4.77899200 |
| H                                                                                         | 2.90864200  | -3.75313900 | -4.49952400 |
| C                                                                                         | 2.22873500  | -1.26932800 | 1.51985700  |
| C                                                                                         | 3.58190800  | -1.52661800 | 1.77782900  |
| C                                                                                         | 1.27391400  | -1.61286700 | 2.47959500  |
| C                                                                                         | 3.96561000  | -2.14291700 | 2.96240200  |
| H                                                                                         | 4.33907700  | -1.23452000 | 1.05090000  |
| C                                                                                         | 1.66122400  | -2.22126100 | 3.67119500  |
| H                                                                                         | 0.22144700  | -1.40987800 | 2.28487000  |
| C                                                                                         | 3.00454600  | -2.49111100 | 3.91014100  |
| H                                                                                         | 5.01715400  | -2.34482500 | 3.15097200  |
| H                                                                                         | 0.91029300  | -2.48190900 | 4.41288800  |
| H                                                                                         | 3.30688900  | -2.96759300 | 4.83961100  |
| C                                                                                         | -2.42021500 | 2.92000600  | -1.63090400 |
| H                                                                                         | -6.83229800 | -2.10857500 | 1.49343900  |
| C                                                                                         | -2.67855100 | 4.19400800  | -0.83071600 |
| H                                                                                         | -3.53428300 | 4.04814800  | -0.15881300 |
| H                                                                                         | -1.81218400 | 4.48395900  | -0.22872000 |
| H                                                                                         | -2.91886600 | 5.01873000  | -1.51133600 |
| C                                                                                         | -3.63274100 | 2.56195100  | -2.48751500 |
| H                                                                                         | -3.45416600 | 1.65694200  | -3.07815400 |
| H                                                                                         | -4.51349300 | 2.38953400  | -1.85556600 |
| H                                                                                         | -3.86451000 | 3.38507300  | -3.17302500 |
| H                                                                                         | -1.55445100 | 3.08165200  | -2.28656000 |
| <b>INT2 complex of (3-methylbut-1-yn-1-yl)benzene</b>                                     |             |             |             |
| Energy = -1183974.474439 kcal/mol                                                         |             |             |             |
| Electronic Energy + Thermal Free Energy Correction (353.150 K) = -1183670.635836 kcal/mol |             |             |             |
| Symmetry c1                                                                               |             |             |             |
| Pd                                                                                        | 0.58011400  | 0.07185300  | 0.12983700  |
| P                                                                                         | -1.85289500 | -0.23257300 | -0.11649000 |
| I                                                                                         | 0.95138100  | -2.51735500 | 0.63317700  |
| C                                                                                         | 1.14846900  | 2.33785400  | 0.41621900  |
| C                                                                                         | 0.79498100  | 2.27012400  | 1.78730200  |
| C                                                                                         | 0.32016000  | 3.09296200  | -0.46541200 |
| C                                                                                         | -0.32974000 | 2.91282300  | 2.28226700  |
| H                                                                                         | 1.46820800  | 1.73145900  | 2.45261500  |
| C                                                                                         | -0.80496800 | 3.74786700  | 0.05566600  |
| C                                                                                         | -1.11718500 | 3.66012400  | 1.40250400  |
| H                                                                                         | -0.57776800 | 2.85521200  | 3.33872500  |
| H                                                                                         | -1.44791400 | 4.31258800  | -0.61768300 |
| H                                                                                         | -1.99975100 | 4.17816400  | 1.77226400  |
| N                                                                                         | 0.65828600  | 3.22425200  | -1.79017800 |
| H                                                                                         | 1.26840500  | 2.51536300  | -2.17676600 |

|   |             |             |             |
|---|-------------|-------------|-------------|
| H | -0.07963200 | 3.51357000  | -2.41779600 |
| C | 2.58043100  | 0.50609100  | -0.00212700 |
| C | 2.50366600  | 1.83747300  | -0.01483700 |
| C | 3.69397300  | -0.40563300 | -0.21345500 |
| C | 3.86289300  | -1.07409800 | -1.43491900 |
| C | 4.62753800  | -0.62013000 | 0.80989400  |
| C | 4.95231000  | -1.91063700 | -1.63555300 |
| H | 3.12835400  | -0.92095700 | -2.22538500 |
| C | 5.71474600  | -1.46371600 | 0.60777900  |
| H | 4.49018500  | -0.11448100 | 1.76498700  |
| C | 5.88269700  | -2.10843900 | -0.61513100 |
| H | 5.08000200  | -2.41097400 | -2.59296300 |
| H | 6.43632200  | -1.61577000 | 1.40735400  |
| C | -2.88587700 | 1.22643700  | -0.54560400 |
| C | -3.84111500 | 1.79107000  | 0.29855500  |
| C | -2.65976700 | 1.80115200  | -1.80251700 |
| C | -4.55596800 | 2.91769300  | -0.10682000 |
| H | -4.03126000 | 1.35502100  | 1.27756400  |
| C | -3.37878600 | 2.91734300  | -2.20920800 |
| H | -1.91629000 | 1.36498400  | -2.47193500 |
| C | -4.32760200 | 3.48220700  | -1.35691100 |
| H | -5.29892300 | 3.34972600  | 0.55967700  |
| H | -3.19896300 | 3.35001400  | -3.19101800 |
| H | -4.89016800 | 4.35821300  | -1.67059300 |
| C | -2.59541500 | -0.91688700 | 1.40862800  |
| C | -3.25912100 | -2.14433400 | 1.46599800  |
| C | -2.37695300 | -0.20311700 | 2.59481600  |
| C | -3.71707600 | -2.63759300 | 2.68561300  |
| H | -3.41357900 | -2.72527000 | 0.55915800  |
| C | -2.84881500 | -0.69039600 | 3.80770600  |
| H | -1.82543400 | 0.73882800  | 2.56604300  |
| C | -3.51952100 | -1.91117900 | 3.85520500  |
| H | -4.22994800 | -3.59594400 | 2.71855100  |
| H | -2.68159700 | -0.12267900 | 4.71992300  |
| H | -3.88044700 | -2.29836100 | 4.80500800  |
| C | -2.34139800 | -1.35352800 | -1.48398800 |
| C | -3.69144800 | -1.61256400 | -1.75526200 |
| C | -1.36416600 | -1.87631600 | -2.33353900 |
| C | -4.05065100 | -2.40703100 | -2.83688300 |
| H | -4.46585100 | -1.18228100 | -1.12038800 |
| C | -1.72567900 | -2.66228400 | -3.42557600 |
| H | -0.31413200 | -1.66475200 | -2.13256800 |
| C | -3.06700100 | -2.93340700 | -3.67300100 |
| H | -5.10060800 | -2.60863800 | -3.03515000 |
| H | -0.95695200 | -3.06037800 | -4.08349800 |
| H | -3.35007500 | -3.54840900 | -4.52397400 |
| C | 3.57183600  | 2.87531600  | -0.30998600 |
| H | 6.73469400  | -2.76512800 | -0.77383400 |
| H | 3.03960800  | 3.75537600  | -0.70628000 |
| C | 4.24820000  | 3.29492800  | 0.99552700  |
| H | 4.94429100  | 4.12497200  | 0.82325300  |
| H | 3.51583100  | 3.62001200  | 1.74450900  |
| H | 4.81760900  | 2.45693800  | 1.41895300  |
| C | 4.59450900  | 2.44112800  | -1.35021500 |
| H | 5.21297700  | 1.61044300  | -0.98795800 |
| H | 4.10740300  | 2.11320900  | -2.27733800 |
| H | 5.26346600  | 3.27548400  | -1.59213700 |

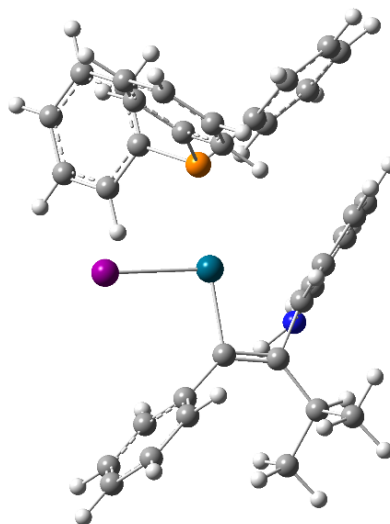

**ADS complex of (cyclohexylethynyl)benzene**

Energy = -1257156.182952 kcal/mol

Electronic Energy + Thermal Free Energy Correction (353.150 K) = -1256815.197071 kcal/mol

## Symmetry c1

|    |             |             |             |
|----|-------------|-------------|-------------|
| Pd | -0.45435100 | 0.03561400  | -0.11884600 |
| P  | 1.81148200  | -0.40876400 | 0.15669600  |
| I  | -0.65064500 | -1.37574400 | -2.54902900 |
| C  | -0.37574500 | 1.02047100  | 1.66581500  |
| C  | -0.12763600 | 2.38818400  | 1.67793100  |
| C  | -0.63413700 | 0.34241500  | 2.86779300  |
| C  | -0.15616200 | 3.11481500  | 2.87096300  |
| H  | 0.08961200  | 2.90759100  | 0.74232600  |
| C  | -0.68387200 | 1.08218900  | 4.05814500  |
| C  | -0.44313300 | 2.45078800  | 4.05970100  |
| H  | 0.03784800  | 4.18524200  | 2.86289600  |
| H  | -0.89551200 | 0.56054100  | 4.99213700  |
| H  | -0.47982300 | 2.99906600  | 4.99889900  |
| N  | -0.75216900 | -1.04944400 | 2.91507100  |
| H  | -1.04672300 | -1.47507100 | 2.04426500  |
| H  | -1.28031800 | -1.40437600 | 3.70295300  |
| C  | -2.45752900 | 1.32812700  | -0.60301100 |
| C  | -2.81434400 | 0.24413900  | -0.14711200 |
| C  | -2.08749100 | 2.62155700  | -1.08929300 |
| C  | -2.53710700 | 3.76940100  | -0.42007300 |
| C  | -1.24672900 | 2.75387700  | -2.20539500 |
| C  | -2.14203800 | 5.02695700  | -0.85727100 |
| H  | -3.18346300 | 3.66071600  | 0.44795000  |
| C  | -0.84854000 | 4.01484000  | -2.62784800 |
| H  | -0.89984400 | 1.85686400  | -2.71695200 |
| C  | -1.29350200 | 5.15189600  | -1.95523600 |
| H  | -2.49057700 | 5.91350700  | -0.33371500 |
| H  | -0.18746500 | 4.11019300  | -3.48603200 |
| C  | 2.75074400  | 0.49163700  | 1.44277300  |
| C  | 3.63763500  | 1.52285500  | 1.12786600  |
| C  | 2.53105000  | 0.15883100  | 2.78562900  |
| C  | 4.29307500  | 2.21722600  | 2.14285200  |
| H  | 3.82841500  | 1.78807900  | 0.09039300  |
| C  | 3.18672900  | 0.85422400  | 3.79252900  |
| H  | 1.83664300  | -0.64005100 | 3.04668300  |
| C  | 4.06577600  | 1.88816100  | 3.47383600  |
| H  | 4.98382000  | 3.01677900  | 1.88635700  |
| H  | 3.00197100  | 0.59424900  | 4.83235700  |
| H  | 4.57494000  | 2.43318800  | 4.26511100  |
| C  | 2.62884400  | 0.03844800  | -1.41254900 |
| C  | 3.49309100  | -0.82252800 | -2.08893100 |
| C  | 2.32186000  | 1.28643900  | -1.96769300 |
| C  | 4.04004400  | -0.43763800 | -3.31126200 |
| H  | 3.73009400  | -1.80032200 | -1.67412200 |
| C  | 2.87728100  | 1.67173700  | -3.18026700 |
| H  | 1.63025300  | 1.95420700  | -1.45135000 |
| C  | 3.73402000  | 0.80470300  | -3.85730500 |
| H  | 4.70640400  | -1.11567200 | -3.83875100 |
| H  | 2.63458600  | 2.64392400  | -3.60283000 |
| H  | 4.16122600  | 1.09908000  | -4.81275300 |
| C  | 2.20579300  | -2.15698300 | 0.49663600  |
| C  | 1.22146200  | -3.14193600 | 0.38378000  |
| C  | 3.50210300  | -2.51857300 | 0.88568400  |
| C  | 1.52974400  | -4.47265800 | 0.65112200  |
| H  | 0.21238100  | -2.86344600 | 0.07880200  |
| C  | 3.80752500  | -3.84934300 | 1.14532200  |
| H  | 4.27213300  | -1.75519400 | 0.99174400  |
| C  | 2.82098600  | -4.82622700 | 1.03019600  |

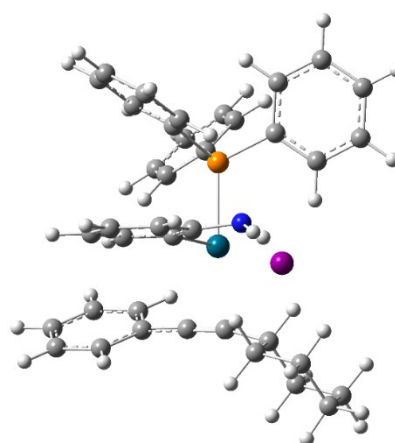



|                                                                                           |             |             |             |
|-------------------------------------------------------------------------------------------|-------------|-------------|-------------|
| H                                                                                         | 0.75760600  | -5.23293000 | 0.56424400  |
| H                                                                                         | 4.81635800  | -4.12309800 | 1.44373500  |
| H                                                                                         | 3.05994400  | -5.86569800 | 1.24151700  |
| H                                                                                         | -0.97794200 | 6.13762300  | -2.28807700 |
| C                                                                                         | -3.53005900 | -0.93798700 | 0.34590100  |
| C                                                                                         | -4.13027900 | -0.66992100 | 1.73395200  |
| C                                                                                         | -4.62145700 | -1.37532500 | -0.64077400 |
| H                                                                                         | -2.81565500 | -1.77562700 | 0.43233400  |
| C                                                                                         | -4.85040700 | -1.90930800 | 2.25016300  |
| H                                                                                         | -4.83964500 | 0.16822200  | 1.64666700  |
| H                                                                                         | -3.34145400 | -0.34958500 | 2.42772700  |
| C                                                                                         | -5.34540900 | -2.61028600 | -0.11702300 |
| H                                                                                         | -5.33286000 | -0.54370800 | -0.76568900 |
| H                                                                                         | -4.17212900 | -1.56620400 | -1.62400500 |
| C                                                                                         | -5.92625500 | -2.36830500 | 1.27199900  |
| H                                                                                         | -5.28579300 | -1.70642400 | 3.23642000  |
| H                                                                                         | -4.11263400 | -2.71640200 | 2.39345600  |
| H                                                                                         | -6.13371800 | -2.90774000 | -0.81944300 |
| H                                                                                         | -4.63276100 | -3.44961500 | -0.07193200 |
| H                                                                                         | -6.42019700 | -3.27484400 | 1.64346600  |
| H                                                                                         | -6.70401800 | -1.59069300 | 1.20548200  |
| <b>TS1 complex of (cyclohexylethynyl)benzene</b>                                          |             |             |             |
| Energy = -1257141.144699 kcal/mol                                                         |             |             |             |
| Electronic Energy + Thermal Free Energy Correction (353.150 K) = -1256798.788338 kcal/mol |             |             |             |
| Imaginary frequency = -277.11 cm <sup>-1</sup>                                            |             |             |             |
| Symmetry c1                                                                               |             |             |             |
| Pd                                                                                        | -0.35941000 | -0.26241300 | -0.12936300 |
| P                                                                                         | 2.04746100  | -0.07412900 | 0.07695200  |
| I                                                                                         | -0.19255100 | -2.97028100 | 0.31859600  |
| C                                                                                         | -0.49103800 | 1.72474100  | -0.74864400 |
| C                                                                                         | -0.64803800 | 1.94264000  | -2.11787900 |
| C                                                                                         | -0.04679800 | 2.76190000  | 0.09286800  |
| C                                                                                         | -0.32579000 | 3.17508200  | -2.68347800 |
| H                                                                                         | -1.04419800 | 1.14087500  | -2.74097200 |
| C                                                                                         | 0.26102900  | 4.00130200  | -0.48486900 |
| C                                                                                         | 0.12936700  | 4.19948200  | -1.85294200 |
| H                                                                                         | -0.44372000 | 3.33617200  | -3.75216900 |
| H                                                                                         | 0.62051500  | 4.80596600  | 0.15643200  |
| H                                                                                         | 0.37674000  | 5.17161700  | -2.27450100 |
| N                                                                                         | 0.12453700  | 2.54354700  | 1.44563200  |
| H                                                                                         | -0.41148500 | 1.77896800  | 1.83661600  |
| H                                                                                         | 0.14039900  | 3.36577500  | 2.03377000  |
| C                                                                                         | -2.41415600 | 0.90561600  | -0.09617200 |
| C                                                                                         | -2.46069500 | -0.33382400 | -0.35571400 |
| C                                                                                         | -3.04992300 | 2.08398300  | 0.45781100  |
| C                                                                                         | -3.19987500 | 3.27072000  | -0.27054000 |
| C                                                                                         | -3.59815300 | 1.98728800  | 1.74463700  |
| C                                                                                         | -3.90077200 | 4.33545100  | 0.27896100  |
| H                                                                                         | -2.76014000 | 3.34502100  | -1.26326600 |
| C                                                                                         | -4.29330400 | 3.05997500  | 2.29085200  |
| H                                                                                         | -3.46836200 | 1.06296700  | 2.30555800  |
| C                                                                                         | -4.44665900 | 4.23354800  | 1.55810300  |
| H                                                                                         | -4.02171200 | 5.25276800  | -0.29193000 |
| H                                                                                         | -4.71423100 | 2.97835000  | 3.28985500  |
| C                                                                                         | 2.91389000  | 1.48447100  | -0.38008800 |
| C                                                                                         | 3.27241800  | 1.74831100  | -1.70519100 |
| C                                                                                         | 3.17876300  | 2.45115900  | 0.59721400  |
| C                                                                                         | 3.87764200  | 2.95367600  | -2.04777700 |
| H                                                                                         | 3.08827200  | 1.00902700  | -2.48201000 |

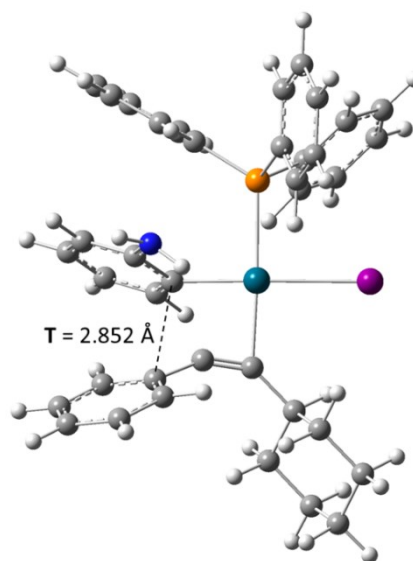

|                                                                                           |             |             |             |
|-------------------------------------------------------------------------------------------|-------------|-------------|-------------|
| C                                                                                         | 3.78985000  | 3.65110500  | 0.25386000  |
| H                                                                                         | 2.89226800  | 2.27075800  | 1.63055100  |
| C                                                                                         | 4.13816000  | 3.90769000  | -1.06966500 |
| H                                                                                         | 4.15173200  | 3.14175300  | -3.08328200 |
| H                                                                                         | 3.99248600  | 4.39077600  | 1.02522400  |
| H                                                                                         | 4.61630300  | 4.84741600  | -1.33627200 |
| C                                                                                         | 2.76651800  | -1.30395000 | -1.07975200 |
| C                                                                                         | 3.77688400  | -2.20225500 | -0.73388800 |
| C                                                                                         | 2.21322300  | -1.36490300 | -2.36550000 |
| C                                                                                         | 4.22838900  | -3.14115500 | -1.65886300 |
| H                                                                                         | 4.20279400  | -2.19211100 | 0.26680000  |
| C                                                                                         | 2.67592800  | -2.29057200 | -3.29257500 |
| H                                                                                         | 1.39491100  | -0.69465000 | -2.63371900 |
| C                                                                                         | 3.68325600  | -3.18534900 | -2.93791800 |
| H                                                                                         | 5.00933000  | -3.84222700 | -1.37404100 |
| H                                                                                         | 2.23936100  | -2.32396300 | -4.28782600 |
| H                                                                                         | 4.03905800  | -3.91909800 | -3.65714300 |
| C                                                                                         | 2.72768800  | -0.43851900 | 1.73422000  |
| C                                                                                         | 4.10040600  | -0.35558600 | 2.00368800  |
| C                                                                                         | 1.84906300  | -0.75988600 | 2.77178400  |
| C                                                                                         | 4.58223400  | -0.61605000 | 3.28121000  |
| H                                                                                         | 4.79718300  | -0.07556700 | 1.21481100  |
| C                                                                                         | 2.33213800  | -1.01311200 | 4.05303000  |
| H                                                                                         | 0.78009400  | -0.81312900 | 2.56644800  |
| C                                                                                         | 3.69827900  | -0.94620400 | 4.30655400  |
| H                                                                                         | 5.64952700  | -0.55414800 | 3.47873200  |
| H                                                                                         | 1.63841800  | -1.25936000 | 4.85312100  |
| H                                                                                         | 4.07678100  | -1.14363500 | 5.30662900  |
| H                                                                                         | -4.98971700 | 5.07328500  | 1.98493400  |
| C                                                                                         | -3.39902800 | -1.45987900 | -0.58123100 |
| C                                                                                         | -3.94103500 | -1.97295300 | 0.76015400  |
| C                                                                                         | -4.56047300 | -1.01470000 | -1.47962500 |
| H                                                                                         | -2.87318600 | -2.29261900 | -1.07384800 |
| C                                                                                         | -4.91098700 | -3.12640900 | 0.53804300  |
| H                                                                                         | -4.45799600 | -1.13944200 | 1.26455500  |
| H                                                                                         | -3.10558700 | -2.27512700 | 1.40516400  |
| C                                                                                         | -5.54107700 | -2.16147500 | -1.69756500 |
| H                                                                                         | -5.07370000 | -0.16933200 | -0.99109300 |
| H                                                                                         | -4.17273800 | -0.64094300 | -2.43654400 |
| C                                                                                         | -6.06099000 | -2.70810000 | -0.37223600 |
| H                                                                                         | -5.29167700 | -3.49089500 | 1.50051200  |
| H                                                                                         | -4.36598700 | -3.96688900 | 0.07684900  |
| H                                                                                         | -6.37254700 | -1.82933600 | -2.33203700 |
| H                                                                                         | -5.03091600 | -2.96903700 | -2.24663300 |
| H                                                                                         | -6.74201700 | -3.55081500 | -0.54621100 |
| H                                                                                         | -6.64985700 | -1.92573800 | 0.13307700  |
| <b>INT1 complex of (cyclohexylethynyl)benzene</b>                                         |             |             |             |
| Energy = -1257172.050144 kcal/mol                                                         |             |             |             |
| Electronic Energy + Thermal Free Energy Correction (353.150 K) = -1256829.396345 kcal/mol |             |             |             |
| Symmetry c1                                                                               |             |             |             |
| Pd                                                                                        | -0.33377300 | -0.16266000 | -0.13740200 |
| P                                                                                         | 2.15603100  | 0.13147000  | 0.02255200  |
| I                                                                                         | 0.06878800  | -2.76544300 | 0.31029700  |
| C                                                                                         | -1.31519300 | 1.89525500  | -0.40234800 |
| C                                                                                         | -0.76863800 | 1.90455600  | -1.71246800 |
| C                                                                                         | -0.81009500 | 2.82835200  | 0.55898000  |
| C                                                                                         | 0.24258600  | 2.78789900  | -2.07241200 |
| H                                                                                         | -1.22059300 | 1.24360000  | -2.45068200 |
| C                                                                                         | 0.17036700  | 3.74156800  | 0.15920700  |

|   |             |             |             |
|---|-------------|-------------|-------------|
| C | 0.68168300  | 3.71613000  | -1.13210800 |
| H | 0.65885800  | 2.77342300  | -3.07606900 |
| H | 0.54444400  | 4.46737000  | 0.87992500  |
| H | 1.45585500  | 4.43182200  | -1.40261500 |
| N | -1.27794900 | 2.80799100  | 1.84362900  |
| H | -2.15061100 | 2.33155000  | 2.02506600  |
| H | -1.10522100 | 3.61756000  | 2.42140000  |
| C | -2.59481500 | 1.14435200  | -0.15433100 |
| C | -2.40105900 | -0.18268500 | -0.18642200 |
| C | -3.84149100 | 1.92642400  | -0.00304000 |
| C | -3.95885200 | 3.16725800  | -0.64598100 |
| C | -4.90642200 | 1.49209900  | 0.79977100  |
| C | -5.11189500 | 3.93196000  | -0.51924900 |
| H | -3.13308300 | 3.52953200  | -1.25875100 |
| C | -6.06009800 | 2.25810100  | 0.92590800  |
| H | -4.81955900 | 0.55715000  | 1.35055200  |
| C | -6.17019900 | 3.47846400  | 0.26492600  |
| H | -5.18469700 | 4.88737500  | -1.03402500 |
| H | -6.87305700 | 1.90444500  | 1.55604900  |
| C | 3.07615200  | 1.69657200  | -0.29834500 |
| C | 3.69323100  | 1.97891400  | -1.51905400 |
| C | 3.13404700  | 2.65115100  | 0.72403300  |
| C | 4.36269300  | 3.18586000  | -1.70866700 |
| H | 3.66630500  | 1.25156300  | -2.32791900 |
| C | 3.80755200  | 3.85209400  | 0.53696200  |
| H | 2.64988100  | 2.45193500  | 1.68050500  |
| C | 4.42527400  | 4.12282700  | -0.68238200 |
| H | 4.84521200  | 3.38682000  | -2.66245900 |
| H | 3.84894200  | 4.57890900  | 1.34503100  |
| H | 4.95471900  | 5.06108400  | -0.83008200 |
| C | 2.87875400  | -1.02730500 | -1.19872300 |
| C | 3.82745500  | -2.00391800 | -0.89378100 |
| C | 2.36537800  | -0.95955500 | -2.50057600 |
| C | 4.25833100  | -2.89505500 | -1.87400200 |
| H | 4.21715500  | -2.09284400 | 0.11797700  |
| C | 2.80761300  | -1.83926600 | -3.48164200 |
| H | 1.59973500  | -0.21977800 | -2.74139800 |
| C | 3.75237700  | -2.81400300 | -3.16736400 |
| H | 4.99098500  | -3.65812200 | -1.62201400 |
| H | 2.40380800  | -1.77277700 | -4.48908300 |
| H | 4.09011700  | -3.51182700 | -3.92974700 |
| C | 2.84198300  | -0.29619300 | 1.66705100  |
| C | 4.22053600  | -0.29660600 | 1.91650900  |
| C | 1.96002300  | -0.52710100 | 2.72569800  |
| C | 4.70425000  | -0.56254400 | 3.19201900  |
| H | 4.92093800  | -0.07274300 | 1.11263700  |
| C | 2.44475900  | -0.77895000 | 4.00716200  |
| H | 0.88635400  | -0.51093200 | 2.53789300  |
| C | 3.81601800  | -0.80536000 | 4.23837900  |
| H | 5.77632400  | -0.56903500 | 3.37310600  |
| H | 1.74808200  | -0.95234500 | 4.82366900  |
| H | 4.19616700  | -1.00459100 | 5.23751600  |
| H | -7.07178700 | 4.07747000  | 0.36764800  |
| C | -3.44759700 | -1.24876900 | -0.22788300 |
| C | -3.29107100 | -2.19689200 | -1.42113100 |
| C | -3.61326500 | -2.02023000 | 1.08554500  |
| H | -4.40173000 | -0.70964100 | -0.39607100 |
| C | -4.44670500 | -3.18914300 | -1.48957000 |
| H | -2.33980400 | -2.73916000 | -1.32851800 |
| H | -3.22887600 | -1.60578900 | -2.34630900 |

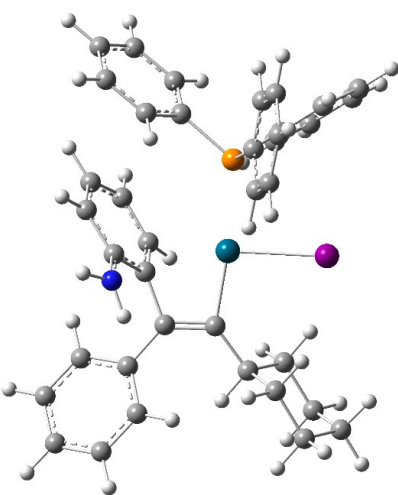

The image shows a 3D ball-and-stick model of a complex organic molecule. The structure features a central ring system, likely a benzene ring, with several substituents. Notable features include a nitrogen atom (blue), a sulfur atom (orange), a phosphorus atom (purple), and a chlorine atom (green). The molecule is shown in a perspective view, highlighting its three-dimensional structure.

|   |             |             |             |
|---|-------------|-------------|-------------|
| C | -4.77392900 | -3.00422300 | 0.99506700  |
| H | -2.68229500 | -2.56222300 | 1.30384100  |
| H | -3.76382400 | -1.31290600 | 1.91487800  |
| C | -4.58984400 | -3.95791800 | -0.18032100 |
| H | -4.30204400 | -3.88071500 | -2.32968400 |
| H | -5.38493100 | -2.64590100 | -1.68963400 |
| H | -4.87161500 | -3.56226100 | 1.93527800  |
| H | -5.71570700 | -2.44518000 | 0.86298100  |
| H | -5.42886400 | -4.66350600 | -0.23830400 |
| H | -3.68195900 | -4.56122200 | -0.01403400 |

**TS2 complex of (cyclohexylethynyl)benzene**

Energy = -1257140.600021 kcal/mol

Electronic Energy + Thermal Free Energy Correction (353.150 K) = -1256797.451117 kcal/mol

Imaginary frequency = -289.66 cm<sup>-1</sup>

Symmetry c1

|    |             |             |             |
|----|-------------|-------------|-------------|
| Pd | 0.27961800  | -0.30169000 | -0.01787500 |
| P  | -2.04880100 | 0.25450900  | 0.14185900  |
| I  | -0.31457000 | -2.94286000 | 0.48407800  |
| C  | 0.83105300  | 1.64654100  | -0.55535100 |
| C  | 0.59598900  | 2.73662600  | 0.29300400  |
| C  | 1.03411200  | 1.87417200  | -1.93477900 |
| C  | 0.63641800  | 4.04131100  | -0.17491700 |
| H  | 0.40270300  | 2.54826900  | 1.35026100  |
| C  | 1.06572900  | 3.20260400  | -2.39928200 |
| C  | 0.87931500  | 4.26676800  | -1.53268100 |
| H  | 0.45794300  | 4.87240200  | 0.50313700  |
| H  | 1.23586600  | 3.38049900  | -3.46083500 |
| H  | 0.90956200  | 5.28262300  | -1.92062700 |
| N  | 1.25669700  | 0.83183100  | -2.81746300 |
| H  | 0.79330400  | -0.03860000 | -2.59219000 |
| H  | 1.18169500  | 1.06888800  | -3.79775000 |
| C  | 2.39225700  | -0.68935400 | -0.23926400 |
| C  | 2.42571900  | 0.51157400  | 0.16362100  |
| C  | 3.00128600  | -1.94418900 | -0.60415800 |
| C  | 3.08713100  | -2.31721800 | -1.95252100 |
| C  | 3.51358800  | -2.80164400 | 0.37972700  |
| C  | 3.67891100  | -3.52278800 | -2.30796300 |
| H  | 2.68648000  | -1.64695800 | -2.71093500 |
| C  | 4.10196900  | -4.00664100 | 0.01643200  |
| H  | 3.43760900  | -2.51515100 | 1.42701900  |
| C  | 4.18364000  | -4.37236300 | -1.32573800 |
| H  | 3.74339900  | -3.80224300 | -3.35683500 |
| H  | 4.49793100  | -4.66532800 | 0.78573400  |
| C  | -2.51434400 | 2.02688500  | 0.09615900  |
| C  | -2.85004600 | 2.74834500  | 1.24325500  |
| C  | -2.47481500 | 2.68529800  | -1.13883000 |
| C  | -3.14262700 | 4.10721100  | 1.15663800  |
| H  | -2.89570300 | 2.25148100  | 2.21025900  |
| C  | -2.76682200 | 4.03983200  | -1.22217400 |
| H  | -2.21765600 | 2.13119200  | -2.04185600 |
| C  | -3.10077800 | 4.75469400  | -0.07338000 |
| H  | -3.41062400 | 4.65798800  | 2.05525000  |
| H  | -2.73110200 | 4.54052100  | -2.18714000 |
| H  | -3.33022900 | 5.81555500  | -0.13945600 |
| C  | -2.73083400 | -0.35947000 | 1.72294600  |
| C  | -3.89057100 | -1.12852100 | 1.82185100  |
| C  | -1.99196000 | -0.08113600 | 2.87980700  |
| C  | -4.31042500 | -1.60377200 | 3.06209500  |
| H  | -4.46299900 | -1.37503200 | 0.93016100  |

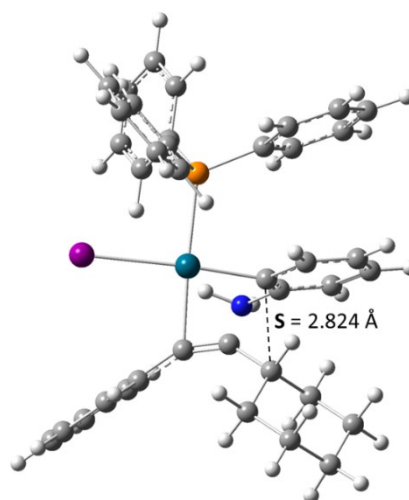

|                                                                                           |             |             |             |
|-------------------------------------------------------------------------------------------|-------------|-------------|-------------|
| C                                                                                         | -2.42079100 | -0.54243000 | 4.11797300  |
| H                                                                                         | -1.06492500 | 0.48979300  | 2.80403300  |
| C                                                                                         | -3.58089100 | -1.30919600 | 4.20944800  |
| H                                                                                         | -5.21126200 | -2.20907300 | 3.12822400  |
| H                                                                                         | -1.84308000 | -0.31448100 | 5.01035100  |
| H                                                                                         | -3.91271900 | -1.68136000 | 5.17568800  |
| C                                                                                         | -3.09094900 | -0.42457700 | -1.19925200 |
| C                                                                                         | -4.44638800 | -0.08189200 | -1.29760300 |
| C                                                                                         | -2.52487100 | -1.25294000 | -2.17058600 |
| C                                                                                         | -5.22379000 | -0.58539700 | -2.33344800 |
| H                                                                                         | -4.89266600 | 0.58823000  | -0.56350200 |
| C                                                                                         | -3.30286500 | -1.74820200 | -3.21438100 |
| H                                                                                         | -1.47070800 | -1.51821600 | -2.09997100 |
| C                                                                                         | -4.65216500 | -1.42040100 | -3.29198400 |
| H                                                                                         | -6.27611800 | -0.32004300 | -2.39720100 |
| H                                                                                         | -2.85177600 | -2.39080600 | -3.96640100 |
| H                                                                                         | -5.26058500 | -1.80886800 | -4.10511000 |
| H                                                                                         | 4.64132700  | -5.31807500 | -1.60558100 |
| C                                                                                         | 3.30052000  | 1.52793400  | 0.81005900  |
| C                                                                                         | 4.33621400  | 0.82729400  | 1.69698300  |
| C                                                                                         | 4.00441300  | 2.40220700  | -0.23387200 |
| H                                                                                         | 2.68589400  | 2.18145300  | 1.44783100  |
| C                                                                                         | 5.24468400  | 1.85094500  | 2.37085900  |
| H                                                                                         | 4.93873100  | 0.14928800  | 1.07029200  |
| H                                                                                         | 3.82702400  | 0.20255500  | 2.44268800  |
| C                                                                                         | 4.90606700  | 3.42709600  | 0.44247600  |
| H                                                                                         | 4.60617000  | 1.74250900  | -0.88120100 |
| H                                                                                         | 3.26650500  | 2.89560500  | -0.87612100 |
| C                                                                                         | 5.92885300  | 2.75006500  | 1.34723200  |
| H                                                                                         | 5.98761100  | 1.33796100  | 2.99442900  |
| H                                                                                         | 4.64029700  | 2.47243900  | 3.05110500  |
| H                                                                                         | 5.40677100  | 4.04499800  | -0.31343400 |
| H                                                                                         | 4.27907400  | 4.10957100  | 1.04052000  |
| H                                                                                         | 6.55393400  | 3.49762600  | 1.85189300  |
| H                                                                                         | 6.60560100  | 2.14003600  | 0.72736600  |
| <b>INT2 complex of (cyclohexylethynyl)benzene</b>                                         |             |             |             |
| Energy = -1257174.147907 kcal/mol                                                         |             |             |             |
| Electronic Energy + Thermal Free Energy Correction (353.150 K) = -1256831.280754 kcal/mol |             |             |             |
| Symmetry c1                                                                               |             |             |             |
| Pd                                                                                        | 0.23601200  | -0.25965200 | -0.06972500 |
| P                                                                                         | -2.19490600 | 0.25657600  | 0.07299100  |
| I                                                                                         | -0.31052500 | -2.86096600 | -0.05554700 |
| C                                                                                         | 1.54319500  | 1.66689200  | -0.09943800 |
| C                                                                                         | 1.06342300  | 2.10235700  | 1.16197400  |
| C                                                                                         | 1.06499600  | 2.32439500  | -1.27699300 |
| C                                                                                         | 0.17489800  | 3.15856100  | 1.28059100  |
| H                                                                                         | 1.44447600  | 1.59331100  | 2.04683200  |
| C                                                                                         | 0.17933500  | 3.40372100  | -1.13279000 |
| C                                                                                         | -0.24316500 | 3.81440500  | 0.12063400  |
| H                                                                                         | -0.18908800 | 3.47092600  | 2.25579200  |
| H                                                                                         | -0.18318400 | 3.91186700  | -2.02526900 |
| H                                                                                         | -0.94244000 | 4.64544200  | 0.19289300  |
| N                                                                                         | 1.52060000  | 1.95385900  | -2.51466900 |
| H                                                                                         | 1.93010500  | 1.03245000  | -2.59432300 |
| H                                                                                         | 0.97538700  | 2.24223000  | -3.31449000 |
| C                                                                                         | 2.27039400  | -0.56225800 | -0.14934100 |
| C                                                                                         | 2.69876000  | 0.69854400  | -0.16601400 |
| C                                                                                         | 3.05149600  | -1.79315000 | -0.20773600 |
| C                                                                                         | 3.52860300  | -2.25857600 | -1.44075000 |

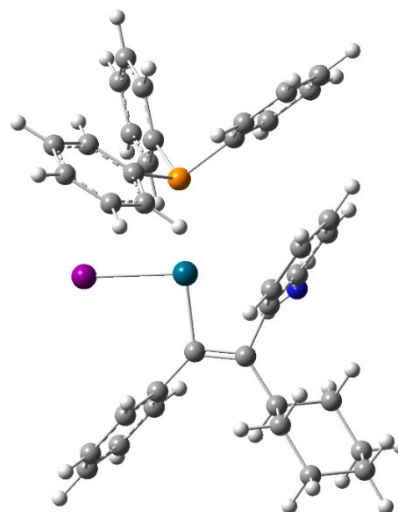

|   |             |             |             |
|---|-------------|-------------|-------------|
| C | 3.34779900  | -2.52535400 | 0.94973900  |
| C | 4.28091400  | -3.42564000 | -1.51397700 |
| H | 3.29638400  | -1.69216300 | -2.34249200 |
| C | 4.10285900  | -3.68955200 | 0.87487700  |
| H | 2.96727200  | -2.17423700 | 1.90842000  |
| C | 4.56904800  | -4.14614500 | -0.35690100 |
| H | 4.64601300  | -3.77391800 | -2.47776000 |
| H | 4.32907900  | -4.24545100 | 1.78219600  |
| C | -2.90671300 | 1.95339600  | 0.15067000  |
| C | -3.31698100 | 2.56155500  | 1.33850900  |
| C | -3.01622000 | 2.66710700  | -1.04897800 |
| C | -3.83311900 | 3.85569400  | 1.32462000  |
| H | -3.24592700 | 2.02501700  | 2.28276800  |
| C | -3.53940900 | 3.95372700  | -1.06369000 |
| H | -2.69122100 | 2.20806700  | -1.98323000 |
| C | -3.94884700 | 4.55285200  | 0.12627700  |
| H | -4.15539600 | 4.31446500  | 2.25653400  |
| H | -3.62501300 | 4.49098000  | -2.00547700 |
| H | -4.35948000 | 5.55965000  | 0.11746800  |
| C | -2.75557800 | -0.52155700 | 1.63332500  |
| C | -3.76906200 | -1.47773700 | 1.71279700  |
| C | -2.03713700 | -0.19367700 | 2.79153300  |
| C | -4.06823900 | -2.08503100 | 2.93034400  |
| H | -4.31724900 | -1.76973000 | 0.81971100  |
| C | -2.34725600 | -0.78928000 | 4.00843500  |
| H | -1.21885900 | 0.52658100  | 2.73555700  |
| C | -3.36360200 | -1.73984000 | 4.07896200  |
| H | -4.85573000 | -2.83339700 | 2.97826000  |
| H | -1.78627400 | -0.52029300 | 4.90023300  |
| H | -3.59965600 | -2.21570100 | 5.02767700  |
| C | -3.21308000 | -0.43762900 | -1.28321300 |
| C | -4.61128900 | -0.34858500 | -1.27545900 |
| C | -2.57257100 | -0.97614100 | -2.40175200 |
| C | -5.35163600 | -0.82651700 | -2.35016700 |
| H | -5.12357800 | 0.10928600  | -0.42967900 |
| C | -3.31444600 | -1.44408400 | -3.48395900 |
| H | -1.48456200 | -1.02809500 | -2.41997800 |
| C | -4.70323600 | -1.37742400 | -3.45437200 |
| H | -6.43665700 | -0.76029100 | -2.33110100 |
| H | -2.80476500 | -1.85885900 | -4.35023300 |
| H | -5.28399400 | -1.74436500 | -4.29728600 |
| H | 5.15647200  | -5.05952700 | -0.41362100 |
| C | 4.13052800  | 1.17742700  | -0.08824100 |
| C | 4.41184400  | 2.41419700  | -0.94362400 |
| C | 4.51001300  | 1.45713900  | 1.37444500  |
| H | 4.76976400  | 0.35149400  | -0.44652800 |
| C | 5.85899100  | 2.87521400  | -0.80799100 |
| H | 3.74025800  | 3.22844400  | -0.61996700 |
| H | 4.16778000  | 2.21088000  | -1.99370900 |
| C | 5.95764700  | 1.91545500  | 1.50566900  |
| H | 3.84399300  | 2.24447700  | 1.76687700  |
| H | 4.32535000  | 0.55779900  | 1.97922100  |
| C | 6.22236200  | 3.14593400  | 0.64671900  |
| H | 6.02826200  | 3.76899000  | -1.42221800 |
| H | 6.52504600  | 2.09215600  | -1.20541300 |
| H | 6.19642500  | 2.11722700  | 2.55794100  |
| H | 6.62384200  | 1.09906700  | 1.18305300  |
| H | 7.27145800  | 3.45752900  | 0.73113600  |
| H | 5.61328300  | 3.98483600  | 1.02093900  |

**ADS complex of (cyclopropylethynyl)benzene**

Energy = -1183181.552184 kcal/mol

Electronic Energy + Thermal Free Energy Correction (353.150 K) = -1182892.480123 kcal/mol

Symmetry c1

|    |             |             |             |
|----|-------------|-------------|-------------|
| Pd | 0.62600100  | -0.03177500 | -0.38726500 |
| P  | -1.63818700 | 0.00591400  | 0.30618000  |
| I  | 0.83152400  | -2.90443600 | -0.24208100 |
| C  | 0.60290300  | 1.99905300  | -0.51477300 |
| C  | 1.08404100  | 2.73551500  | 0.56804500  |
| C  | 0.22693300  | 2.66287900  | -1.70063500 |
| C  | 1.21741400  | 4.12938700  | 0.49716200  |
| H  | 1.37222900  | 2.22415500  | 1.48262500  |
| C  | 0.37752800  | 4.06124300  | -1.76885100 |
| C  | 0.86509700  | 4.78623400  | -0.68270900 |
| H  | 1.59449300  | 4.68440600  | 1.35152000  |
| H  | 0.09683700  | 4.57635700  | -2.68541000 |
| H  | 0.96794400  | 5.86504000  | -0.76265100 |
| N  | -0.36169900 | 1.97623200  | -2.77458200 |
| H  | -0.11926200 | 0.99485300  | -2.82456200 |
| H  | -0.25449600 | 2.42962800  | -3.67390900 |
| C  | 2.99468000  | 0.09010400  | -0.49424300 |
| C  | 2.73346500  | 0.05932800  | -1.69914500 |
| C  | 3.69955400  | 0.25492700  | 0.75195400  |
| C  | 4.80161400  | 1.13354000  | 0.79361100  |
| C  | 3.33108300  | -0.43973200 | 1.91909800  |
| C  | 5.51480600  | 1.30810400  | 1.97740400  |
| H  | 5.08799800  | 1.67112400  | -0.10450400 |
| C  | 4.05224500  | -0.25882500 | 3.09850400  |
| H  | 2.48879100  | -1.12188800 | 1.88625300  |
| C  | 5.14262300  | 0.61439100  | 3.13279100  |
| H  | 6.36166300  | 1.98736600  | 1.99785200  |
| H  | 3.76166200  | -0.80226400 | 3.99255800  |
| C  | -2.42910100 | 1.61265400  | 0.75846700  |
| C  | -2.70759600 | 1.95593500  | 2.08912600  |
| C  | -2.76168500 | 2.51726000  | -0.26511000 |
| C  | -3.30983600 | 3.18078200  | 2.39105600  |
| H  | -2.46642700 | 1.27225100  | 2.89491200  |
| C  | -3.36635800 | 3.73523500  | 0.04158400  |
| H  | -2.54257800 | 2.27367300  | -1.30007900 |
| C  | -3.64211600 | 4.07133000  | 1.37034500  |
| H  | -3.52286700 | 3.43074800  | 3.42618800  |
| H  | -3.62068500 | 4.42367400  | -0.75898000 |
| H  | -4.11345500 | 5.02089100  | 1.60611700  |
| C  | -1.81004000 | -1.01368400 | 1.83083100  |
| C  | -2.86265800 | -1.91967200 | 2.01996900  |
| C  | -0.85139300 | -0.85569800 | 2.84606000  |
| C  | -2.95575400 | -2.65162200 | 3.20650100  |
| H  | -3.60779000 | -2.06520000 | 1.24594700  |
| C  | -0.95484800 | -1.57858900 | 4.03427600  |
| H  | -0.01731100 | -0.17420000 | 2.70506400  |
| C  | -2.00674400 | -2.48097900 | 4.21583500  |
| H  | -3.77247100 | -3.35499100 | 3.33854100  |
| H  | -0.21004500 | -1.44357400 | 4.81278800  |
| H  | -2.08289700 | -3.05008300 | 5.13747000  |
| C  | -2.80688100 | -0.67986700 | -0.94098700 |
| C  | -2.32265800 | -1.39000200 | -2.04950100 |
| C  | -4.19386000 | -0.48959800 | -0.80403500 |
| C  | -3.20696000 | -1.90892700 | -2.99789500 |
| H  | -1.25539200 | -1.54302500 | -2.16560000 |

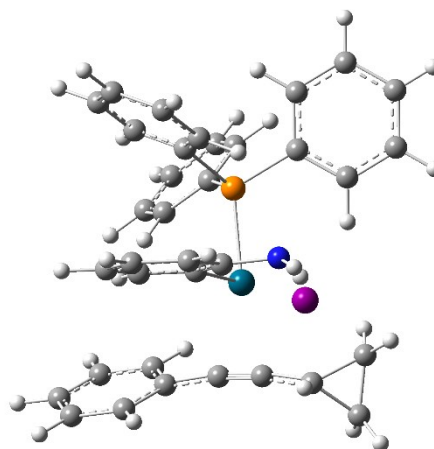

|   |             |             |             |
|---|-------------|-------------|-------------|
| C | -5.07417900 | -1.01486900 | -1.75032600 |
| H | -4.58871100 | 0.07498000  | 0.03420300  |
| C | -4.58264000 | -1.72468800 | -2.84903900 |
| H | -2.81793500 | -2.45367700 | -3.85288700 |
| H | -6.14273100 | -0.86327600 | -1.63139200 |
| H | -5.26939700 | -2.12704100 | -3.58774400 |
| H | 5.69985500  | 0.75388000  | 4.05423100  |
| C | 2.59465900  | 0.01824600  | -3.12918100 |
| C | 3.60474400  | -0.79144800 | -3.94493200 |
| C | 2.18970800  | -1.26425000 | -3.84687000 |
| H | 2.25611900  | 0.94768500  | -3.57905700 |
| H | 4.36429500  | -1.33278000 | -3.39108100 |
| H | 3.94510900  | -0.33713200 | -4.86973000 |
| H | 1.54121800  | -1.14409000 | -4.70882700 |
| H | 1.97741200  | -2.12520500 | -3.22231800 |

### TS1 complex of (cyclopropylethynyl)benzene

Energy = -1183166.107932 kcal/mol

Electronic Energy + Thermal Free Energy Correction (353.150 K) = -1182876.525079 kcal/mol

Imaginary frequency = -283.83  $\text{cm}^{-1}$

Symmetry c1

|    |             |             |             |
|----|-------------|-------------|-------------|
| Pd | -0.43086800 | -0.67746500 | -0.26743000 |
| P  | 1.62234300  | 0.53053200  | 0.14818500  |
| I  | 0.87617300  | -3.06994500 | 0.06354100  |
| C  | -1.41284900 | 1.08964900  | -0.77632000 |
| C  | -1.59243100 | 1.32588300  | -2.13979600 |
| C  | -1.51551300 | 2.14528400  | 0.15001100  |
| C  | -1.83424800 | 2.61393200  | -2.61359400 |
| H  | -1.55666800 | 0.48625300  | -2.83345400 |
| C  | -1.77225100 | 3.43474500  | -0.33770100 |
| C  | -1.92266700 | 3.66332300  | -1.69865800 |
| H  | -1.96705100 | 2.79105600  | -3.67798200 |
| H  | -1.83820400 | 4.25986100  | 0.37130500  |
| H  | -2.12046800 | 4.67451700  | -2.04824400 |
| N  | -1.31861900 | 1.92371200  | 1.49769700  |
| H  | -1.47134800 | 0.97628400  | 1.81994600  |
| H  | -1.68324500 | 2.62687400  | 2.12581400  |
| C  | -2.76931400 | -0.55577500 | -0.32117800 |
| C  | -2.25976200 | -1.65674700 | -0.69266400 |
| C  | -3.89830900 | 0.15092600  | 0.25245700  |
| C  | -4.52894000 | 1.21701400  | -0.40128900 |
| C  | -4.41730100 | -0.31743100 | 1.46819400  |
| C  | -5.66464000 | 1.79408100  | 0.14947800  |
| H  | -4.11731200 | 1.58332900  | -1.33991100 |
| C  | -5.55403200 | 0.26733500  | 2.01512100  |
| H  | -3.91708500 | -1.14103700 | 1.97558300  |
| C  | -6.17815000 | 1.32319200  | 1.35724200  |
| H  | -6.15476600 | 2.61655600  | -0.36576200 |
| H  | -5.94968500 | -0.10133600 | 2.95829500  |
| C  | 1.72879300  | 2.34221700  | -0.15494100 |
| C  | 1.96923100  | 2.84512400  | -1.43709300 |
| C  | 1.51796000  | 3.24329900  | 0.89511100  |
| C  | 1.99470000  | 4.21753300  | -1.66521200 |
| H  | 2.14868000  | 2.16694400  | -2.26883600 |
| C  | 1.55104500  | 4.61365700  | 0.66640700  |
| H  | 1.31963500  | 2.87170800  | 1.89733200  |
| C  | 1.78760900  | 5.10530100  | -0.61469400 |
| H  | 2.18666400  | 4.59159900  | -2.66820000 |

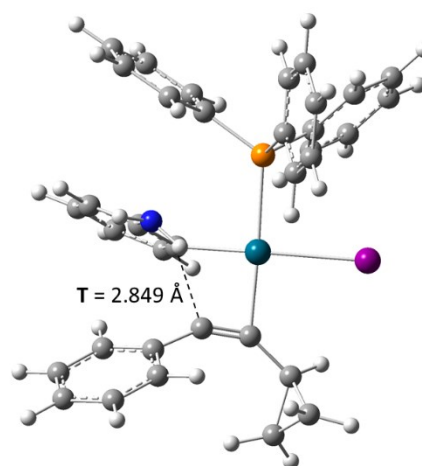



|                                                                                           |             |             |             |
|-------------------------------------------------------------------------------------------|-------------|-------------|-------------|
| H                                                                                         | 1.39219200  | 5.30092100  | 1.49430100  |
| H                                                                                         | 1.81395300  | 6.17788700  | -0.79214600 |
| C                                                                                         | 2.87260200  | -0.15372500 | -1.00816700 |
| C                                                                                         | 4.16781900  | -0.51086700 | -0.63162800 |
| C                                                                                         | 2.46809300  | -0.36191600 | -2.33350900 |
| C                                                                                         | 5.04548500  | -1.05589800 | -1.56619800 |
| H                                                                                         | 4.49765600  | -0.38351300 | 0.39705100  |
| C                                                                                         | 3.34909300  | -0.89175800 | -3.26808100 |
| H                                                                                         | 1.44561500  | -0.12216100 | -2.63046800 |
| C                                                                                         | 4.64159000  | -1.24284600 | -2.88428500 |
| H                                                                                         | 6.05010600  | -1.33661100 | -1.25876200 |
| H                                                                                         | 3.02218600  | -1.04297700 | -4.29401100 |
| H                                                                                         | 5.33027200  | -1.66737400 | -3.61072000 |
| C                                                                                         | 2.30291700  | 0.35827300  | 1.83566600  |
| C                                                                                         | 3.47748700  | 1.01023600  | 2.23500400  |
| C                                                                                         | 1.60140100  | -0.41101900 | 2.76687800  |
| C                                                                                         | 3.95069000  | 0.86936200  | 3.53435700  |
| H                                                                                         | 4.02001000  | 1.64056400  | 1.53159500  |
| C                                                                                         | 2.07319000  | -0.54719400 | 4.06959600  |
| H                                                                                         | 0.68305200  | -0.90909500 | 2.45679100  |
| C                                                                                         | 3.24971400  | 0.08880400  | 4.45181800  |
| H                                                                                         | 4.86499500  | 1.37582700  | 3.83357500  |
| H                                                                                         | 1.51814700  | -1.14818800 | 4.78562200  |
| H                                                                                         | 3.62012100  | -0.01660200 | 5.46870500  |
| H                                                                                         | -7.06589400 | 1.78198400  | 1.78594600  |
| C                                                                                         | -2.52568500 | -3.03731800 | -1.06080000 |
| C                                                                                         | -3.10031500 | -3.94663200 | -0.00316100 |
| C                                                                                         | -3.96809800 | -3.48046300 | -1.12273400 |
| H                                                                                         | -1.82873100 | -3.49805300 | -1.75661900 |
| H                                                                                         | -3.25907200 | -3.51172600 | 0.98167100  |
| H                                                                                         | -2.75520900 | -4.97738600 | 0.00040700  |
| H                                                                                         | -4.23630500 | -4.18775400 | -1.90263600 |
| H                                                                                         | -4.72382900 | -2.72933200 | -0.90252700 |
| <b>INT1 complex of (cyclopropylethynyl)benzene</b>                                        |             |             |             |
| Energy = -1183199.731747 kcal/mol                                                         |             |             |             |
| Electronic Energy + Thermal Free Energy Correction (353.150 K) = -1182909.564055 kcal/mol |             |             |             |
| Symmetry c1                                                                               |             |             |             |
| Pd                                                                                        | -0.46179200 | -0.48554900 | -0.11438200 |
| P                                                                                         | 1.88429700  | 0.37091600  | 0.00458600  |
| I                                                                                         | 0.41230000  | -2.93858100 | 0.42839100  |
| C                                                                                         | -1.97790800 | 1.23104700  | -0.40286400 |
| C                                                                                         | -1.45056600 | 1.33627400  | -1.71539800 |
| C                                                                                         | -1.70407800 | 2.27724500  | 0.53346400  |
| C                                                                                         | -0.68052400 | 2.42782500  | -2.10500900 |
| H                                                                                         | -1.73290300 | 0.56936800  | -2.43530100 |
| C                                                                                         | -0.96024500 | 3.38181200  | 0.10811600  |
| C                                                                                         | -0.46548700 | 3.45250600  | -1.18894900 |
| H                                                                                         | -0.27909300 | 2.48887500  | -3.11300200 |
| H                                                                                         | -0.75909400 | 4.18773200  | 0.81259900  |
| H                                                                                         | 0.11350300  | 4.32628200  | -1.48200800 |
| N                                                                                         | -2.14802600 | 2.17566700  | 1.82578800  |
| H                                                                                         | -2.89909900 | 1.52688000  | 2.01681900  |
| H                                                                                         | -2.17421300 | 3.02139100  | 2.37668100  |
| C                                                                                         | -3.00070500 | 0.16632900  | -0.11081700 |
| C                                                                                         | -2.43506500 | -1.04843600 | -0.10894400 |
| C                                                                                         | -4.40979700 | 0.56300900  | 0.08099700  |
| C                                                                                         | -4.89344400 | 1.72244300  | -0.54044400 |
| C                                                                                         | -5.27915600 | -0.16788600 | 0.90304500  |
| C                                                                                         | -6.21323400 | 2.12369900  | -0.37070900 |

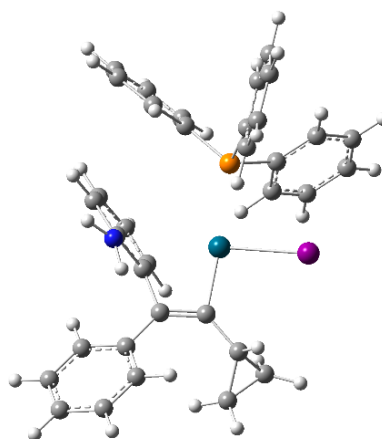

|                                                                                           |             |             |             |
|-------------------------------------------------------------------------------------------|-------------|-------------|-------------|
| H                                                                                         | -4.22529200 | 2.30989600  | -1.17033700 |
| C                                                                                         | -6.59848600 | 0.23567800  | 1.07293100  |
| H                                                                                         | -4.90927500 | -1.05108800 | 1.41961300  |
| C                                                                                         | -7.07192300 | 1.37989600  | 0.43498800  |
| H                                                                                         | -6.57251700 | 3.02163800  | -0.86837900 |
| H                                                                                         | -7.25841600 | -0.34198800 | 1.71626900  |
| C                                                                                         | 2.40385000  | 2.09204000  | -0.39896900 |
| C                                                                                         | 2.89162100  | 2.46481800  | -1.65341600 |
| C                                                                                         | 2.25093500  | 3.07535000  | 0.58573000  |
| C                                                                                         | 3.22767200  | 3.79132600  | -1.91385500 |
| H                                                                                         | 3.02273600  | 1.71860200  | -2.43462700 |
| C                                                                                         | 2.59390200  | 4.39712100  | 0.32820600  |
| H                                                                                         | 1.86402700  | 2.80249100  | 1.56773800  |
| C                                                                                         | 3.08301800  | 4.75958800  | -0.92492000 |
| H                                                                                         | 3.61303600  | 4.06471100  | -2.89345000 |
| H                                                                                         | 2.47564600  | 5.14667500  | 1.10750000  |
| H                                                                                         | 3.35256100  | 5.79319300  | -1.12856500 |
| C                                                                                         | 2.86347200  | -0.65536800 | -1.15510700 |
| C                                                                                         | 3.99137200  | -1.39348300 | -0.79402600 |
| C                                                                                         | 2.37046500  | -0.76296000 | -2.46246800 |
| C                                                                                         | 4.62117300  | -2.21511300 | -1.72625400 |
| H                                                                                         | 4.37367000  | -1.34967300 | 0.22350800  |
| C                                                                                         | 3.00724600  | -1.57262800 | -3.39529200 |
| H                                                                                         | 1.46771000  | -0.21822200 | -2.74589000 |
| C                                                                                         | 4.13465800  | -2.30395200 | -3.02641900 |
| H                                                                                         | 5.49515200  | -2.79099200 | -1.43093300 |
| H                                                                                         | 2.61537300  | -1.64371600 | -4.40709000 |
| H                                                                                         | 4.62768200  | -2.94761500 | -3.75084200 |
| C                                                                                         | 2.63428600  | 0.19116500  | 1.66596900  |
| C                                                                                         | 3.97706000  | 0.50499700  | 1.91492100  |
| C                                                                                         | 1.81150800  | -0.16817900 | 2.73617200  |
| C                                                                                         | 4.49143700  | 0.42127900  | 3.20307100  |
| H                                                                                         | 4.62066900  | 0.83035300  | 1.09812700  |
| C                                                                                         | 2.32382300  | -0.23903600 | 4.02945200  |
| H                                                                                         | 0.76079200  | -0.39076300 | 2.54928000  |
| C                                                                                         | 3.66501800  | 0.04698700  | 4.26148500  |
| H                                                                                         | 5.53695300  | 0.65844800  | 3.38459100  |
| H                                                                                         | 1.67277500  | -0.51580800 | 4.85508700  |
| H                                                                                         | 4.06778000  | -0.01154800 | 5.26985900  |
| H                                                                                         | -8.10355200 | 1.69513500  | 0.57214400  |
| C                                                                                         | -3.02433800 | -2.39230100 | -0.10108300 |
| C                                                                                         | -4.29253100 | -2.66061900 | -0.87510900 |
| C                                                                                         | -2.99101400 | -3.20758100 | -1.36463500 |
| H                                                                                         | -2.88341100 | -2.96261000 | 0.81810600  |
| H                                                                                         | -4.73287000 | -1.82774400 | -1.41843000 |
| H                                                                                         | -5.01411400 | -3.34548400 | -0.43544200 |
| H                                                                                         | -2.79967300 | -4.27415600 | -1.27467600 |
| H                                                                                         | -2.53835500 | -2.73297600 | -2.23457900 |
| <b>TS2 complex of (cyclopropylethynyl)benzene</b>                                         |             |             |             |
| Energy = -1183165.754645 kcal/mol                                                         |             |             |             |
| Electronic Energy + Thermal Free Energy Correction (353.150 K) = -1182876.941117 kcal/mol |             |             |             |
| Imaginary frequency = -327.77 cm <sup>-1</sup>                                            |             |             |             |
| Symmetry c1                                                                               |             |             |             |
| Pd                                                                                        | -0.60671000 | 0.19748500  | -0.02697900 |
| P                                                                                         | 1.68623400  | -0.47665900 | -0.04383400 |
| I                                                                                         | -1.39113400 | -2.43075700 | -0.27192200 |
| C                                                                                         | -0.10897000 | 2.21584900  | 0.21944100  |
| C                                                                                         | 0.59398200  | 2.90983600  | -0.77469400 |

|   |             |             |             |
|---|-------------|-------------|-------------|
| C | -0.19513400 | 2.76141900  | 1.51914300  |
| C | 1.14803600  | 4.15707000  | -0.53193500 |
| H | 0.66935400  | 2.47020900  | -1.77007200 |
| C | 0.35557500  | 4.03570100  | 1.74953900  |
| C | 1.00874900  | 4.72222900  | 0.73907400  |
| H | 1.68119200  | 4.68498000  | -1.31893400 |
| H | 0.27018200  | 4.47224700  | 2.74446700  |
| H | 1.42770500  | 5.70455000  | 0.94712600  |
| N | -0.85356100 | 2.09742100  | 2.53704800  |
| H | -0.84158000 | 1.08760000  | 2.48447200  |
| H | -0.69020900 | 2.44713400  | 3.47137800  |
| C | -2.61644000 | 0.93102500  | 0.02996100  |
| C | -2.12304600 | 2.01248900  | -0.40468800 |
| C | -3.80255100 | 0.17648300  | 0.36756100  |
| C | -4.12900400 | -0.07726800 | 1.70498300  |
| C | -4.62940300 | -0.31636300 | -0.65034300 |
| C | -5.27011500 | -0.80610100 | 2.01707000  |
| H | -3.47433200 | 0.29952300  | 2.48919700  |
| C | -5.76817100 | -1.04576900 | -0.33043500 |
| H | -4.35652100 | -0.13810200 | -1.68967600 |
| C | -6.09084800 | -1.29423600 | 1.00188400  |
| H | -5.51864100 | -0.99781300 | 3.05826600  |
| H | -6.40509200 | -1.42536200 | -1.12590600 |
| C | 2.95471000  | 0.84021900  | -0.14540000 |
| C | 3.67786900  | 1.10984300  | -1.30847900 |
| C | 3.15659900  | 1.63793900  | 0.98718500  |
| C | 4.59200600  | 2.16073600  | -1.33632600 |
| H | 3.53701600  | 0.49619400  | -2.19628100 |
| C | 4.06730800  | 2.68438500  | 0.95641900  |
| H | 2.59354500  | 1.43799500  | 1.89933400  |
| C | 4.78782600  | 2.94853700  | -0.20726300 |
| H | 5.15607000  | 2.35860900  | -2.24483700 |
| H | 4.21395200  | 3.29839400  | 1.84206700  |
| H | 5.50210400  | 3.76812100  | -0.23148700 |
| C | 2.02703900  | -1.55919200 | -1.47521700 |
| C | 2.66515000  | -2.79599400 | -1.37366700 |
| C | 1.55461300  | -1.13184400 | -2.72244400 |
| C | 2.83192900  | -3.59152800 | -2.50495100 |
| H | 3.01725600  | -3.15373000 | -0.40828400 |
| C | 1.73684600  | -1.91921500 | -3.85244300 |
| H | 1.02345100  | -0.18200800 | -2.80416800 |
| C | 2.37264300  | -3.15471000 | -3.74321700 |
| H | 3.32110100  | -4.55844200 | -2.41423400 |
| H | 1.36957600  | -1.57535900 | -4.81627600 |
| H | 2.50422300  | -3.77851900 | -4.62387500 |
| C | 2.21730900  | -1.37634900 | 1.45733100  |
| C | 3.56498100  | -1.70462000 | 1.65741900  |
| C | 1.28507200  | -1.68620200 | 2.45027900  |
| C | 3.96318700  | -2.35425700 | 2.81926900  |
| H | 4.30734600  | -1.44391500 | 0.90372900  |
| C | 1.68746200  | -2.32844000 | 3.61877800  |
| H | 0.23697200  | -1.42935300 | 2.29846600  |
| C | 3.02437100  | -2.66578400 | 3.80138200  |
| H | 5.00992300  | -2.61017500 | 2.96372100  |
| H | 0.95395900  | -2.56167200 | 4.38656300  |
| H | 3.33916100  | -3.16774700 | 4.71312800  |
| H | -6.97991600 | -1.86914900 | 1.24926100  |
| C | -2.28109600 | 3.23479200  | -1.16556100 |
| C | -2.27839400 | 3.13071900  | -2.67074200 |
| C | -3.56163900 | 3.37601200  | -1.95420400 |

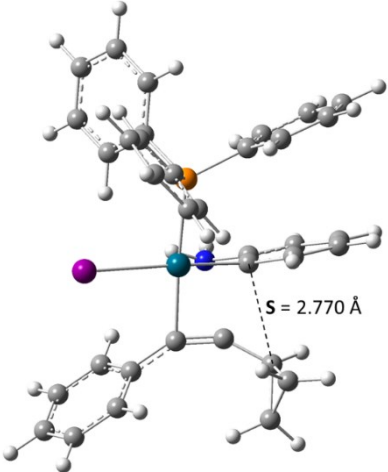

|                                                                                           |             |             |             |
|-------------------------------------------------------------------------------------------|-------------|-------------|-------------|
| H                                                                                         | -1.84868500 | 4.13499200  | -0.73319100 |
| H                                                                                         | -2.11228600 | 2.13831600  | -3.08665400 |
| H                                                                                         | -1.81870800 | 3.94790900  | -3.21984100 |
| H                                                                                         | -3.99750500 | 4.37028500  | -1.99167600 |
| H                                                                                         | -4.28114400 | 2.56353200  | -1.89298100 |
| <b>INT2 complex of (cyclopropylethynyl)benzene</b>                                        |             |             |             |
| Energy = -1183200.598964 kcal/mol                                                         |             |             |             |
| Electronic Energy + Thermal Free Energy Correction (353.150 K) = -1182910.096810 kcal/mol |             |             |             |
| Symmetry c1                                                                               |             |             |             |
| Pd                                                                                        | 0.62594400  | 0.10608800  | 0.01516500  |
| P                                                                                         | -1.83981600 | -0.20337400 | 0.00628100  |
| I                                                                                         | 0.96237000  | -2.52549900 | -0.03392300 |
| C                                                                                         | 1.24625000  | 2.35777900  | 0.15873000  |
| C                                                                                         | 0.60578000  | 2.48258600  | 1.41715800  |
| C                                                                                         | 0.63355300  | 2.95610800  | -0.98693700 |
| C                                                                                         | -0.58411600 | 3.17922200  | 1.56261700  |
| H                                                                                         | 1.10428400  | 2.04212400  | 2.28027900  |
| C                                                                                         | -0.56250300 | 3.66816900  | -0.81464500 |
| C                                                                                         | -1.14762400 | 3.78208500  | 0.43645800  |
| H                                                                                         | -1.06472400 | 3.25879400  | 2.53404800  |
| H                                                                                         | -1.03404400 | 4.12792900  | -1.68203400 |
| H                                                                                         | -2.08363900 | 4.32974700  | 0.53004100  |
| N                                                                                         | 1.24756400  | 2.89181700  | -2.20773600 |
| H                                                                                         | 1.96024400  | 2.18542900  | -2.33196900 |
| H                                                                                         | 0.68977000  | 3.08603600  | -3.02644600 |
| C                                                                                         | 2.64900800  | 0.47537900  | 0.02989700  |
| C                                                                                         | 2.64564100  | 1.80815100  | 0.07902600  |
| C                                                                                         | 3.79503800  | -0.42156700 | -0.07755800 |
| C                                                                                         | 4.41467400  | -0.61995600 | -1.31924800 |
| C                                                                                         | 4.31412600  | -1.07867400 | 1.04625400  |
| C                                                                                         | 5.52215900  | -1.45315300 | -1.43361900 |
| H                                                                                         | 4.01500000  | -0.10986300 | -2.19561900 |
| C                                                                                         | 5.42468200  | -1.90633800 | 0.93095400  |
| H                                                                                         | 3.83133000  | -0.93553200 | 2.01211500  |
| C                                                                                         | 6.03048000  | -2.09981700 | -0.30931800 |
| H                                                                                         | 5.99299200  | -1.59489900 | -2.40408300 |
| H                                                                                         | 5.82033800  | -2.40414200 | 1.81362400  |
| C                                                                                         | -3.06102300 | 1.17119200  | 0.10359000  |
| C                                                                                         | -3.73066800 | 1.52588000  | 1.27591800  |
| C                                                                                         | -3.30773100 | 1.90059400  | -1.06573200 |
| C                                                                                         | -4.63633900 | 2.58468800  | 1.27562200  |
| H                                                                                         | -3.55710200 | 0.97190000  | 2.19632400  |
| C                                                                                         | -4.21651400 | 2.95089600  | -1.06770800 |
| H                                                                                         | -2.78576900 | 1.63593500  | -1.98592600 |
| C                                                                                         | -4.88429000 | 3.29631900  | 0.10608800  |
| H                                                                                         | -5.15724800 | 2.84554500  | 2.19398700  |
| H                                                                                         | -4.40357300 | 3.50200400  | -1.98651900 |
| H                                                                                         | -5.59757400 | 4.11701700  | 0.10699500  |
| C                                                                                         | -2.20767600 | -1.22297600 | 1.48305600  |
| C                                                                                         | -2.85180200 | -2.46023100 | 1.43449300  |
| C                                                                                         | -1.71506100 | -0.75880800 | 2.71016000  |
| C                                                                                         | -3.01029300 | -3.21503200 | 2.59449000  |
| H                                                                                         | -3.21468000 | -2.85140900 | 0.48645200  |
| C                                                                                         | -1.88742700 | -1.50635700 | 3.86918600  |
| H                                                                                         | -1.17831300 | 0.19047500  | 2.75434600  |
| C                                                                                         | -2.53366200 | -2.73982700 | 3.81176300  |
| H                                                                                         | -3.50667500 | -4.18124300 | 2.54268200  |
| H                                                                                         | -1.50568200 | -1.13182600 | 4.81599100  |
| H                                                                                         | -2.65855100 | -3.33164800 | 4.71525700  |

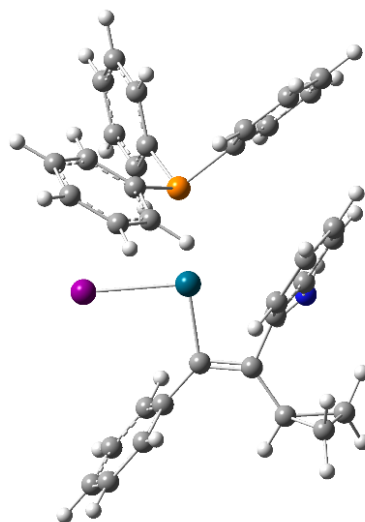

|                                                                                           |             |             |             |
|-------------------------------------------------------------------------------------------|-------------|-------------|-------------|
| C                                                                                         | -2.50451800 | -1.10426700 | -1.44382300 |
| C                                                                                         | -3.86236500 | -1.43729400 | -1.53874300 |
| C                                                                                         | -1.65746800 | -1.39099700 | -2.51655400 |
| C                                                                                         | -4.35155600 | -2.07559400 | -2.67209000 |
| H                                                                                         | -4.54295200 | -1.18754000 | -0.72520700 |
| C                                                                                         | -2.15126300 | -2.01886800 | -3.65815600 |
| H                                                                                         | -0.60329500 | -1.12312000 | -2.45113400 |
| C                                                                                         | -3.49550400 | -2.36782100 | -3.73258900 |
| H                                                                                         | -5.40497900 | -2.33799500 | -2.73219000 |
| H                                                                                         | -1.48337200 | -2.23366900 | -4.48876400 |
| H                                                                                         | -3.88157200 | -2.86079100 | -4.62164800 |
| H                                                                                         | 6.89680700  | -2.75105300 | -0.39810400 |
| C                                                                                         | 3.82919200  | 2.69943700  | 0.12863300  |
| C                                                                                         | 3.74765500  | 4.15152700  | -0.25503400 |
| C                                                                                         | 3.89858800  | 3.78207900  | 1.18111000  |
| H                                                                                         | 4.76670700  | 2.19079800  | -0.09319800 |
| H                                                                                         | 2.78399400  | 4.53916100  | -0.57873900 |
| H                                                                                         | 4.60119400  | 4.57646900  | -0.77664100 |
| H                                                                                         | 4.85418800  | 3.94475100  | 1.67219200  |
| H                                                                                         | 3.02764200  | 3.90283000  | 1.82346600  |
| <b>ADS complex of (3,3-dimethylbut-1-yn-1-yl)benzene</b>                                  |             |             |             |
| Energy = -1208607.084210 kcal/mol                                                         |             |             |             |
| Electronic Energy + Thermal Free Energy Correction (353.150 K) = -1208289.080219 kcal/mol |             |             |             |
| Symmetry c1                                                                               |             |             |             |
| Pd                                                                                        | 0.60257600  | -0.14996800 | -0.41943700 |
| P                                                                                         | -1.64331300 | 0.06693600  | 0.19727100  |
| I                                                                                         | 0.56500400  | -2.97543800 | -0.21526600 |
| C                                                                                         | 0.63351400  | 1.88447200  | -0.59473000 |
| C                                                                                         | 1.02583800  | 2.64761000  | 0.49868600  |
| C                                                                                         | 0.30894300  | 2.51293900  | -1.80717600 |
| C                                                                                         | 1.14154800  | 4.03663700  | 0.40504900  |
| H                                                                                         | 1.24610200  | 2.16013900  | 1.45004700  |
| C                                                                                         | 0.45414500  | 3.90514400  | -1.90237700 |
| C                                                                                         | 0.86149000  | 4.65769200  | -0.80821900 |
| H                                                                                         | 1.44882500  | 4.61793200  | 1.27178500  |
| H                                                                                         | 0.21611700  | 4.39347800  | -2.84788300 |
| H                                                                                         | 0.95498500  | 5.73729000  | -0.90662300 |
| N                                                                                         | -0.23419600 | 1.80392100  | -2.87987000 |
| H                                                                                         | -0.04634400 | 0.80905700  | -2.86932500 |
| H                                                                                         | -0.08217100 | 2.21325800  | -3.79309600 |
| C                                                                                         | 2.95717900  | -0.09393100 | -0.02175200 |
| C                                                                                         | 2.84049400  | -0.24864500 | -1.23793400 |
| C                                                                                         | 3.20761000  | 0.16215700  | 1.36403800  |
| C                                                                                         | 3.91835200  | 1.31782800  | 1.72410800  |
| C                                                                                         | 2.75192300  | -0.71053100 | 2.36419200  |
| C                                                                                         | 4.16388700  | 1.59478900  | 3.06229900  |
| H                                                                                         | 4.26270400  | 1.99316500  | 0.94395400  |
| C                                                                                         | 2.99637800  | -0.42023500 | 3.70007300  |
| H                                                                                         | 2.19781900  | -1.60346900 | 2.07758200  |
| C                                                                                         | 3.70028400  | 0.73018200  | 4.05152200  |
| H                                                                                         | 4.71533700  | 2.49094900  | 3.33492200  |
| H                                                                                         | 2.63791500  | -1.09774100 | 4.47150000  |
| C                                                                                         | -2.28549300 | 1.72523800  | 0.62599200  |
| C                                                                                         | -2.46883700 | 2.13125700  | 1.94929900  |
| C                                                                                         | -2.53432400 | 2.63112900  | -0.41237900 |
| C                                                                                         | -2.88501700 | 3.43081500  | 2.23072100  |
| H                                                                                         | -2.29093900 | 1.43702700  | 2.76762700  |
| C                                                                                         | -2.95308000 | 3.92358700  | -0.12646900 |
| H                                                                                         | -2.38435600 | 2.32727700  | -1.44841100 |

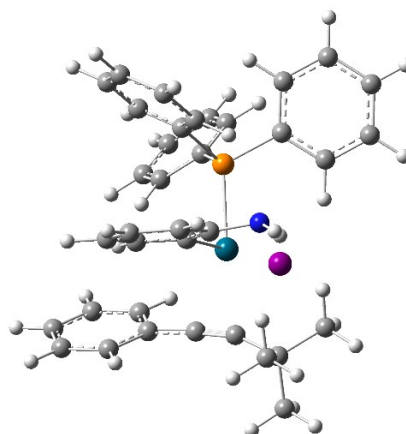

|                                                                                           |             |             |             |
|-------------------------------------------------------------------------------------------|-------------|-------------|-------------|
| C                                                                                         | -3.12272700 | 4.32848700  | 1.19627100  |
| H                                                                                         | -3.02551600 | 3.73709400  | 3.26451700  |
| H                                                                                         | -3.13615500 | 4.62193000  | -0.93980000 |
| H                                                                                         | -3.44403600 | 5.34331500  | 1.41837100  |
| C                                                                                         | -1.86696200 | -0.91745000 | 1.71905300  |
| C                                                                                         | -2.90199200 | -1.83998400 | 1.87285500  |
| C                                                                                         | -0.92200800 | -0.76405800 | 2.74048700  |
| C                                                                                         | -2.98548900 | -2.60513000 | 3.03389800  |
| H                                                                                         | -3.63626600 | -1.97977900 | 1.08204900  |
| C                                                                                         | -1.01280800 | -1.52185100 | 3.90054400  |
| H                                                                                         | -0.09540800 | -0.06265400 | 2.61439700  |
| C                                                                                         | -2.04269900 | -2.45027500 | 4.04507700  |
| H                                                                                         | -3.78888400 | -3.32936200 | 3.14386400  |
| H                                                                                         | -0.27262300 | -1.39610900 | 4.68748600  |
| H                                                                                         | -2.10744400 | -3.05389700 | 4.94702800  |
| C                                                                                         | -2.84992000 | -0.55407100 | -1.02099800 |
| C                                                                                         | -2.42606700 | -1.31398100 | -2.11372900 |
| C                                                                                         | -4.21445000 | -0.28079900 | -0.85874200 |
| C                                                                                         | -3.35402700 | -1.80123300 | -3.02963400 |
| H                                                                                         | -1.36561000 | -1.53150400 | -2.23947100 |
| C                                                                                         | -5.13867200 | -0.77562900 | -1.77084500 |
| H                                                                                         | -4.55283900 | 0.32231500  | -0.01702700 |
| C                                                                                         | -4.70873600 | -1.53482300 | -2.85712300 |
| H                                                                                         | -3.01639300 | -2.38899100 | -3.87950900 |
| H                                                                                         | -6.19640200 | -0.56393600 | -1.63606800 |
| H                                                                                         | -5.43295300 | -1.91652800 | -3.57267900 |
| C                                                                                         | 3.19879100  | -0.43178600 | -2.66447100 |
| H                                                                                         | 3.88909500  | 0.95273000  | 5.09884800  |
| C                                                                                         | 2.17118200  | -1.25102500 | -3.44393700 |
| H                                                                                         | 2.51925300  | -1.37050300 | -4.47729300 |
| H                                                                                         | 2.03163500  | -2.24437600 | -3.00326700 |
| H                                                                                         | 1.19387400  | -0.75389400 | -3.47358000 |
| C                                                                                         | 3.35645000  | 0.95049300  | -3.30884300 |
| H                                                                                         | 4.08796800  | 1.55821000  | -2.76356100 |
| H                                                                                         | 3.70650900  | 0.83235400  | -4.34204200 |
| H                                                                                         | 2.40112000  | 1.48906800  | -3.32827400 |
| C                                                                                         | 4.54419200  | -1.17220600 | -2.68130800 |
| H                                                                                         | 5.31423200  | -0.60360600 | -2.14751700 |
| H                                                                                         | 4.44902400  | -2.15711000 | -2.20833100 |
| H                                                                                         | 4.87380600  | -1.31475200 | -3.71798500 |
| <b>TS1 complex of (3,3-dimethylbut-1-yn-1-yl)benzene</b>                                  |             |             |             |
| Energy = -1208591.483709 kcal/mol                                                         |             |             |             |
| Electronic Energy + Thermal Free Energy Correction (353.150 K) = -1208271.724575 kcal/mol |             |             |             |
| Imaginary frequency = -291.63 cm <sup>-1</sup>                                            |             |             |             |
| Symmetry c1                                                                               |             |             |             |
| Pd                                                                                        | -0.44000400 | -0.62457100 | -0.10887900 |
| P                                                                                         | 1.68890300  | 0.53422000  | 0.09410900  |
| I                                                                                         | 0.84620400  | -2.98006200 | 0.56786000  |
| C                                                                                         | -1.35954100 | 1.13100100  | -0.75173700 |
| C                                                                                         | -1.61753600 | 1.23237300  | -2.12076700 |
| C                                                                                         | -1.31569200 | 2.28638000  | 0.05235200  |
| C                                                                                         | -1.78188000 | 2.47649300  | -2.72391400 |
| H                                                                                         | -1.70714600 | 0.32027000  | -2.71194800 |
| C                                                                                         | -1.50022900 | 3.53160300  | -0.56424000 |
| C                                                                                         | -1.71765700 | 3.62306400  | -1.93156800 |
| H                                                                                         | -1.97188700 | 2.54810600  | -3.79189600 |
| H                                                                                         | -1.45330100 | 4.43221900  | 0.04751000  |
| H                                                                                         | -1.85144200 | 4.60418900  | -2.38278000 |

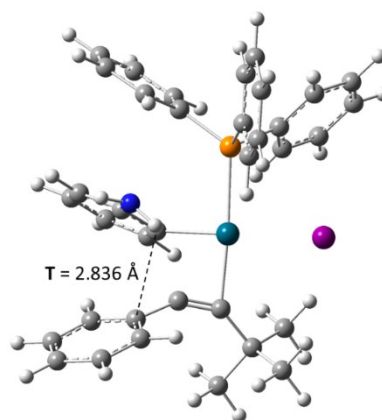

|   |             |             |             |
|---|-------------|-------------|-------------|
| N | -1.04227400 | 2.19613300  | 1.40261700  |
| H | -1.27244200 | 1.31356800  | 1.84175600  |
| H | -1.29570000 | 2.99867200  | 1.96302900  |
| C | -2.73489300 | -0.35381300 | -0.05842800 |
| C | -2.34697300 | -1.49733800 | -0.45001900 |
| C | -3.75955200 | 0.44118300  | 0.59193200  |
| C | -4.41650500 | 1.48428200  | -0.07255700 |
| C | -4.14496300 | 0.09684800  | 1.89424600  |
| C | -5.44907100 | 2.16412400  | 0.55874200  |
| H | -4.10730800 | 1.75008800  | -1.08209900 |
| C | -5.17279200 | 0.78968000  | 2.52430400  |
| H | -3.62656900 | -0.71592800 | 2.40087600  |
| C | -5.82519000 | 1.82272300  | 1.85725900  |
| H | -5.96350300 | 2.96775800  | 0.03747200  |
| H | -5.46331100 | 0.52194600  | 3.53712000  |
| C | 1.82634700  | 2.29345800  | -0.42792900 |
| C | 1.81482100  | 2.62335100  | -1.78606500 |
| C | 1.86702500  | 3.32451900  | 0.51742400  |
| C | 1.85261300  | 3.95294100  | -2.19176400 |
| H | 1.78115400  | 1.84047900  | -2.54107100 |
| C | 1.90468600  | 4.65339600  | 0.11000000  |
| H | 1.86549500  | 3.08833600  | 1.57896600  |
| C | 1.89832600  | 4.97140100  | -1.24533300 |
| H | 1.84743800  | 4.19153100  | -3.25291600 |
| H | 1.94342200  | 5.44319500  | 0.85684600  |
| H | 1.92956500  | 6.01123500  | -1.56228300 |
| C | 2.81405600  | -0.32613900 | -1.07651000 |
| C | 4.13195700  | -0.67709900 | -0.77993500 |
| C | 2.28067900  | -0.68404300 | -2.32202400 |
| C | 4.90496100  | -1.36126800 | -1.71540500 |
| H | 4.55946100  | -0.43963500 | 0.19137400  |
| C | 3.05686300  | -1.35383300 | -3.25987200 |
| H | 1.23657100  | -0.45868200 | -2.54776200 |
| C | 4.37282300  | -1.69601600 | -2.95604500 |
| H | 5.92791000  | -1.63543100 | -1.46842100 |
| H | 2.62941200  | -1.62187800 | -4.22304600 |
| H | 4.97900500  | -2.23022300 | -3.68361900 |
| C | 2.49583900  | 0.51875700  | 1.73456400  |
| C | 3.74207500  | 1.11880800  | 1.96220700  |
| C | 1.82076100  | -0.06991300 | 2.80701700  |
| C | 4.30978700  | 1.09962100  | 3.23105900  |
| H | 4.26695400  | 1.61727900  | 1.14851900  |
| C | 2.38687500  | -0.08289800 | 4.07865200  |
| H | 0.84634500  | -0.52640300 | 2.63752500  |
| C | 3.63443400  | 0.49553300  | 4.28931000  |
| H | 5.27961600  | 1.56303700  | 3.39474100  |
| H | 1.85128000  | -0.54539700 | 4.90402500  |
| H | 4.07949600  | 0.48414400  | 5.28134900  |
| C | -2.85261600 | -2.80078200 | -0.98457100 |
| H | -6.62935900 | 2.36429400  | 2.34953900  |
| C | -1.97548000 | -3.30861900 | -2.12861000 |
| H | -0.96220700 | -3.53373300 | -1.77750400 |
| H | -2.41159600 | -4.22141800 | -2.55454600 |
| H | -1.90427200 | -2.55794600 | -2.92705200 |
| C | -4.26550200 | -2.52332800 | -1.51691100 |
| H | -4.92096100 | -2.15602200 | -0.71712700 |
| H | -4.24118800 | -1.76943300 | -2.31439300 |
| H | -4.69925300 | -3.44602400 | -1.92320600 |
| C | -2.93134000 | -3.83411800 | 0.14094600  |
| H | -3.33647400 | -4.77550700 | -0.25276600 |

|                                                                                           |             |             |             |
|-------------------------------------------------------------------------------------------|-------------|-------------|-------------|
| H                                                                                         | -1.94235600 | -4.03097700 | 0.56902100  |
| H                                                                                         | -3.59421500 | -3.48239400 | 0.94184300  |
| <b>INT1 complex of (3,3-dimethylbut-1-yn-1-yl)benzene</b>                                 |             |             |             |
| Energy = -1208620.076784 kcal/mol                                                         |             |             |             |
| Electronic Energy + Thermal Free Energy Correction (353.150 K) = -1208299.914789 kcal/mol |             |             |             |
| Symmetry c1                                                                               |             |             |             |
| Pd                                                                                        | 0.30899000  | -0.40208100 | 0.37443000  |
| P                                                                                         | -2.06282500 | 0.29091200  | 0.18178900  |
| I                                                                                         | 0.04376000  | -2.52422900 | -1.26397900 |
| C                                                                                         | 1.87659200  | 1.37707000  | -0.02429700 |
| C                                                                                         | 1.18221400  | 1.93125600  | 1.07773800  |
| C                                                                                         | 1.69868300  | 1.95860100  | -1.31404500 |
| C                                                                                         | 0.34756400  | 3.04550000  | 0.92778000  |
| H                                                                                         | 1.41530200  | 1.53855500  | 2.06898900  |
| C                                                                                         | 0.87282200  | 3.07538700  | -1.43749500 |
| C                                                                                         | 0.21186800  | 3.60986700  | -0.33137500 |
| H                                                                                         | -0.16395500 | 3.46728300  | 1.78885200  |
| H                                                                                         | 0.74267900  | 3.52955000  | -2.41875400 |
| H                                                                                         | -0.41880800 | 4.48520600  | -0.46980500 |
| N                                                                                         | 2.29448600  | 1.38224300  | -2.41328000 |
| H                                                                                         | 3.11125900  | 0.81088100  | -2.24139900 |
| H                                                                                         | 2.37520000  | 1.96211100  | -3.23689000 |
| C                                                                                         | 2.88417000  | 0.29749200  | 0.23775200  |
| C                                                                                         | 2.28868000  | -0.82799600 | 0.65963000  |
| C                                                                                         | 4.32061800  | 0.64596800  | 0.13563400  |
| C                                                                                         | 4.79910700  | 1.80798500  | 0.75340200  |
| C                                                                                         | 5.21398000  | -0.13831000 | -0.60427900 |
| C                                                                                         | 6.14218900  | 2.15501000  | 0.66613100  |
| H                                                                                         | 4.10821300  | 2.43002700  | 1.32184300  |
| C                                                                                         | 6.55742900  | 0.21232400  | -0.69677800 |
| H                                                                                         | 4.83989500  | -1.02138400 | -1.12133300 |
| C                                                                                         | 7.02626300  | 1.35609900  | -0.05660500 |
| H                                                                                         | 6.50223200  | 3.05211500  | 1.16476800  |
| H                                                                                         | 7.23733900  | -0.40610800 | -1.27817600 |
| C                                                                                         | -2.79195800 | 1.07734200  | 1.66931300  |
| C                                                                                         | -4.15312300 | 1.40219800  | 1.73121900  |
| C                                                                                         | -1.98826100 | 1.29580900  | 2.79051800  |
| C                                                                                         | -4.68942400 | 1.96216200  | 2.88441600  |
| H                                                                                         | -4.79653600 | 1.21215400  | 0.87227300  |
| C                                                                                         | -2.52781100 | 1.84880100  | 3.94968200  |
| H                                                                                         | -0.93252700 | 1.02714600  | 2.75348900  |
| C                                                                                         | -3.87606200 | 2.18748700  | 3.99386400  |
| H                                                                                         | -5.74565300 | 2.21753500  | 2.92118300  |
| H                                                                                         | -1.89370800 | 2.01262300  | 4.81752200  |
| H                                                                                         | -4.29841900 | 2.62062500  | 4.89746800  |
| C                                                                                         | -3.25443700 | -1.07732300 | -0.08716400 |
| C                                                                                         | -4.14079600 | -1.14083200 | -1.16158600 |
| C                                                                                         | -3.23226900 | -2.11971100 | 0.84723300  |
| C                                                                                         | -4.99116000 | -2.23651800 | -1.30264800 |
| H                                                                                         | -4.17000100 | -0.33600200 | -1.89385400 |
| C                                                                                         | -4.08709400 | -3.20526200 | 0.71140300  |
| H                                                                                         | -2.52947200 | -2.08229500 | 1.68190000  |
| C                                                                                         | -4.96603500 | -3.26733700 | -0.36975600 |
| H                                                                                         | -5.67779900 | -2.27944000 | -2.14493600 |
| H                                                                                         | -4.06327200 | -4.00912100 | 1.44335900  |
| H                                                                                         | -5.63116800 | -4.12018500 | -0.48199200 |
| C                                                                                         | -2.35613800 | 1.44693600  | -1.20393100 |
| C                                                                                         | -2.92396600 | 2.71323800  | -1.05556100 |
| C                                                                                         | -1.89117400 | 1.05142200  | -2.46587700 |

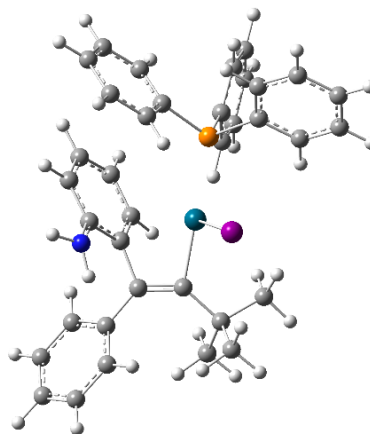



|   |             |             |             |
|---|-------------|-------------|-------------|
| C | -3.03691200 | 3.56526500  | -2.15260000 |
| H | -3.27226700 | 3.04541800  | -0.07938600 |
| C | -2.01562400 | 1.89767100  | -3.56041100 |
| H | -1.42970600 | 0.06992000  | -2.58800700 |
| C | -2.58687300 | 3.15952000  | -3.40422000 |
| H | -3.47832100 | 4.55096600  | -2.02402300 |
| H | -1.65870000 | 1.57494200  | -4.53566200 |
| H | -2.67736700 | 3.82620100  | -4.25849600 |
| C | 2.79016300  | -2.03301400 | 1.43147100  |
| C | 1.64824600  | -2.65213900 | 2.24839800  |
| H | 0.87786200  | -3.08642100 | 1.60128500  |
| H | 2.04613100  | -3.44654600 | 2.89377800  |
| H | 1.17020900  | -1.89982100 | 2.89274400  |
| C | 3.85333200  | -1.54898500 | 2.43144300  |
| H | 4.73991300  | -1.15148800 | 1.92635400  |
| H | 3.44812200  | -0.76313400 | 3.08304100  |
| H | 4.16865600  | -2.38990100 | 3.06296100  |
| C | 3.40248100  | -3.11018400 | 0.53156300  |
| H | 3.69762200  | -3.97389900 | 1.14302400  |
| H | 2.68684600  | -3.45320700 | -0.22325400 |
| H | 4.29818900  | -2.73983800 | 0.02046000  |
| H | 8.07646500  | 1.62917000  | -0.12590800 |

**TS2 complex of (3,3-dimethylbut-1-yn-1-yl)benzene**

Energy = -1208589.440539 kcal/mol

Electronic Energy + Thermal Free Energy Correction (353.150 K) = -1208272.383460 kcal/mol

Imaginary frequency = -300.22 cm<sup>-1</sup>

Symmetry c1

|    |             |             |             |
|----|-------------|-------------|-------------|
| Pd | -0.55666900 | 0.05568400  | -0.11921500 |
| P  | 1.80998100  | -0.35253000 | -0.01932600 |
| I  | -0.99170200 | -2.65044900 | -0.43675600 |
| C  | -0.34708900 | 2.11724000  | 0.17882600  |
| C  | 0.41101600  | 2.87675300  | -0.72241500 |
| C  | -0.55800700 | 2.61077900  | 1.48636700  |
| C  | 0.88374800  | 4.13965800  | -0.39264100 |
| H  | 0.63730200  | 2.46164300  | -1.70389100 |
| C  | -0.07577400 | 3.89219600  | 1.80826600  |
| C  | 0.62626300  | 4.64677100  | 0.88244500  |
| H  | 1.46538400  | 4.71106200  | -1.11196500 |
| H  | -0.24690000 | 4.27680900  | 2.81349400  |
| H  | 0.99405500  | 5.63106900  | 1.16424300  |
| N  | -1.25272100 | 1.88202100  | 2.43828000  |
| H  | -1.14388100 | 0.87781000  | 2.37904400  |
| H  | -1.15911900 | 2.22016000  | 3.38709900  |
| C  | -2.65126000 | 0.48349800  | -0.04463600 |
| C  | -2.29606800 | 1.58281500  | -0.56198700 |
| C  | -3.69290300 | -0.40973900 | 0.40767700  |
| C  | -4.00803400 | -0.48895100 | 1.77029600  |
| C  | -4.41245100 | -1.18695500 | -0.51071500 |
| C  | -5.03186600 | -1.32371400 | 2.20294900  |
| H  | -3.44950500 | 0.11929000  | 2.47912300  |
| C  | -5.43465900 | -2.01773700 | -0.07051700 |
| H  | -4.15630800 | -1.13484900 | -1.56715300 |
| C  | -5.74613300 | -2.09094400 | 1.28596100  |
| H  | -5.27378800 | -1.37310000 | 3.26197700  |
| H  | -5.99180100 | -2.61245900 | -0.79045200 |
| C  | 2.94188500  | 1.08879800  | -0.00495700 |
| C  | 3.67745700  | 1.48830200  | -1.12209600 |
| C  | 3.02113100  | 1.84170900  | 1.17215500  |
| C  | 4.48350800  | 2.62300800  | -1.06075200 |

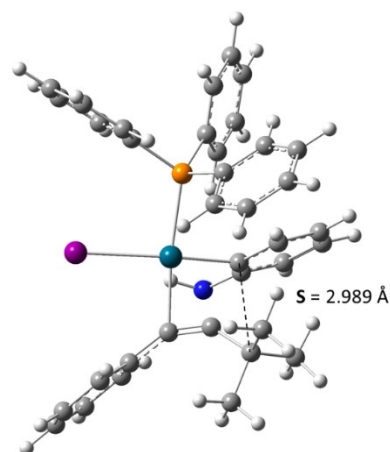

|                                                                                           |             |             |             |
|-------------------------------------------------------------------------------------------|-------------|-------------|-------------|
| H                                                                                         | 3.63273500  | 0.91033200  | -2.04305300 |
| C                                                                                         | 3.82326900  | 2.97297800  | 1.22997200  |
| H                                                                                         | 2.44611900  | 1.54057800  | 2.04820700  |
| C                                                                                         | 4.55803000  | 3.36546600  | 0.11260900  |
| H                                                                                         | 5.05933100  | 2.92074000  | -1.93397400 |
| H                                                                                         | 3.87165500  | 3.55355400  | 2.14848000  |
| H                                                                                         | 5.18810700  | 4.25061500  | 0.15791100  |
| C                                                                                         | 2.36688800  | -1.36459700 | -1.43788700 |
| C                                                                                         | 3.13296800  | -2.52361100 | -1.30657900 |
| C                                                                                         | 1.92826800  | -0.97503300 | -2.70977800 |
| C                                                                                         | 3.45758700  | -3.27941500 | -2.43080900 |
| H                                                                                         | 3.46608600  | -2.85446400 | -0.32507400 |
| C                                                                                         | 2.26568200  | -1.72211800 | -3.83164800 |
| H                                                                                         | 1.29921000  | -0.08998100 | -2.81813500 |
| C                                                                                         | 3.02776400  | -2.88044000 | -3.69209100 |
| H                                                                                         | 4.04683700  | -4.18608200 | -2.31681900 |
| H                                                                                         | 1.92104500  | -1.40822500 | -4.81389400 |
| H                                                                                         | 3.28150400  | -3.47370700 | -4.56722300 |
| C                                                                                         | 2.33306200  | -1.22506900 | 1.50173400  |
| C                                                                                         | 3.69285600  | -1.40777400 | 1.78765200  |
| C                                                                                         | 1.37825900  | -1.66539000 | 2.42111300  |
| C                                                                                         | 4.08459600  | -2.04350600 | 2.95933100  |
| H                                                                                         | 4.44767100  | -1.04094700 | 1.09275200  |
| C                                                                                         | 1.77288500  | -2.29281700 | 3.60049100  |
| H                                                                                         | 0.31984800  | -1.52380000 | 2.20407000  |
| C                                                                                         | 3.12412900  | -2.48688600 | 3.86683400  |
| H                                                                                         | 5.14176300  | -2.18693700 | 3.16887600  |
| H                                                                                         | 1.02153800  | -2.62986500 | 4.31034200  |
| H                                                                                         | 3.43243600  | -2.97875600 | 4.78626400  |
| C                                                                                         | -2.82240700 | 2.73235500  | -1.37957100 |
| H                                                                                         | -6.54546100 | -2.74429000 | 1.62707100  |
| C                                                                                         | -2.74901800 | 4.06521800  | -0.63723500 |
| H                                                                                         | -3.22340800 | 3.98808500  | 0.34928900  |
| H                                                                                         | -1.71984700 | 4.40852600  | -0.50367600 |
| H                                                                                         | -3.28913900 | 4.82455500  | -1.21661500 |
| C                                                                                         | -2.14559800 | 2.82668600  | -2.74678200 |
| H                                                                                         | -2.70929400 | 3.52667100  | -3.37602500 |
| H                                                                                         | -1.12030800 | 3.19831400  | -2.67548500 |
| H                                                                                         | -2.13329900 | 1.85009300  | -3.24693500 |
| C                                                                                         | -4.30314100 | 2.37932100  | -1.60028500 |
| H                                                                                         | -4.41017200 | 1.44498100  | -2.16358700 |
| H                                                                                         | -4.83297800 | 2.27190900  | -0.64632000 |
| H                                                                                         | -4.78214800 | 3.18369700  | -2.17186000 |
| <b>INT2 complex of (3,3-dimethylbut-1-yn-1-yl)benzene</b>                                 |             |             |             |
| Energy = -1208625.714325 kcal/mol                                                         |             |             |             |
| Electronic Energy + Thermal Free Energy Correction (353.150 K) = -1208305.613199 kcal/mol |             |             |             |
| Symmetry c1                                                                               |             |             |             |
| Pd                                                                                        | -0.52491800 | 0.05817800  | -0.05449300 |
| P                                                                                         | 1.96358000  | -0.13552800 | -0.01478200 |
| I                                                                                         | -0.70726200 | -2.60189300 | 0.05889600  |
| C                                                                                         | -1.21747500 | 2.23650300  | -0.19563800 |
| C                                                                                         | -0.60244100 | 2.39989700  | -1.46340600 |
| C                                                                                         | -0.60836500 | 2.84410600  | 0.94690100  |
| C                                                                                         | 0.54965900  | 3.15426500  | -1.61927200 |
| H                                                                                         | -1.09547600 | 1.94834800  | -2.32359200 |
| C                                                                                         | 0.54969600  | 3.61298400  | 0.76547900  |
| C                                                                                         | 1.10239100  | 3.77243300  | -0.49578600 |
| H                                                                                         | 1.01195300  | 3.26619300  | -2.59625000 |
| H                                                                                         | 1.01518500  | 4.08449200  | 1.62975200  |

|   |             |             |             |
|---|-------------|-------------|-------------|
| H | 2.00783200  | 4.36744600  | -0.59959200 |
| N | -1.21075400 | 2.74583100  | 2.17399600  |
| H | -1.85352100 | 1.97519300  | 2.30527100  |
| H | -0.65166500 | 2.96924000  | 2.98522100  |
| C | -2.57238600 | 0.35565000  | -0.05012300 |
| C | -2.61828800 | 1.68582600  | -0.10766200 |
| C | -3.61251000 | -0.66282700 | 0.03591500  |
| C | -4.08542500 | -1.09315100 | 1.28397800  |
| C | -4.13204900 | -1.25679800 | -1.12197700 |
| C | -5.05800400 | -2.08170600 | 1.36972900  |
| H | -3.67601200 | -0.63894400 | 2.18671300  |
| C | -5.10754200 | -2.24371000 | -1.03416600 |
| H | -3.75145800 | -0.94128500 | -2.09303800 |
| C | -5.57167900 | -2.66235800 | 0.21103400  |
| H | -5.41792100 | -2.40224700 | 2.34496500  |
| H | -5.50486900 | -2.69112500 | -1.94262700 |
| C | 3.14642100  | 1.25827100  | -0.24761500 |
| C | 3.69820800  | 1.57658500  | -1.49128200 |
| C | 3.46426300  | 2.05964700  | 0.85545500  |
| C | 4.55415100  | 2.66651800  | -1.62667200 |
| H | 3.47022800  | 0.96835600  | -2.36452600 |
| C | 4.32541900  | 3.14228800  | 0.72190500  |
| H | 3.03789100  | 1.83246400  | 1.83212000  |
| C | 4.87242100  | 3.45020600  | -0.52191400 |
| H | 4.98054500  | 2.89571900  | -2.60054100 |
| H | 4.56863400  | 3.74812100  | 1.59180700  |
| H | 5.54746400  | 4.29602100  | -0.62770900 |
| C | 2.41872100  | -1.29529200 | -1.35845500 |
| C | 3.16907700  | -2.45664800 | -1.17256700 |
| C | 1.89838900  | -1.01655000 | -2.62890400 |
| C | 3.40601300  | -3.31810200 | -2.24124800 |
| H | 3.55533300  | -2.70718900 | -0.18687600 |
| C | 2.14915800  | -1.86805100 | -3.69821300 |
| H | 1.27898200  | -0.13006100 | -2.77712900 |
| C | 2.90171400  | -3.02484100 | -3.50420400 |
| H | 3.98570900  | -4.22430300 | -2.08219700 |
| H | 1.74471800  | -1.63684700 | -4.68074900 |
| H | 3.08859400  | -3.69935800 | -4.33625400 |
| C | 2.59733700  | -0.84569500 | 1.55123400  |
| C | 3.96119100  | -1.09664500 | 1.75315500  |
| C | 1.70438700  | -1.06370200 | 2.60347200  |
| C | 4.41290000  | -1.58656700 | 2.97253300  |
| H | 4.67651600  | -0.89570400 | 0.95644600  |
| C | 2.15877800  | -1.54469400 | 3.82913000  |
| H | 0.64425200  | -0.85839400 | 2.45359800  |
| C | 3.51138300  | -1.81222100 | 4.01155700  |
| H | 5.47236700  | -1.78428800 | 3.11647000  |
| H | 1.45382500  | -1.70682700 | 4.64083100  |
| H | 3.86838900  | -2.18925000 | 4.96705000  |
| C | -3.83058500 | 2.62257800  | -0.19197200 |
| H | -6.33129900 | -3.43742700 | 0.27961000  |
| C | -3.39503300 | 4.08747500  | -0.12503600 |
| H | -2.92279100 | 4.32769200  | 0.83544700  |
| H | -2.69189200 | 4.34419200  | -0.92844100 |
| H | -4.27539900 | 4.73240400  | -0.23859400 |
| C | -4.53015500 | 2.38401000  | -1.53556900 |
| H | -5.39106100 | 3.05837700  | -1.63990400 |
| H | -3.84831800 | 2.57430200  | -2.37491700 |
| H | -4.89288600 | 1.35237000  | -1.61637500 |
| C | -4.81573000 | 2.34962400  | 0.94694000  |

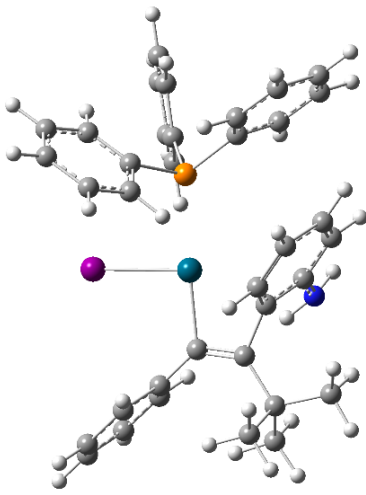

|                                                                                           |             |             |             |
|-------------------------------------------------------------------------------------------|-------------|-------------|-------------|
| H                                                                                         | -5.20893500 | 1.32792400  | 0.90583900  |
| H                                                                                         | -4.34031800 | 2.49314700  | 1.92613600  |
| H                                                                                         | -5.66595000 | 3.04162900  | 0.88052700  |
| <b>ADS complex of 1-(phenylethynyl)adamantane</b>                                         |             |             |             |
| Energy = -1354257.372398 kcal/mol                                                         |             |             |             |
| Electronic Energy + Thermal Free Energy Correction (353.150 K) = -1353871.153159 kcal/mol |             |             |             |
| Symmetry c1                                                                               |             |             |             |
| Pd                                                                                        | -0.12045300 | 0.17401200  | -0.12973100 |
| P                                                                                         | 2.03415700  | -0.68126100 | 0.15240900  |
| I                                                                                         | -0.23073000 | -0.58960500 | -2.84967600 |
| C                                                                                         | -0.03748000 | 0.72119500  | 1.83754500  |
| C                                                                                         | 0.43923300  | 1.98738100  | 2.15775400  |
| C                                                                                         | -0.48130300 | -0.13587300 | 2.85763600  |
| C                                                                                         | 0.43770800  | 2.44927700  | 3.47574600  |
| H                                                                                         | 0.82228000  | 2.63809600  | 1.36962000  |
| C                                                                                         | -0.50501000 | 0.34408100  | 4.17597400  |
| C                                                                                         | -0.04963200 | 1.62013400  | 4.48164700  |
| H                                                                                         | 0.81215500  | 3.44471300  | 3.70485800  |
| H                                                                                         | -0.86553300 | -0.31529600 | 4.96620900  |
| H                                                                                         | -0.06965500 | 1.96245300  | 5.51430300  |
| N                                                                                         | -0.81300100 | -1.46944000 | 2.60963600  |
| H                                                                                         | -1.05713600 | -1.67440000 | 1.64824400  |
| H                                                                                         | -1.46630100 | -1.88156000 | 3.26424700  |
| C                                                                                         | -1.72716000 | 1.91326900  | -0.48932700 |
| C                                                                                         | -2.41148500 | 0.91704200  | -0.25555000 |
| C                                                                                         | -1.02211500 | 3.14396700  | -0.68553500 |
| C                                                                                         | -1.23902900 | 4.20438300  | 0.20813600  |
| C                                                                                         | -0.10246600 | 3.29945700  | -1.73400600 |
| C                                                                                         | -0.54104600 | 5.39529000  | 0.05697200  |
| H                                                                                         | -1.94785400 | 4.07450100  | 1.02301000  |
| C                                                                                         | 0.59679800  | 4.49141300  | -1.87106800 |
| H                                                                                         | 0.06293200  | 2.47097600  | -2.42153500 |
| C                                                                                         | 0.38189000  | 5.53870900  | -0.97691500 |
| H                                                                                         | -0.71172100 | 6.21167000  | 0.75403800  |
| H                                                                                         | 1.31334000  | 4.60421700  | -2.68139100 |
| C                                                                                         | 2.97530500  | -0.23452300 | 1.65657200  |
| C                                                                                         | 3.98187600  | 0.73286600  | 1.63950800  |
| C                                                                                         | 2.62611100  | -0.84210500 | 2.86896100  |
| C                                                                                         | 4.62580100  | 1.09368900  | 2.82108700  |
| H                                                                                         | 4.27333300  | 1.20805300  | 0.70548100  |
| C                                                                                         | 3.27553600  | -0.48393200 | 4.04269300  |
| H                                                                                         | 1.83472900  | -1.59068500 | 2.89493700  |
| C                                                                                         | 4.27318200  | 0.48937300  | 4.02232600  |
| H                                                                                         | 5.40969300  | 1.84676000  | 2.79636700  |
| H                                                                                         | 2.99192200  | -0.95796200 | 4.97958100  |
| H                                                                                         | 4.77670900  | 0.77260200  | 4.94357900  |
| C                                                                                         | 3.04952500  | -0.04848900 | -1.22791600 |
| C                                                                                         | 3.84240600  | -0.88176300 | -2.01741000 |
| C                                                                                         | 2.98142300  | 1.31898100  | -1.52073100 |
| C                                                                                         | 4.54995200  | -0.35374000 | -3.09496400 |
| H                                                                                         | 3.89483300  | -1.94839100 | -1.80846500 |
| C                                                                                         | 3.69691300  | 1.84410400  | -2.58851600 |
| H                                                                                         | 2.34384200  | 1.97375900  | -0.92421500 |
| C                                                                                         | 4.47792300  | 1.00552400  | -3.38223600 |
| H                                                                                         | 5.15823100  | -1.01019100 | -3.71233300 |
| H                                                                                         | 3.63786900  | 2.90768300  | -2.80825300 |
| H                                                                                         | 5.02934000  | 1.41360100  | -4.22571200 |
| C                                                                                         | 2.14110400  | -2.50175500 | 0.10841500  |
| C                                                                                         | 1.04389400  | -3.26341200 | -0.30139900 |

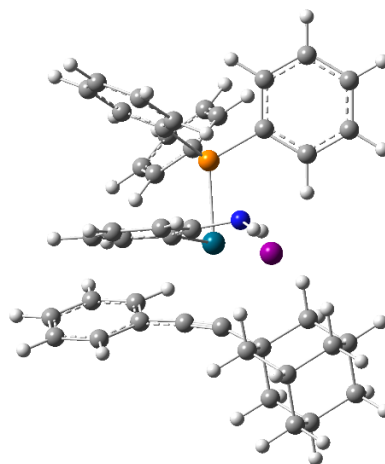

|   |             |             |             |
|---|-------------|-------------|-------------|
| C | 3.32620200  | -3.14773700 | 0.48391700  |
| C | 1.13074700  | -4.65204200 | -0.34064400 |
| H | 0.12306200  | -2.76376100 | -0.60087100 |
| C | 3.41153100  | -4.53409900 | 0.43634900  |
| H | 4.18436500  | -2.56462600 | 0.81530100  |
| C | 2.31312900  | -5.28673300 | 0.02634000  |
| H | 0.27090300  | -5.23741800 | -0.65652000 |
| H | 4.33572800  | -5.02813200 | 0.72535200  |
| H | 2.37992300  | -6.37144700 | -0.00354200 |
| H | 0.93307100  | 6.46932300  | -1.08720800 |
| C | -3.95939700 | 0.07624100  | 1.45918600  |
| H | -4.14427600 | 1.12226500  | 1.74642700  |
| H | -3.12238900 | -0.28827000 | 2.07240500  |
| C | -3.56118300 | 0.02612700  | -0.03222900 |
| C | -5.20925000 | -0.77518400 | 1.69295300  |
| H | -5.47511800 | -0.73048600 | 2.75822200  |
| C | -6.36512700 | -0.23070500 | 0.84866600  |
| H | -6.59098100 | 0.80550500  | 1.14145300  |
| H | -7.27362800 | -0.82388600 | 1.02895600  |
| C | -4.74026900 | 0.56145800  | -0.87845900 |
| H | -4.45518000 | 0.54132500  | -1.94137900 |
| H | -4.92913900 | 1.61150200  | -0.61054100 |
| C | -5.98954700 | -0.28863800 | -0.63484600 |
| H | -6.81337300 | 0.10964600  | -1.24318700 |
| C | -5.70555500 | -1.73919700 | -1.03214300 |
| H | -6.60395700 | -2.35416700 | -0.87546100 |
| H | -5.45542600 | -1.79707900 | -2.10186100 |
| C | -3.29711300 | -1.43423500 | -0.43914500 |
| H | -2.45049000 | -1.83414300 | 0.13961700  |
| H | -2.99990500 | -1.47194500 | -1.49702100 |
| C | -4.91785900 | -2.22423000 | 1.29326700  |
| H | -4.09427400 | -2.62459400 | 1.90484300  |
| H | -5.79924800 | -2.85330600 | 1.48597800  |
| C | -4.54647000 | -2.28179600 | -0.19130100 |
| H | -4.33264300 | -3.32001700 | -0.48054500 |

**TS1 complex of 1-(phenylethynyl)adamantane**

Energy = -1354241.313815 kcal/mol

Electronic Energy + Thermal Free Energy Correction (353.150 K) = -1353855.257101 kcal/mol

Imaginary frequency = -284.60 cm<sup>-1</sup>

Symmetry c1

|    |             |             |             |
|----|-------------|-------------|-------------|
| Pd | -0.10338000 | -0.06353700 | 0.04399500  |
| P  | 2.31078500  | -0.38057500 | -0.01825200 |
| I  | -0.35570200 | -2.64420000 | 1.01928600  |
| C  | 0.08794000  | 1.81465700  | -0.83583900 |
| C  | -0.26531100 | 1.90388300  | -2.18416600 |
| C  | 0.89808900  | 2.80344600  | -0.24579300 |
| C  | 0.21534700  | 2.94109500  | -2.97985900 |
| H  | -0.94415500 | 1.16075500  | -2.60442400 |
| C  | 1.36342200  | 3.85082800  | -1.05412900 |
| C  | 1.03346100  | 3.91175200  | -2.40072700 |
| H  | -0.05902600 | 2.99859000  | -4.03020600 |
| H  | 2.00489000  | 4.61133200  | -0.60892800 |
| H  | 1.41064800  | 4.73546000  | -3.00316200 |
| N  | 1.26508600  | 2.71670500  | 1.08225500  |
| H  | 0.63883000  | 2.19346200  | 1.68084500  |
| H  | 1.60184800  | 3.57059000  | 1.50671700  |
| C  | -1.77510200 | 1.51706900  | 0.19580000  |
| C  | -2.19410600 | 0.33820000  | -0.01937000 |
| C  | -2.03620000 | 2.81195700  | 0.79518400  |

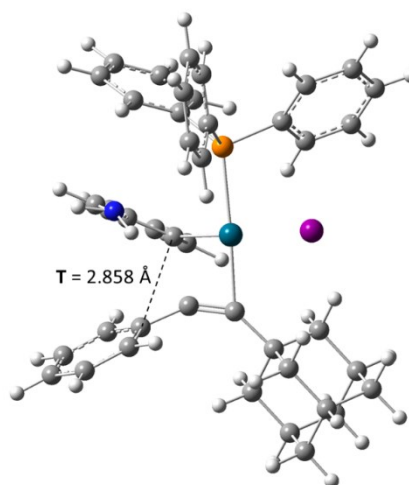

|   |             |             |             |
|---|-------------|-------------|-------------|
| C | -2.03438400 | 3.99684700  | 0.04946900  |
| C | -2.38871300 | 2.84583800  | 2.15130000  |
| C | -2.38614100 | 5.19532100  | 0.65626400  |
| H | -1.76230500 | 3.96413600  | -1.00389000 |
| C | -2.73130800 | 4.05078100  | 2.75400800  |
| H | -2.38972600 | 1.91611200  | 2.71867100  |
| C | -2.72959100 | 5.22563600  | 2.00735900  |
| H | -2.39315600 | 6.11256100  | 0.07256300  |
| H | -3.00105700 | 4.07131100  | 3.80687500  |
| C | 3.39799400  | 0.84195700  | -0.86313900 |
| C | 3.55516500  | 0.81996500  | -2.25231900 |
| C | 4.04251400  | 1.84370500  | -0.12824800 |
| C | 4.33565500  | 1.77856800  | -2.89191500 |
| H | 3.07490000  | 0.04612800  | -2.84778300 |
| C | 4.82746600  | 2.79592600  | -0.76838700 |
| H | 3.92297000  | 1.88846800  | 0.95134000  |
| C | 4.97478500  | 2.76785400  | -2.15245300 |
| H | 4.44961000  | 1.74285100  | -3.97286500 |
| H | 5.32607900  | 3.56389200  | -0.18132100 |
| H | 5.58927900  | 3.51289500  | -2.65236300 |
| C | 2.59408800  | -1.91144300 | -0.99033800 |
| C | 3.46642300  | -2.92956900 | -0.60390200 |
| C | 1.83881500  | -2.07108900 | -2.15954600 |
| C | 3.58350300  | -4.08390500 | -1.37503000 |
| H | 4.04444600  | -2.84128500 | 0.31323300  |
| C | 1.96903100  | -3.21517600 | -2.93720400 |
| H | 1.12088700  | -1.29996700 | -2.44692100 |
| C | 2.84032600  | -4.22814300 | -2.54194600 |
| H | 4.25837800  | -4.87507100 | -1.05687700 |
| H | 1.37828900  | -3.32310400 | -3.84358100 |
| H | 2.93369500  | -5.13124900 | -3.14012400 |
| C | 3.13671000  | -0.61786500 | 1.59608100  |
| C | 4.52424200  | -0.78527000 | 1.70079300  |
| C | 2.36629700  | -0.58108800 | 2.76109900  |
| C | 5.12108500  | -0.93655900 | 2.94701700  |
| H | 5.14499400  | -0.78261200 | 0.80590600  |
| C | 2.96573500  | -0.72739800 | 4.00909800  |
| H | 1.28836400  | -0.44282200 | 2.68084300  |
| C | 4.34211000  | -0.90967200 | 4.10167900  |
| H | 6.19792900  | -1.06835500 | 3.01758900  |
| H | 2.35610900  | -0.69595700 | 4.90880300  |
| H | 4.81137800  | -1.02367500 | 5.07603300  |
| H | -2.99767400 | 6.16874300  | 2.47749700  |
| C | -3.27321300 | -1.48040300 | -1.38118300 |
| H | -2.49718400 | -2.20215800 | -1.09066500 |
| H | -2.92287900 | -0.97509800 | -2.29610100 |
| C | -3.44081300 | -0.43582500 | -0.26533100 |
| C | -4.60337100 | -2.19352600 | -1.63477000 |
| H | -4.46296500 | -2.94497600 | -2.42457400 |
| C | -5.05893400 | -2.88275700 | -0.34422500 |
| H | -4.31015700 | -3.62564900 | -0.02872700 |
| H | -6.00006600 | -3.42488800 | -0.51990500 |
| C | -3.93238000 | -1.11910200 | 1.02523100  |
| H | -4.05759800 | -0.35228900 | 1.80658000  |
| H | -3.17271900 | -1.82757300 | 1.38050900  |
| C | -5.25791100 | -1.83838100 | 0.75877200  |
| H | -5.58652100 | -2.33442500 | 1.68293900  |
| C | -6.31318600 | -0.82200600 | 0.31480100  |
| H | -7.27526100 | -1.32698700 | 0.14117400  |
| H | -6.47812300 | -0.07687300 | 1.10765500  |

|                                                                                           |             |             |             |
|-------------------------------------------------------------------------------------------|-------------|-------------|-------------|
| C                                                                                         | -4.51775500 | 0.58181200  | -0.70997700 |
| H                                                                                         | -4.16967500 | 1.09867000  | -1.61838600 |
| H                                                                                         | -4.63738600 | 1.34655500  | 0.07334500  |
| C                                                                                         | -5.65954600 | -1.17406800 | -2.07197700 |
| H                                                                                         | -5.34701700 | -0.68470200 | -3.00673900 |
| H                                                                                         | -6.61421300 | -1.68167500 | -2.27535500 |
| C                                                                                         | -5.84726800 | -0.13001300 | -0.96899300 |
| H                                                                                         | -6.59416500 | 0.61285400  | -1.28327000 |
| <b>INT1 complex of 1-(phenylethynyl)adamantane</b>                                        |             |             |             |
| Energy = -1354269.736835 kcal/mol                                                         |             |             |             |
| Electronic Energy + Thermal Free Energy Correction (353.150 K) = -1353881.542198 kcal/mol |             |             |             |
| Symmetry c1                                                                               |             |             |             |
| Pd                                                                                        | -0.02424900 | -0.04434200 | 0.06349300  |
| P                                                                                         | -2.49233200 | -0.10474900 | 0.28043700  |
| I                                                                                         | 0.01951500  | -1.48058300 | -2.22252900 |
| C                                                                                         | 0.91009800  | 2.13410800  | 0.28965700  |
| C                                                                                         | 0.30267400  | 2.03690900  | 1.56511400  |
| C                                                                                         | 0.35634100  | 3.03111000  | -0.67169800 |
| C                                                                                         | -0.80642600 | 2.82026100  | 1.90490400  |
| H                                                                                         | 0.80231300  | 1.42176600  | 2.31545900  |
| C                                                                                         | -0.73673600 | 3.81514300  | -0.30516700 |
| C                                                                                         | -1.30305100 | 3.71171300  | 0.96576800  |
| H                                                                                         | -1.25344000 | 2.73782600  | 2.89221000  |
| H                                                                                         | -1.15673600 | 4.50966200  | -1.03159900 |
| H                                                                                         | -2.15312000 | 4.34366800  | 1.21360100  |
| N                                                                                         | 0.87405100  | 3.06749500  | -1.94559000 |
| H                                                                                         | 1.82170900  | 2.73411500  | -2.06478600 |
| H                                                                                         | 0.65749100  | 3.88343100  | -2.50065300 |
| C                                                                                         | 2.20755000  | 1.41563000  | 0.06390600  |
| C                                                                                         | 2.01909500  | 0.08652600  | 0.07732900  |
| C                                                                                         | 3.44283200  | 2.22617800  | -0.01977500 |
| C                                                                                         | 3.63419200  | 3.30282800  | 0.85602700  |
| C                                                                                         | 4.40869000  | 1.98454400  | -1.00510100 |
| C                                                                                         | 4.77653900  | 4.09043600  | 0.77240500  |
| H                                                                                         | 2.88166400  | 3.50995300  | 1.61635100  |
| C                                                                                         | 5.55084000  | 2.77356400  | -1.08979500 |
| H                                                                                         | 4.24109100  | 1.18307300  | -1.72296300 |
| C                                                                                         | 5.74081900  | 3.82585800  | -0.19790700 |
| H                                                                                         | 4.91611300  | 4.91419700  | 1.46876600  |
| H                                                                                         | 6.28902500  | 2.57386600  | -1.86309800 |
| C                                                                                         | -3.13734300 | -0.15362400 | 1.99624300  |
| C                                                                                         | -4.50604300 | -0.29489700 | 2.25810700  |
| C                                                                                         | -2.23952900 | -0.12350300 | 3.06596000  |
| C                                                                                         | -4.96652400 | -0.37441700 | 3.56665300  |
| H                                                                                         | -5.21462100 | -0.34630000 | 1.43161100  |
| C                                                                                         | -2.70048800 | -0.21110800 | 4.37754200  |
| H                                                                                         | -1.17105600 | -0.03536000 | 2.86823100  |
| C                                                                                         | -4.06336300 | -0.33041900 | 4.62772400  |
| H                                                                                         | -6.03145400 | -0.47809500 | 3.76019500  |
| H                                                                                         | -1.99263800 | -0.18899000 | 5.20255700  |
| H                                                                                         | -4.42483600 | -0.39731100 | 5.65105900  |
| C                                                                                         | -3.30526300 | -1.59147300 | -0.42390100 |
| C                                                                                         | -4.31866500 | -1.54411100 | -1.38077100 |
| C                                                                                         | -2.84781600 | -2.83488100 | 0.02884900  |
| C                                                                                         | -4.86275400 | -2.72463700 | -1.88415100 |
| H                                                                                         | -4.68599500 | -0.58398100 | -1.73916000 |
| C                                                                                         | -3.39709700 | -4.01015100 | -0.46624900 |
| H                                                                                         | -2.04275800 | -2.88032600 | 0.76477100  |
| C                                                                                         | -4.40410700 | -3.95641900 | -1.42983000 |

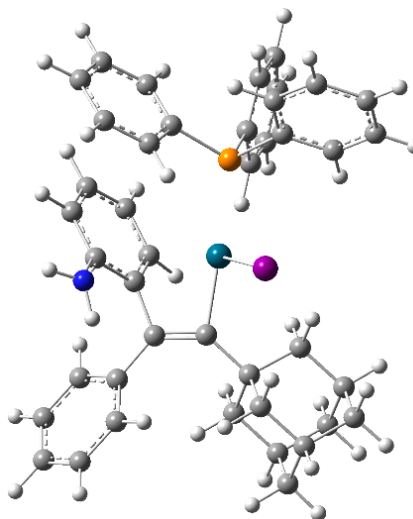

|                                                                                           |             |             |             |
|-------------------------------------------------------------------------------------------|-------------|-------------|-------------|
| H                                                                                         | -5.65068600 | -2.67749100 | -2.63227200 |
| H                                                                                         | -3.03503900 | -4.97055400 | -0.10677800 |
| H                                                                                         | -4.82914100 | -4.87639800 | -1.82419000 |
| C                                                                                         | -3.31239600 | 1.30854800  | -0.54031800 |
| C                                                                                         | -4.14428700 | 2.21612600  | 0.11761800  |
| C                                                                                         | -2.98945400 | 1.53111300  | -1.88637400 |
| C                                                                                         | -4.65966500 | 3.31755800  | -0.56269200 |
| H                                                                                         | -4.38383200 | 2.07292200  | 1.16966900  |
| C                                                                                         | -3.51211600 | 2.62400600  | -2.56514200 |
| H                                                                                         | -2.32067700 | 0.83986500  | -2.40208100 |
| C                                                                                         | -4.34851700 | 3.52166900  | -1.90251400 |
| H                                                                                         | -5.30538900 | 4.01851100  | -0.03881300 |
| H                                                                                         | -3.26179700 | 2.78082500  | -3.61175600 |
| H                                                                                         | -4.75367900 | 4.38093500  | -2.43164000 |
| H                                                                                         | 6.63280000  | 4.44417800  | -0.26374100 |
| C                                                                                         | 3.98591700  | -0.65773000 | 1.39599400  |
| H                                                                                         | 4.59646500  | 0.15914100  | 0.98759400  |
| H                                                                                         | 3.47439800  | -0.26316000 | 2.28910200  |
| C                                                                                         | 4.88976900  | -1.83560200 | 1.77035300  |
| H                                                                                         | 5.63652500  | -1.48770600 | 2.49886900  |
| C                                                                                         | 2.91952800  | -1.08992000 | 0.35726200  |
| C                                                                                         | 3.65030100  | -1.63678000 | -0.88596300 |
| H                                                                                         | 4.25818300  | -0.83809300 | -1.33373200 |
| H                                                                                         | 2.91470500  | -1.94719900 | -1.63977600 |
| C                                                                                         | 5.59649400  | -2.35152300 | 0.51425500  |
| H                                                                                         | 6.26604000  | -3.18502600 | 0.77467800  |
| H                                                                                         | 6.22110200  | -1.55686500 | 0.07826000  |
| C                                                                                         | 4.55119800  | -2.81473600 | -0.50367100 |
| H                                                                                         | 5.05420000  | -3.18421400 | -1.40878500 |
| C                                                                                         | 3.70347000  | -3.93362200 | 0.10662600  |
| H                                                                                         | 2.95428300  | -4.27973400 | -0.62230500 |
| H                                                                                         | 4.33904900  | -4.79702900 | 0.35444100  |
| C                                                                                         | 4.05405100  | -2.96031300 | 2.38359700  |
| H                                                                                         | 3.56132800  | -2.60761100 | 3.30235600  |
| H                                                                                         | 4.70270200  | -3.80304600 | 2.66647200  |
| C                                                                                         | 2.10416100  | -2.23923600 | 0.99602100  |
| H                                                                                         | 1.58582700  | -1.85522300 | 1.89251200  |
| H                                                                                         | 1.32626200  | -2.57017700 | 0.29355000  |
| C                                                                                         | 3.00592500  | -3.41691400 | 1.36785600  |
| H                                                                                         | 2.38833000  | -4.21546500 | 1.80325200  |
| <b>TS2 complex of 1-(phenylethynyl)adamantane</b>                                         |             |             |             |
| Energy = -1354239.052273 kcal/mol                                                         |             |             |             |
| Electronic Energy + Thermal Free Energy Correction (353.150 K) = -1353853.576004 kcal/mol |             |             |             |
| Imaginary frequency = -312.58 cm <sup>-1</sup>                                            |             |             |             |
| Symmetry c1                                                                               |             |             |             |
| Pd                                                                                        | 0.11598700  | 0.42954500  | -0.04516800 |
| P                                                                                         | 2.29290900  | -0.56779500 | 0.15269300  |
| I                                                                                         | 1.18311900  | 2.82433000  | 0.81138500  |
| C                                                                                         | -0.78210300 | -1.34435000 | -0.70936300 |
| C                                                                                         | -0.76448400 | -2.46887900 | 0.12850500  |
| C                                                                                         | -0.93021100 | -1.52933700 | -2.10332900 |
| C                                                                                         | -0.97368700 | -3.74981000 | -0.36428800 |
| H                                                                                         | -0.57138600 | -2.33055400 | 1.19196500  |
| C                                                                                         | -1.14475300 | -2.83142000 | -2.59112400 |
| C                                                                                         | -1.17240000 | -3.92098000 | -1.73588500 |
| H                                                                                         | -0.94893800 | -4.60553800 | 0.30629400  |
| H                                                                                         | -1.27018100 | -2.97246100 | -3.66449700 |
| H                                                                                         | -1.32936600 | -4.91648000 | -2.14579400 |
| N                                                                                         | -0.90482900 | -0.46336800 | -2.98559900 |



|   |             |             |             |
|---|-------------|-------------|-------------|
| H | -0.33582100 | 0.32305200  | -2.70117900 |
| H | -0.77380500 | -0.70675200 | -3.95823700 |
| C | -1.79605000 | 1.28086300  | -0.43186500 |
| C | -2.25560100 | 0.13024500  | -0.16590800 |
| C | -2.03777900 | 2.66612100  | -0.77140200 |
| C | -1.83022400 | 3.11221100  | -2.08308200 |
| C | -2.48661700 | 3.57188100  | 0.19931600  |
| C | -2.07347500 | 4.43911400  | -2.41688700 |
| H | -1.47965900 | 2.40708400  | -2.83478700 |
| C | -2.72738900 | 4.89698600  | -0.14158700 |
| H | -2.63150600 | 3.22713100  | 1.22160100  |
| C | -2.51901100 | 5.33534500  | -1.44787900 |
| H | -1.91322100 | 4.77520800  | -3.43856700 |
| H | -3.07870500 | 5.59216800  | 0.61721700  |
| C | 2.44715500  | -2.38187100 | -0.04738900 |
| C | 2.68099400  | -3.24684000 | 1.02356300  |
| C | 2.28154300  | -2.91126800 | -1.33213300 |
| C | 2.75068200  | -4.62169400 | 0.80944400  |
| H | 2.81859300  | -2.84904000 | 2.02738700  |
| C | 2.35250900  | -4.28137400 | -1.54240800 |
| H | 2.08477800  | -2.24497800 | -2.17264700 |
| C | 2.58700700  | -5.14039700 | -0.47049100 |
| H | 2.94004800  | -5.28732900 | 1.64833900  |
| H | 2.21636100  | -4.68145500 | -2.54470700 |
| H | 2.64314600  | -6.21389600 | -0.63462600 |
| C | 3.05060900  | -0.22318500 | 1.78077200  |
| C | 4.34089600  | 0.28208600  | 1.94480800  |
| C | 2.24662900  | -0.42799200 | 2.90889400  |
| C | 4.81989500  | 0.57516800  | 3.21944900  |
| H | 4.97307400  | 0.46677200  | 1.07868000  |
| C | 2.73231100  | -0.15162500 | 4.18085700  |
| H | 1.22464200  | -0.78971800 | 2.78509100  |
| C | 4.02052800  | 0.35645300  | 4.33691900  |
| H | 5.82287800  | 0.97853300  | 3.33694600  |
| H | 2.10071300  | -0.31923700 | 5.04973800  |
| H | 4.39832700  | 0.58632700  | 5.33021900  |
| C | 3.46519700  | 0.02836500  | -1.12153000 |
| C | 4.72760000  | -0.56447100 | -1.25748000 |
| C | 3.09166400  | 1.04558900  | -2.00367700 |
| C | 5.60869700  | -0.12593000 | -2.23811500 |
| H | 5.01949700  | -1.37971400 | -0.59627300 |
| C | 3.97202600  | 1.47657100  | -2.99353000 |
| H | 2.11022000  | 1.50922500  | -1.90345500 |
| C | 5.23102400  | 0.89632000  | -3.10692600 |
| H | 6.58875600  | -0.58745000 | -2.33055300 |
| H | 3.67072700  | 2.26758800  | -3.67587100 |
| H | 5.91887000  | 1.23568800  | -3.87769800 |
| H | -2.70570800 | 6.37387600  | -1.71007700 |
| C | -5.13377200 | -2.86030200 | 1.13181800  |
| H | -4.37491900 | -3.65773300 | 1.10935200  |
| H | -6.07841600 | -3.31979100 | 1.45841700  |
| C | -5.29864300 | -2.25719600 | -0.26649800 |
| H | -5.59849300 | -3.04269200 | -0.97424900 |
| C | -4.71657200 | -1.76612300 | 2.11953200  |
| H | -4.60070700 | -2.19747000 | 3.12361000  |
| C | -3.37448800 | -1.17289500 | 1.68004600  |
| H | -2.60439200 | -1.95245400 | 1.69484000  |
| H | -3.05311800 | -0.37919500 | 2.37241400  |
| C | -3.96016600 | -1.66872000 | -0.72262800 |
| H | -4.05783200 | -1.22250500 | -1.72474700 |

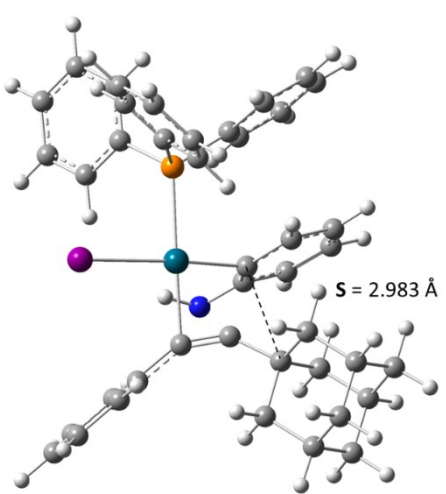

S = 2.983 Å

|                                                                                           |             |             |             |
|-------------------------------------------------------------------------------------------|-------------|-------------|-------------|
| H                                                                                         | -3.21263500 | -2.46540600 | -0.78823200 |
| C                                                                                         | -3.49791100 | -0.58525100 | 0.26373200  |
| C                                                                                         | -4.58413000 | 0.52013900  | 0.30248000  |
| H                                                                                         | -4.27147200 | 1.31426400  | 0.99640400  |
| H                                                                                         | -4.67503000 | 0.97582400  | -0.69511900 |
| C                                                                                         | -6.36150700 | -1.15839900 | -0.23289100 |
| H                                                                                         | -7.33113600 | -1.57589200 | 0.07667300  |
| H                                                                                         | -6.49710800 | -0.73297300 | -1.23847300 |
| C                                                                                         | -5.78036300 | -0.66665200 | 2.14710700  |
| H                                                                                         | -6.74303200 | -1.08048600 | 2.48180300  |
| H                                                                                         | -5.49573600 | 0.11574500  | 2.86640500  |
| C                                                                                         | -5.92668500 | -0.06735400 | 0.74708000  |
| H                                                                                         | -6.67254200 | 0.73979400  | 0.76337300  |
| <b>INT2 complex of 1-(phenylethynyl)adamantane</b>                                        |             |             |             |
| Energy = -1354274.856681 kcal/mol                                                         |             |             |             |
| Electronic Energy + Thermal Free Energy Correction (353.150 K) = -1353887.654135 kcal/mol |             |             |             |
| Symmetry c1                                                                               |             |             |             |
| Pd                                                                                        | -0.18507000 | -0.31772400 | 0.00333500  |
| P                                                                                         | -2.57522500 | 0.39806300  | 0.03818200  |
| I                                                                                         | -0.98205900 | -2.86502400 | -0.06482800 |
| C                                                                                         | 1.25316000  | 1.46271900  | 0.09484100  |
| C                                                                                         | 0.76218000  | 1.83085800  | 1.37329400  |
| C                                                                                         | 0.88168300  | 2.25421600  | -1.03707900 |
| C                                                                                         | -0.03815800 | 2.94953700  | 1.54934500  |
| H                                                                                         | 1.07720000  | 1.22957100  | 2.22543000  |
| C                                                                                         | 0.09158200  | 3.39353800  | -0.83369100 |
| C                                                                                         | -0.34576200 | 3.73444900  | 0.43719300  |
| H                                                                                         | -0.41242400 | 3.21398200  | 2.53478700  |
| H                                                                                         | -0.18376400 | 4.00718000  | -1.69023400 |
| H                                                                                         | -0.97227700 | 4.61643400  | 0.55703500  |
| N                                                                                         | 1.37182600  | 1.94178600  | -2.27855000 |
| H                                                                                         | 1.67811600  | 0.98757000  | -2.41909700 |
| H                                                                                         | 0.90947500  | 2.35500900  | -3.07614900 |
| C                                                                                         | 1.83250000  | -0.78167300 | -0.03561300 |
| C                                                                                         | 2.35868200  | 0.44277400  | -0.01408900 |
| C                                                                                         | 2.43043200  | -2.11017400 | -0.10196000 |
| C                                                                                         | 2.68906100  | -2.71641100 | -1.33983900 |
| C                                                                                         | 2.73000600  | -2.81893400 | 1.06913400  |
| C                                                                                         | 3.24279000  | -3.98935000 | -1.40357500 |
| H                                                                                         | 2.44782800  | -2.17119600 | -2.25269200 |
| C                                                                                         | 3.28622200  | -4.09136500 | 1.00344000  |
| H                                                                                         | 2.51364400  | -2.36107000 | 2.03399800  |
| C                                                                                         | 3.54183500  | -4.68308700 | -0.23203000 |
| H                                                                                         | 3.44155000  | -4.44339400 | -2.37193700 |
| H                                                                                         | 3.51925800  | -4.62600400 | 1.92171400  |
| C                                                                                         | -3.14953200 | 2.14371700  | 0.17883500  |
| C                                                                                         | -3.58392400 | 2.71801700  | 1.37535800  |
| C                                                                                         | -3.12104100 | 2.93205600  | -0.97772800 |
| C                                                                                         | -3.98767000 | 4.05124100  | 1.41123400  |
| H                                                                                         | -3.61921200 | 2.12459400  | 2.28697800  |
| C                                                                                         | -3.52962800 | 4.25925500  | -0.94327200 |
| H                                                                                         | -2.77535900 | 2.50355600  | -1.91880400 |
| C                                                                                         | -3.96453100 | 4.82362100  | 0.25458300  |
| H                                                                                         | -4.33103400 | 4.48209700  | 2.34896500  |
| H                                                                                         | -3.50710500 | 4.85500900  | -1.85295100 |
| H                                                                                         | -4.28670100 | 5.86170300  | 0.28409900  |
| C                                                                                         | -3.32996200 | -0.42096800 | 1.49309400  |
| C                                                                                         | -4.42844800 | -1.27913700 | 1.42658400  |
| C                                                                                         | -2.68832000 | -0.23097700 | 2.72423300  |

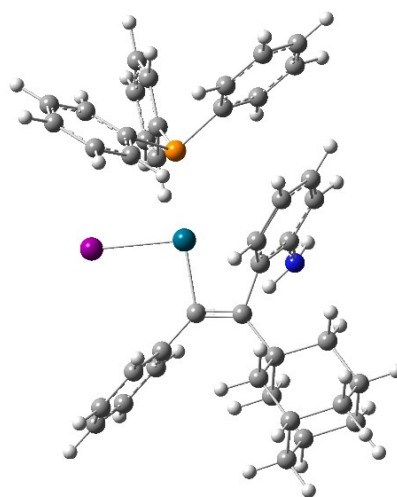

|   |             |             |             |
|---|-------------|-------------|-------------|
| C | -4.88521200 | -1.92507500 | 2.57297600  |
| H | -4.92168600 | -1.46556100 | 0.47488200  |
| C | -3.15358900 | -0.86539500 | 3.87002800  |
| H | -1.80741700 | 0.41099900  | 2.77996100  |
| C | -4.25366700 | -1.71752800 | 3.79492400  |
| H | -5.73853200 | -2.59599200 | 2.50743600  |
| H | -2.65062300 | -0.70393800 | 4.82047000  |
| H | -4.61286400 | -2.22350200 | 4.68780100  |
| C | -3.54471200 | -0.11808000 | -1.42943200 |
| C | -4.92444100 | 0.11274500  | -1.51186200 |
| C | -2.88133100 | -0.66484000 | -2.53008700 |
| C | -5.62899300 | -0.23723700 | -2.65723800 |
| H | -5.44817900 | 0.58136100  | -0.67907200 |
| C | -3.58532400 | -1.00223000 | -3.68398300 |
| H | -1.80550600 | -0.82780800 | -2.47750200 |
| C | -4.95962000 | -0.79794000 | -3.74388100 |
| H | -6.70105300 | -0.06305900 | -2.70717400 |
| H | -3.05717700 | -1.42457000 | -4.53540000 |
| H | -5.51148900 | -1.06534400 | -4.64192100 |
| H | 3.97312100  | -5.68003400 | -0.28240900 |
| C | 3.95340200  | 2.41335800  | -0.07918900 |
| H | 3.51303600  | 2.76524400  | -1.02424800 |
| H | 3.39080100  | 2.89221100  | 0.73863500  |
| C | 5.42265200  | 2.83823600  | -0.00512900 |
| H | 5.48085600  | 3.93365500  | -0.07896200 |
| C | 3.82219100  | 0.88118200  | 0.01748100  |
| C | 4.62725000  | 0.25294900  | -1.13598900 |
| H | 4.18674000  | 0.56029900  | -2.09798100 |
| H | 4.55528100  | -0.84212300 | -1.08435400 |
| C | 6.19571100  | 2.20270600  | -1.16326900 |
| H | 7.25027700  | 2.51564700  | -1.13012800 |
| H | 5.78557100  | 2.54716300  | -2.12471000 |
| C | 6.09611300  | 0.67920600  | -1.06505300 |
| H | 6.64501800  | 0.21601600  | -1.89756500 |
| C | 6.69301800  | 0.21415800  | 0.26665200  |
| H | 6.63936000  | -0.88265700 | 0.34074400  |
| H | 7.75651100  | 0.49127400  | 0.32057400  |
| C | 6.02503900  | 2.37898500  | 1.32449000  |
| H | 5.49141800  | 2.84988000  | 2.16405500  |
| H | 7.07717700  | 2.69424400  | 1.39162500  |
| C | 4.45497700  | 0.43315800  | 1.35406400  |
| H | 3.88810700  | 0.87408400  | 2.19014600  |
| H | 4.37203700  | -0.65973200 | 1.44797800  |
| C | 5.92483000  | 0.85567000  | 1.42605800  |
| H | 6.34924700  | 0.51760300  | 2.38248400  |
